# Supplementary material
Source: publisher figshare collection journal article supplement (https://gsapubs.figshare.com/articles/dataset/_/12535535)
Supplement: Supplementary file 1 [file 1]

## Sheet: HighThroughputAges - LA-ICP-MS
University of Calgary, Centre for Pure and Applied Tectonics and Thermochronology
15-CC-01 HT		f206c	207Pb CPS	206Pb CPS	U (ppm)1	U/Th	206Pb/204Pb	1σ %	Data for Tera-Wasserburg plot2				208Pb/206Pb	2σx (%)	Data for Wetherill plot2					208Pb/232Th	2σx (%)	Dates									208Pb/232Th	2σx (ABS)	2σtotal (ABS)	Prob. Conc. (%)	% conc3	Comments	Accepted Dates4
Sample	Spot								238U/206Pb	2σx (%)	207Pb/206Pb	2σx (%)			207Pb/235Pb	2σx (%)	206Pb/238U	2σx (%)	Rho			207Pb/206Pb	2σx (ABS)	2σtotal (ABS)	206Pb/238U	2σx (ABS)	2σtotal (ABS)	207Pb/235Pb	2σx (ABS)	2σtotal (ABS)							Date (Ma)	2σx (ABS)	2σx (%)	2σtotal (ABS)	2σtotal (%)
UK012	UK012_356	NA	50	1110	114.4	1.39683	NA	NA	100	7.48514	0.05	27.0501	NA	NA	0.06894	28.0667	0.01	7.48514	-0.14372	NA	NA	NA	NA	NA	64.144	4.77746	4.84284	67.6931	18.3817	18.4071	NA	NA	NA	71.8229	NA		64.144	4.77746	7.44803	4.84284	7.5119
UK012	UK012_576	NA	378	8100	886	2.15572	NA	NA	95.511	4.15046	0.0475	12.6385	NA	NA	0.0685712	13.3026	0.01047	4.15046	-0.050677	NA	NA	NA	NA	NA	67.1431	2.77228	2.89386	67.3426	8.66791	8.72109	NA	NA	NA	96.5521	NA		67.1431	2.77228	4.12892	2.89386	4.30865
UK012	UK012_632	NA	149	2760	282	1.88377	NA	NA	95.1475	5.095	0.057	13.8708	NA	NA	0.0825998	14.7769	0.01051	5.095	0.17313	NA	NA	NA	NA	NA	67.3983	3.41605	3.51617	80.5862	11.4484	11.5053	NA	NA	NA	2.10702	NA		67.3983	3.41605	5.06846	3.51617	5.17993
UK012	UK012_236	NA	506	9180	787	1.8345	NA	NA	94.6074	4.41792	0.0546	8.78788	NA	NA	0.0795736	9.8359	0.01057	4.41792	0.03337	NA	NA	NA	NA	NA	67.781	2.97883	3.0944	77.744	7.36153	7.44394	NA	NA	NA	1.14242	NA		67.781	2.97883	4.39478	3.0944	4.47933
UK012	UK012_442	NA	414	8170	693	1.44979	NA	NA	94.0734	4.06124	0.0512	9.45777	NA	NA	0.075042	10.2929	0.01063	4.06124	0.81257	NA	NA	NA	NA	NA	68.1637	2.75371	2.87972	73.4729	7.29546	7.37008	NA	NA	NA	4.63508	NA		68.1637	2.75371	4.03985	2.87972	4.32931
UK012	UK012_78	NA	287	5710	546	1.25806	NA	NA	93.4579	4.63864	0.0533	12.0374	NA	NA	0.0786343	12.9002	0.0107	4.63864	0.062997	NA	NA	NA	NA	NA	68.6102	3.16571	3.27732	76.8602	9.54945	9.61174	NA	NA	NA	9.56778	NA		68.6102	3.16571	4.61405	3.27732	4.7299
UK012	UK012_624	NA	268	5520	577	0.785034	NA	NA	93.4579	4.0756	0.0474	11.4469	NA	NA	0.06993	12.1508	0.0107	4.0756	-0.036024	NA	NA	NA	NA	NA	68.6102	2.78145	2.90785	68.633	8.06403	8.12329	NA	NA	NA	99.5786	NA		68.6102	2.78145	4.05399	2.90785	4.23806
UK012	UK012_39	NA	554	10420	938	1.16667	NA	NA	93.1966	4.03751	0.0525	9.19233	NA	NA	0.0776713	10.0399	0.01073	4.03751	0.20059	NA	NA	NA	NA	NA	68.8016	2.7631	2.891	75.9532	7.34755	7.42651	NA	NA	NA	5.11806	NA		68.8016	2.7631	4.01605	2.891	4.17352
UK012	UK012_347	NA	867	18250	1670	1.27774	NA	NA	92.6784	3.968	0.0463	8.55533	NA	NA	0.0688817	9.43073	0.01079	3.968	-0.14533	NA	NA	NA	NA	NA	69.1842	2.73055	2.8613	67.6377	6.17099	6.24609	NA	NA	NA	66.3007	NA		69.1842	2.73055	3.94678	2.8613	4.15403
UK012	UK012_360	NA	448	9230	879	1.31194	NA	NA	92.6784	4.23094	0.0492	9.33807	NA	NA	0.0731961	10.2519	0.01079	4.23094	-0.12459	NA	NA	NA	NA	NA	69.1842	2.91149	3.03446	71.7279	7.09983	7.17302	NA	NA	NA	52.5297	NA		69.1842	2.91149	4.20832	3.03446	4.35845
UK012	UK012_143	NA	62	1240	105.3	1.73476	NA	NA	92.5926	7.46913	0.051	19.4908	NA	NA	0.0759443	20.8729	0.0108	7.46913	-0.20967	NA	NA	NA	NA	NA	69.248	5.14454	5.21525	74.3247	14.9606	14.998	NA	NA	NA	54.6522	NA		69.248	5.14454	7.42916	5.21525	7.44923
UK012	UK012_439	NA	266	5700	466	1.72913	NA	NA	91.8274	4.35747	0.0466	11.7671	NA	NA	0.0699705	12.548	0.01089	4.35747	-0.26571	NA	NA	NA	NA	NA	69.822	3.02605	3.14668	68.6715	8.33218	8.38961	NA	NA	NA	81.0318	NA		69.822	3.02605	4.33396	3.14668	4.51957
UK012	UK012_318	NA	129	3030	250.9	1.03892	NA	NA	91.4077	4.82552	0.042	16.9841	NA	NA	0.0633531	17.6563	0.01094	4.82552	-0.31557	NA	NA	NA	NA	NA	70.1408	3.36631	3.47612	62.3722	10.6816	10.7189	NA	NA	NA	20.0492	NA		70.1408	3.36631	4.79936	3.47612	5.04187
UK012	UK012_519	NA	402	7940	674	1.58588	NA	NA	91.0747	4.07713	0.048	9.91798	NA	NA	0.0726683	10.7233	0.01098	4.07713	0.12069	NA	NA	NA	NA	NA	70.3959	2.85452	2.98415	71.2284	7.37642	7.44596	NA	NA	NA	82.6221	NA		70.3959	2.85452	4.05495	2.98415	4.23421
UK012	UK012_571	NA	228	5320	548	1.71357	NA	NA	90.9918	4.56963	0.045	10.8468	NA	NA	0.0681886	11.7701	0.01099	4.56963	0.48814	NA	NA	NA	NA	NA	70.4596	3.20221	3.31849	66.979	7.62922	7.68896	NA	NA	NA	29.6388	NA		70.4596	3.20221	4.54475	3.31849	4.70125
UK012	UK012_177	NA	465	8380	671	1.72051	NA	NA	90.0901	4.20512	0.0522	9.46274	NA	NA	0.0798904	10.355	0.0111	4.20512	0.22021	NA	NA	NA	NA	NA	71.161	2.97595	3.10315	78.0419	7.77866	7.85726	NA	NA	NA	7.44539	NA		71.161	2.97595	4.182	3.10315	4.3346
UK012	UK012_398	NA	204	3960	364	1.511	NA	NA	88.1834	4.78537	0.054	12.6865	NA	NA	0.0844322	13.559	0.01134	4.78537	-0.28696	NA	NA	NA	NA	NA	72.691	3.45899	3.5737	82.3034	10.7196	10.7829	NA	NA	NA	11.545	NA		72.691	3.45899	4.75849	3.5737	4.81969
UK012	UK012_317	NA	250	4710	368.7	2.34691	NA	NA	87.4126	4.99357	0.0512	10.3431	NA	NA	0.0807602	11.4855	0.01144	4.99357	0.11011	NA	NA	NA	NA	NA	73.3283	3.64095	3.75198	78.8594	8.7148	8.78645	NA	NA	NA	22.3434	NA		73.3283	3.64095	4.96528	3.75198	5.07164
UK012	UK012_630	NA	227	4420	422.8	1.78774	NA	NA	86.6551	4.2725	0.052	13.5976	NA	NA	0.082739	14.253	0.01154	4.2725	-0.071395	NA	NA	NA	NA	NA	73.9657	3.14212	3.27231	80.7168	11.0596	11.1188	NA	NA	NA	25.0215	NA		73.9657	3.14212	4.24808	3.27231	4.38827
UK012	UK012_390	NA	308	6690	597	0.981908	NA	NA	84.7458	4.0997	0.0456	10.2654	NA	NA	0.0741905	11.0538	0.0118	4.0997	0.3088	NA	NA	NA	NA	NA	75.6224	3.08218	3.22064	72.6683	7.75204	7.82082	NA	NA	NA	42.4326	NA		75.6224	3.08218	4.07575	3.22064	4.26538
UK012	UK012_446	NA	109	2080	157.4	1.21638	NA	NA	84.0336	5.61514	0.0499	13.2488	NA	NA	0.0818745	14.3896	0.0119	5.61514	0.40925	NA	NA	NA	NA	NA	76.2595	4.25685	4.35983	79.9058	11.0577	11.1158	NA	NA	NA	47.0756	NA		76.2595	4.25685	5.58206	4.35983	5.72034
UK012	UK012_487	NA	984	20540	1437	1.62925	NA	NA	80.9717	4.13605	0.0466	7.90674	NA	NA	0.0793513	8.9232	0.01235	4.13605	0.0033308	NA	NA	NA	NA	NA	79.1256	3.25267	3.39629	77.5349	6.66113	6.75162	NA	NA	NA	66.7218	NA		79.1256	3.25267	4.11077	3.39629	4.30891
UK012	UK012_475	NA	371	8440	599	2.63065	NA	NA	78.3085	4.06363	0.0433	10.6778	NA	NA	0.0762395	11.4249	0.01277	4.06363	0.038088	NA	NA	NA	NA	NA	81.7995	3.30303	3.454	74.6033	8.21794	8.28622	NA	NA	NA	9.86776	NA		81.7995	3.30303	4.03796	3.454	4.27155
UK012	UK012_10	NA	724	14520	897	1.98891	NA	NA	76.3942	4.09386	0.0504	9.27718	NA	NA	0.0909644	10.1403	0.01309	4.09386	0.067031	NA	NA	NA	NA	NA	83.836	3.40991	3.56352	88.4014	8.58523	8.67568	NA	NA	NA	31.2389	NA		83.836	3.40991	4.06735	3.56352	4.22344
UK012	UK012_272	NA	115	2760	174.4	1.23513	NA	NA	76.3359	5.61275	0.0433	13.8074	NA	NA	0.0782097	14.9046	0.0131	5.61275	0.32252	NA	NA	NA	NA	NA	83.8997	4.67857	4.79185	76.4603	10.9781	11.0317	NA	NA	NA	15.3267	NA		83.8997	4.67857	5.57639	4.79185	5.73699
UK012	UK012_532	NA	234	4770	362	1.20667	NA	NA	76.3359	4.20955	0.05	16.3739	NA	NA	0.0903114	16.9063	0.0131	4.20955	-0.45655	NA	NA	NA	NA	NA	83.8997	3.50891	3.65859	87.7934	14.22	14.2741	NA	NA	NA	62.965	NA		83.8997	3.50891	4.18227	3.65859	4.33359
UK012	UK012_350	NA	369	8060	598	1.33185	NA	NA	76.0456	4.25972	0.048	11.0581	NA	NA	0.0870299	11.8502	0.01315	4.25972	0.15537	NA	NA	NA	NA	NA	84.2178	3.56411	3.71265	84.7328	9.63372	9.70815	NA	NA	NA	91.5793	NA		84.2178	3.56411	4.23202	3.71265	4.4063
UK012	UK012_251	NA	141	2410	154	1.32873	NA	NA	75.9878	5.1363	0.059	13.0302	NA	NA	0.107056	14.006	0.01316	5.1363	-0.21788	NA	NA	NA	NA	NA	84.2814	4.30077	4.42483	103.268	13.7534	13.8295	NA	NA	NA	1.35761	NA		84.2814	4.30077	5.10287	4.42483	5.09791
UK012	UK012_220	NA	411	7520	481	1.41056	NA	NA	75.815	4.00163	0.0523	8.68044	NA	NA	0.0951147	9.5584	0.01319	4.00163	0.14019	NA	NA	NA	NA	NA	84.4723	3.35822	3.51639	92.2568	8.42972	8.52961	NA	NA	NA	7.19548	NA		84.4723	3.35822	3.97552	3.51639	4.12592
UK012	UK012_403	NA	337	7410	606	1.65574	NA	NA	75.5287	4.48707	0.0456	9.45665	NA	NA	0.0832442	10.4672	0.01324	4.48707	-0.20809	NA	NA	NA	NA	NA	84.7904	3.77969	3.92194	81.1905	8.16765	8.24843	NA	NA	NA	45.6857	NA		84.7904	3.77969	4.45769	3.92194	4.66931
UK012	UK012_17	NA	155	3340	210.4	1.73454	NA	NA	75.358	4.38268	0.043	18.578	NA	NA	0.0786757	19.088	0.01327	4.38268	0.069867	NA	NA	NA	NA	NA	84.9813	3.70002	3.84586	76.8991	14.1373	14.1795	NA	NA	NA	25.8609	NA		84.9813	3.70002	4.35392	3.84586	4.54687
UK012	UK012_352	NA	159	2920	225.2	0.94861	NA	NA	74.6269	4.61911	0.051	15.5705	NA	NA	0.0942272	16.2412	0.0134	4.61911	-0.3321	NA	NA	NA	NA	NA	85.8083	3.93732	4.07729	91.4336	14.2019	14.2604	NA	NA	NA	48.1411	NA		85.8083	3.93732	4.5885	4.07729	4.71041
UK012	UK012_530	NA	475	9860	722	1.69087	NA	NA	74.5156	4.33118	0.0481	10.7145	NA	NA	0.0890018	11.5568	0.01342	4.33118	-0.38642	NA	NA	NA	NA	NA	85.9355	3.69733	3.84647	86.5731	9.59073	9.66861	NA	NA	NA	91.1994	NA		85.9355	3.69733	4.30244	3.84647	4.46918
UK012	UK012_284	NA	132	2940	191.4	1.21678	NA	NA	73.9098	4.9477	0.0452	13.6239	NA	NA	0.0843213	14.4945	0.01353	4.9477	0.10219	NA	NA	NA	NA	NA	86.6352	4.25778	4.39	82.1996	11.4454	11.5046	NA	NA	NA	45.1229	NA		86.6352	4.25778	4.9146	4.39	5.09203
UK012	UK012_162	NA	258	4680	312	1.34483	NA	NA	73.7463	5.09038	0.055	13.7688	NA	NA	0.102831	14.6796	0.01356	5.09038	-0.00065215	NA	NA	NA	NA	NA	86.826	4.39014	4.51905	99.3861	13.8991	13.9692	NA	NA	NA	8.64561	NA		86.826	4.39014	5.05625	4.51905	5.13821
UK012	UK012_319	NA	176	4080	264.1	1.01538	NA	NA	73.7463	4.11555	0.0418	13.8354	NA	NA	0.0781515	14.4345	0.01356	4.11555	-0.32603	NA	NA	NA	NA	NA	86.826	3.54941	3.70766	76.4055	10.6244	10.6798	NA	NA	NA	8.77529	NA		86.826	3.54941	4.08796	3.70766	4.35755
UK012	UK012_443	NA	136	2760	180.2	1.16033	NA	NA	73.5835	4.41233	0.0472	13.365	NA	NA	0.0884429	14.0745	0.01359	4.41233	0.10932	NA	NA	NA	NA	NA	87.0168	3.81367	3.96201	86.0518	11.6129	11.6766	NA	NA	NA	87.0236	NA		87.0168	3.81367	4.38268	3.96201	4.55667
UK012	UK012_386	NA	144	3110	245	0.790323	NA	NA	73.5294	5.49871	0.049	14.4312	NA	NA	0.0918832	15.4433	0.0136	5.49871	-0.45182	NA	NA	NA	NA	NA	87.0804	4.7561	4.87603	89.2562	13.1964	13.2565	NA	NA	NA	78.4742	NA		87.0804	4.7561	5.46174	4.87603	5.57149
UK012	UK012_504	NA	296	5800	395	1.08219	NA	NA	73.5294	5.23533	0.0468	10.2072	NA	NA	0.0877579	11.4715	0.0136	5.23533	0.39622	NA	NA	NA	NA	NA	87.0804	4.5283	4.65409	85.4126	9.3976	9.47506	NA	NA	NA	70.0076	NA		87.0804	4.5283	5.20013	4.65409	5.34961
UK012	UK012_269	NA	406	8320	517	1.36053	NA	NA	73.0994	4.1092	0.0487	11.3408	NA	NA	0.0918579	12.0623	0.01368	4.1092	0.30055	NA	NA	NA	NA	NA	87.5892	3.57487	3.73474	89.2326	10.3044	10.3813	NA	NA	NA	73.8542	NA		87.5892	3.57487	4.08141	3.73474	4.26253
UK012	UK012_37	NA	376	8700	602	2.92233	NA	NA	72.8332	4.09161	0.0431	10.1714	NA	NA	0.0815923	10.9636	0.01373	4.09161	0.29222	NA	NA	NA	NA	NA	87.9072	3.57241	3.73351	79.6408	8.39802	8.47377	NA	NA	NA	4.07391	NA		87.9072	3.57241	4.06384	3.73351	4.2722
UK012	UK012_140	NA	136	3110	211.7	1.66039	NA	NA	72.2022	5.01731	0.0432	13.4321	NA	NA	0.0824964	14.3386	0.01385	5.01731	0.041494	NA	NA	NA	NA	NA	88.6702	4.4184	4.55188	80.4892	11.0959	11.1545	NA	NA	NA	16.3242	NA		88.6702	4.4184	4.98296	4.55188	5.19461
UK012	UK012_619	NA	389	8680	711	0.901141	NA	NA	71.9942	4.50226	0.0448	11.1621	NA	NA	0.0857989	12.0359	0.01389	4.50226	0.068132	NA	NA	NA	NA	NA	88.9245	3.97612	4.12478	83.5823	9.65722	9.72956	NA	NA	NA	29.3425	NA		88.9245	3.97612	4.47135	4.12478	4.67445
UK012	UK012_186	NA	147	3640	225.6	1.37226	NA	NA	71.6846	4.83836	0.04	15.4258	NA	NA	0.076937	16.1668	0.01395	4.83836	-0.24615	NA	NA	NA	NA	NA	89.306	4.29116	4.43041	75.2611	11.7278	11.7766	NA	NA	NA	3.5781	NA		89.306	4.29116	4.805	4.43041	5.09897
UK012	UK012_606	NA	158	2800	224.7	0.902047	NA	NA	70.5219	4.98884	0.055	14.1181	NA	NA	0.107533	14.9736	0.01418	4.98884	0.07878	NA	NA	NA	NA	NA	90.7681	4.49654	4.63392	103.706	14.7628	14.8344	NA	NA	NA	8.81255	NA		90.7681	4.49654	4.95388	4.63392	5.05875
UK012	UK012_200	NA	134	2660	153.6	0.858101	NA	NA	70.2741	4.67078	0.054	14.3984	NA	NA	0.10595	15.137	0.01423	4.67078	0.055288	NA	NA	NA	NA	NA	91.0859	4.22451	4.37145	102.254	14.7254	14.7952	NA	NA	NA	14.0803	NA		91.0859	4.22451	4.63794	4.37145	4.76295
UK012	UK012_304	NA	186	3580	220	1.375	NA	NA	69.979	5.06529	0.05	13.3044	NA	NA	0.0985153	14.236	0.01429	5.06529	-0.24492	NA	NA	NA	NA	NA	91.4673	4.60037	4.73677	95.4049	12.964	13.0335	NA	NA	NA	59.4626	NA		91.4673	4.60037	5.02952	4.73677	5.14249
UK012	UK012_222	NA	123	2460	148	1.44956	NA	NA	69.5894	5.07589	0.051	15.7497	NA	NA	0.101048	16.5474	0.01437	5.07589	-0.40374	NA	NA	NA	NA	NA	91.9757	4.63544	4.77231	97.7434	15.4211	15.4823	NA	NA	NA	51.788	NA		91.9757	4.63544	5.03985	4.77231	5.13767
UK012	UK012_109	NA	111	1880	132.3	1.64757	NA	NA	69.1085	4.94513	0.062	20.7674	NA	NA	0.123698	21.348	0.01447	4.94513	-0.37361	NA	NA	NA	NA	NA	92.6112	4.547	4.68835	118.419	23.866	23.923	NA	NA	NA	4.86525	NA		92.6112	4.547	4.90978	4.68835	4.93892
UK012	UK012_484	NA	125	2490	149.4	1.42557	NA	NA	68.9655	5.56779	0.0492	13.6646	NA	NA	0.0983636	14.7553	0.0145	5.56779	0.701	NA	NA	NA	NA	NA	92.8018	5.13	5.2562	95.2647	13.4182	13.4851	NA	NA	NA	63.8944	NA		92.8018	5.13	5.52791	5.2562	5.69411
UK012	UK012_604	NA	186	3400	265.1	1.74523	NA	NA	68.9655	5.31756	0.0534	12.0428	NA	NA	0.10676	13.1645	0.0145	5.31756	0.022161	NA	NA	NA	NA	NA	92.8018	4.89944	5.03143	102.998	12.8948	12.9756	NA	NA	NA	13.7918	NA		92.8018	4.89944	5.27947	5.03143	5.35167
UK012	UK012_349	NA	98	2330	156.7	2.01155	NA	NA	68.6813	4.77877	0.042	19.1891	NA	NA	0.0843164	19.7752	0.01456	4.77877	0.082496	NA	NA	NA	NA	NA	93.1831	4.42097	4.56798	82.195	15.615	15.6584	NA	NA	NA	16.4159	NA		93.1831	4.42097	4.74439	4.56798	4.93475
UK012	UK012_20	NA	223	3550	202.7	1.57132	NA	NA	68.4932	4.62843	0.057	13.5711	NA	NA	0.114744	14.3386	0.0146	4.62843	-0.24471	NA	NA	NA	NA	NA	93.4372	4.29349	4.44552	110.296	14.9873	15.0665	NA	NA	NA	4.31639	NA		93.4372	4.29349	4.59505	4.44552	4.65452
UK012	UK012_119	NA	46	1260	86.5	1.89278	NA	NA	68.4932	6.90692	0.038	21.2038	NA	NA	0.0764958	22.3003	0.0146	6.90692	0.032259	NA	NA	NA	NA	NA	93.4372	6.40708	6.50994	74.8451	16.0917	16.1269	NA	NA	NA	2.87959	NA		93.4372	6.40708	6.8571	6.50994	7.15449
UK012	UK012_566	NA	69	1096	85.4	1.42809	NA	NA	68.4932	5.29913	0.062	17.6138	NA	NA	0.124809	18.3937	0.0146	5.29913	0.26957	NA	NA	NA	NA	NA	93.4372	4.91565	5.04898	119.422	20.7265	20.7931	NA	NA	NA	1.01959	NA		93.4372	4.91565	5.26091	5.04898	5.4182
UK012	UK012_627	NA	1423	29550	2194	0.910373	NA	NA	68.2594	3.95242	0.048	7.42611	NA	NA	0.0969572	8.41241	0.01465	3.95242	0.32819	NA	NA	NA	NA	NA	93.7549	3.67877	3.85629	93.9637	7.55004	7.66534	NA	NA	NA	95.3946	NA		93.7549	3.67877	3.92382	3.85629	4.11239
UK012	UK012_640	NA	201	3680	262.4	1.05892	NA	NA	68.2594	4.72532	0.05	13.2457	NA	NA	0.100997	14.0634	0.01465	4.72532	0.024652	NA	NA	NA	NA	NA	93.7549	4.39815	4.54768	97.6963	13.0998	13.1718	NA	NA	NA	56.6056	NA		93.7549	4.39815	4.69112	4.54768	4.83135
UK012	UK012_7	NA	154	3430	187.2	1.13869	NA	NA	68.0272	5.04671	0.0423	10.841	NA	NA	0.0857352	11.9581	0.0147	5.04671	0.4646	NA	NA	NA	NA	NA	94.0725	4.7131	4.85386	83.5227	9.5883	9.66105	NA	NA	NA	1.25444	NA		94.0725	4.7131	5.01007	4.85386	5.17138
UK012	UK012_197	NA	90	1670	99.5	1.44833	NA	NA	67.5676	5.75829	0.056	16.5007	NA	NA	0.114275	17.4766	0.0148	5.75829	0.24105	NA	NA	NA	NA	NA	94.7078	5.41369	5.5383	109.868	18.2009	18.2657	NA	NA	NA	8.88444	NA		94.7078	5.41369	5.7162	5.5383	5.83257
UK012	UK012_580	NA	724	14430	1128	1.6988	NA	NA	67.2495	3.97986	0.0485	8.80915	NA	NA	0.0994384	9.66646	0.01487	3.97986	0.31939	NA	NA	NA	NA	NA	95.1525	3.75913	3.93808	96.2578	8.87752	8.98039	NA	NA	NA	79.4026	NA		95.1525	3.75913	3.95063	3.93808	4.13639
UK012	UK012_71	NA	118	2300	158.4	1.17595	NA	NA	67.1141	5.48607	0.058	15.9296	NA	NA	0.119156	16.8478	0.0149	5.48607	-0.50808	NA	NA	NA	NA	NA	95.343	5.19209	5.32361	114.306	18.2156	18.2854	NA	NA	NA	7.72349	NA		95.343	5.19209	5.4457	5.32361	5.40798
UK012	UK012_185	NA	618	12380	714	1.20812	NA	NA	66.7557	4.14512	0.047	8.85078	NA	NA	0.0970758	9.77335	0.01498	4.14512	0.29765	NA	NA	NA	NA	NA	95.8511	3.94375	4.11713	94.0735	8.78129	8.88085	NA	NA	NA	67.5083	NA		95.8511	3.94375	4.11445	4.11713	4.30118
UK012	UK012_348	NA	835	16870	1095	1.04685	NA	NA	66.7557	4.06238	0.0494	8.04537	NA	NA	0.102033	9.01282	0.01498	4.06238	0.086345	NA	NA	NA	NA	NA	95.8511	3.86503	4.04179	98.6511	8.47317	8.58602	NA	NA	NA	53.4397	NA		95.8511	3.86503	4.03232	4.04179	4.19848
UK012	UK012_107	NA	103	2160	149	1.25105	NA	NA	66.2252	5.21155	0.05	15.2904	NA	NA	0.104099	16.1541	0.0151	5.21155	0.061361	NA	NA	NA	NA	NA	96.6132	4.9975	5.13759	100.553	15.4663	15.5307	NA	NA	NA	62.2014	NA		96.6132	4.9975	5.17269	5.13759	5.30061
UK012	UK012_159	NA	256	4560	277	1.32409	NA	NA	66.2252	4.79475	0.0527	12.1275	NA	NA	0.109721	13.041	0.0151	4.79475	0.011749	NA	NA	NA	NA	NA	96.6132	4.59783	4.74971	105.71	13.093	13.1766	NA	NA	NA	18.9763	NA		96.6132	4.59783	4.759	4.74971	4.86776
UK012	UK012_515	NA	386	8360	509	2.29279	NA	NA	66.0066	4.49583	0.0441	10.637	NA	NA	0.0921197	11.5481	0.01515	4.49583	0.07303	NA	NA	NA	NA	NA	96.9308	4.32524	4.4874	89.476	9.89091	9.97136	NA	NA	NA	15.4574	NA		96.9308	4.32524	4.4622	4.4874	4.68085
UK012	UK012_95	NA	498	10500	714	1.74146	NA	NA	65.7462	4.2215	0.0526	9.60214	NA	NA	0.11031	10.4891	0.01521	4.2215	-0.20803	NA	NA	NA	NA	NA	97.3118	4.07717	4.25012	106.249	10.5818	10.686	NA	NA	NA	14.096	NA		97.3118	4.07717	4.1898	4.25012	4.29902
UK012	UK012_280	NA	214	3900	221	4.01089	NA	NA	65.703	4.67935	0.055	13.8977	NA	NA	0.115419	14.6643	0.01522	4.67935	0.033184	NA	NA	NA	NA	NA	97.3753	4.52229	4.67902	110.911	15.4087	15.4866	NA	NA	NA	9.07495	NA		97.3753	4.52229	4.64419	4.67902	4.75865
UK012	UK012_611	NA	431	7350	553	2.02564	NA	NA	65.6599	4.88259	0.0563	10.2532	NA	NA	0.118225	11.3564	0.01523	4.88259	-0.079918	NA	NA	NA	NA	NA	97.4388	4.72176	4.87226	113.462	12.1919	12.2944	NA	NA	NA	1.75884	NA		97.4388	4.72176	4.84587	4.87226	4.88227
UK012	UK012_466	NA	372	7330	433	1.54093	NA	NA	65.4022	3.96696	0.047	9.45791	NA	NA	0.0990847	10.2562	0.01529	3.96696	0.090589	NA	NA	NA	NA	NA	97.8197	3.85117	4.03568	95.9311	9.38863	9.48534	NA	NA	NA	70.0277	NA		97.8197	3.85117	3.93701	4.03568	4.13522
UK012	UK012_227	NA	218	4310	241.2	2.4866	NA	NA	65.3168	4.87201	0.051	11.0685	NA	NA	0.107658	12.0933	0.01531	4.87201	0.42898	NA	NA	NA	NA	NA	97.9467	4.73591	4.88751	103.821	11.9354	12.0239	NA	NA	NA	27.7572	NA		97.9467	4.73591	4.83519	4.88751	4.99497
UK012	UK012_286	NA	213	4220	240.9	1.3229	NA	NA	65.189	4.42552	0.0519	11.2563	NA	NA	0.109773	12.095	0.01534	4.42552	-0.29676	NA	NA	NA	NA	NA	98.1372	4.31019	4.47686	105.757	12.1483	12.2385	NA	NA	NA	27.9051	NA		98.1372	4.31019	4.392	4.47686	4.50168
UK012	UK012_287	NA	430	8480	478	0.965657	NA	NA	65.189	4.46077	0.0486	10.0685	NA	NA	0.102793	11.0124	0.01534	4.46077	0.069876	NA	NA	NA	NA	NA	98.1372	4.34452	4.50992	99.3511	10.4231	10.5163	NA	NA	NA	82.5525	NA		98.1372	4.34452	4.42698	4.50992	4.58818
UK012	UK012_206	NA	929	17370	966	2.13717	NA	NA	65.0618	4.32179	0.0514	7.93749	NA	NA	0.108928	9.03779	0.01537	4.32179	0.68395	NA	NA	NA	NA	NA	98.3277	4.21727	4.38812	104.984	9.01444	9.13384	NA	NA	NA	5.3323	NA		98.3277	4.21727	4.289	4.38812	4.51671
UK012	UK012_494	NA	351	6650	375.3	1.01984	NA	NA	65.0618	4.30554	0.0537	11.8416	NA	NA	0.113802	12.6001	0.01537	4.30554	0.19981	NA	NA	NA	NA	NA	98.3277	4.20141	4.37288	109.437	13.0728	13.1622	NA	NA	NA	8.6738	NA		98.3277	4.20141	4.27287	4.37288	4.42785
UK012	UK012_325	NA	410	8490	495	2.64706	NA	NA	64.9773	4.21082	0.0427	12.621	NA	NA	0.0906083	13.3049	0.01539	4.21082	-0.0044501	NA	NA	NA	NA	NA	98.4546	4.11425	4.28964	88.0698	11.2243	11.2931	NA	NA	NA	8.15409	NA		98.4546	4.11425	4.17882	4.28964	4.41329
UK012	UK012_5	NA	494	9060	471	1.36522	NA	NA	64.9351	4.22529	0.0542	10.4349	NA	NA	0.115086	11.2579	0.0154	4.22529	-0.3994	NA	NA	NA	NA	NA	98.5181	4.13103	4.30596	110.607	11.7983	11.8993	NA	NA	NA	8.47379	NA		98.5181	4.13103	4.19317	4.30596	4.27326
UK012	UK012_485	NA	149	3420	192	0.897196	NA	NA	64.9351	5.87578	0.045	13.809	NA	NA	0.0955508	15.0071	0.0154	5.87578	-0.22692	NA	NA	NA	NA	NA	98.5181	5.7447	5.87176	92.6611	13.2909	13.355	NA	NA	NA	45.2752	NA		98.5181	5.7447	5.83111	5.87176	6.03428
UK012	UK012_313	NA	2230	40200	2271	3.23044	NA	NA	64.8929	3.96345	0.0533	6.70923	NA	NA	0.113248	7.79248	0.01541	3.96345	-0.020286	NA	NA	NA	NA	NA	98.5816	3.87751	4.0636	108.932	8.04922	8.19231	NA	NA	NA	2.19437	NA		98.5816	3.87751	3.9333	4.0636	4.04091
UK012	UK012_105	NA	279	6100	408.7	1.01414	NA	NA	64.6831	4.29934	0.0471	13.3193	NA	NA	0.1004	13.996	0.01546	4.29934	-0.20424	NA	NA	NA	NA	NA	98.899	4.21956	4.39226	97.1451	12.967	13.0389	NA	NA	NA	80.7832	NA		98.899	4.21956	4.26653	4.39226	4.45215
UK012	UK012_413	NA	162	3230	216.4	1.05049	NA	NA	64.6831	4.45044	0.0477	13.3801	NA	NA	0.101679	14.1008	0.01546	4.45044	0.37228	NA	NA	NA	NA	NA	98.899	4.36785	4.5349	98.3245	13.2152	13.2874	NA	NA	NA	92.5415	NA		98.899	4.36785	4.41647	4.5349	4.58496
UK012	UK012_542	NA	99	2230	149.8	1.58351	NA	NA	64.5161	5.37315	0.046	17.9431	NA	NA	0.0983084	18.7304	0.0155	5.37315	0.065705	NA	NA	NA	NA	NA	99.153	5.28688	5.42641	95.2137	17.0249	17.0776	NA	NA	NA	65.1847	NA		99.153	5.28688	5.33204	5.42641	5.48857
UK012	UK012_636	NA	249	4670	318.4	1.23172	NA	NA	64.3501	4.62558	0.052	11.6913	NA	NA	0.111418	12.5731	0.01554	4.62558	0.069577	NA	NA	NA	NA	NA	99.4069	4.56287	4.72464	107.262	12.7989	12.8868	NA	NA	NA	23.8482	NA		99.4069	4.56287	4.5901	4.72464	4.71784
UK012	UK012_546	NA	309	6020	415	0.886752	NA	NA	64.3087	4.34155	0.0554	10.8812	NA	NA	0.118779	11.7154	0.01555	4.34155	0.10791	NA	NA	NA	NA	NA	99.4703	4.28541	4.45747	113.965	12.63	12.7299	NA	NA	NA	2.54139	NA		99.4703	4.28541	4.30822	4.45747	4.43371
UK012	UK012_83	NA	198	4640	313	1.45244	NA	NA	64.1026	4.61939	0.0479	11.5751	NA	NA	0.103029	12.4628	0.0156	4.61939	0.20436	NA	NA	NA	NA	NA	99.7877	4.57409	4.73668	99.5689	11.8206	11.9032	NA	NA	NA	97.0338	NA		99.7877	4.57409	4.58382	4.73668	4.7475
UK012	UK012_480	NA	408	8090	455	1.17571	NA	NA	64.1026	3.97972	0.0479	9.43744	NA	NA	0.103029	10.2422	0.0156	3.97972	-0.15215	NA	NA	NA	NA	NA	99.7877	3.94069	4.12831	99.5689	9.71432	9.81465	NA	NA	NA	96.8333	NA		99.7877	3.94069	3.94908	4.12831	4.13869
UK012	UK012_518	NA	279	6350	375.3	1.26619	NA	NA	64.1026	4.3543	0.0415	10.9514	NA	NA	0.0892635	11.7853	0.0156	4.3543	0.099959	NA	NA	NA	NA	NA	99.7877	4.3116	4.48372	86.8171	9.80674	9.88334	NA	NA	NA	1.14707	NA		99.7877	4.3116	4.32077	4.48372	4.57506
UK012	UK012_493	NA	155	3080	170.1	1.62931	NA	NA	63.7349	4.7442	0.0477	11.4158	NA	NA	0.103191	12.3623	0.01569	4.7442	0.27855	NA	NA	NA	NA	NA	100.359	4.72436	4.88372	99.7178	11.742	11.8254	NA	NA	NA	91.0176	NA		100.359	4.72436	4.70746	4.88372	4.8679
UK012	UK012_35	NA	598	11480	682	1.61995	NA	NA	63.6943	4.16468	0.0536	9.50362	NA	NA	0.116029	10.3761	0.0157	4.16468	-0.25726	NA	NA	NA	NA	NA	100.422	4.14987	4.33064	111.465	10.954	11.0642	NA	NA	NA	8.24734	NA		100.422	4.14987	4.13241	4.33064	4.22932
UK012	UK012_531	NA	263	5020	323	1.18185	NA	NA	63.3312	4.29296	0.0515	12.7556	NA	NA	0.112122	13.4586	0.01579	4.29296	-0.61228	NA	NA	NA	NA	NA	100.994	4.30183	4.47841	107.905	13.7783	13.8609	NA	NA	NA	41.0568	NA		100.994	4.30183	4.25951	4.47841	4.37611
UK012	UK012_219	NA	675	14060	766	1.532	NA	NA	63.2911	3.86068	0.0472	8.39781	NA	NA	0.102825	9.24273	0.0158	3.86068	0.17672	NA	NA	NA	NA	NA	101.057	3.87107	4.06663	99.381	8.75053	8.86139	NA	NA	NA	70.6916	NA		101.057	3.87107	3.83058	4.06663	4.03168
UK012	UK012_423	NA	524	10670	666	1.26616	NA	NA	63.2511	4.23086	0.0482	10.1445	NA	NA	0.10507	10.9914	0.01581	4.23086	0.025753	NA	NA	NA	NA	NA	101.121	4.24489	4.42417	101.446	10.6118	10.707	NA	NA	NA	95.4193	NA		101.121	4.24489	4.19785	4.42417	4.3733
UK012	UK012_180	NA	469	8690	465	1.16541	NA	NA	63.0915	4.12972	0.0505	9.39021	NA	NA	0.110363	10.2582	0.01585	4.12972	-0.03051	NA	NA	NA	NA	NA	101.374	4.15373	4.33768	106.297	10.3532	10.4598	NA	NA	NA	38.3267	NA		101.374	4.15373	4.09742	4.33768	4.24888
UK012	UK012_473	NA	274	5780	318	1.10801	NA	NA	63.0915	4.45229	0.0477	12.2831	NA	NA	0.104243	13.0652	0.01585	4.45229	0.23727	NA	NA	NA	NA	NA	101.374	4.47818	4.64931	100.686	12.5242	12.6039	NA	NA	NA	91.0535	NA		101.374	4.47818	4.41746	4.64931	4.58768
UK012	UK012_102	NA	270	4930	321	0.901685	NA	NA	62.8931	4.64474	0.058	12.0094	NA	NA	0.127153	12.8763	0.0159	4.64474	0.037829	NA	NA	NA	NA	NA	101.692	4.68626	4.85105	121.536	14.7501	14.8467	NA	NA	NA	1.01159	NA		101.692	4.68626	4.6083	4.85105	4.69672
UK012	UK012_58	NA	431	9870	636	0.947839	NA	NA	62.7353	4.18023	0.0454	10.0677	NA	NA	0.0997804	10.9011	0.01594	4.18023	-0.35758	NA	NA	NA	NA	NA	101.945	4.22803	4.41087	96.5737	10.0428	10.1344	NA	NA	NA	37.817	NA		101.945	4.22803	4.14735	4.41087	4.378
UK012	UK012_82	NA	93	1770	116.8	1.97966	NA	NA	62.5	5.07104	0.06	18.5071	NA	NA	0.132365	19.1893	0.016	5.07104	-0.074367	NA	NA	NA	NA	NA	102.326	5.14804	5.30033	126.22	22.7797	22.847	NA	NA	NA	4.61628	NA		102.326	5.14804	5.03101	5.30033	5.10709
UK012	UK012_173	NA	90	1880	98.8	1.51534	NA	NA	62.5	4.49125	0.042	16.2611	NA	NA	0.0926554	16.8699	0.016	4.49125	0.22132	NA	NA	NA	NA	NA	102.326	4.55944	4.73073	89.9739	14.5264	14.5819	NA	NA	NA	8.07817	NA		102.326	4.55944	4.45579	4.73073	4.64093
UK012	UK012_244	NA	121	2190	124.9	2.16464	NA	NA	62.5	5.07104	0.054	14.4776	NA	NA	0.119128	15.34	0.016	5.07104	-0.1043	NA	NA	NA	NA	NA	102.326	5.14804	5.30033	114.281	16.5817	16.6583	NA	NA	NA	18.2831	NA		102.326	5.14804	5.03101	5.30033	5.11433
UK012	UK012_455	NA	184	3970	216.1	1.76121	NA	NA	61.4251	4.66114	0.0462	11.9686	NA	NA	0.103705	12.8442	0.01628	4.66114	-0.069853	NA	NA	NA	NA	NA	104.103	4.81339	4.98149	100.19	12.2547	12.3353	NA	NA	NA	56.0907	NA		104.103	4.81339	4.62371	4.98149	4.81247
UK012	UK012_203	NA	285	6730	352	1.11041	NA	NA	61.2745	4.31962	0.042	10.8029	NA	NA	0.0945085	11.6345	0.01632	4.31962	-0.31412	NA	NA	NA	NA	NA	104.356	4.4715	4.65283	91.6945	10.2011	10.2828	NA	NA	NA	3.97029	NA		104.356	4.4715	4.28484	4.65283	4.58457
UK012	UK012_217	NA	671	13280	689.7	1.22071	NA	NA	61.0874	4.59804	0.0503	8.77772	NA	NA	0.113532	9.9091	0.01637	4.59804	0.35257	NA	NA	NA	NA	NA	104.673	4.77406	4.94531	109.191	10.2587	10.3719	NA	NA	NA	35.1014	NA		104.673	4.77406	4.56091	4.94531	4.71273
UK012	UK012_338	NA	122	2330	137.3	1.10905	NA	NA	60.9756	5.01481	0.049	15.3554	NA	NA	0.1108	16.1535	0.0164	5.01481	0.10449	NA	NA	NA	NA	NA	104.864	5.21618	5.37392	106.697	16.3621	16.4303	NA	NA	NA	82.5753	NA		104.864	5.21618	4.97425	5.37392	5.11878
UK012	UK012_563	NA	216	4160	286.7	0.988621	NA	NA	60.4961	4.39879	0.0537	12.612	NA	NA	0.122391	13.3571	0.01653	4.39879	-0.21798	NA	NA	NA	NA	NA	105.688	4.61109	4.79154	117.237	14.7903	14.8803	NA	NA	NA	16.1371	NA		105.688	4.61109	4.36293	4.79154	4.46883
UK012	UK012_132	NA	419	9710	563	2.99468	NA	NA	60.3136	3.94261	0.0456	10.4928	NA	NA	0.104244	11.2091	0.01658	3.94261	0.10871	NA	NA	NA	NA	NA	106.005	4.14519	4.34619	100.686	10.7449	10.8376	NA	NA	NA	33.6332	NA		106.005	4.14519	3.91037	4.34619	4.12091
UK012	UK012_90	NA	382	7970	506	1.75451	NA	NA	60.2773	4.14768	0.0527	10.9571	NA	NA	0.120548	11.7159	0.01659	4.14768	-0.51912	NA	NA	NA	NA	NA	106.069	4.36339	4.55499	115.568	12.7984	12.8996	NA	NA	NA	22.2185	NA		106.069	4.36339	4.11375	4.55499	4.21936
UK012	UK012_292	NA	325	6550	339.5	0.822034	NA	NA	60.0962	4.69705	0.049	12.824	NA	NA	0.112422	13.6571	0.01664	4.69705	-0.042504	NA	NA	NA	NA	NA	106.386	4.95598	5.12647	108.178	14.0152	14.0968	NA	NA	NA	81.197	NA		106.386	4.95598	4.65851	5.12647	4.80895
UK012	UK012_70	NA	118	2400	151.7	1.43791	NA	NA	59.8802	5.83394	0.054	15.9554	NA	NA	0.12434	16.9885	0.0167	5.83394	0.51825	NA	NA	NA	NA	NA	106.766	6.17738	6.31594	118.999	19.0788	19.1506	NA	NA	NA	14.6485	NA		106.766	6.17738	5.7859	6.31594	5.97243
UK012	UK012_77	NA	98	2260	139.5	1.16639	NA	NA	59.8802	5.38842	0.042	16.1974	NA	NA	0.096709	17.0702	0.0167	5.38842	-0.40562	NA	NA	NA	NA	NA	106.766	5.70563	5.85537	93.734	15.2854	15.3424	NA	NA	NA	15.3939	NA		106.766	5.70563	5.34405	5.85537	5.62369
UK012	UK012_393	NA	145	2930	188.8	1.30748	NA	NA	59.5238	4.96198	0.049	13.6504	NA	NA	0.113503	14.5242	0.0168	4.96198	0.36243	NA	NA	NA	NA	NA	107.4	5.28503	5.44822	109.165	15.0339	15.1113	NA	NA	NA	80.1321	NA		107.4	5.28503	4.92088	5.44822	5.07321
UK012	UK012_123	NA	444	8200	465	1.30986	NA	NA	59.4884	4.31765	0.0517	9.58618	NA	NA	0.119828	10.5137	0.01681	4.31765	-0.18623	NA	NA	NA	NA	NA	107.464	4.60144	4.7882	114.916	11.4238	11.5358	NA	NA	NA	25.5839	NA		107.464	4.60144	4.28186	4.7882	4.40079
UK012	UK012_459	NA	699	15320	810	0.966587	NA	NA	59.4884	3.97629	0.0456	8.82623	NA	NA	0.10569	9.68056	0.01681	3.97629	0.20632	NA	NA	NA	NA	NA	107.464	4.23764	4.43974	102.015	9.39601	9.50457	NA	NA	NA	24.9198	NA		107.464	4.23764	3.94333	4.43974	4.15448
UK012	UK012_583	NA	324	5560	384	1.58025	NA	NA	59.1017	4.35546	0.0554	9.75564	NA	NA	0.129244	10.6838	0.01692	4.35546	-0.12597	NA	NA	NA	NA	NA	108.161	4.6716	4.858	123.418	12.4165	12.5344	NA	NA	NA	2.79119	NA		108.161	4.6716	4.31913	4.858	4.3979
UK012	UK012_351	NA	32	800	47.4	1.58	NA	NA	58.8235	7.71521	0.04	25.0396	NA	NA	0.0937584	26.2012	0.017	7.71521	-0.40799	NA	NA	NA	NA	NA	108.668	8.3137	8.42083	90.9985	22.8094	22.8456	NA	NA	NA	19.262	NA		108.668	8.3137	7.65055	8.42083	8.00804
UK012	UK012_372	NA	606	11760	727	1.96486	NA	NA	58.309	4.32532	0.0538	9.65148	NA	NA	0.127218	10.5764	0.01715	4.32532	0.22862	NA	NA	NA	NA	NA	109.619	4.70127	4.89142	121.595	12.1207	12.2381	NA	NA	NA	4.62625	NA		109.619	4.70127	4.28875	4.89142	4.43244
UK012	UK012_74	NA	80	1840	111.3	1.50202	NA	NA	58.1395	4.91229	0.045	19.319	NA	NA	0.106719	19.9337	0.0172	4.91229	-0.10201	NA	NA	NA	NA	NA	109.936	5.35456	5.52321	102.96	19.5199	19.5733	NA	NA	NA	50.0316	NA		109.936	5.35456	4.87064	5.52321	5.05352
UK012	UK012_501	NA	184	4190	205	1.76117	NA	NA	57.1755	4.49999	0.0475	12.6194	NA	NA	0.114547	13.3977	0.01749	4.49999	0.027191	NA	NA	NA	NA	NA	111.773	4.98642	5.17303	110.117	13.9822	14.0667	NA	NA	NA	82.1748	NA		111.773	4.98642	4.4612	5.17303	4.63546
UK012	UK012_536	NA	121	2900	164.8	1.35638	NA	NA	56.4972	5.03898	0.043	14.8763	NA	NA	0.10494	15.7065	0.0177	5.03898	0.19102	NA	NA	NA	NA	NA	113.103	5.64956	5.81879	101.327	15.1477	15.2144	NA	NA	NA	11.7456	NA		113.103	5.64956	4.99503	5.81879	5.1824
UK012	UK012_416	NA	101	2240	129	1.067	NA	NA	56.1798	5.02624	0.0435	12.3889	NA	NA	0.10676	13.3697	0.0178	5.02624	-0.18896	NA	NA	NA	NA	NA	113.737	5.66655	5.83715	102.998	13.0958	13.1754	NA	NA	NA	15.6782	NA		113.737	5.66655	4.98216	5.83715	5.2313
UK012	UK012_361	NA	596	11880	693	2.09366	NA	NA	55.9597	3.92276	0.0517	8.48281	NA	NA	0.127384	9.34591	0.01787	3.92276	0.39276	NA	NA	NA	NA	NA	114.18	4.43959	4.65699	121.745	10.7229	10.8558	NA	NA	NA	12.6451	NA		114.18	4.43959	3.88823	4.65699	4.07623
UK012	UK012_81	NA	287	5750	335.8	2.13206	NA	NA	55.8659	4.83214	0.0525	11.5254	NA	NA	0.129573	12.4974	0.0179	4.83214	0.11522	NA	NA	NA	NA	NA	114.37	5.4778	5.65601	123.714	14.5572	14.6584	NA	NA	NA	21.3055	NA		114.37	5.4778	4.78953	5.65601	4.90857
UK012	UK012_520	NA	1052	20050	1056	1.02227	NA	NA	55.6793	4.04563	0.0501	7.87515	NA	NA	0.124064	8.85354	0.01796	4.04563	0.11185	NA	NA	NA	NA	NA	114.75	4.6013	4.81344	118.75	9.92236	10.0593	NA	NA	NA	44.5083	NA		114.75	4.6013	4.00984	4.81344	4.17347
UK012	UK012_506	NA	191	3150	160.6	1.62222	NA	NA	55.5864	4.5866	0.059	13.4118	NA	NA	0.146347	14.1744	0.01799	4.5866	-0.33248	NA	NA	NA	NA	NA	114.94	5.22512	5.41348	138.682	18.3759	18.4753	NA	NA	NA	2.30021	NA		114.94	5.22512	4.54595	5.41348	4.58114
UK012	UK012_128	NA	401	7720	398	1.54623	NA	NA	54.7345	4.23339	0.0513	9.75313	NA	NA	0.129228	10.6323	0.01827	4.23339	0.13049	NA	NA	NA	NA	NA	116.713	4.89646	5.10303	123.404	12.3553	12.4738	NA	NA	NA	29.2618	NA		116.713	4.89646	4.1953	5.10303	4.34764
UK012	UK012_379	NA	136	2890	173.1	1.50653	NA	NA	54.3478	4.95349	0.05	14.3018	NA	NA	0.12685	15.1353	0.0184	4.95349	0.41911	NA	NA	NA	NA	NA	117.536	5.76938	5.94813	121.263	17.3016	17.3837	NA	NA	NA	63.7264	NA		117.536	5.76938	4.90861	5.94813	5.06627
UK012	UK012_370	NA	534	10380	600	1.2474	NA	NA	53.6481	4.16633	0.0529	9.63962	NA	NA	0.135957	10.5015	0.01864	4.16633	-0.14901	NA	NA	NA	NA	NA	119.055	4.9147	5.12862	129.437	12.7627	12.8881	NA	NA	NA	14.9158	NA		119.055	4.9147	4.12809	5.12862	4.24797
UK012	UK012_564	NA	347	7730	460	1.85036	NA	NA	53.6481	4.14287	0.0456	10.2967	NA	NA	0.117196	11.0989	0.01864	4.14287	-0.044984	NA	NA	NA	NA	NA	119.055	4.88703	5.10211	112.527	11.8226	11.9267	NA	NA	NA	31.3875	NA		119.055	4.88703	4.10485	5.10211	4.32293
UK012	UK012_85	NA	132	2480	135.8	1.52242	NA	NA	53.1915	4.90828	0.0574	12.0228	NA	NA	0.148789	12.9861	0.0188	4.90828	0.32676	NA	NA	NA	NA	NA	120.067	5.8387	6.0229	140.842	17.0797	17.1896	NA	NA	NA	1.08352	NA		120.067	5.8387	4.86285	6.0229	5.01356
UK012	UK012_345	NA	2520	47200	2446	6.71978	NA	NA	52.521	3.95771	0.0535	7.23438	NA	NA	0.14045	8.24619	0.01904	3.95771	-0.24778	NA	NA	NA	NA	NA	121.586	4.76692	4.99635	133.445	10.312	10.4759	NA	NA	NA	5.63541	NA		121.586	4.76692	3.92062	4.99635	4.02077
UK012	UK012_258	NA	454	9430	422.1	0.970345	NA	NA	51.8941	4.0857	0.0469	8.66813	NA	NA	0.124611	9.58277	0.01927	4.0857	0.31131	NA	NA	NA	NA	NA	123.041	4.9794	5.20459	119.244	10.7818	10.9089	NA	NA	NA	46.3406	NA		123.041	4.9794	4.04695	5.20459	4.23992
UK012	UK012_204	NA	332	6710	296.8	1.18059	NA	NA	51.8403	4.17316	0.0503	10.2145	NA	NA	0.133783	11.0341	0.01929	4.17316	0.44557	NA	NA	NA	NA	NA	123.167	5.09118	5.31207	127.491	13.2209	13.3387	NA	NA	NA	46.6955	NA		123.167	5.09118	4.13355	5.31207	4.31739
UK012	UK012_400	NA	309	5610	299.9	0.78099	NA	NA	51.7598	4.46843	0.0557	10.9738	NA	NA	0.148376	11.8487	0.01932	4.46843	0.046179	NA	NA	NA	NA	NA	123.357	5.45971	5.66687	140.477	15.5458	15.666	NA	NA	NA	3.62149	NA		123.357	5.45971	4.42594	5.66687	4.53352
UK012	UK012_359	NA	388	7980	421.1	0.807943	NA	NA	51.0986	3.8281	0.0491	9.92918	NA	NA	0.132487	10.6416	0.01957	3.8281	0.049784	NA	NA	NA	NA	NA	124.938	4.73669	4.97998	126.33	12.6415	12.7625	NA	NA	NA	83.3956	NA		124.938	4.73669	3.79124	4.97998	3.98108
UK012	UK012_172	NA	330	6230	265.5	1.32024	NA	NA	50.2513	4.25108	0.0496	9.53475	NA	NA	0.136093	10.4395	0.0199	4.25108	0.14487	NA	NA	NA	NA	NA	127.024	5.34704	5.57078	129.558	12.6986	12.8248	NA	NA	NA	69.7897	NA		127.024	5.34704	4.20947	5.57078	4.37603
UK012	UK012_99	NA	195	4360	231.5	1.33353	NA	NA	50.226	4.34992	0.0482	13.0827	NA	NA	0.132318	13.7869	0.01991	4.34992	-0.0071683	NA	NA	NA	NA	NA	127.087	5.47406	5.69302	126.179	16.3601	16.4536	NA	NA	NA	91.6265	NA		127.087	5.47406	4.30733	5.69302	4.4829
UK012	UK012_538	NA	416	9020	464	1.20238	NA	NA	50.0751	4.32113	0.0473	10.6136	NA	NA	0.130239	11.4596	0.01997	4.32113	0.24245	NA	NA	NA	NA	NA	127.466	5.45389	5.67491	124.312	13.4089	13.5197	NA	NA	NA	63.2102	NA		127.466	5.45389	4.27869	5.67491	4.45976
UK012	UK012_38	NA	282	4920	245	1.18357	NA	NA	49.95	4.46238	0.0552	9.89227	NA	NA	0.152372	10.8522	0.02002	4.46238	0.16426	NA	NA	NA	NA	NA	127.782	5.646	5.8608	144.004	14.571	14.7051	NA	NA	NA	2.87436	NA		127.782	5.646	4.41845	5.8608	4.53932
UK012	UK012_570	NA	406	8490	484.1	1.02781	NA	NA	49.9251	4.10075	0.0506	11.2648	NA	NA	0.139744	11.988	0.02003	4.10075	0.30768	NA	NA	NA	NA	NA	127.846	5.19098	5.42406	132.816	14.9257	15.0384	NA	NA	NA	48.5356	NA		127.846	5.19098	4.06036	5.42406	4.24024
UK012	UK012_215	NA	281	5550	236.2	1.91255	NA	NA	49.9002	4.35528	0.0484	11.5107	NA	NA	0.133735	12.3071	0.02004	4.35528	-0.12197	NA	NA	NA	NA	NA	127.909	5.51588	5.73598	127.448	14.7418	14.8474	NA	NA	NA	95.5081	NA		127.909	5.51588	4.31236	5.73598	4.48687
UK012	UK012_303	NA	996	19150	804	1.0242	NA	NA	49.554	4.0004	0.0507	7.90096	NA	NA	0.141069	8.85598	0.02018	4.0004	0.45669	NA	NA	NA	NA	NA	128.793	5.10113	5.34155	133.995	11.1174	11.2707	NA	NA	NA	29.4064	NA		128.793	5.10113	3.96071	5.34155	4.14739
UK012	UK012_558	NA	251	4760	263.2	1.32394	NA	NA	49.4805	4.2132	0.0554	11.3493	NA	NA	0.154375	12.1061	0.02021	4.2132	-0.025178	NA	NA	NA	NA	NA	128.983	5.3803	5.60942	145.768	16.44	16.5617	NA	NA	NA	5.56545	NA		128.983	5.3803	4.17133	5.60942	4.2927
UK012	UK012_451	NA	318	6960	304.9	1.46657	NA	NA	49.14	4.04138	0.0458	9.90631	NA	NA	0.128508	10.699	0.02035	4.04138	0.28447	NA	NA	NA	NA	NA	129.868	5.19593	5.43598	122.756	12.3714	12.4886	NA	NA	NA	23.3627	NA		129.868	5.19593	4.00095	5.43598	4.20008
UK012	UK012_331	NA	219	4700	217.3	1.36753	NA	NA	49.0196	4.74997	0.046	13.8506	NA	NA	0.129387	14.6425	0.0204	4.74997	-0.035822	NA	NA	NA	NA	NA	130.183	6.12166	6.32766	123.546	17.0346	17.1209	NA	NA	NA	46.7232	NA		130.183	6.12166	4.70233	6.32766	4.89146
UK012	UK012_526	NA	292	6140	296	1.184	NA	NA	48.852	4.36874	0.05	12.9761	NA	NA	0.14112	13.6918	0.02047	4.36874	-0.13289	NA	NA	NA	NA	NA	130.626	5.64927	5.87334	134.041	17.1945	17.2941	NA	NA	NA	71.6648	NA		130.626	5.64927	4.32478	5.87334	4.48149
UK012	UK012_45	NA	704	13000	634	1.7809	NA	NA	48.8281	4.08551	0.055	9.92382	NA	NA	0.155308	10.7319	0.02048	4.08551	0.17268	NA	NA	NA	NA	NA	130.689	5.28555	5.52461	146.588	14.6498	14.7877	NA	NA	NA	3.15584	NA		130.689	5.28555	4.04438	5.52461	4.19403
UK012	UK012_192	NA	200	3800	156.3	1.93201	NA	NA	48.5437	5.21043	0.052	12.9628	NA	NA	0.147697	13.9708	0.0206	5.21043	0.23911	NA	NA	NA	NA	NA	131.447	6.77959	6.96971	139.877	18.2576	18.3592	NA	NA	NA	34.7789	NA		131.447	6.77959	5.15767	6.96971	5.28541
UK012	UK012_324	NA	471	9480	415.8	1.04211	NA	NA	48.4731	4.08064	0.046	11.1857	NA	NA	0.130845	11.9068	0.02063	4.08064	-0.28563	NA	NA	NA	NA	NA	131.636	5.31714	5.55818	124.857	13.9897	14.0968	NA	NA	NA	40.5155	NA		131.636	5.31714	4.03926	5.55818	4.26337
UK012	UK012_93	NA	1632	32900	1684	0.776037	NA	NA	48.4262	3.9177	0.0524	7.28731	NA	NA	0.149194	8.27364	0.02065	3.9177	-0.10828	NA	NA	NA	NA	NA	131.763	5.10966	5.36051	141.2	10.9069	11.0791	NA	NA	NA	13.3245	NA		131.763	5.10966	3.87793	5.36051	4.01001
UK012	UK012_426	NA	930	18500	871	0.712766	NA	NA	48.4027	4.07002	0.0494	8.39814	NA	NA	0.140721	9.3324	0.02066	4.07002	0.54272	NA	NA	NA	NA	NA	131.826	5.31085	5.55284	133.686	11.6902	11.8355	NA	NA	NA	70.6613	NA		131.826	5.31085	4.02869	5.55284	4.21564
UK012	UK012_138	NA	232	4780	213.1	1.31706	NA	NA	48.1928	3.93828	0.0485	12.3022	NA	NA	0.138759	12.9172	0.02075	3.93828	0.1385	NA	NA	NA	NA	NA	132.394	5.16088	5.41167	131.938	15.9832	16.0872	NA	NA	NA	95.479	NA		132.394	5.16088	3.89812	5.41167	4.08837
UK012	UK012_483	NA	279	5870	237	2.04663	NA	NA	47.3934	4.09459	0.0461	12.1814	NA	NA	0.134117	12.8512	0.0211	4.09459	0.41074	NA	NA	NA	NA	NA	134.604	5.45435	5.69998	127.791	15.4324	15.5338	NA	NA	NA	33.2013	NA		134.604	5.45435	4.05214	5.69998	4.22963
UK012	UK012_418	NA	423	8330	400	1.5748	NA	NA	46.9263	4.19919	0.0489	9.57422	NA	NA	0.143679	10.4546	0.02131	4.19919	0.03435	NA	NA	NA	NA	NA	135.93	5.6482	5.89029	136.316	13.3368	13.4691	NA	NA	NA	95.6997	NA		135.93	5.6482	4.15523	5.89029	4.33157
UK012	UK012_188	NA	1220	22860	911	1.12054	NA	NA	46.6636	3.96332	0.0496	8.57992	NA	NA	0.146557	9.45108	0.02143	3.96332	-0.30516	NA	NA	NA	NA	NA	136.687	5.36033	5.6176	138.867	12.2671	12.4158	NA	NA	NA	76.8626	NA		136.687	5.36033	3.9216	5.6176	4.09531
UK012	UK012_36	NA	680	11670	516	1.27723	NA	NA	46.4468	4.37096	0.056	9.98891	NA	NA	0.166239	10.9034	0.02153	4.37096	0.32168	NA	NA	NA	NA	NA	137.318	5.93866	6.17396	156.15	15.7824	15.9263	NA	NA	NA	1.26254	NA		137.318	5.93866	4.32474	6.17396	4.48389
UK012	UK012_288	NA	826	17580	700	4.64191	NA	NA	45.6413	4.20641	0.0476	9.38524	NA	NA	0.143797	10.2848	0.02191	4.20641	-0.15092	NA	NA	NA	NA	NA	139.716	5.8138	6.06216	136.42	13.1296	13.2641	NA	NA	NA	66.2986	NA		139.716	5.8138	4.16116	6.06216	4.3593
UK012	UK012_207	NA	1323	24660	992	1.05644	NA	NA	45.5789	4.17427	0.0512	7.52595	NA	NA	0.154884	8.60607	0.02194	4.17427	0.16723	NA	NA	NA	NA	NA	139.905	5.7771	6.02763	146.215	11.7199	11.891	NA	NA	NA	30.0747	NA		139.905	5.7771	4.1293	6.02763	4.2799
UK012	UK012_229	NA	483	8460	340	1.49319	NA	NA	45.2489	4.61386	0.0565	10.8615	NA	NA	0.172164	11.8009	0.0221	4.61386	-0.278	NA	NA	NA	NA	NA	140.914	6.43105	6.66019	161.295	17.6012	17.7383	NA	NA	NA	4.66225	NA		140.914	6.43105	4.5638	6.66019	4.61072
UK012	UK012_456	NA	256	4380	174.6	1.61368	NA	NA	45.0857	4.20592	0.058	14.0102	NA	NA	0.177374	14.6279	0.02218	4.20592	0.20148	NA	NA	NA	NA	NA	141.419	5.8832	6.13458	165.799	22.3799	22.4935	NA	NA	NA	2.81836	NA		141.419	5.8832	4.16013	6.13458	4.32675
UK012	UK012_620	NA	1930	37940	1904	1.06072	NA	NA	45.0857	3.88748	0.0514	7.26843	NA	NA	0.15719	8.24272	0.02218	3.88748	0.33991	NA	NA	NA	NA	NA	141.419	5.43777	5.70879	148.241	11.3695	11.5503	NA	NA	NA	20.8086	NA		141.419	5.43777	3.84515	5.70879	4.02292
UK012	UK012_596	NA	2200	42540	2185	1.39083	NA	NA	44.9236	3.83545	0.0482	7.42922	NA	NA	0.147936	8.36086	0.02226	3.83545	-0.14513	NA	NA	NA	NA	NA	141.923	5.38391	5.65941	140.088	10.9409	11.1101	NA	NA	NA	77.5426	NA		141.923	5.38391	3.79354	5.65941	3.99938
UK012	UK012_510	NA	978	18660	762	1.28499	NA	NA	44.6828	4.17782	0.0484	7.64482	NA	NA	0.149351	8.71191	0.02238	4.17782	0.11094	NA	NA	NA	NA	NA	142.68	5.89543	6.15066	141.338	11.4952	11.659	NA	NA	NA	82.7532	NA		142.68	5.89543	4.13192	6.15066	4.3181
UK012	UK012_486	NA	1064	19000	742	1.36648	NA	NA	44.6628	3.87264	0.052	7.72403	NA	NA	0.160531	8.64048	0.02239	3.87264	0.10976	NA	NA	NA	NA	NA	142.743	5.46717	5.74171	151.168	12.1364	12.3122	NA	NA	NA	18.7736	NA		142.743	5.46717	3.83008	5.74171	3.99005
UK012	UK012_395	NA	390	7470	344	2.29181	NA	NA	44.3656	4.04325	0.0517	9.3299	NA	NA	0.160674	10.1683	0.02254	4.04325	-0.0070425	NA	NA	NA	NA	NA	143.689	5.74543	6.01062	151.293	14.2937	14.4435	NA	NA	NA	32.6014	NA		143.689	5.74543	3.99852	6.01062	4.15239
UK012	UK012_500	NA	768	15170	578	2.29365	NA	NA	44.3066	3.95574	0.0478	8.52114	NA	NA	0.148751	9.39456	0.02257	3.95574	-0.21181	NA	NA	NA	NA	NA	143.878	5.62839	5.89954	140.809	12.3527	12.5042	NA	NA	NA	67.4278	NA		143.878	5.62839	3.91192	5.89954	4.1195
UK012	UK012_491	NA	1030	17910	655	0.973254	NA	NA	43.7637	3.97984	0.055	9.35395	NA	NA	0.173281	10.1654	0.02285	3.97984	0.12068	NA	NA	NA	NA	NA	145.643	5.73137	6.00422	162.262	15.2453	15.4051	NA	NA	NA	3.4608	NA		145.643	5.73137	3.93522	6.00422	4.08119
UK012	UK012_15	NA	1209	24760	905	1.07355	NA	NA	43.7445	3.95748	0.0478	7.56373	NA	NA	0.150663	8.53649	0.02286	3.95748	-0.11542	NA	NA	NA	NA	NA	145.706	5.70161	5.97605	142.497	11.3497	11.5181	NA	NA	NA	62.8457	NA		145.706	5.70161	3.91309	5.97605	4.12209
UK012	UK012_125	NA	2820	54700	2271	2.39053	NA	NA	43.4972	3.92731	0.0519	6.42697	NA	NA	0.164516	7.53191	0.02299	3.92731	0.24732	NA	NA	NA	NA	NA	146.525	5.68958	5.96757	154.648	10.8047	11.0102	NA	NA	NA	13.7056	NA		146.525	5.68958	3.88301	5.96757	4.04082
UK012	UK012_242	NA	275	4770	187.5	1.80115	NA	NA	43.4783	4.95349	0.0557	11.1281	NA	NA	0.176638	12.1808	0.023	4.95349	0.0299	NA	NA	NA	NA	NA	146.588	7.1793	7.40173	165.164	18.5693	18.7051	NA	NA	NA	6.11988	NA		146.588	7.1793	4.8976	7.40173	4.97391
UK012	UK012_316	NA	2380	47100	1795	1.00335	NA	NA	43.3839	3.86497	0.0485	6.92773	NA	NA	0.154139	7.93294	0.02305	3.86497	0.27579	NA	NA	NA	NA	NA	146.903	5.61357	5.89654	145.56	10.7581	10.9427	NA	NA	NA	80.1229	NA		146.903	5.61357	3.82127	5.89654	4.0187
UK012	UK012_445	NA	5070	99730	3880	1.7963	NA	NA	43.3463	3.78327	0.0504	6.03992	NA	NA	0.160317	7.12698	0.02307	3.78327	0.46574	NA	NA	NA	NA	NA	147.029	5.49956	5.78859	150.981	9.99889	10.211	NA	NA	NA	37.4756	NA		147.029	5.49956	3.74045	5.78859	3.93099
UK012	UK012_261	NA	482	9490	348	3.03665	NA	NA	43.2339	4.1231	0.0531	10.551	NA	NA	0.169345	11.328	0.02313	4.1231	-0.37561	NA	NA	NA	NA	NA	147.407	6.00879	6.27573	158.85	16.6591	16.7999	NA	NA	NA	24.7509	NA		147.407	6.00879	4.07632	6.27573	4.19607
UK012	UK012_553	NA	1222	23940	1107	1.66466	NA	NA	43.1965	3.99627	0.0534	7.69568	NA	NA	0.170449	8.67143	0.02315	3.99627	0.074767	NA	NA	NA	NA	NA	147.533	5.82888	6.10415	159.808	12.8229	13.0073	NA	NA	NA	7.40191	NA		147.533	5.82888	3.95089	6.10415	4.08671
UK012	UK012_479	NA	330	6330	239.5	2.10827	NA	NA	42.9	3.97786	0.0531	9.37089	NA	NA	0.170662	10.1802	0.02331	3.97786	0.27192	NA	NA	NA	NA	NA	148.541	5.84121	6.11956	159.994	15.0704	15.228	NA	NA	NA	11.8718	NA		148.541	5.84121	3.93238	6.11956	4.10528
UK012	UK012_541	NA	3910	79700	3630	2.64	NA	NA	42.8449	3.88446	0.0509	6.35523	NA	NA	0.163802	7.44836	0.02334	3.88446	0.14732	NA	NA	NA	NA	NA	148.73	5.71124	5.99632	154.026	10.645	10.852	NA	NA	NA	35.0053	NA		148.73	5.71124	3.83999	5.99632	4.0055
UK012	UK012_133	NA	630	12730	510	1.84783	NA	NA	42.6803	4.07868	0.0494	8.51792	NA	NA	0.159588	9.44408	0.02343	4.07868	0.40181	NA	NA	NA	NA	NA	149.297	6.01938	6.29252	150.343	13.1981	13.3583	NA	NA	NA	86.296	NA		149.297	6.01938	4.03181	6.29252	4.2139
UK012	UK012_626	NA	1050	22400	1052	0.79697	NA	NA	42.6076	4.05237	0.0477	8.01048	NA	NA	0.154359	8.97716	0.02347	4.05237	0.079935	NA	NA	NA	NA	NA	149.549	5.99053	6.26582	145.754	12.1894	12.353	NA	NA	NA	56.3103	NA		149.549	5.99053	4.00572	6.26582	4.20847
UK012	UK012_577	NA	970	17190	853	1.14037	NA	NA	42.4809	3.93834	0.0545	8.15154	NA	NA	0.17689	9.05307	0.02354	3.93834	-0.045446	NA	NA	NA	NA	NA	149.99	5.83893	6.12265	165.381	13.8172	13.9996	NA	NA	NA	4.4547	NA		149.99	5.83893	3.89288	6.12265	4.01607
UK012	UK012_86	NA	315	6050	276	2.20977	NA	NA	42.1941	4.50887	0.0539	11.3733	NA	NA	0.176132	12.2344	0.0237	4.50887	0.1523	NA	NA	NA	NA	NA	150.998	6.72918	6.98003	164.727	18.6056	18.7405	NA	NA	NA	14.6361	NA		150.998	6.72918	4.45648	6.98003	4.59244
UK012	UK012_471	NA	2620	51160	1873	0.7583	NA	NA	42.0875	3.84711	0.051	7.14945	NA	NA	0.167077	8.11879	0.02376	3.84711	-0.3274	NA	NA	NA	NA	NA	151.375	5.75574	6.04852	156.879	11.8021	11.9955	NA	NA	NA	45.5448	NA		151.375	5.75574	3.80229	6.04852	3.95907
UK012	UK012_339	NA	2710	53270	2150	1.771	NA	NA	41.9639	3.82273	0.0499	6.71763	NA	NA	0.163955	7.72916	0.02383	3.82273	0.4178	NA	NA	NA	NA	NA	151.816	5.73572	6.03113	154.16	11.0553	11.255	NA	NA	NA	64.3151	NA		151.816	5.73572	3.77807	6.03113	3.96885
UK012	UK012_314	NA	1530	31280	1145	1.63105	NA	NA	41.6667	3.99315	0.047	7.6925	NA	NA	0.155529	8.66716	0.024	3.99315	0.33312	NA	NA	NA	NA	NA	152.887	6.03316	6.31852	146.782	11.8456	12.0161	NA	NA	NA	28.1369	NA		152.887	6.03316	3.94617	6.31852	4.14927
UK012	UK012_156	NA	962	19490	737	1.20425	NA	NA	41.6493	3.88771	0.0483	8.59677	NA	NA	0.159897	9.43498	0.02401	3.88771	0.27863	NA	NA	NA	NA	NA	152.95	5.87624	6.16909	150.613	13.2074	13.368	NA	NA	NA	71.633	NA		152.95	5.87624	3.84195	6.16909	4.03825
UK012	UK012_248	NA	1086	19120	683	0.945983	NA	NA	41.6493	3.96428	0.0555	8.30438	NA	NA	0.183733	9.20208	0.02401	3.96428	-0.083098	NA	NA	NA	NA	NA	152.95	5.99198	6.27944	171.267	14.5037	14.689	NA	NA	NA	2.41361	NA		152.95	5.99198	3.91762	6.27944	4.02711
UK012	UK012_474	NA	4100	77040	2759	1.117	NA	NA	40.8831	3.827	0.0523	6.14075	NA	NA	0.176384	7.23565	0.02446	3.827	0.40946	NA	NA	NA	NA	NA	155.782	5.89031	6.19302	164.944	11.0163	11.2431	NA	NA	NA	7.19356	NA		155.782	5.89031	3.78113	6.19302	3.95778
UK012	UK012_47	NA	2130	40300	1650	5.32258	NA	NA	40.7997	3.96201	0.053	7.19196	NA	NA	0.17911	8.21108	0.02451	3.96201	-0.028184	NA	NA	NA	NA	NA	156.096	6.11028	6.40374	167.295	12.6654	12.8684	NA	NA	NA	11.6443	NA		156.096	6.11028	3.91443	6.40374	4.04627
UK012	UK012_511	NA	5800	112700	4150	1.57495	NA	NA	40.4694	3.83873	0.0478	5.76835	NA	NA	0.162855	6.9289	0.02471	3.83873	0.16722	NA	NA	NA	NA	NA	157.355	5.9673	6.27213	153.199	9.85336	10.0744	NA	NA	NA	43.3843	NA		157.355	5.9673	3.79226	6.27213	4.01026
UK012	UK012_108	NA	1500	30100	1250	2.39923	NA	NA	40.3877	3.88982	0.0526	7.7412	NA	NA	0.179572	8.66354	0.02476	3.88982	0.41571	NA	NA	NA	NA	NA	157.669	6.05865	6.36027	167.692	13.3926	13.5855	NA	NA	NA	10.1703	NA		157.669	6.05865	3.84264	6.36027	4.02943
UK012	UK012_50	NA	2070	42500	1714	2.05762	NA	NA	40.2739	4.04239	0.0511	8.2437	NA	NA	0.174944	9.18148	0.02483	4.04239	-0.2211	NA	NA	NA	NA	NA	158.11	6.31366	6.60521	163.7	13.882	14.0602	NA	NA	NA	49.7934	NA		158.11	6.31366	3.99322	6.60521	4.14573
UK012	UK012_367	NA	713	13340	579	1.94687	NA	NA	40.1606	4.23821	0.0527	9.36997	NA	NA	0.18093	10.2839	0.0249	4.23821	-0.0081036	NA	NA	NA	NA	NA	158.55	6.63771	6.91711	168.861	15.9997	16.1636	NA	NA	NA	23.6873	NA		158.55	6.63771	4.18651	6.91711	4.32136
UK012	UK012_376	NA	2170	43700	1872	2.99042	NA	NA	39.8883	3.7953	0.051	7.19259	NA	NA	0.176289	8.13251	0.02507	3.7953	0.079364	NA	NA	NA	NA	NA	159.619	5.98364	6.29617	164.862	12.3762	12.5784	NA	NA	NA	43.1644	NA		159.619	5.98364	3.7487	6.29617	3.92287
UK012	UK012_155	NA	1820	35900	1311	1.19726	NA	NA	39.8565	3.91449	0.0486	7.26055	NA	NA	0.168127	8.24856	0.02509	3.91449	0.20793	NA	NA	NA	NA	NA	159.745	6.17635	6.48006	157.792	12.0553	12.2467	NA	NA	NA	75.1684	NA		159.745	6.17635	3.86639	6.48006	4.06391
UK012	UK012_322	NA	720	14000	433	1.64639	NA	NA	35.461	6.34658	0.0505	9.15596	NA	NA	0.196355	11.1405	0.0282	6.34658	0.81091	NA	NA	NA	NA	NA	179.273	11.221	11.434	182.037	18.568	18.7302	NA	NA	NA	63.2117	NA		179.273	11.221	6.25915	11.434	6.41025
UK012	UK012_97	NA	286	5490	165.5	1.04088	NA	NA	28.4091	4.95754	0.0532	11.9168	NA	NA	0.2582	12.9069	0.0352	4.95754	-0.26856	NA	NA	NA	NA	NA	223.011	10.8668	11.203	233.215	26.9004	27.0757	NA	NA	NA	51.9711	NA		223.011	10.8668	4.87277	11.203	4.97895
UK012	UK012_166	NA	2309	40300	991	55.3631	NA	NA	27.933	4.15087	0.0539	6.73553	NA	NA	0.266056	7.91183	0.0358	4.15087	0.36638	NA	NA	NA	NA	NA	226.747	9.24835	9.65385	239.536	16.8837	17.1749	NA	NA	NA	11.178	NA		226.747	9.24835	4.07872	9.65385	4.23216
UK012	UK012_184	NA	916	16620	386.7	0.325505	NA	NA	26.9542	3.9693	0.0529	7.82707	NA	NA	0.270602	8.77602	0.0371	3.9693	-0.094636	NA	NA	NA	NA	NA	234.832	9.15348	9.59151	243.175	18.9801	19.2467	NA	NA	NA	44.5964	NA		234.832	9.15348	3.89788	9.59151	4.05434
UK012	UK012_591	NA	204	4350	125.6	0.709605	NA	NA	25.641	4.38754	0.048	16.0686	NA	NA	0.258111	16.6568	0.039	4.38754	-0.10755	NA	NA	NA	NA	NA	246.632	10.6167	11.0342	233.144	34.712	34.848	NA	NA	NA	46.7961	NA		246.632	10.6167	4.30467	11.0342	4.50118
UK012	UK012_46	NA	2091	40470	1038	0.537824	NA	NA	25.4842	3.88776	0.0525	6.77073	NA	NA	0.284047	7.80753	0.03924	3.88776	0.32986	NA	NA	NA	NA	NA	248.12	9.46305	9.93464	253.863	17.5386	17.8493	NA	NA	NA	49.9233	NA		248.12	9.46305	3.8139	9.93464	3.99294
UK012	UK012_67	NA	1250	26470	707	0.961905	NA	NA	25.4453	3.86357	0.0515	7.78114	NA	NA	0.279062	8.68754	0.0393	3.86357	0.17283	NA	NA	NA	NA	NA	248.493	9.41801	9.8931	249.913	19.2481	19.5239	NA	NA	NA	88.6573	NA		248.493	9.41801	3.79006	9.8931	3.97796
UK012	UK012_482	NA	767	16150	351	0.631295	NA	NA	25.3807	4.03189	0.0469	8.35168	NA	NA	0.254783	9.27398	0.0394	4.03189	0.36504	NA	NA	NA	NA	NA	249.113	9.85236	10.3096	230.454	19.1227	19.3634	NA	NA	NA	3.7032	NA		249.113	9.85236	3.95498	10.3096	4.16749
UK012	UK012_343	NA	952	18910	458	1.33178	NA	NA	24.6305	4.01517	0.0503	7.62762	NA	NA	0.281576	8.61987	0.0406	4.01517	0.81102	NA	NA	NA	NA	NA	256.551	10.0987	10.5712	251.907	19.2324	19.5123	NA	NA	NA	45.6338	NA		256.551	10.0987	3.93632	10.5712	4.09439
UK012	UK012_429	NA	944	18870	445	0.940803	NA	NA	24.4499	3.92872	0.0484	7.88365	NA	NA	0.272942	8.80834	0.0409	3.92872	0.19273	NA	NA	NA	NA	NA	258.409	9.95139	10.4373	245.043	19.1795	19.4469	NA	NA	NA	17.5636	NA		258.409	9.95139	3.85102	10.4373	4.07311
UK012	UK012_406	NA	792	14290	364.8	1.55897	NA	NA	24.0385	4.37499	0.0553	8.65876	NA	NA	0.31719	9.70127	0.0416	4.37499	0.076833	NA	NA	NA	NA	NA	262.743	11.2639	11.7094	279.739	23.7251	23.9982	NA	NA	NA	18.4491	NA		262.743	11.2639	4.28704	11.7094	4.41078
UK012	UK012_336	NA	3150	60700	1399	0.876566	NA	NA	24.0154	3.85557	0.0499	6.28042	NA	NA	0.286492	7.36947	0.04164	3.85557	0.35311	NA	NA	NA	NA	NA	262.99	9.93574	10.439	255.794	16.6652	16.9961	NA	NA	NA	37.0409	NA		262.99	9.93574	3.77798	10.439	3.98655
UK012	UK012_300	NA	978	19170	398	1.18452	NA	NA	23.9234	4.25028	0.0494	8.69588	NA	NA	0.284711	9.67901	0.0418	4.25028	-0.23571	NA	NA	NA	NA	NA	263.981	10.9933	11.4535	254.388	21.7834	22.0353	NA	NA	NA	46.9767	NA		263.981	10.9933	4.16444	11.4535	4.37883
UK012	UK012_12	NA	3860	76800	1499	50.9864	NA	NA	23.7643	3.82821	0.05	6.5406	NA	NA	0.2901	7.57857	0.04208	3.82821	-0.12384	NA	NA	NA	NA	NA	265.713	9.96527	10.4771	258.638	17.3054	17.6306	NA	NA	NA	49.9863	NA		265.713	9.96527	3.75039	10.4771	3.97206
UK012	UK012_608	NA	1580	27700	752	1.18425	NA	NA	23.753	3.89376	0.0553	7.24774	NA	NA	0.321003	8.22746	0.0421	3.89376	0.22815	NA	NA	NA	NA	NA	265.837	10.1405	10.6444	282.673	20.3029	20.6271	NA	NA	NA	10.2901	NA		265.837	10.1405	3.81457	10.6444	3.97177
UK012	UK012_497	NA	507	9100	180.8	1.15897	NA	NA	23.5849	4.1307	0.0524	9.89125	NA	NA	0.306336	10.7191	0.0424	4.1307	0.30022	NA	NA	NA	NA	NA	267.692	10.8311	11.3106	271.337	25.5284	25.7693	NA	NA	NA	76.6875	NA		267.692	10.8311	4.04612	11.3106	4.22199
UK012	UK012_432	NA	1600	30740	681	1.00442	NA	NA	23.4742	4.67435	0.0497	7.37354	NA	NA	0.291922	8.73033	0.0426	4.67435	0.84426	NA	NA	NA	NA	NA	268.929	12.3121	12.7397	260.071	20.0331	20.3174	NA	NA	NA	12.6024	NA		268.929	12.3121	4.57819	12.7397	4.67447
UK012	UK012_405	NA	1305	22190	546	3.71429	NA	NA	23.4632	3.83366	0.0568	7.58994	NA	NA	0.333782	8.50318	0.04262	3.83366	-0.059907	NA	NA	NA	NA	NA	269.053	10.1023	10.6197	292.449	21.61	21.9332	NA	NA	NA	5.69125	NA		269.053	10.1023	3.75477	10.6197	3.88311
UK012	UK012_16	NA	1126	20460	396.6	1.32465	NA	NA	23.31	4.17252	0.0519	7.94255	NA	NA	0.306991	8.97184	0.0429	4.17252	0.091938	NA	NA	NA	NA	NA	270.784	11.0645	11.5447	271.846	21.4008	21.6884	NA	NA	NA	92.6934	NA		270.784	11.0645	4.0861	11.5447	4.26031
UK012	UK012_216	NA	980	18700	369.9	1.76901	NA	NA	23.31	3.91143	0.052	9.24558	NA	NA	0.307583	10.0389	0.0429	3.91143	-0.014601	NA	NA	NA	NA	NA	270.784	10.3722	10.883	272.306	23.9823	24.2402	NA	NA	NA	90.7774	NA		270.784	10.3722	3.83042	10.883	4.01543
UK012	UK012_320	NA	966	16400	339.9	1.06552	NA	NA	23.2829	3.86284	0.056	8.01738	NA	NA	0.331629	8.89944	0.04295	3.86284	-0.11727	NA	NA	NA	NA	NA	271.093	10.2548	10.7723	290.809	22.5078	22.8153	NA	NA	NA	12.88	NA		271.093	10.2548	3.78275	10.7723	3.91796
UK012	UK012_118	NA	1151	25100	589	1.25855	NA	NA	23.2558	3.91063	0.0484	8.28221	NA	NA	0.286956	9.15904	0.043	3.91063	0.15203	NA	NA	NA	NA	NA	271.402	10.3932	10.9052	256.16	20.7392	21.0068	NA	NA	NA	15.8618	NA		271.402	10.3932	3.82945	10.9052	4.05519
UK012	UK012_364	NA	1099	21690	534	0.816514	NA	NA	23.2558	3.85096	0.0523	7.61074	NA	NA	0.310078	8.52955	0.043	3.85096	-0.17356	NA	NA	NA	NA	NA	271.402	10.2346	10.7542	274.242	20.5017	20.8064	NA	NA	NA	81.6433	NA		271.402	10.2346	3.77102	10.7542	3.95272
UK012	UK012_554	NA	1370	25030	638	1.44344	NA	NA	23.2558	4.07257	0.0577	8.37699	NA	NA	0.342094	9.31449	0.043	4.07257	0.41345	NA	NA	NA	NA	NA	271.402	10.8236	11.3162	298.757	24.112	24.4129	NA	NA	NA	1.39564	NA		271.402	10.8236	3.98803	11.3162	4.16421
UK012	UK012_205	NA	678	12880	250.8	1.5568	NA	NA	23.2019	4.16867	0.0526	9.4738	NA	NA	0.312582	10.3504	0.0431	4.16867	-0.38562	NA	NA	NA	NA	NA	272.02	11.1037	11.5865	276.181	25.033	25.2863	NA	NA	NA	78.8924	NA		272.02	11.1037	4.08195	11.5865	4.24394
UK012	UK012_622	NA	343	6380	160.8	1.66805	NA	NA	23.2019	4.02637	0.0571	10.9465	NA	NA	0.339324	11.6635	0.0431	4.02637	-0.17373	NA	NA	NA	NA	NA	272.02	10.7247	11.2238	296.659	30.0134	30.2529	NA	NA	NA	14.5635	NA		272.02	10.7247	3.94261	11.2238	4.07127
UK012	UK012_218	NA	1980	38100	768	1.2288	NA	NA	23.0415	4.06662	0.0508	7.82263	NA	NA	0.303987	8.81652	0.0434	4.06662	-0.10703	NA	NA	NA	NA	NA	273.873	10.9041	11.4018	269.509	20.8723	21.1627	NA	NA	NA	72.197	NA		273.873	10.9041	3.98145	11.4018	4.17903
UK012	UK012_385	NA	603	11860	287.9	1.89159	NA	NA	22.9885	4.11182	0.0522	9.08557	NA	NA	0.313084	9.9727	0.0435	4.11182	0.20629	NA	NA	NA	NA	NA	274.491	11.0497	11.5432	276.569	24.1487	24.4117	NA	NA	NA	86.4849	NA		274.491	11.0497	4.02551	11.5432	4.20174
UK012	UK012_420	NA	1240	21130	506	1.87407	NA	NA	22.9358	4.0637	0.057	7.91252	NA	NA	0.342659	8.89503	0.0436	4.0637	0.488	NA	NA	NA	NA	NA	275.109	10.9444	11.4446	299.185	23.0541	23.3694	NA	NA	NA	1.80662	NA		275.109	10.9444	3.97821	11.4446	4.16552
UK012	UK012_213	NA	1103	21140	413	1.72803	NA	NA	22.8833	4.06226	0.0507	8.82372	NA	NA	0.305486	9.71391	0.0437	4.06226	0.16182	NA	NA	NA	NA	NA	275.727	10.9646	11.4661	270.676	23.0843	23.3493	NA	NA	NA	67.1923	NA		275.727	10.9646	3.97661	11.4661	4.16917
UK012	UK012_628	NA	1330	25000	626	1.59694	NA	NA	22.8833	4.06226	0.0531	7.76927	NA	NA	0.319946	8.76718	0.0437	4.06226	0.39052	NA	NA	NA	NA	NA	275.727	10.9646	11.4661	281.861	21.5812	21.885	NA	NA	NA	54.1152	NA		275.727	10.9646	3.97661	11.4661	4.15225
UK012	UK012_14	NA	679	13030	248.9	1.83015	NA	NA	22.779	3.97578	0.0517	8.85586	NA	NA	0.312937	9.70737	0.0439	3.97578	-0.042051	NA	NA	NA	NA	NA	276.962	10.7782	11.2924	276.455	23.4975	23.7676	NA	NA	NA	96.9176	NA		276.962	10.7782	3.89159	11.2924	4.0786
UK012	UK012_253	NA	2037	36940	714	0.987552	NA	NA	22.779	3.93823	0.0549	6.68213	NA	NA	0.332306	7.75632	0.0439	3.93823	0.068125	NA	NA	NA	NA	NA	276.962	10.6764	11.1952	291.325	19.646	19.9985	NA	NA	NA	18.7681	NA		276.962	10.6764	3.85483	11.1952	3.99896
UK012	UK012_13	NA	1750	33600	624	1.36245	NA	NA	22.6244	4.25157	0.0502	7.20536	NA	NA	0.305934	8.36619	0.0442	4.25157	0.71232	NA	NA	NA	NA	NA	278.814	11.6013	12.0866	271.024	19.903	20.2104	NA	NA	NA	27.0243	NA		278.814	11.6013	4.16094	12.0866	4.31774
UK012	UK012_344	NA	1830	36300	788	0.728281	NA	NA	22.6091	3.89152	0.0508	6.83949	NA	NA	0.3098	7.86909	0.04423	3.89152	0.36239	NA	NA	NA	NA	NA	278.999	10.6257	11.1543	274.026	18.9009	19.2305	NA	NA	NA	58.0156	NA		278.999	10.6257	3.80851	11.1543	4.0069
UK012	UK012_297	NA	1733	32260	618	1.54616	NA	NA	22.4215	3.96849	0.0518	7.1	NA	NA	0.318541	8.13382	0.0446	3.96849	0.36954	NA	NA	NA	NA	NA	281.283	10.9227	11.4456	280.78	19.955	20.2809	NA	NA	NA	95.7479	NA		281.283	10.9227	3.88316	11.4456	4.06985
UK012	UK012_353	NA	252	5120	116.3	1.57162	NA	NA	22.4215	4.29712	0.0478	10.8411	NA	NA	0.293944	11.6617	0.0446	4.29712	0.038007	NA	NA	NA	NA	NA	281.283	11.8272	12.3117	261.659	26.9056	27.1203	NA	NA	NA	17.2519	NA		281.283	11.8272	4.20473	12.3117	4.42509
UK012	UK012_397	NA	3210	59000	1429	1.06166	NA	NA	22.4215	3.93205	0.0539	6.36251	NA	NA	0.331455	7.47947	0.0446	3.93205	0.48666	NA	NA	NA	NA	NA	281.283	10.8224	11.3499	290.676	18.9082	19.2728	NA	NA	NA	25.9565	NA		281.283	10.8224	3.8475	11.3499	4.027
UK012	UK012_310	NA	1239	22800	440	1.78862	NA	NA	22.3714	3.96747	0.0536	7.5191	NA	NA	0.330349	8.50163	0.0447	3.96747	0.339	NA	NA	NA	NA	NA	281.9	10.9433	11.4675	289.833	21.439	21.7597	NA	NA	NA	44.0429	NA		281.9	10.9433	3.88198	11.4675	4.05725
UK012	UK012_436	NA	497	9760	201	1.12416	NA	NA	22.3714	4.40931	0.0486	9.57724	NA	NA	0.299533	10.5435	0.0447	4.40931	-0.45152	NA	NA	NA	NA	NA	281.9	12.162	12.6357	266.036	24.6807	24.9215	NA	NA	NA	32.0395	NA		281.9	12.162	4.3143	12.6357	4.55352
UK012	UK012_137	NA	1220	23420	486	1.42105	NA	NA	22.3214	4.00537	0.0511	8.00692	NA	NA	0.315646	8.95286	0.0448	4.00537	0.42346	NA	NA	NA	NA	NA	282.517	11.0715	11.592	278.548	21.8132	22.1077	NA	NA	NA	68.8576	NA		282.517	11.0715	3.91887	11.592	4.10617
UK012	UK012_225	NA	2480	46860	892	1.02647	NA	NA	22.2717	4.00421	0.0538	6.7833	NA	NA	0.333066	7.87698	0.0449	4.00421	0.17566	NA	NA	NA	NA	NA	283.134	11.0919	11.6137	291.904	19.9859	20.3338	NA	NA	NA	40.6789	NA		283.134	11.0919	3.91755	11.6137	4.07823
UK012	UK012_599	NA	1620	33440	844	2.03865	NA	NA	22.0848	3.84226	0.0459	7.48371	NA	NA	0.286563	8.41242	0.04528	3.84226	-0.26383	NA	NA	NA	NA	NA	285.478	10.7295	11.2766	255.851	19.0279	19.3186	NA	NA	NA	1.35937	NA		285.478	10.7295	3.75843	11.2766	4.07428
UK012	UK012_617	NA	1478	27840	690	1.32948	NA	NA	22.0751	3.96152	0.0523	7.21862	NA	NA	0.326664	8.2342	0.0453	3.96152	0.069307	NA	NA	NA	NA	NA	285.601	11.0672	11.5988	287.016	20.5897	20.9179	NA	NA	NA	90.0823	NA		285.601	11.0672	3.87505	11.5988	4.05704
UK012	UK012_113	NA	1770	32100	695	3.98281	NA	NA	22.0264	4.03907	0.0579	6.71142	NA	NA	0.36244	7.83309	0.0454	4.03907	0.16831	NA	NA	NA	NA	NA	286.218	11.3077	11.8307	314.035	21.1614	21.5338	NA	NA	NA	1.32343	NA		286.218	11.3077	3.95072	11.8307	4.06626
UK012	UK012_208	NA	889	15450	293.2	1.84519	NA	NA	22.0264	4.50965	0.0571	8.5341	NA	NA	0.357432	9.65235	0.0454	4.50965	-0.0016951	NA	NA	NA	NA	NA	286.218	12.6251	13.0956	310.296	25.8126	26.1127	NA	NA	NA	9.64738	NA		286.218	12.6251	4.41101	13.0956	4.50382
UK012	UK012_33	NA	2040	37400	766	2.07027	NA	NA	21.978	4.03779	0.0529	6.95027	NA	NA	0.33187	8.03803	0.0455	4.03779	0.4549	NA	NA	NA	NA	NA	286.835	11.3279	11.8522	290.993	20.3397	20.6798	NA	NA	NA	64.8842	NA		286.835	11.3279	3.94928	11.8522	4.12791
UK012	UK012_505	NA	669	12580	239.5	1.51009	NA	NA	21.978	4.08075	0.0482	10.1717	NA	NA	0.302385	10.9598	0.0455	4.08075	0.47431	NA	NA	NA	NA	NA	286.835	11.4484	11.9674	268.261	25.8431	26.0765	NA	NA	NA	9.94382	NA		286.835	11.4484	3.9913	11.9674	4.16866
UK012	UK012_21	NA	7560	138500	2650	0.981481	NA	NA	21.901	3.8732	0.0536	5.56978	NA	NA	0.337444	6.78411	0.04566	3.8732	0.3832	NA	NA	NA	NA	NA	287.821	10.9027	11.45	295.233	17.3817	17.7883	NA	NA	NA	37.318	NA		287.821	10.9027	3.78801	11.45	3.96135
UK012	UK012_149	NA	445	8930	172.9	0.869281	NA	NA	21.8818	3.99515	0.0488	9.3665	NA	NA	0.307494	10.1829	0.0457	3.99515	-0.20959	NA	NA	NA	NA	NA	288.068	11.2554	11.7872	272.237	24.3211	24.5753	NA	NA	NA	27.0322	NA		288.068	11.2554	3.9072	11.7872	4.14269
UK012	UK012_54	NA	1590	29720	664	1.58246	NA	NA	21.8341	3.92207	0.0587	7.88575	NA	NA	0.370685	8.80725	0.0458	3.92207	0.064246	NA	NA	NA	NA	NA	288.684	11.0726	11.6151	320.161	24.1891	24.5265	NA	NA	NA	1.63998	NA		288.684	11.0726	3.83555	11.6151	3.95843
UK012	UK012_283	NA	1344	25350	487	2.04193	NA	NA	21.8341	3.92207	0.0527	7.59768	NA	NA	0.332795	8.55028	0.0458	3.92207	0.28163	NA	NA	NA	NA	NA	288.684	11.0726	11.6151	291.698	21.6816	22.0022	NA	NA	NA	77.8322	NA		288.684	11.0726	3.83555	11.6151	4.01843
UK012	UK012_354	NA	1283	23840	531	1.66458	NA	NA	21.8341	3.99405	0.0539	7.86058	NA	NA	0.340373	8.8171	0.0458	3.99405	-0.073395	NA	NA	NA	NA	NA	288.684	11.2758	11.8089	297.455	22.7383	23.0547	NA	NA	NA	50.2807	NA		288.684	11.2758	3.90594	11.8089	4.06436
UK012	UK012_22	NA	1017	19660	377	1.15291	NA	NA	21.7865	3.92128	0.0518	7.72689	NA	NA	0.327826	8.66494	0.0459	3.92128	0.40681	NA	NA	NA	NA	NA	289.301	11.0935	11.6371	287.905	21.7252	22.0382	NA	NA	NA	88.8777	NA		289.301	11.0935	3.83459	11.6371	4.02374
UK012	UK012_507	NA	709	13680	267.2	1.48941	NA	NA	21.7865	3.8895	0.0477	8.98841	NA	NA	0.301879	9.79386	0.0459	3.8895	0.067068	NA	NA	NA	NA	NA	289.301	11.0036	11.5515	267.866	23.0632	23.3237	NA	NA	NA	8.25946	NA		289.301	11.0036	3.80352	11.5515	4.04459
UK012	UK012_306	NA	1111	20730	387	0.883562	NA	NA	21.692	3.95392	0.0539	7.92912	NA	NA	0.342603	8.86028	0.0461	3.95392	0.055996	NA	NA	NA	NA	NA	290.533	11.2325	11.7741	299.142	22.9612	23.2776	NA	NA	NA	49.1999	NA		290.533	11.2325	3.86615	11.7741	4.0314
UK012	UK012_585	NA	1790	31100	797	3.74706	NA	NA	21.692	4.21218	0.0533	7.5362	NA	NA	0.338789	8.63347	0.0461	4.21218	0.20859	NA	NA	NA	NA	NA	290.533	11.9661	12.4759	296.254	22.1871	22.5091	NA	NA	NA	61.8081	NA		290.533	11.9661	4.11868	12.4759	4.28017
UK012	UK012_148	NA	465	9100	177	1.4604	NA	NA	21.5517	4.20637	0.0503	11.5618	NA	NA	0.321801	12.3032	0.0464	4.20637	0.2279	NA	NA	NA	NA	NA	292.382	12.0239	12.5376	283.287	30.4227	30.6409	NA	NA	NA	54.3385	NA		292.382	12.0239	4.11241	12.5376	4.29737
UK012	UK012_6	NA	897	16620	283.3	1.88239	NA	NA	21.4592	4.02415	0.0531	7.66059	NA	NA	0.341179	8.65323	0.0466	4.02415	0.032941	NA	NA	NA	NA	NA	293.614	11.5504	12.0885	298.064	22.3549	22.6778	NA	NA	NA	72.0221	NA		293.614	11.5504	3.93388	12.0885	4.10459
UK012	UK012_342	NA	961	16830	356	1.12303	NA	NA	21.4592	4.06525	0.0559	8.02477	NA	NA	0.359169	8.99574	0.0466	4.06525	-0.057451	NA	NA	NA	NA	NA	293.614	11.6684	12.2013	311.594	24.142	24.4649	NA	NA	NA	19.1957	NA		293.614	11.6684	3.97407	12.2013	4.10539
UK012	UK012_609	NA	569	9030	220.3	2.22976	NA	NA	21.4592	4.59487	0.0572	9.17834	NA	NA	0.367522	10.2642	0.0466	4.59487	-0.19791	NA	NA	NA	NA	NA	293.614	13.1886	13.6623	317.815	28.0166	28.3049	NA	NA	NA	14.8185	NA		293.614	13.1886	4.49181	13.6623	4.57032
UK012	UK012_189	NA	803	15340	277.1	0.712339	NA	NA	21.4133	3.98445	0.0508	8.55471	NA	NA	0.327101	9.4371	0.0467	3.98445	0.36165	NA	NA	NA	NA	NA	294.23	11.4599	12.0043	287.35	23.6224	23.9097	NA	NA	NA	53.444	NA		294.23	11.4599	3.89489	12.0043	4.08656
UK012	UK012_60	NA	530	9740	214	0.951111	NA	NA	21.2314	4.05854	0.0582	8.58606	NA	NA	0.377959	9.49696	0.0471	4.05854	0.25942	NA	NA	NA	NA	NA	296.693	11.7685	12.3077	325.536	26.4558	26.7735	NA	NA	NA	2.84208	NA		296.693	11.7685	3.96657	12.3077	4.11661
UK012	UK012_399	NA	541	9840	208.3	1.10739	NA	NA	20.79	4.54674	0.0579	9.48155	NA	NA	0.383994	10.5154	0.0481	4.54674	0.52487	NA	NA	NA	NA	NA	302.846	13.4512	13.9445	329.973	29.6324	29.923	NA	NA	NA	3.45934	NA		302.846	13.4512	4.4416	13.9445	4.62562
UK012	UK012_437	NA	3430	57000	1103	1.49661	NA	NA	20.6612	3.93408	0.0592	6.51646	NA	NA	0.395065	7.61191	0.0484	3.93408	-0.29605	NA	NA	NA	NA	NA	304.691	11.7079	12.278	338.063	21.891	22.2987	NA	NA	NA	1.69253	NA		304.691	11.7079	3.84256	12.278	3.91299
UK012	UK012_615	NA	2610	48400	1114	0.908646	NA	NA	20.3335	3.80526	0.0538	6.64252	NA	NA	0.364814	7.65527	0.04918	3.80526	0.49426	NA	NA	NA	NA	NA	309.485	11.4985	12.096	315.803	20.7802	21.1629	NA	NA	NA	48.6462	NA		309.485	11.4985	3.71537	12.096	3.9052
UK012	UK012_289	NA	814	16680	290.9	1.77703	NA	NA	20.284	4.1552	0.049	8.97891	NA	NA	0.333077	9.89376	0.0493	4.1552	0.17544	NA	NA	NA	NA	NA	310.223	12.5851	13.1358	291.912	25.1055	25.3834	NA	NA	NA	15.6797	NA		310.223	12.5851	4.05681	13.1358	4.27374
UK012	UK012_512	NA	1499	28750	540	2.21584	NA	NA	20.284	4.0313	0.0492	7.3114	NA	NA	0.334436	8.34913	0.0493	4.0313	0.63648	NA	NA	NA	NA	NA	310.223	12.2099	12.7767	292.947	21.2496	21.5791	NA	NA	NA	3.38644	NA		310.223	12.2099	3.93585	12.7767	4.10714
UK012	UK012_582	NA	1530	26990	631	4.92969	NA	NA	20	4.1883	0.0535	8.19714	NA	NA	0.368829	9.20516	0.05	4.1883	0.20794	NA	NA	NA	NA	NA	314.522	12.8569	13.4108	318.785	25.1899	25.5117	NA	NA	NA	74.1255	NA		314.522	12.8569	4.08778	13.4108	4.25544
UK012	UK012_481	NA	787	14000	238.7	1.64621	NA	NA	19.6464	3.9787	0.0563	8.43473	NA	NA	0.395119	9.32602	0.0509	3.9787	-0.26534	NA	NA	NA	NA	NA	320.045	12.4227	13.0145	338.102	26.8253	27.1592	NA	NA	NA	26.764	NA		320.045	12.4227	3.88156	13.0145	4.0147
UK012	UK012_389	NA	2160	39700	848	1.45704	NA	NA	19.5312	3.91333	0.0556	6.65343	NA	NA	0.392506	7.71895	0.0512	3.91333	0.53457	NA	NA	NA	NA	NA	321.885	12.2871	12.8916	336.198	22.0956	22.496	NA	NA	NA	12.7932	NA		321.885	12.2871	3.81724	12.8916	4.00314
UK012	UK012_639	NA	1388	26150	506	1.66777	NA	NA	18.5185	3.89563	0.0537	7.54377	NA	NA	0.399824	8.49026	0.054	3.89563	0.0030087	NA	NA	NA	NA	NA	339.033	12.8662	13.5048	341.521	24.6281	24.9976	NA	NA	NA	85.7776	NA		339.033	12.8662	3.79497	13.5048	3.97712
UK012	UK012_101	NA	1067	19810	385	2.23837	NA	NA	18.3824	4.16076	0.0564	7.96574	NA	NA	0.423038	8.98693	0.0544	4.16076	0.18664	NA	NA	NA	NA	NA	341.479	13.8384	14.4423	358.221	27.1336	27.4972	NA	NA	NA	23.5467	NA		341.479	13.8384	4.05248	14.4423	4.19843
UK012	UK012_183	NA	1580	31100	486	1.89179	NA	NA	18.1818	3.88994	0.0483	7.09506	NA	NA	0.366278	8.09145	0.055	3.88994	-0.015849	NA	NA	NA	NA	NA	345.146	13.0729	13.7237	316.891	22.0291	22.3926	NA	NA	NA	2.73012	NA		345.146	13.0729	3.78765	13.7237	4.06605
UK012	UK012_550	NA	3780	68300	1347	1.09334	NA	NA	18.1159	3.8646	0.0571	6.44872	NA	NA	0.434587	7.51805	0.0552	3.8646	0.14001	NA	NA	NA	NA	NA	346.368	13.0325	13.6896	366.428	23.1292	23.5708	NA	NA	NA	10.9372	NA		346.368	13.0325	3.76262	13.6896	3.90691
UK012	UK012_116	NA	1293	23300	406.8	5.77021	NA	NA	17.7305	3.99378	0.0548	8.25478	NA	NA	0.426148	9.17015	0.0564	3.99378	0.083622	NA	NA	NA	NA	NA	353.695	13.7453	14.3952	360.438	27.8299	28.1882	NA	NA	NA	65.3597	NA		353.695	13.7453	3.8862	14.3952	4.05656
UK012	UK012_587	NA	1920	34270	704	0.93245	NA	NA	17.452	4.05012	0.0515	7.40571	NA	NA	0.406877	8.44086	0.0573	4.05012	0.20361	NA	NA	NA	NA	NA	359.184	14.1496	14.8005	346.624	24.7919	25.1681	NA	NA	NA	33.0496	NA		359.184	14.1496	3.93936	14.8005	4.14892
UK012	UK012_509	NA	5390	97700	1541	1.35651	NA	NA	17.4216	3.9278	0.0513	6.24013	NA	NA	0.406004	7.37338	0.0574	3.9278	0.23456	NA	NA	NA	NA	NA	359.794	13.7449	14.4163	345.994	21.6225	22.0515	NA	NA	NA	22.2923	NA		359.794	13.7449	3.8202	14.4163	4.04326
UK012	UK012_589	NA	1856	34720	692	2.27034	NA	NA	17.1821	3.87361	0.0506	6.92592	NA	NA	0.406046	7.93557	0.0582	3.87361	0.21985	NA	NA	NA	NA	NA	364.669	13.7338	14.4231	346.023	23.2734	23.6726	NA	NA	NA	12.2408	NA		364.669	13.7338	3.76609	14.4231	3.99727
UK012	UK012_421	NA	4930	89900	1497	3.06135	NA	NA	17.0648	4.06989	0.0535	5.91832	NA	NA	0.432268	7.18265	0.0586	4.06989	0.40204	NA	NA	NA	NA	NA	367.106	14.5234	15.1852	364.785	22.0146	22.4747	NA	NA	NA	82.4461	NA		367.106	14.5234	3.95618	15.1852	4.1414
UK012	UK012_187	NA	3730	62400	909	48.4542	NA	NA	16.9779	4.00257	0.0583	6.73167	NA	NA	0.473462	7.83173	0.0589	4.00257	-0.08212	NA	NA	NA	NA	NA	368.932	14.3522	15.0279	393.577	25.5579	26.0079	NA	NA	NA	10.6295	NA		368.932	14.3522	3.8902	15.0279	4.0059
UK012	UK012_237	NA	2227	39300	587	4.29407	NA	NA	16.9779	3.8935	0.0547	6.99379	NA	NA	0.444226	8.00452	0.0589	3.8935	-0.27464	NA	NA	NA	NA	NA	368.932	13.9611	14.6548	373.228	25.0047	25.4263	NA	NA	NA	78.7293	NA		368.932	13.9611	3.78418	14.6548	3.95901
UK012	UK012_431	NA	1860	33400	527	2.75916	NA	NA	16.835	4.029	0.0541	7.07104	NA	NA	0.443083	8.13833	0.0594	4.029	0.072018	NA	NA	NA	NA	NA	371.976	14.5627	15.2396	372.424	25.3775	25.7916	NA	NA	NA	97.4751	NA		371.976	14.5627	3.91497	15.2396	4.09579
UK012	UK012_199	NA	937	15950	222.4	2.64133	NA	NA	16.4474	4.18445	0.059	8.74222	NA	NA	0.494603	9.69206	0.0608	4.18445	0.22465	NA	NA	NA	NA	NA	380.489	15.4606	16.1279	408.043	32.5781	32.9539	NA	NA	NA	9.60614	NA		380.489	15.4606	4.06336	16.1279	4.20493
UK012	UK012_18	NA	1773	32220	433.3	1.60481	NA	NA	16.3399	3.88199	0.0549	6.82062	NA	NA	0.46326	7.84797	0.0612	3.88199	0.059866	NA	NA	NA	NA	NA	382.919	14.432	15.1533	386.523	25.2337	25.6761	NA	NA	NA	79.9213	NA		382.919	14.432	3.76895	15.1533	3.9487
UK012	UK012_598	NA	5370	94400	1783	2.45592	NA	NA	16.2602	3.9278	0.0527	6.06759	NA	NA	0.446876	7.22795	0.0615	3.9278	0.17544	NA	NA	NA	NA	NA	384.741	14.6698	15.3863	375.089	22.6711	23.139	NA	NA	NA	43.4148	NA		384.741	14.6698	3.81289	15.3863	4.0253
UK012	UK012_275	NA	3190	57500	799	0.815306	NA	NA	16.2338	3.90288	0.0566	6.22509	NA	NA	0.480727	7.3474	0.0616	3.90288	0.33453	NA	NA	NA	NA	NA	385.349	14.599	15.3211	398.571	24.2253	24.7093	NA	NA	NA	26.7275	NA		385.349	14.599	3.78853	15.3211	3.95369
UK012	UK012_44	NA	1876	32460	510	15.9875	NA	NA	16.1031	3.97647	0.0589	7.29141	NA	NA	0.504322	8.30524	0.0621	3.97647	0.074939	NA	NA	NA	NA	NA	388.384	14.988	15.7027	414.624	28.2789	28.7221	NA	NA	NA	9.3046	NA		388.384	14.988	3.85906	15.7027	3.99052
UK012	UK012_174	NA	1104	17960	250	3.80518	NA	NA	16.0772	3.94892	0.056	8.46741	NA	NA	0.480264	9.34296	0.0622	3.94892	0.20376	NA	NA	NA	NA	NA	388.991	14.9067	15.6273	398.254	30.7885	31.1705	NA	NA	NA	55.5883	NA		388.991	14.9067	3.83214	15.6273	4.00509
UK012	UK012_8	NA	1583	27900	357	4.64844	NA	NA	16.0256	4.00228	0.055	7.08313	NA	NA	0.473204	8.13566	0.0624	4.00228	0.26816	NA	NA	NA	NA	NA	390.205	15.1539	15.8674	393.4	26.5404	26.9737	NA	NA	NA	81.1718	NA		390.205	15.1539	3.88357	15.8674	4.06082
UK012	UK012_84	NA	3270	60000	991	2.682	NA	NA	16.0256	3.81914	0.0563	6.27376	NA	NA	0.484389	7.34478	0.0624	3.81914	0.16659	NA	NA	NA	NA	NA	390.205	14.4604	15.2065	401.08	24.341	24.8277	NA	NA	NA	40.7174	NA		390.205	14.4604	3.70585	15.2065	3.87364
UK012	UK012_271	NA	1410	25110	346.9	1.21549	NA	NA	16.0256	4.00228	0.0563	7.54145	NA	NA	0.484389	8.53766	0.0624	4.00228	0.48477	NA	NA	NA	NA	NA	390.205	15.1539	15.8674	401.08	28.2962	28.716	NA	NA	NA	38.2563	NA		390.205	15.1539	3.88357	15.8674	4.06286
UK012	UK012_301	NA	2620	49400	673	2.90086	NA	NA	15.748	3.91609	0.0516	6.60718	NA	NA	0.451778	7.68053	0.0635	3.91609	-0.033049	NA	NA	NA	NA	NA	396.876	15.0733	15.8139	378.523	24.2733	24.7175	NA	NA	NA	20.3423	NA		396.876	15.0733	3.79798	15.8139	4.03852
UK012	UK012_415	NA	1770	30500	504	8.82662	NA	NA	15.7233	5.70681	0.0568	7.39159	NA	NA	0.498089	9.33827	0.0636	5.70681	0.85359	NA	NA	NA	NA	NA	397.482	21.9984	22.5139	410.408	31.5359	31.9275	NA	NA	NA	13.6159	NA		397.482	21.9984	5.53445	22.5139	5.73656
UK012	UK012_368	NA	3250	58800	988	18.819	NA	NA	15.674	4.04886	0.0553	6.45538	NA	NA	0.48646	7.62005	0.0638	4.04886	0.57474	NA	NA	NA	NA	NA	398.694	15.6535	16.3741	402.495	25.3263	25.7971	NA	NA	NA	71.4554	NA		398.694	15.6535	3.9262	16.3741	4.10545
UK012	UK012_495	NA	1610	30220	408	3.81308	NA	NA	15.674	3.91442	0.0482	8.16417	NA	NA	0.424003	9.05408	0.0638	3.91442	0.0018944	NA	NA	NA	NA	NA	398.694	15.1338	15.878	358.909	27.3802	27.7418	NA	NA	NA	1.00347	NA		398.694	15.1338	3.79584	15.878	4.08112
UK012	UK012_152	NA	818	15850	219.7	1.40383	NA	NA	15.625	4.14273	0.0514	9.0591	NA	NA	0.45357	9.9614	0.064	4.14273	0.63291	NA	NA	NA	NA	NA	399.906	16.0636	16.7707	379.776	31.5717	31.9166	NA	NA	NA	9.96733	NA		399.906	16.0636	4.01685	16.7707	4.17373
UK012	UK012_278	NA	2860	47950	636	1.73061	NA	NA	15.5763	4.14031	0.0597	6.64204	NA	NA	0.528458	7.8268	0.0642	4.14031	0.19132	NA	NA	NA	NA	NA	401.117	16.1014	16.8109	430.786	27.4838	27.9684	NA	NA	NA	4.31117	NA		401.117	16.1014	4.01414	16.8109	4.13043
UK012	UK012_111	NA	700	13600	211.2	1.7129	NA	NA	15.456	3.90956	0.0527	8.68074	NA	NA	0.470128	9.5205	0.0647	3.90956	0.18811	NA	NA	NA	NA	NA	404.145	15.3153	16.0702	391.277	30.9232	31.2928	NA	NA	NA	41.6382	NA		404.145	15.3153	3.78954	16.0702	3.99501
UK012	UK012_232	NA	3420	57200	752	1.61028	NA	NA	15.2672	4.03334	0.0599	6.95264	NA	NA	0.540965	8.03786	0.0655	4.03334	0.19004	NA	NA	NA	NA	NA	408.987	15.9835	16.7248	439.061	28.6591	29.1384	NA	NA	NA	4.73928	NA		408.987	15.9835	3.90807	16.7248	4.03631
UK012	UK012_228	NA	1560	28140	372	4.76923	NA	NA	15.1745	4.02986	0.0553	7.75263	NA	NA	0.502472	8.73745	0.0659	4.02986	0.23844	NA	NA	NA	NA	NA	411.407	16.0612	16.8074	413.374	29.6786	30.0992	NA	NA	NA	89.6353	NA		411.407	16.0612	3.90397	16.8074	4.08226
UK012	UK012_285	NA	2260	38700	508	2.64171	NA	NA	15.1745	4.00202	0.0562	7.49669	NA	NA	0.51065	8.49803	0.0659	4.00202	0.089695	NA	NA	NA	NA	NA	411.407	15.9502	16.7014	418.886	29.1761	29.613	NA	NA	NA	64.0586	NA		411.407	15.9502	3.877	16.7014	4.0444
UK012	UK012_266	NA	2450	41630	521	1.78364	NA	NA	15.0602	3.8007	0.0576	7.16953	NA	NA	0.527341	8.11464	0.0664	3.8007	-0.16291	NA	NA	NA	NA	NA	414.43	15.2557	16.0503	430.044	28.4557	28.9227	NA	NA	NA	36.6029	NA		414.43	15.2557	3.68112	16.0503	3.83619
UK012	UK012_590	NA	1270	20980	372	2.6458	NA	NA	14.9925	4.11182	0.0543	8.0414	NA	NA	0.499375	9.03168	0.0667	4.11182	0.22218	NA	NA	NA	NA	NA	416.243	16.5744	17.3147	411.279	30.5525	30.9579	NA	NA	NA	75.105	NA		416.243	16.5744	3.98189	17.3147	4.16802
UK012	UK012_623	NA	3460	57600	955	1.58113	NA	NA	14.6628	4.12673	0.0613	6.86489	NA	NA	0.576429	8.00978	0.0682	4.12673	0.36995	NA	NA	NA	NA	NA	425.302	16.9847	17.7379	462.164	29.7472	30.2482	NA	NA	NA	1.01182	NA		425.302	16.9847	3.99355	17.7379	4.12975
UK012	UK012_136	NA	2411	44400	598	1.06028	NA	NA	14.5349	4.06108	0.0538	6.55752	NA	NA	0.510355	7.7132	0.0688	4.06108	0.37244	NA	NA	NA	NA	NA	428.922	16.8521	17.6232	418.688	26.4701	26.9505	NA	NA	NA	42.1271	NA		428.922	16.8521	3.92893	17.6232	4.12693
UK012	UK012_588	NA	678	11100	185	2.33291	NA	NA	14.3885	4.38464	0.0539	8.10292	NA	NA	0.516505	9.21317	0.0695	4.38464	0.45202	NA	NA	NA	NA	NA	433.143	18.3678	19.0911	422.814	31.8722	32.2788	NA	NA	NA	46.9757	NA		433.143	18.3678	4.24059	19.0911	4.41734
UK012	UK012_638	NA	2030	35820	530	1.81445	NA	NA	14.3885	3.97584	0.0575	7.1515	NA	NA	0.551003	8.18238	0.0695	3.97584	0.28387	NA	NA	NA	NA	NA	433.143	16.6553	17.4497	445.653	29.5238	30.0005	NA	NA	NA	39.8176	NA		433.143	16.6553	3.84522	17.4497	4.01072
UK012	UK012_315	NA	5110	87300	1058	1.09185	NA	NA	14.0252	3.82775	0.0577	5.95687	NA	NA	0.56724	7.08067	0.0713	3.82775	0.48245	NA	NA	NA	NA	NA	443.983	16.4226	17.2662	456.228	26.0274	26.587	NA	NA	NA	29.1737	NA		443.983	16.4226	3.69892	17.2662	3.87685
UK012	UK012_440	NA	2350	41200	533	0.894295	NA	NA	14.0252	4.1542	0.0556	7.13116	NA	NA	0.546595	8.25292	0.0713	4.1542	0.41436	NA	NA	NA	NA	NA	443.983	17.8232	18.6034	442.764	29.6244	30.0946	NA	NA	NA	92.9349	NA		443.983	17.8232	4.01438	18.6034	4.19163
UK012	UK012_417	NA	2256	37080	531.5	2.55161	NA	NA	14.0056	3.87883	0.0582	6.72489	NA	NA	0.572958	7.76334	0.0714	3.87883	0.55669	NA	NA	NA	NA	NA	444.585	16.6635	17.4977	459.926	28.721	29.2356	NA	NA	NA	20.1808	NA		444.585	16.6635	3.7481	17.4977	3.93403
UK012	UK012_221	NA	11560	194100	2385	41.0499	NA	NA	13.9665	3.81235	0.05792	5.19263	NA	NA	0.571798	6.44185	0.0716	3.81235	0.77728	NA	NA	NA	NA	NA	445.788	16.4207	17.2709	459.177	23.7994	24.4162	NA	NA	NA	7.90462	NA		445.788	16.4207	3.68353	17.2709	3.89354
UK012	UK012_234	NA	1520	28120	343.8	13.6429	NA	NA	13.9665	3.84281	0.055	7.64719	NA	NA	0.542971	8.55843	0.0716	3.84281	-0.10746	NA	NA	NA	NA	NA	445.788	16.5519	17.3957	440.382	30.5896	31.0414	NA	NA	NA	76.5496	NA		445.788	16.5519	3.71296	17.3957	3.91411
UK012	UK012_224	NA	1360	21890	261.3	2.68275	NA	NA	13.7931	4.05615	0.0597	7.83553	NA	NA	0.596779	8.82314	0.0725	4.05615	0.34265	NA	NA	NA	NA	NA	451.2	17.6756	18.4864	475.188	33.4949	33.9606	NA	NA	NA	13.8273	NA		451.2	17.6756	3.91746	18.4864	4.07562
UK012	UK012_66	NA	1780	31200	437	2.55855	NA	NA	13.624	3.88967	0.0614	7.01289	NA	NA	0.621392	8.01936	0.0734	3.88967	0.37231	NA	NA	NA	NA	NA	456.607	17.1461	17.9998	490.719	31.2165	31.741	NA	NA	NA	2.2437	NA		456.607	17.1461	3.75512	17.9998	3.9135
UK012	UK012_613	NA	854	15300	234.2	1.48416	NA	NA	13.6054	4.02209	0.0565	8.27206	NA	NA	0.572581	9.19805	0.0735	4.02209	0.66569	NA	NA	NA	NA	NA	457.208	17.7524	18.5802	459.683	34.0183	34.4537	NA	NA	NA	84.8336	NA		457.208	17.7524	3.88278	18.5802	4.06673
UK012	UK012_633	NA	3910	68000	971	2.3119	NA	NA	13.5685	3.94984	0.058	6.17392	NA	NA	0.589382	7.3293	0.0737	3.94984	0.75173	NA	NA	NA	NA	NA	458.409	17.4777	18.3221	470.473	27.6037	28.158	NA	NA	NA	19.5539	NA		458.409	17.4777	3.81268	18.3221	4.01564
UK012	UK012_355	NA	3780	63000	865	0.872856	NA	NA	13.5501	3.90737	0.0605	6.3637	NA	NA	0.61562	7.46754	0.0738	3.90737	0.31208	NA	NA	NA	NA	NA	459.009	17.3116	18.1659	487.099	28.9001	29.4593	NA	NA	NA	5.2293	NA		459.009	17.3116	3.77152	18.1659	3.91805
UK012	UK012_470	NA	1185	19530	235.6	3.59695	NA	NA	13.5318	4.07094	0.0604	7.96098	NA	NA	0.615436	8.94146	0.0739	4.07094	0.29022	NA	NA	NA	NA	NA	459.609	18.059	18.8816	486.982	34.6019	35.0704	NA	NA	NA	11.1637	NA		459.609	18.059	3.92922	18.8816	4.0797
UK012	UK012_603	NA	9590	165200	2506	1.92621	NA	NA	13.5318	3.90692	0.0557	5.44121	NA	NA	0.567546	6.69856	0.0739	3.90692	0.51973	NA	NA	NA	NA	NA	459.609	17.3314	18.1869	456.426	24.6307	25.2217	NA	NA	NA	76.7129	NA		459.609	17.3314	3.7709	18.1869	3.96173
UK012	UK012_453	NA	2320	42140	509	1.84822	NA	NA	13.4953	3.80724	0.0539	6.70056	NA	NA	0.550691	7.70666	0.0741	3.80724	0.4865	NA	NA	NA	NA	NA	460.81	16.9318	17.8107	445.449	27.7963	28.3017	NA	NA	NA	20.7419	NA		460.81	16.9318	3.67435	17.8107	3.87845
UK012	UK012_43	NA	6340	114900	1555	1.62998	NA	NA	13.4409	3.79423	0.0556	6.0846	NA	NA	0.57036	7.17067	0.0744	3.79423	-0.43857	NA	NA	NA	NA	NA	462.61	16.9375	17.8227	458.247	26.4507	27.0054	NA	NA	NA	81.4086	NA		462.61	16.9375	3.66129	17.8227	3.86543
UK012	UK012_419	NA	1066	17940	245	2.11207	NA	NA	13.4409	3.99125	0.056	7.9795	NA	NA	0.574463	8.92203	0.0744	3.99125	-0.071909	NA	NA	NA	NA	NA	462.61	17.817	18.6605	460.897	33.0656	33.5152	NA	NA	NA	92.9356	NA		462.61	17.817	3.85142	18.6605	4.03735
UK012	UK012_268	NA	1390	24370	277.7	4.00722	NA	NA	13.3869	4.1186	0.0579	8.06347	NA	NA	0.596349	9.05441	0.0747	4.1186	-0.19492	NA	NA	NA	NA	NA	464.41	18.4545	19.2761	474.914	34.358	34.8118	NA	NA	NA	61.8222	NA		464.41	18.4545	3.97375	19.2761	4.12632
UK012	UK012_89	NA	2820	46900	665	1.31788	NA	NA	13.3333	3.83333	0.0626	6.58122	NA	NA	0.647347	7.61623	0.075	3.83333	0.1625	NA	NA	NA	NA	NA	466.209	17.2404	18.1236	506.845	30.3985	30.9642	NA	NA	NA	1.32984	NA		466.209	17.2404	3.69801	18.1236	3.8237
UK012	UK012_1	NA	2524	44100	457	1.23181	NA	NA	13.3156	3.92132	0.0582	6.72833	NA	NA	0.602649	7.78763	0.0751	3.92132	-0.0031667	NA	NA	NA	NA	NA	466.809	17.658	18.5234	478.913	29.743	30.2727	NA	NA	NA	48.5903	NA		466.809	17.658	3.78272	18.5234	3.94165
UK012	UK012_407	NA	1330	22690	319	1.21756	NA	NA	13.2802	4.05904	0.0562	7.6711	NA	NA	0.583489	8.6788	0.0753	4.05904	0.0015672	NA	NA	NA	NA	NA	468.008	18.3235	19.1628	466.701	32.4829	32.9496	NA	NA	NA	94.4066	NA		468.008	18.3235	3.91521	19.1628	4.09732
UK012	UK012_334	NA	8510	143100	1793	1.70275	NA	NA	13.2626	3.79267	0.0572	5.58351	NA	NA	0.59466	6.74981	0.0754	3.79267	0.25498	NA	NA	NA	NA	NA	468.607	17.1421	18.0387	473.839	25.5631	26.1673	NA	NA	NA	69.7692	NA		468.607	17.1421	3.6581	18.0387	3.83872
UK012	UK012_31	NA	2380	42200	516	0.661538	NA	NA	13.1926	3.84652	0.0557	6.81499	NA	NA	0.582138	7.82559	0.0758	3.84652	0.37457	NA	NA	NA	NA	NA	471.004	17.4713	18.3603	465.834	29.2448	29.7606	NA	NA	NA	71.0222	NA		471.004	17.4713	3.70937	18.3603	3.90448
UK012	UK012_28	NA	5040	86600	1032	0.939035	NA	NA	13.1475	3.77884	0.057	5.92397	NA	NA	0.597768	7.0266	0.07606	3.77884	0.20133	NA	NA	NA	NA	NA	472.562	17.2186	18.1256	475.816	26.6989	27.2817	NA	NA	NA	82.0802	NA		472.562	17.2186	3.64367	18.1256	3.8291
UK012	UK012_295	NA	3390	59200	672	1.08039	NA	NA	13.1234	3.84537	0.0548	6.46421	NA	NA	0.575754	7.52149	0.0762	3.84537	0.55705	NA	NA	NA	NA	NA	473.401	17.5517	18.4453	461.729	27.9121	28.4446	NA	NA	NA	31.318	NA		473.401	17.5517	3.70757	18.4453	3.90323
UK012	UK012_169	NA	4190	69200	782	1.40395	NA	NA	13.089	3.91516	0.0565	6.97493	NA	NA	0.595173	7.99864	0.0764	3.91516	0.50562	NA	NA	NA	NA	NA	474.599	17.9138	18.7944	474.166	30.3117	30.8236	NA	NA	NA	97.3692	NA		474.599	17.9138	3.77452	18.7944	3.96031
UK012	UK012_259	NA	5590	90000	1015	1.40387	NA	NA	13.089	3.84479	0.0601	8.64643	NA	NA	0.633095	9.46272	0.0764	3.84479	0.19672	NA	NA	NA	NA	NA	474.599	17.5919	18.4878	498.022	37.2648	37.7157	NA	NA	NA	22.0933	NA		474.599	17.5919	3.70668	18.4878	3.87247
UK012	UK012_3	NA	2850	49300	489	4.89	NA	NA	12.8535	3.96995	0.0582	6.48829	NA	NA	0.624315	7.60647	0.0778	3.96995	0.032425	NA	NA	NA	NA	NA	482.978	18.4734	19.3571	492.548	29.6941	30.2482	NA	NA	NA	57.9419	NA		482.978	18.4734	3.82489	19.3571	3.98652
UK012	UK012_40	NA	1780	31140	387	1.1511	NA	NA	12.8535	3.94865	0.0564	7.85035	NA	NA	0.605006	8.78748	0.0778	3.94865	-0.069927	NA	NA	NA	NA	NA	482.978	18.3742	19.2625	480.406	33.6462	34.1178	NA	NA	NA	89.6154	NA		482.978	18.3742	3.80437	19.2625	3.9935
UK012	UK012_191	NA	1450	24480	270.6	1.9941	NA	NA	12.8535	3.82643	0.0585	7.57814	NA	NA	0.627533	8.48939	0.0778	3.82643	0.10042	NA	NA	NA	NA	NA	482.978	17.8055	18.7208	494.558	33.2482	33.7472	NA	NA	NA	52.2612	NA		482.978	17.8055	3.68661	18.7208	3.85808
UK012	UK012_178	NA	2270	40600	441	2.01831	NA	NA	12.7877	3.88884	0.0517	6.81814	NA	NA	0.557441	7.84921	0.0782	3.88884	0.1324	NA	NA	NA	NA	NA	485.37	18.1822	19.0878	449.859	28.5336	29.0339	NA	NA	NA	2.38901	NA		485.37	18.1822	3.74605	19.0878	4.01184
UK012	UK012_514	NA	1448	25000	298	1.98667	NA	NA	12.7226	4.22133	0.0537	7.42937	NA	NA	0.581967	8.54489	0.0786	4.22133	0.53291	NA	NA	NA	NA	NA	487.761	19.8304	20.6716	465.725	31.9286	32.4017	NA	NA	NA	10.1438	NA		487.761	19.8304	4.06559	20.6716	4.25486
UK012	UK012_383	NA	2376	42500	574	29.7409	NA	NA	12.6904	3.94339	0.0573	6.75704	NA	NA	0.622561	7.82355	0.0788	3.94339	0.51522	NA	NA	NA	NA	NA	488.956	18.5684	19.4684	491.451	30.4891	31.0272	NA	NA	NA	84.9538	NA		488.956	18.5684	3.79756	19.4684	3.98009
UK012	UK012_614	NA	2090	37180	542	1.5043	NA	NA	12.6263	4.00578	0.0568	7.39482	NA	NA	0.620261	8.41009	0.0792	4.00578	0.0071639	NA	NA	NA	NA	NA	491.346	18.9509	19.8417	490.011	32.7017	33.2017	NA	NA	NA	94.3486	NA		491.346	18.9509	3.85693	19.8417	4.04098
UK012	UK012_424	NA	1210	21090	256	0.937042	NA	NA	12.5471	3.95917	0.0559	8.30292	NA	NA	0.614287	9.19856	0.0797	3.95917	-0.28739	NA	NA	NA	NA	NA	494.332	18.8399	19.746	486.26	35.5564	36.0115	NA	NA	NA	71.7774	NA		494.332	18.8399	3.81119	19.746	4.01247
UK012	UK012_358	NA	1129	18930	241	2.47942	NA	NA	12.4688	3.95646	0.0594	8.16182	NA	NA	0.656844	9.07022	0.0802	3.95646	-0.11438	NA	NA	NA	NA	NA	497.316	18.9363	19.8483	512.682	36.5271	37.0079	NA	NA	NA	47.6842	NA		497.316	18.9363	3.8077	19.8483	3.96245
UK012	UK012_181	NA	1094	17850	187.2	2.0459	NA	NA	12.3305	3.89524	0.0591	7.75022	NA	NA	0.66086	8.67404	0.0811	3.89524	-0.10999	NA	NA	570.782	169.228	170.125	502.685	18.8369	19.7721	515.14	35.0591	35.5633	NA	NA	NA	55.0408	11.9304		502.685	18.8369	3.74725	19.7721	3.90956
UK012	UK012_195	NA	1950	33600	352	2.27097	NA	NA	12.21	3.92826	0.0575	7.88582	NA	NA	0.649311	8.81007	0.0819	3.92826	0.21917	NA	NA	510.762	173.984	174.875	507.454	19.1697	20.1059	508.055	35.2317	35.723	NA	NA	NA	97.3522	0.647703		507.454	19.1697	3.77763	20.1059	3.96133
UK012	UK012_198	NA	1439	25050	259.1	0.935379	NA	NA	12.1065	3.88957	0.0567	7.2616	NA	NA	0.64575	8.23769	0.0826	3.88957	0.075694	NA	NA	479.884	160.974	161.945	511.623	19.1308	20.0833	505.86	32.8312	33.3543	NA	NA	NA	75.318	-6.61393		511.623	19.1308	3.73924	20.0833	3.93595
UK012	UK012_449	NA	2470	42700	455	1.45833	NA	NA	12.1065	3.80419	0.0578	7.0762	NA	NA	0.658278	8.03396	0.0826	3.80419	0.13808	NA	NA	522.189	155.702	156.69	511.623	18.7109	19.6837	513.56	32.3936	32.936	NA	NA	NA	91.2156	2.02336		511.623	18.7109	3.65716	19.6837	3.84416
UK012	UK012_41	NA	4180	71800	867	2.07416	NA	NA	12.0919	3.87279	0.0592	6.04571	NA	NA	0.675038	7.17977	0.0827	3.87279	0.43193	NA	NA	574.459	131.743	132.886	512.219	19.0696	20.0271	523.771	29.3877	30.0025	NA	NA	NA	39.8456	10.8346		512.219	19.0696	3.72293	20.0271	3.89593
UK012	UK012_163	NA	5830	97000	1040	6.72269	NA	NA	12.0773	3.87246	0.0564	5.96075	NA	NA	0.643889	7.1082	0.0828	3.87246	0.55481	NA	NA	468.149	132.267	133.447	512.814	19.0892	20.0479	504.711	28.2775	28.8808	NA	NA	NA	49.3943	-9.54066		512.814	19.0892	3.72245	20.0479	3.91682
UK012	UK012_254	NA	4390	75700	769	2.0152	NA	NA	12.0048	3.85551	0.0566	6.502	NA	NA	0.650074	7.55916	0.0833	3.85551	-0.46206	NA	NA	475.982	144.141	145.224	515.79	19.1116	20.0797	508.524	30.2476	30.8191	NA	NA	NA	73.2564	-8.36334		515.79	19.1116	3.70531	20.0797	3.91226
UK012	UK012_584	NA	1970	33940	483	0.841463	NA	NA	11.9048	3.90132	0.0541	6.85765	NA	NA	0.626582	7.88972	0.084	3.90132	0.25029	NA	NA	375.215	154.772	155.818	519.954	19.4886	20.4532	493.964	30.8693	31.4051	NA	NA	NA	10.2877	-38.5752		519.954	19.4886	3.74814	20.4532	3.97957
UK012	UK012_592	NA	871	14020	191.1	7.70565	NA	NA	11.9048	4.13792	0.0561	8.69411	NA	NA	0.649746	9.62859	0.084	4.13792	0.060649	NA	NA	456.328	193.788	194.607	519.954	20.6705	21.5824	508.322	38.5237	38.974	NA	NA	NA	58.3523	-13.943		519.954	20.6705	3.97545	21.5824	4.17057
UK012	UK012_625	NA	2910	45710	597	2.93655	NA	NA	11.9048	3.88455	0.0634	6.54731	NA	NA	0.734294	7.61295	0.084	3.88455	0.053982	NA	NA	721.676	139.275	140.307	519.954	19.4048	20.3734	559.07	32.7401	33.3501	NA	NA	NA	3.71718	27.9518		519.954	19.4048	3.73203	20.3734	3.84913
UK012	UK012_327	NA	170	2330	25.79	198.385	NA	NA	11.7925	5.01961	0.064	11.834	NA	NA	0.748302	12.8546	0.0848	5.01961	0.43585	NA	NA	741.63	252.333	252.913	524.71	25.2951	26.0586	567.239	55.9226	56.2907	NA	NA	NA	9.75755	29.2491		524.71	25.2951	4.82078	26.0586	4.96665
UK012	UK012_593	NA	2170	36000	489	1.57235	NA	NA	11.7096	3.96893	0.0546	7.17576	NA	NA	0.642912	8.20024	0.0854	3.96893	-0.25895	NA	NA	395.88	161.407	162.404	528.275	20.1308	21.0943	504.108	32.5944	33.1184	NA	NA	NA	25.2959	-33.4431		528.275	20.1308	3.81067	21.0943	4.05283
UK012	UK012_2	NA	2640	44700	425	0.97254	NA	NA	11.6959	3.98852	0.0578	6.76706	NA	NA	0.681389	7.85503	0.0855	3.98852	-0.12945	NA	NA	522.189	148.861	149.894	528.868	20.252	21.212	527.614	32.3334	32.8995	NA	NA	NA	95.0339	-1.27911		528.868	20.252	3.82931	21.212	4.01374
UK012	UK012_250	NA	3292	54300	560	3.06011	NA	NA	11.6959	3.91265	0.0583	6.30006	NA	NA	0.687284	7.41617	0.0855	3.91265	0.32304	NA	NA	541.054	138.092	139.196	528.868	19.8667	20.8445	531.167	30.6824	31.2844	NA	NA	NA	88.1003	2.25224		528.868	19.8667	3.75646	20.8445	3.93776
UK012	UK012_574	NA	963	15250	203.7	1.7485	NA	NA	11.6822	4.00877	0.0604	8.12643	NA	NA	0.712873	9.0614	0.0856	4.00877	0.26143	NA	NA	617.935	176.1	176.95	529.462	20.3767	21.3332	546.451	38.3105	38.8158	NA	NA	NA	37.9023	14.3174		529.462	20.3767	3.84857	21.3332	4.01137
UK012	UK012_533	NA	2620	42600	496	2.37776	NA	NA	11.6686	3.84893	0.0606	6.43582	NA	NA	0.716069	7.49894	0.0857	3.84893	0.31628	NA	NA	625.066	139.096	140.162	530.056	19.5853	20.5806	548.343	31.7827	32.3928	NA	NA	NA	25.012	15.2		530.056	19.5853	3.69495	20.5806	3.85871
UK012	UK012_597	NA	1590	27330	362	2.47437	NA	NA	11.6686	3.87876	0.0546	7.96009	NA	NA	0.645171	8.85482	0.0857	3.87876	-0.113	NA	NA	395.88	179.181	180.082	530.056	19.7371	20.7252	505.503	35.2735	35.7604	NA	NA	NA	24.2747	-33.8932		530.056	19.7371	3.72359	20.7252	3.95881
UK012	UK012_605	NA	5110	87900	1137	5.44019	NA	NA	11.6279	3.87777	0.0573	5.96039	NA	NA	0.679445	7.11079	0.086	3.87777	0.0048271	NA	NA	503.098	131.465	132.638	531.837	19.7957	20.7872	526.439	29.2184	29.8414	NA	NA	NA	75.8829	-5.71238		531.837	19.7957	3.72214	20.7872	3.9211
UK012	UK012_369	NA	1280	21500	268	1.84573	NA	NA	11.6009	4.02637	0.0613	8.12534	NA	NA	0.728566	9.06823	0.0862	4.02637	0.30321	NA	NA	649.777	175.142	175.987	533.024	20.5983	21.5569	555.711	38.8282	39.3395	NA	NA	NA	23.6733	17.9682		533.024	20.5983	3.86442	21.5569	4.02384
UK012	UK012_88	NA	2280	41300	499	8.33055	NA	NA	11.5741	3.89236	0.0567	6.7982	NA	NA	0.675458	7.83364	0.0864	3.89236	0.19311	NA	NA	479.884	150.642	151.678	534.211	19.9552	20.9474	524.025	32.0777	32.6423	NA	NA	NA	55.19	-11.3208		534.211	19.9552	3.73546	20.9474	3.9389
UK012	UK012_534	NA	922	15370	180.4	1.87917	NA	NA	11.5741	4.11684	0.0628	8.85394	NA	NA	0.748126	9.76425	0.0864	4.11684	0.025743	NA	NA	701.465	189.358	190.129	534.211	21.1061	22.0465	567.136	42.4545	42.9373	NA	NA	NA	16.4743	23.8435		534.211	21.1061	3.95089	22.0465	4.08029
UK012	UK012_238	NA	1010	17990	180.5	25.4944	NA	NA	11.5207	4.00149	0.0562	9.69713	NA	NA	0.672601	10.4903	0.0868	4.00149	-0.081264	NA	NA	460.278	216.241	216.977	536.584	20.6021	21.5725	522.292	42.8588	43.2814	NA	NA	NA	55.8081	-16.5782		536.584	20.6021	3.83949	21.5725	4.04286
UK012	UK012_569	NA	3739	63100	820	1.93396	NA	NA	11.4286	3.92181	0.0592	6.17299	NA	NA	0.714218	7.31344	0.0875	3.92181	0.38963	NA	NA	574.459	134.529	135.649	540.735	20.3416	21.3382	547.248	30.9493	31.5735	NA	NA	NA	66.1345	5.8706		540.735	20.3416	3.76184	21.3382	3.9372
UK012	UK012_610	NA	2910	48500	617	2.55698	NA	NA	11.3895	3.92056	0.059	6.46357	NA	NA	0.714246	7.55966	0.0878	3.92056	0.32439	NA	NA	567.096	141.068	142.14	542.513	20.3992	21.3992	547.264	31.9927	32.597	NA	NA	NA	76.5903	4.33492		542.513	20.3992	3.76013	21.3992	3.93759
UK012	UK012_311	NA	1830	33240	330	4.34211	NA	NA	11.3379	4.01374	0.053	7.26435	NA	NA	0.644534	8.29945	0.0882	4.01374	0.21753	NA	NA	328.797	165.368	166.365	544.883	20.9715	21.9534	505.109	33.0396	33.5583	NA	NA	NA	2.17844	-65.7203		544.883	20.9715	3.8488	21.9534	4.10316
UK012	UK012_299	NA	4100	65200	640	2.90909	NA	NA	11.325	3.87054	0.0608	6.18889	NA	NA	0.740228	7.29955	0.0883	3.87054	0.74007	NA	NA	632.166	133.576	134.682	545.475	20.2443	21.262	562.539	31.5373	32.1758	NA	NA	NA	11.5163	13.7133		545.475	20.2443	3.71131	21.262	3.91636
UK012	UK012_381	NA	2150	35580	431	1.64441	NA	NA	11.2994	3.9351	0.0617	7.15757	NA	NA	0.752887	8.16797	0.0885	3.9351	0.021492	NA	NA	663.727	153.791	154.745	546.66	20.6248	21.6287	569.898	35.6368	36.2143	NA	NA	NA	25.7438	17.6378		546.66	20.6248	3.77289	21.6287	3.91637
UK012	UK012_463	NA	466	7310	72.5	1.46465	NA	NA	11.274	4.03156	0.0645	10.9322	NA	NA	0.788832	11.6519	0.0887	4.03156	-0.16141	NA	NA	758.068	232.202	232.825	547.844	21.1743	22.1572	590.509	52.2185	52.6364	NA	NA	NA	15.6606	27.7316		547.844	21.1743	3.86502	22.1572	3.99106
UK012	UK012_401	NA	621	10480	125.8	2.27899	NA	NA	11.2613	4.14486	0.0575	8.67582	NA	NA	0.704015	9.61508	0.0888	4.14486	0.27874	NA	NA	510.762	191.565	192.377	548.436	21.7919	22.75	541.186	40.3571	40.8302	NA	NA	NA	71.7276	-7.3761		548.436	21.7919	3.97345	22.75	4.15612
UK012	UK012_11	NA	3370	55200	505	107.906	NA	NA	11.1982	3.88246	0.0602	6.33992	NA	NA	0.741224	7.43425	0.0893	3.88246	0.54466	NA	NA	610.771	137.342	138.426	551.396	20.5178	21.543	563.119	32.1445	32.7722	NA	NA	NA	38.9545	9.72132		551.396	20.5178	3.72107	21.543	3.90056
UK012	UK012_340	NA	3780	62120	664	12.2509	NA	NA	11.0742	3.89459	0.0599	6.23172	NA	NA	0.745789	7.34862	0.0903	3.89459	0.48977	NA	NA	599.964	135.232	136.337	557.311	20.7933	21.826	565.778	31.8862	32.5233	NA	NA	NA	55.0415	7.10927		557.311	20.7933	3.731	21.826	3.90855
UK012	UK012_516	NA	2580	44200	457.1	11.2864	NA	NA	11.0497	3.92655	0.0536	6.68752	NA	NA	0.668828	7.75504	0.0905	3.92655	0.097285	NA	NA	354.281	151.471	152.547	558.494	21.0065	22.0333	520	31.5687	32.1356	NA	NA	NA	3.16954	-57.6414		558.494	21.0065	3.76128	22.0333	4.02792
UK012	UK012_53	NA	2930	49800	563.1	1.81645	NA	NA	11.0375	3.94348	0.061	6.69905	NA	NA	0.762008	7.77357	0.0906	3.94348	0.15371	NA	NA	639.234	144.473	145.495	559.085	21.1185	22.142	575.168	34.148	34.7584	NA	NA	NA	39.0339	12.5384		559.085	21.1185	3.77733	22.142	3.93362
UK012	UK012_129	NA	405	7060	73.7	1.26632	NA	NA	10.8696	4.37445	0.0582	11.5642	NA	NA	0.738265	12.3639	0.092	4.37445	-0.21778	NA	NA	537.299	255.081	255.695	567.355	23.7579	24.6978	561.392	53.3681	53.7476	NA	NA	NA	84.9424	-5.59382		567.355	23.7579	4.18749	24.6978	4.36293
UK012	UK012_144	NA	1097	18060	181	154.701	NA	NA	10.8578	3.9369	0.0585	8.3104	NA	NA	0.742877	9.19576	0.0921	3.9369	-0.021966	NA	NA	548.538	182.245	183.087	567.945	21.4029	22.4436	564.083	39.819	40.3291	NA	NA	NA	86.5348	-3.53787		567.945	21.4029	3.76847	22.4436	3.95792
UK012	UK012_634	NA	631	10140	114.7	1.14357	NA	NA	10.7759	4.1819	0.0646	9.52207	NA	NA	0.826574	10.3999	0.0928	4.1819	0.096827	NA	NA	761.336	201.806	202.518	572.075	22.8929	23.8821	611.71	47.8217	48.3015	NA	NA	NA	12.4892	24.859		572.075	22.8929	4.00172	23.8821	4.13086
UK012	UK012_346	NA	2582	43000	448	2.76543	NA	NA	10.6838	3.96518	0.06	6.43063	NA	NA	0.774334	7.55485	0.0936	3.96518	0.16906	NA	NA	603.575	139.485	140.555	576.793	21.8776	22.9267	582.246	33.4893	34.1228	NA	NA	NA	76.7058	4.43717		576.793	21.8776	3.79298	22.9267	3.96508
UK012	UK012_465	NA	5050	82400	750	3.57143	NA	NA	10.5263	3.83975	0.0615	5.93521	NA	NA	0.805564	7.06898	0.095	3.83975	0.3379	NA	NA	656.767	127.555	128.702	585.04	21.475	22.5714	599.962	32.0345	32.7256	NA	NA	NA	35.2644	10.9212		585.04	21.475	3.67068	22.5714	3.83676
UK012	UK012_270	NA	5870	97700	879	2.44847	NA	NA	10.3842	3.9361	0.0599	6.23626	NA	NA	0.795343	7.37454	0.0963	3.9361	0.38238	NA	NA	599.964	135.331	136.435	592.689	22.2886	23.3729	594.198	33.1838	33.8423	NA	NA	NA	92.5169	1.21261		592.689	22.2886	3.76059	23.3729	3.94146
UK012	UK012_226	NA	6610	106400	970	4.1154	NA	NA	10.352	3.91891	0.0609	5.66502	NA	NA	0.81114	6.88842	0.0966	3.91891	0.28509	NA	NA	635.704	122.153	123.358	594.453	22.2543	23.3462	603.093	31.3351	32.0467	NA	NA	NA	59.9638	6.48906		594.453	22.2543	3.74367	23.3462	3.9119
UK012	UK012_19	NA	2020	32790	287.3	0.881559	NA	NA	10.2775	3.98292	0.06	7.24595	NA	NA	0.804943	8.26846	0.0973	3.98292	0.19921	NA	NA	603.575	157.273	158.226	598.566	22.7672	23.8494	599.613	37.4588	38.0513	NA	NA	NA	95.8009	0.82975		598.566	22.7672	3.80362	23.8494	3.98289
UK012	UK012_23	NA	1870	27940	256	5.00978	NA	NA	10.1523	4.24883	0.0663	6.83553	NA	NA	0.900432	8.04842	0.0985	4.24883	0.14749	NA	NA	815.861	143.24	144.214	605.612	24.5599	25.5886	651.959	38.7391	39.3856	NA	NA	NA	3.20166	25.7702		605.612	24.5599	4.05538	25.5886	4.14869
UK012	UK012_528	NA	1017	15840	160.5	1.74837	NA	NA	10.1523	3.97709	0.0611	8.53328	NA	NA	0.82981	9.41457	0.0985	3.97709	0.33497	NA	NA	642.756	184.224	185.031	605.612	22.9891	24.085	613.507	43.3778	43.9081	NA	NA	NA	70.5925	5.77885		605.612	22.9891	3.79601	24.085	3.9713
UK012	UK012_9	NA	1650	28610	227.9	2.74248	NA	NA	10.0604	3.956	0.0568	7.52774	NA	NA	0.778459	8.50393	0.0994	3.956	0.092912	NA	NA	483.777	166.801	167.738	610.892	23.0572	24.1679	584.604	37.8131	38.3788	NA	NA	NA	21.1803	-26.2756		610.892	23.0572	3.77436	24.1679	4.00046
UK012	UK012_241	NA	5870	95900	841	1.39008	NA	NA	10.0604	3.85436	0.0598	5.71824	NA	NA	0.819575	6.89596	0.0994	3.85436	0.22935	NA	NA	596.346	124.12	125.322	610.892	22.4648	23.6034	607.811	31.5488	32.2637	NA	NA	NA	85.7229	-2.43922		610.892	22.4648	3.67738	23.6034	3.86946
UK012	UK012_562	NA	3640	58500	653	4.45734	NA	NA	10.0503	3.93932	0.0643	6.39788	NA	NA	0.882136	7.5134	0.0995	3.93932	0.36764	NA	NA	751.514	135.422	136.471	611.478	22.981	24.0972	642.135	35.7709	36.4551	NA	NA	NA	8.00174	18.6338		611.478	22.981	3.75827	24.0972	3.90638
UK012	UK012_631	NA	5860	91900	973	1.2087	NA	NA	9.8912	3.86274	0.0646	6.12024	NA	NA	0.900503	7.23727	0.1011	3.86274	0.1594	NA	NA	761.336	129.313	130.408	620.852	22.8634	24.0172	651.996	34.8331	35.5505	NA	NA	NA	10.8448	18.4522		620.852	22.8634	3.68258	24.0172	3.81896
UK012	UK012_142	NA	1067	17690	160.9	0.756109	NA	NA	9.83284	4.0141	0.0574	7.32821	NA	NA	0.804886	8.35558	0.1017	4.0141	0.37485	NA	NA	506.935	161.705	162.663	624.364	23.8873	25.0056	599.581	37.8523	38.4387	NA	NA	NA	16.9728	-23.1646		624.364	23.8873	3.82586	25.0056	4.03458
UK012	UK012_279	NA	4110	64100	542	8.52201	NA	NA	9.79432	3.8482	0.0651	6.44964	NA	NA	0.916448	7.51043	0.1021	3.8482	0.41347	NA	NA	777.57	135.948	136.985	626.704	22.9817	24.1501	660.48	36.4831	37.1814	NA	NA	NA	5.05147	19.4022		626.704	22.9817	3.66707	24.1501	3.82431
UK012	UK012_69	NA	740	11400	112.4	12.7582	NA	NA	9.72763	4.16518	0.0674	9.7184	NA	NA	0.955332	10.5734	0.1028	4.16518	0.074484	NA	NA	850.159	203.09	203.778	630.797	25.0294	26.1194	680.875	52.5005	53.0104	NA	NA	NA	8.09618	25.8024		630.797	25.0294	3.9679	26.1194	4.09
UK012	UK012_202	NA	4250	68400	565	3.87517	NA	NA	9.66184	3.90963	0.062	6.07919	NA	NA	0.884776	7.22785	0.1035	3.90963	0.54129	NA	NA	674.109	130.288	131.405	634.888	23.6387	24.8039	643.559	34.4651	35.1767	NA	NA	NA	55.6465	5.81821		634.888	23.6387	3.72329	24.8039	3.89982
UK012	UK012_265	NA	3260	55300	457	4.93521	NA	NA	9.66184	3.90963	0.058	6.87327	NA	NA	0.827694	7.9074	0.1035	3.90963	0.31601	NA	NA	529.762	151.015	152.031	634.888	23.6387	24.8039	612.332	36.3761	37.0047	NA	NA	NA	21.4334	-19.844		634.888	23.6387	3.72329	24.8039	3.93802
UK012	UK012_601	NA	401	6310	70.3	2.28247	NA	NA	9.66184	4.60823	0.0584	10.4891	NA	NA	0.833402	11.4567	0.1035	4.60823	-0.16947	NA	NA	544.801	230.737	231.41	634.888	27.8627	28.8578	615.498	52.9273	53.3654	NA	NA	NA	54.1267	-16.5358		634.888	27.8627	4.3886	28.8578	4.58107
UK012	UK012_425	NA	4970	78800	748	3.2381	NA	NA	9.57854	3.8797	0.0603	5.89144	NA	NA	0.867999	7.05416	0.1044	3.8797	0.075244	NA	NA	614.357	127.509	128.673	640.143	23.6424	24.8254	634.48	33.2946	34.0159	NA	NA	NA	77.3194	-4.19728		640.143	23.6424	3.6933	24.8254	3.88926
UK012	UK012_411	NA	551	8000	78.2	1.26333	NA	NA	9.4162	4.36268	0.0699	10.1621	NA	NA	1.02354	11.059	0.1062	4.36268	0.079915	NA	NA	925.417	209.961	210.612	650.641	27.0001	28.0739	715.689	56.858	57.3631	NA	NA	NA	3.67818	29.6921		650.641	27.0001	4.14977	28.0739	4.25083
UK012	UK012_492	NA	5340	80900	637	3.95652	NA	NA	9.15751	3.93301	0.0628	5.86509	NA	NA	0.945548	7.06171	0.1092	3.93301	0.30436	NA	NA	701.465	125.115	126.268	668.1	24.9608	26.1769	675.782	34.862	35.6158	NA	NA	NA	67.1587	4.75646		668.1	24.9608	3.73608	26.1769	3.90594
UK012	UK012_135	NA	1377	22510	191.1	2.73	NA	NA	8.96861	3.84024	0.0579	7.55715	NA	NA	0.890133	8.47691	0.1115	3.84024	0.074785	NA	NA	525.98	166.247	167.173	681.453	24.8339	26.1015	646.441	40.5565	41.1672	NA	NA	NA	12.3834	-29.5588		681.453	24.8339	3.64425	26.1015	3.88323
UK012	UK012_391	NA	4260	65900	610	3.05	NA	NA	8.95255	3.93839	0.0645	6.14977	NA	NA	0.993377	7.30279	0.1117	3.93839	0.38966	NA	NA	758.068	130.008	131.098	682.613	25.5097	26.7492	700.442	36.9688	37.7168	NA	NA	NA	32.1804	9.95362		682.613	25.5097	3.73706	26.7492	3.89694
UK012	UK012_68	NA	7190	114100	1065	3.017	NA	NA	8.92857	3.81051	0.069	5.84039	NA	NA	1.06554	6.97354	0.112	3.81051	0.048818	NA	NA	898.74	120.706	121.827	684.353	24.741	26.0232	736.549	36.5431	37.3532	NA	NA	NA	1.67457	23.8542		684.353	24.741	3.61524	26.0232	3.71959
UK012	UK012_434	NA	5050	75600	631	2.66245	NA	NA	8.90472	3.98042	0.0653	6.15215	NA	NA	1.0111	7.32753	0.1123	3.98042	-0.040179	NA	NA	784.017	129.515	130.6	686.091	25.9064	27.1394	709.43	37.4235	38.1757	NA	NA	NA	31.6323	12.4902		686.091	25.9064	3.77594	27.1394	3.91236
UK012	UK012_384	NA	1770	26910	249	2.39423	NA	NA	8.56898	4.16256	0.0673	7.56278	NA	NA	1.0829	8.63265	0.1167	4.16256	0.078667	NA	NA	847.072	157.787	158.665	711.542	28.0425	29.2652	745.047	45.6021	46.2646	NA	NA	NA	19.8055	15.9998		711.542	28.0425	3.94108	29.2652	4.06522
UK012	UK012_246	NA	3110	48110	366.3	2.7771	NA	NA	8.53242	3.94688	0.0635	6.44276	NA	NA	1.02613	7.55559	0.1172	3.94688	0.60963	NA	NA	725.019	136.966	138.013	714.427	26.6914	27.9829	716.99	38.8728	39.6081	NA	NA	NA	86.8582	1.46087		714.427	26.6914	3.73605	27.9829	3.91568
UK012	UK012_382	NA	1583	23660	217	4.31412	NA	NA	8.52515	4.00479	0.0674	7.46782	NA	NA	1.09008	8.47388	0.1173	4.00479	-0.14754	NA	NA	850.159	155.717	156.605	715.004	27.1037	28.3784	748.544	44.9046	45.5815	NA	NA	NA	23.2608	15.8975		715.004	27.1037	3.7907	28.3784	3.9161
UK012	UK012_433	NA	4890	76400	595	3.99329	NA	NA	8.27815	3.90949	0.0611	6.0859	NA	NA	1.01768	7.23341	0.1208	3.90949	0.45374	NA	NA	642.756	131.112	132.234	735.167	27.1631	28.5021	712.744	37.0616	37.8258	NA	NA	NA	19.2126	-14.3772		735.167	27.1631	3.69482	28.5021	3.90632
UK012	UK012_147	NA	1490	21710	157.3	2.25036	NA	NA	8.09717	4.05332	0.0673	7.35647	NA	NA	1.146	8.39923	0.1235	4.05332	0.24541	NA	NA	847.072	153.456	154.358	750.677	28.7228	30.0421	775.351	45.5738	46.2729	NA	NA	NA	30.2489	11.3797		750.677	28.7228	3.82625	30.0421	3.97388
UK012	UK012_387	NA	2880	41900	336	8.93617	NA	NA	7.60456	4.2416	0.069	7.02232	NA	NA	1.25105	8.20391	0.1315	4.2416	0.57009	NA	NA	898.74	145.257	146.193	796.417	31.7777	33.1132	823.88	46.3278	47.0725	NA	NA	NA	15.72	11.3852		796.417	31.7777	3.99008	33.1132	4.14372
UK012	UK012_380	NA	11490	162000	1318	3.61096	NA	NA	7.59301	3.75766	0.0719	5.2602	NA	NA	1.30562	6.4645	0.1317	3.75766	0.29447	NA	NA	983.111	107.265	108.49	797.556	28.1899	29.6912	848.199	37.1867	38.1443	NA	NA	NA	1.12448	18.8743		797.556	28.1899	3.53453	29.6912	3.65489
UK012	UK012_607	NA	9800	134700	1155	4.54545	NA	NA	7.55287	3.90189	0.0716	5.51651	NA	NA	1.30708	6.75697	0.1324	3.90189	0.020696	NA	NA	974.592	112.656	113.827	801.542	29.4093	30.8645	848.843	38.8896	39.8073	NA	NA	NA	5.20812	17.7561		801.542	29.4093	3.66908	30.8645	3.77279
UK012	UK012_182	NA	5980	93000	586	32.5556	NA	NA	7.4184	3.82225	0.0629	6.1016	NA	NA	1.16907	7.19994	0.1348	3.82225	0.15221	NA	NA	704.851	130.11	131.218	815.19	29.2692	30.777	786.211	39.4225	40.243	NA	NA	NA	19.8686	-15.6542		815.19	29.2692	3.59047	30.777	3.82156
UK012	UK012_461	NA	4040	59030	373	1.43351	NA	NA	7.22022	3.85017	0.0677	6.28054	NA	NA	1.29282	7.36675	0.1385	3.85017	0.094778	NA	NA	859.383	130.649	131.699	836.175	30.1938	31.7274	842.549	42.2012	43.0407	NA	NA	NA	79.6981	2.70062		836.175	30.1938	3.61095	31.7274	3.78508
UK012	UK012_333	NA	4750	66700	444.3	2.33965	NA	NA	7.0922	3.93454	0.0694	6.19795	NA	NA	1.34921	7.34133	0.141	3.93454	0.36434	NA	NA	910.653	127.888	128.944	850.315	31.3436	32.8695	867.218	42.8371	43.6951	NA	NA	NA	43.2341	6.62582		850.315	31.3436	3.68612	32.8695	3.8456
UK012	UK012_499	NA	3590	54000	324	1.97561	NA	NA	7.03235	3.89965	0.0629	6.45676	NA	NA	1.23325	7.54301	0.1422	3.89965	0.05388	NA	NA	704.851	137.719	138.767	857.091	31.2972	32.8476	815.818	42.3194	43.1228	NA	NA	NA	10.4354	-21.5988		857.091	31.2972	3.65156	32.8476	3.89937
UK012	UK012_124	NA	4270	61990	423	15.8427	NA	NA	7.02247	3.93072	0.0686	6.20547	NA	NA	1.3469	7.34564	0.1424	3.93072	0.076244	NA	NA	886.736	128.525	129.583	858.22	31.5853	33.126	866.219	42.831	43.6879	NA	NA	NA	75.5187	3.21585		858.22	31.5853	3.68033	33.126	3.8477
UK012	UK012_521	NA	3700	52200	343	1.94114	NA	NA	6.87285	4.02783	0.0702	6.39244	NA	NA	1.40832	7.55557	0.1455	4.02783	0.29991	NA	NA	934.209	131.436	132.457	875.689	32.9808	34.5146	892.45	44.8918	45.7413	NA	NA	NA	47.7877	6.26412		875.689	32.9808	3.76627	34.5146	3.92006
UK012	UK012_457	NA	6070	83200	496	4.69253	NA	NA	6.85871	4.00157	0.0737	5.88674	NA	NA	1.48158	7.11802	0.1458	4.00157	0.4482	NA	NA	1033.26	119.172	120.262	877.377	32.8247	34.3709	922.879	43.1766	44.096	NA	NA	NA	2.78125	15.0869		877.377	32.8247	3.74124	34.3709	3.86901
UK012	UK012_363	NA	5020	71400	520	3.18043	NA	NA	6.84463	3.88167	0.0707	6.02294	NA	NA	1.4242	7.16542	0.1461	3.88167	0.6702	NA	NA	948.752	123.529	124.608	879.064	31.8983	33.4929	899.123	42.7691	43.668	NA	NA	NA	21.209	7.3452		879.064	31.8983	3.62867	33.4929	3.80284
UK012	UK012_4	NA	5210	72400	388.7	5.47465	NA	NA	6.81199	3.9628	0.0711	5.84006	NA	NA	1.43912	7.05762	0.1468	3.9628	0.37167	NA	NA	960.29	119.55	120.66	883.001	32.7011	34.271	905.353	42.3061	43.2223	NA	NA	NA	29.8449	8.04854		883.001	32.7011	3.7034	34.271	3.85255
UK012	UK012_134	NA	7770	106100	658	1.76882	NA	NA	6.81199	3.90922	0.0742	5.83431	NA	NA	1.50187	7.0229	0.1468	3.90922	0.27042	NA	NA	1046.91	117.863	118.96	883.001	32.259	33.8494	931.144	42.8323	43.7689	NA	NA	NA	3.8914	15.6567		883.001	32.259	3.65334	33.8494	3.77252
UK012	UK012_165	NA	5170	67700	405	9.18367	NA	NA	6.80272	3.97366	0.0726	6.00809	NA	NA	1.47148	7.20328	0.147	3.97366	0.27313	NA	NA	1002.81	122.203	123.276	884.125	32.8297	34.3974	918.737	43.5737	44.4799	NA	NA	NA	14.2511	11.8351		884.125	32.8297	3.71324	34.3974	3.84529
UK012	UK012_281	NA	888	11020	63	2.76074	NA	NA	6.71141	5.48607	0.0775	9.2996	NA	NA	1.59217	10.7972	0.149	5.48607	0.083897	NA	NA	1134.09	185.963	186.649	895.355	45.862	47.0237	967.147	67.438	68.0669	NA	NA	NA	7.12209	21.0504		895.355	45.862	5.12221	47.0237	5.13567
UK012	UK012_525	NA	3700	50600	328	2.33951	NA	NA	6.68003	3.84934	0.0714	6.4844	NA	NA	1.47374	7.54088	0.1497	3.84934	0.23311	NA	NA	968.887	132.623	133.623	899.281	32.3106	33.9524	919.665	45.6469	46.5141	NA	NA	NA	41.133	7.18409		899.281	32.3106	3.59294	33.9524	3.75165
UK012	UK012_600	NA	10760	146000	1092	2.4106	NA	NA	6.66223	3.91155	0.0692	5.5507	NA	NA	1.43215	6.79046	0.1501	3.91155	0.77901	NA	NA	904.708	114.591	115.768	901.524	32.9091	34.5297	902.447	40.6218	41.5711	NA	NA	NA	94.2275	0.351938		901.524	32.9091	3.65038	34.5297	3.8299
UK012	UK012_612	NA	6190	86800	630	2.46962	NA	NA	6.47249	3.82077	0.0717	5.96283	NA	NA	1.52739	7.08192	0.1545	3.82077	0.59197	NA	NA	977.437	121.751	122.836	926.139	32.9615	34.6609	941.449	43.4834	44.4187	NA	NA	NA	39.4299	5.24822		926.139	32.9615	3.55903	34.6609	3.73171
UK012	UK012_621	NA	5540	73700	519	1.43767	NA	NA	6.43501	4.07777	0.0753	5.95863	NA	NA	1.61342	7.22035	0.1554	4.07777	0.34688	NA	NA	1076.52	119.85	120.919	931.163	35.3561	36.9611	975.437	45.2913	46.2289	NA	NA	NA	6.09538	13.5026		931.163	35.3561	3.79698	36.9611	3.91374
UK012	UK012_214	NA	3550	49800	276	2.12963	NA	NA	6.40615	4.08772	0.0703	6.11382	NA	NA	1.51307	7.35447	0.1561	4.08772	0.4784	NA	NA	937.128	125.626	126.692	935.067	35.5804	37.188	935.681	44.9904	45.8885	NA	NA	NA	97.6618	0.219961		935.067	35.5804	3.80512	37.188	3.9763
UK012	UK012_409	NA	15150	208600	1375	2.51371	NA	NA	6.28931	3.83647	0.0715	5.19787	NA	NA	1.56749	6.46037	0.159	3.83647	0.1124	NA	NA	971.742	106.175	107.417	951.217	33.9287	35.664	957.433	40.069	41.1023	NA	NA	NA	80.1855	2.11222		951.217	33.9287	3.56688	35.664	3.73938
UK012	UK012_496	NA	2310	30900	167	1.36773	NA	NA	6.28536	3.79769	0.0696	6.91551	NA	NA	1.52679	7.88966	0.1591	3.79769	0.24085	NA	NA	916.575	142.637	143.585	951.773	33.604	35.357	941.211	48.4427	49.2842	NA	NA	NA	68.2923	-3.84016		951.773	33.604	3.53067	35.357	3.72635
UK012	UK012_452	NA	23950	327800	1810	3.06261	NA	NA	6.26174	4.06026	0.0724	4.81838	NA	NA	1.59421	6.301	0.1597	4.06026	0.54496	NA	NA	997.206	98.0196	99.3524	955.109	36.0442	37.6944	967.945	39.3366	40.4022	NA	NA	NA	47.746	4.22147		955.109	36.0442	3.77383	37.6944	3.92565
UK012	UK012_464	NA	10170	129600	710	6.43699	NA	NA	6.2422	3.82801	0.0784	5.37755	NA	NA	1.73173	6.60088	0.1602	3.82801	-0.066564	NA	NA	1157.03	106.841	108.009	957.888	34.0741	35.8243	1020.39	42.5136	43.5645	NA	NA	NA	2.77678	17.2113		957.888	34.0741	3.55721	35.8243	3.6484
UK012	UK012_175	NA	7860	102500	553	9.15563	NA	NA	6.22665	3.93586	0.072	5.54619	NA	NA	1.59433	6.80082	0.1606	3.93586	0.52109	NA	NA	985.941	113.067	114.23	960.11	35.1095	36.8177	967.995	42.4617	43.4512	NA	NA	NA	68.2501	2.61985		960.11	35.1095	3.65682	36.8177	3.82521
UK012	UK012_255	NA	12030	160700	868	2.20305	NA	NA	6.18429	3.85506	0.0727	5.31448	NA	NA	1.62086	6.56545	0.1617	3.85506	0.76655	NA	NA	1005.6	108.003	109.212	966.217	34.5915	36.3441	978.324	41.2511	42.2815	NA	NA	NA	36.5578	3.91654		966.217	34.5915	3.5801	36.3441	3.75549
UK012	UK012_211	NA	5720	76300	400	1.31492	NA	NA	6.16523	3.9041	0.073	6.1882	NA	NA	1.63258	7.31682	0.1622	3.9041	-0.25991	NA	NA	1013.95	125.668	126.709	968.991	35.1248	36.861	982.855	46.1045	47.0344	NA	NA	NA	66.94	4.43428		968.991	35.1248	3.62488	36.861	3.78285
UK012	UK012_578	NA	9900	143400	1012	2.45036	NA	NA	6.15385	3.91254	0.0675	5.52008	NA	NA	1.51237	6.76604	0.1625	3.91254	-0.36364	NA	NA	853.24	114.883	116.076	970.655	35.2567	36.9921	935.398	41.3789	42.3529	NA	NA	NA	26.3407	-13.7611		970.655	35.2567	3.63226	36.9921	3.87393
UK012	UK012_539	NA	5580	74100	465	2.4853	NA	NA	6.05694	3.88141	0.0768	6.28951	NA	NA	1.74827	7.39076	0.1651	3.88141	0.30975	NA	NA	1116	125.79	126.798	985.057	35.4565	37.2292	1026.53	47.7737	48.7182	NA	NA	NA	9.97368	11.7334		985.057	35.4565	3.59944	37.2292	3.7356
UK012	UK012_201	NA	4920	69800	366	4.14027	NA	NA	5.9988	3.87866	0.0701	6.21888	NA	NA	1.61122	7.32929	0.1667	3.87866	0.42667	NA	NA	931.284	127.91	128.959	993.903	35.7257	37.5142	974.583	45.9515	46.8751	NA	NA	NA	38.3592	-6.72401		993.903	35.7257	3.59448	37.5142	3.79656
UK012	UK012_450	NA	3820	48000	258.2	1.47543	NA	NA	5.98802	4.06815	0.0786	6.52064	NA	NA	1.80984	7.6856	0.167	4.06815	0.059166	NA	NA	1162.08	129.549	130.516	995.561	37.5288	39.2405	1049.02	50.3062	51.2268	NA	NA	NA	8.25762	14.3294		995.561	37.5288	3.76962	39.2405	3.87179
UK012	UK012_441	NA	13500	189200	1026	1.98453	NA	NA	5.94884	3.84619	0.0702	5.34851	NA	NA	1.62707	6.58785	0.1681	3.84619	0.10243	NA	NA	934.209	109.897	111.112	1001.63	35.6813	37.4972	980.727	41.4523	42.4809	NA	NA	NA	41.8359	-7.21738		1001.63	35.6813	3.56231	37.4972	3.77696
UK012	UK012_488	NA	6020	79700	410	3.73066	NA	NA	5.92066	3.86721	0.0718	5.95601	NA	NA	1.67207	7.10137	0.1689	3.86721	-0.30439	NA	NA	980.277	121.558	122.644	1006.05	36.0224	37.8363	997.974	45.1507	46.1168	NA	NA	NA	80.5765	-2.62892		1006.05	36.0224	3.58059	37.8363	3.77348
UK012	UK012_544	NA	7070	96400	613.9	4.51729	NA	NA	5.89623	3.88178	0.0769	5.68053	NA	NA	1.79826	6.88016	0.1696	3.88178	0.43576	NA	NA	1118.6	113.522	114.636	1009.91	36.2863	38.1001	1044.83	44.9238	45.9471	NA	NA	NA	11.31	9.71669		1009.91	36.2863	3.59303	38.1001	3.73395
UK012	UK012_27	NA	8830	115000	588	3.20261	NA	NA	5.82751	3.92912	0.0764	5.3736	NA	NA	1.80764	6.65684	0.1716	3.92912	0.73248	NA	NA	1105.57	107.576	108.755	1020.92	37.0985	38.9095	1048.22	43.5447	44.6033	NA	NA	NA	7.1907	7.65673		1020.92	37.0985	3.63382	38.9095	3.79306
UK012	UK012_196	NA	4100	52700	263.9	3.22222	NA	NA	5.81058	4.08384	0.0751	6.44099	NA	NA	1.78206	7.62654	0.1721	4.08384	-0.068832	NA	NA	1071.18	129.697	130.689	1023.67	38.6552	40.405	1038.93	49.6431	50.5655	NA	NA	NA	63.9336	4.43509		1023.67	38.6552	3.77614	40.405	3.92471
UK012	UK012_412	NA	6530	87400	524	2.7521	NA	NA	5.81058	3.8624	0.074	5.71591	NA	NA	1.75596	6.89854	0.1721	3.8624	0.082668	NA	NA	1041.47	115.558	116.678	1023.67	36.5592	38.4046	1029.36	44.6589	45.6708	NA	NA	NA	83.7177	1.70876		1023.67	36.5592	3.57138	38.4046	3.74351
UK012	UK012_24	NA	25470	332300	1729	3.14936	NA	NA	5.8072	3.84788	0.0748	4.75575	NA	NA	1.77597	6.11747	0.1722	3.84788	0.13122	NA	NA	1063.13	95.781	97.1175	1024.22	36.4398	38.2927	1036.71	39.7598	40.9017	NA	NA	NA	61.9953	3.66005		1024.22	36.4398	3.55781	38.2927	3.71846
UK012	UK012_209	NA	4410	57000	281.8	1.55433	NA	NA	5.80383	3.97481	0.0767	6.03463	NA	NA	1.82214	7.22606	0.1723	3.97481	0.046502	NA	NA	1113.4	120.718	121.769	1024.77	37.6605	39.4579	1053.46	47.4078	48.3879	NA	NA	NA	33.4443	7.96022		1024.77	37.6605	3.67501	39.4579	3.81045
UK012	UK012_330	NA	1248	15680	82.9	1.79437	NA	NA	5.74713	4.05391	0.0792	8.25611	NA	NA	1.9001	9.19769	0.174	4.05391	-0.14839	NA	NA	1177.14	163.892	164.658	1034.11	38.7328	40.5115	1081.12	61.263	62.0486	NA	NA	NA	22.7792	12.1502		1034.11	38.7328	3.74551	40.5115	3.86439
UK012	UK012_233	NA	4220	57900	290.6	2.23711	NA	NA	5.71755	3.83778	0.0718	6.44281	NA	NA	1.73147	7.49922	0.1749	3.83778	0.19839	NA	NA	980.277	131.537	132.543	1039.05	36.8292	38.7115	1020.3	48.305	49.233	NA	NA	NA	49.0407	-5.99583		1039.05	36.8292	3.5445	38.7115	3.74885
UK012	UK012_549	NA	2510	32470	199.1	5.53056	NA	NA	5.63063	4.09735	0.0822	6.49956	NA	NA	2.01287	7.68327	0.1776	4.09735	0.23339	NA	NA	1250.29	127.488	128.445	1053.85	39.8357	41.6272	1119.86	52.1667	53.122	NA	NA	NA	2.424	15.7113		1053.85	39.8357	3.78001	41.6272	3.87527
UK012	UK012_212	NA	6040	83000	399	3.30846	NA	NA	5.60538	3.94089	0.0717	5.90739	NA	NA	1.76366	7.10126	0.1784	3.94089	0.29546	NA	NA	977.437	120.615	121.71	1058.23	38.4609	40.3275	1032.19	46.0462	47.0314	NA	NA	NA	30.0334	-8.26554		1058.23	38.4609	3.63447	40.3275	3.84725
UK012	UK012_503	NA	4660	60700	305	2.43805	NA	NA	5.5991	3.8902	0.0703	6.22686	NA	NA	1.73116	7.34217	0.1786	3.8902	0.41087	NA	NA	937.128	127.959	129.005	1059.32	38.0023	39.8939	1020.18	47.2888	48.2361	NA	NA	NA	9.25239	-13.0391		1059.32	38.0023	3.58742	39.8939	3.81378
UK012	UK012_122	NA	2600	35200	188.7	1.58838	NA	NA	5.58971	3.92235	0.0746	6.6533	NA	NA	1.84014	7.72342	0.1789	3.92235	0.49792	NA	NA	1057.74	134.264	135.227	1060.96	38.371	40.2505	1059.91	50.8526	51.7743	NA	NA	NA	96.3474	-0.304219		1060.96	38.371	3.61662	40.2505	3.79466
UK012	UK012_176	NA	3280	38300	184.1	1.62346	NA	NA	5.57103	4.0045	0.0798	6.69095	NA	NA	1.97501	7.79774	0.1795	4.0045	0.10253	NA	NA	1192.05	132.368	133.307	1064.24	39.286	41.1339	1107.02	52.61	53.5456	NA	NA	NA	17.3579	10.7216		1064.24	39.286	3.69145	41.1339	3.81432
UK012	UK012_454	NA	1890	25350	125.5	2.53535	NA	NA	5.56174	3.99371	0.0742	7.13593	NA	NA	1.83948	8.17748	0.1798	3.99371	-0.29962	NA	NA	1046.91	144.291	145.192	1065.88	39.2357	41.0909	1059.67	53.8409	54.7123	NA	NA	NA	86.922	-1.81196		1065.88	39.2357	3.68105	41.0909	3.86371
UK012	UK012_430	NA	7040	91200	483	1.18382	NA	NA	5.5371	3.90252	0.0744	5.97547	NA	NA	1.85264	7.13694	0.1806	3.90252	0.050069	NA	NA	1052.34	120.627	121.698	1070.25	38.4843	40.388	1064.37	47.0975	48.0953	NA	NA	NA	84.2602	-1.70228		1070.25	38.4843	3.59581	40.388	3.78194
UK012	UK012_629	NA	8570	110900	664	2.62658	NA	NA	5.50661	4.00839	0.0775	5.54652	NA	NA	1.94052	6.84333	0.1816	4.00839	0.68223	NA	NA	1134.09	110.581	111.719	1075.71	39.7136	41.5781	1095.18	45.8867	46.9431	NA	NA	NA	26.2378	5.14736		1075.71	39.7136	3.69185	41.5781	3.84706
UK012	UK012_161	NA	1690	22730	107.5	1.76519	NA	NA	5.38213	4.14538	0.0718	7.87313	NA	NA	1.83938	8.89778	0.1858	4.14538	0.058837	NA	NA	980.277	160.921	161.747	1098.58	41.8719	43.7126	1059.64	58.5924	59.3946	NA	NA	NA	26.1476	-12.0686		1098.58	41.8719	3.81145	43.7126	4.0274
UK012	UK012_309	NA	3800	50500	233.4	2.08766	NA	NA	5.38213	3.90896	0.0744	6.71204	NA	NA	1.90599	7.76734	0.1858	3.90896	0.18998	NA	NA	1052.34	135.566	136.521	1098.58	39.4838	41.4308	1083.18	51.7731	52.701	NA	NA	NA	59.934	-4.39449		1098.58	39.4838	3.59407	41.4308	3.78953
UK012	UK012_388	NA	30820	394800	2211	1.00959	NA	NA	5.28821	3.84074	0.0784	4.71724	NA	NA	2.04413	6.08306	0.1891	3.84074	0.20017	NA	NA	1157.03	93.6884	95.0169	1116.5	39.3742	41.3836	1130.34	41.4992	42.7044	NA	NA	NA	58.9004	3.50294		1116.5	39.3742	3.52658	41.3836	3.68538
UK012	UK012_414	NA	2860	35030	188.1	1.7662	NA	NA	5.28541	3.93483	0.0797	6.43093	NA	NA	2.07913	7.53922	0.1892	3.93483	0.72359	NA	NA	1189.57	127.247	128.223	1117.04	40.3568	42.3212	1141.95	51.7351	52.7187	NA	NA	NA	16.8509	6.09749		1117.04	40.3568	3.61283	42.3212	3.78336
UK012	UK012_291	NA	5840	74400	332.8	2.88388	NA	NA	5.23013	3.87764	0.0787	5.89547	NA	NA	2.07474	7.05639	0.1912	3.87764	0.42943	NA	NA	1164.6	117.037	118.104	1127.87	40.1231	42.1329	1140.5	48.3834	49.4319	NA	NA	NA	59.7946	3.15366		1127.87	40.1231	3.55742	42.1329	3.72168
UK012	UK012_264	NA	2663	34550	151.4	1.00265	NA	NA	5.15996	3.99397	0.077	6.46803	NA	NA	2.05753	7.60179	0.1938	3.99397	0.58004	NA	NA	1121.19	129.277	130.257	1141.93	41.7976	43.7738	1134.8	51.9877	52.9601	NA	NA	NA	74.4843	-1.84962		1141.93	41.7976	3.66027	43.7738	3.83952
UK012	UK012_267	NA	2230	28950	127.1	1.98905	NA	NA	5.10725	4.06499	0.0777	7.93487	NA	NA	2.09766	8.91551	0.1958	4.06499	0.19242	NA	NA	1139.21	158.352	159.152	1152.72	42.908	44.868	1148.04	61.3771	62.2143	NA	NA	NA	88.9988	-1.18548		1152.72	42.908	3.72233	44.868	3.89699
UK012	UK012_575	NA	13600	167700	964	1.46728	NA	NA	5.03271	3.84235	0.0798	5.15304	NA	NA	2.18626	6.42787	0.1987	3.84235	0.2291	NA	NA	1192.05	101.845	103.057	1168.33	41.059	43.1527	1176.67	44.8125	45.9801	NA	NA	NA	75.4873	1.98955		1168.33	41.059	3.51433	43.1527	3.68193
UK012	UK012_127	NA	4690	56400	262.1	2.73021	NA	NA	4.90436	3.9865	0.0831	6.05774	NA	NA	2.33625	7.25179	0.2039	3.9865	0.32716	NA	NA	1271.57	118.426	119.449	1196.24	43.5255	45.5909	1223.38	51.6071	52.6668	NA	NA	NA	33.0746	5.92408		1196.24	43.5255	3.63853	45.5909	3.77987
UK012	UK012_239	NA	4770	60560	254.8	1.6219	NA	NA	4.80538	3.88066	0.0779	6.22105	NA	NA	2.23517	7.33219	0.2081	3.88066	0.20103	NA	NA	1144.32	123.895	124.91	1218.69	43.0922	45.2475	1192.14	51.4812	52.5155	NA	NA	NA	37.4886	-6.49845		1218.69	43.0922	3.53596	45.2475	3.74537
UK012	UK012_274	NA	2380	28850	100.1	2.24439	NA	NA	4.15282	3.94262	0.0841	6.79734	NA	NA	2.79225	7.85799	0.2408	3.94262	0.13926	NA	NA	1294.87	132.512	133.422	1390.85	49.3248	51.7167	1353.46	58.8144	59.8451	NA	NA	NA	29.103	-7.41292		1294.87	132.512	10.2336	133.422	9.69982
UK012	UK012_139	NA	8340	98300	422	2.17526	NA	NA	4.4843	3.91155	0.0847	5.63051	NA	NA	2.60429	6.85587	0.223	3.91155	0.26287	NA	NA	1308.68	109.468	110.561	1297.71	45.9783	48.2426	1301.85	50.3405	51.4956	NA	NA	NA	88.7584	0.838395		1308.68	109.468	8.36477	110.561	8.50782
UK012	UK012_100	NA	5510	66600	317	2.6594	NA	NA	4.47828	3.83482	0.0856	5.94451	NA	NA	2.6355	7.07411	0.2233	3.83482	0.56243	NA	NA	1329.17	115.262	116.295	1299.29	45.126	47.4359	1310.6	52.1173	53.2414	NA	NA	NA	62.263	2.2478		1329.17	115.262	8.67174	116.295	8.92487
UK012	UK012_472	NA	5480	61830	237.4	2.43487	NA	NA	4.3535	3.88322	0.0882	6.10603	NA	NA	2.79339	7.23623	0.2297	3.88322	0.62149	NA	NA	1386.84	117.458	118.457	1332.93	46.7606	49.0963	1353.77	54.1574	55.2744	NA	NA	NA	34.989	3.88778		1386.84	117.458	8.46947	118.457	8.8462
UK012	UK012_94	NA	2130	23920	110.6	1.49459	NA	NA	4.33276	3.93256	0.092	7.14885	NA	NA	2.92769	8.15911	0.2308	3.93256	0.027428	NA	NA	1467.39	136.109	136.955	1338.69	47.539	49.8557	1389.1	61.8297	62.8355	NA	NA	NA	19.4091	8.77039		1467.39	136.109	9.27558	136.955	10.0951
UK012	UK012_394	NA	11500	118400	508	1.66013	NA	NA	4.10846	3.88366	0.0961	5.32781	NA	NA	3.22512	6.59306	0.2434	3.88366	0.43418	NA	NA	1549.73	100.212	101.328	1404.35	49.0092	51.4567	1463.21	51.1435	52.4113	NA	NA	NA	2.83455	9.38097		1549.73	100.212	6.46641	101.328	7.08596
UK012	UK012_341	NA	2480	22800	94	1.62069	NA	NA	3.70782	4.1196	0.0993	7.02077	NA	NA	3.69259	8.14017	0.2697	4.1196	0.051522	NA	NA	1611.01	131.135	131.98	1539.28	56.411	58.9214	1569.77	65.1294	66.1941	NA	NA	NA	46.9252	4.45229		1611.01	131.135	8.13997	131.98	8.50378
UK012	UK012_153	NA	4710	44200	119.2	1.50126	NA	NA	3.02572	3.85371	0.1041	6.05714	NA	NA	4.74377	7.17914	0.3305	3.85371	0.21037	NA	NA	1698.47	111.803	112.769	1840.8	61.7117	64.8405	1775.01	60.2752	61.5386	NA	NA	NA	8.40211	-8.38019		1698.47	111.803	6.5826	112.769	6.2452
UK012	UK012_42	NA	7160	61100	185.1	1.14755	NA	NA	3.03122	3.81955	0.1171	5.70143	NA	NA	5.32648	6.8626	0.3299	3.81955	-0.19488	NA	NA	1912.43	102.485	103.482	1837.9	61.0812	64.2323	1873.12	58.7328	60.0787	NA	NA	NA	44.8162	3.89708		1912.43	102.485	5.35888	103.482	5.57586
UK012	UK012_545	NA	11460	101200	337.5	3.11347	NA	NA	3.16556	3.84901	0.1172	5.22876	NA	NA	5.1048	6.49267	0.3159	3.84901	0.43408	NA	NA	1913.96	93.948	95.0339	1769.68	59.5671	62.5944	1836.9	55.1808	56.5912	NA	NA	NA	2.86116	7.53844		1913.96	93.948	4.90857	95.0339	5.26198
UK012	UK012_365	NA	23110	196600	616	1.97057	NA	NA	2.93255	4.01095	0.1204	4.78235	NA	NA	5.66086	6.24168	0.341	4.01095	0.43327	NA	NA	1962.16	85.4207	86.5992	1891.48	65.7515	68.8347	1925.42	53.9127	55.4021	NA	NA	NA	29.2673	3.6021		1962.16	85.4207	4.35341	86.5992	4.52475
UK012	UK012_247	NA	12700	99670	241.7	2.33527	NA	NA	2.74198	3.80955	0.1228	5.18574	NA	NA	6.17498	6.43464	0.3647	3.80955	0.61904	NA	NA	1997.3	92.264	93.3481	2004.41	65.6304	69.0336	2000.91	56.2877	57.7523	NA	NA	NA	89.6579	-0.35607		1997.3	92.264	4.61943	93.3481	4.66282
UK012	UK012_190	NA	5830	44150	101.1	0.991176	NA	NA	2.6824	3.92397	0.1288	5.90321	NA	NA	6.62053	7.0884	0.3728	3.92397	0.17937	NA	NA	2081.66	104.056	105.001	2042.56	68.6956	72.0579	2062.09	62.6088	63.9549	NA	NA	NA	64.3244	1.8781		2081.66	104.056	4.99869	105.001	5.11366
UK012	UK012_551	NA	19260	149500	452	4.02493	NA	NA	2.77162	3.78828	0.1348	4.94407	NA	NA	6.70591	6.22855	0.3608	3.78828	-0.35524	NA	NA	2161.43	86.3321	87.4471	1985.96	64.7511	68.1456	2073.4	55.0905	56.6189	NA	NA	NA	7.85469	8.11792		2161.43	86.3321	3.99422	87.4471	4.29943
UK012	UK012_117	NA	12320	86300	214	2.1748	NA	NA	2.52525	3.98342	0.1447	5.18384	NA	NA	7.90069	6.53757	0.396	3.98342	0.63171	NA	NA	2284.21	89.3295	90.3797	2150.59	72.8454	76.3076	2219.76	58.9897	60.4775	NA	NA	NA	1.68142	5.8497		2284.21	89.3295	3.91073	90.3797	4.1041
UK012	UK012_293	NA	5920	35200	67.5	1.21403	NA	NA	2.21729	4.08665	0.1609	5.9437	NA	NA	10.0054	7.21306	0.451	4.08665	0.55605	NA	NA	2465.14	100.557	101.458	2399.7	81.8877	85.5897	2435.28	66.681	68.0665	NA	NA	NA	31.7808	2.65474		2465.14	100.557	4.07917	101.458	4.18386
UK012	UK012_164	NA	23520	124900	235.7	1.48613	NA	NA	2.11416	3.91063	0.1742	4.94437	NA	NA	11.3608	6.30395	0.473	3.91063	0.10144	NA	NA	2598.41	82.5166	83.5821	2496.7	80.9554	84.9443	2553.21	58.8968	60.493	NA	NA	NA	23.5301	3.91419		2598.41	82.5166	3.17566	83.5821	3.29833
UK012	UK012_141	NA	21230	119500	224.6	1.59291	NA	NA	2.03666	3.87029	0.1743	4.86669	NA	NA	11.7999	6.21803	0.491	3.87029	0.15052	NA	NA	2599.37	81.21	82.292	2575	82.1655	86.2968	2588.66	58.2681	59.8905	NA	NA	NA	76.9635	0.937383		2599.37	81.21	3.12422	82.292	3.18414
UK012	UK012_103	NA	26120	127400	233.8	4.12346	NA	NA	1.79533	3.93947	0.2156	4.6866	NA	NA	16.5579	6.12238	0.557	3.93947	0.46744	NA	NA	2948.12	75.742	76.8294	2854.22	90.8554	95.2684	2909.58	58.6903	60.3753	NA	NA	NA	17.5391	3.18497		2948.12	75.742	2.56916	76.8294	2.64811
UK012	UK012_168	NA	35700	144000	211.4	1.80068	NA	NA	1.65017	3.96006	0.2336	4.57224	NA	NA	19.5185	6.04876	0.606	3.96006	0.49024	NA	NA	3076.88	73.0886	74.1905	3053.97	96.334	100.966	3067.8	58.4894	60.2091	NA	NA	NA	74.3655	0.744624		3076.88	73.0886	2.37541	74.1905	2.41937
UK012	UK012_25	NA	317	3660	215.3	1.19611	NA	NA	64.6831	4.10764	0.085	11.6131	NA	NA	0.181188	12.3182	0.01546	4.10764	0.090049	NA	NA	NA	NA	NA	98.899	4.03141	4.21183	169.082	19.1884	19.3256	NA	NA	NA	1.69149e-10	NA
UK012	UK012_26	NA	522	8650	599	1.08123	NA	NA	78.0031	4.09239	0.0589	9.75965	NA	NA	0.104113	10.5829	0.01282	4.09239	0.35088	NA	NA	NA	NA	NA	82.1178	3.33926	3.4898	100.566	10.1331	10.2311	NA	NA	NA	0.0117276	NA
UK012	UK012_29	NA	19380	161100	842	3.01144	NA	NA	5.70776	3.84409	0.1189	4.9832	NA	NA	2.87222	6.29359	0.1752	3.84409	0.26441	NA	NA	1939.76	89.2517	90.3866	1040.7	36.9435	38.8257	1374.65	47.4353	48.724	NA	NA	NA	2.32738e-30	46.3491
UK012	UK012_30	NA	1330	22180	1358	0.864968	NA	NA	67.6133	3.87818	0.059	8.33501	NA	NA	0.120315	9.19308	0.01479	3.87818	0.28539	NA	NA	NA	NA	NA	94.6443	3.64366	3.82612	115.358	10.025	10.1534	NA	NA	NA	0.00207595	NA
UK012	UK012_32	NA	274	2970	168.4	1.67063	NA	NA	61.3497	4.14833	0.093	12.3749	NA	NA	0.209012	13.0517	0.0163	4.14833	0.5918	NA	NA	NA	NA	NA	104.229	4.28901	4.47729	192.723	22.9145	23.0606	NA	NA	NA	4.0868e-14	NA
UK012	UK012_34	NA	3560	51700	641	7.17002	NA	NA	13.369	3.83385	0.0682	7.04587	NA	NA	0.703376	8.02139	0.0748	3.83385	-0.028691	NA	NA	NA	NA	NA	465.009	17.2	18.0809	540.805	33.6446	34.2097	NA	NA	NA	0.0106134	NA
UK012	UK012_48	NA	637	10430	722	1.23419	NA	NA	69.5894	4.13312	0.0632	9.21373	NA	NA	0.12522	10.0983	0.01437	4.13312	0.3104	NA	NA	NA	NA	NA	91.9757	3.77448	3.94136	119.794	11.4113	11.5325	NA	NA	NA	4.21208e-05	NA
UK012	UK012_49	NA	485	8650	406	1.46043	NA	NA	46.9263	4.16754	0.0594	10.5454	NA	NA	0.17453	11.3391	0.02131	4.16754	-0.12561	NA	NA	NA	NA	NA	135.93	5.60562	5.84948	163.343	17.1102	17.2545	NA	NA	NA	0.363879	NA
UK012	UK012_51	NA	1120	16750	193.2	1.37803	NA	NA	11.7096	4.10093	0.0708	9.41262	NA	NA	0.833667	10.2672	0.0854	4.10093	0.30118	NA	NA	951.645	193.525	194.223	528.275	20.8003	21.7342	615.645	47.4317	47.9199	NA	NA	NA	0.0230069	44.4883
UK012	UK012_52	NA	1630	24980	291.5	0.797101	NA	NA	11.5473	3.98231	0.07	7.69446	NA	NA	0.835829	8.66392	0.0866	3.98231	0.12511	NA	NA	928.353	158.513	159.365	535.398	20.4599	21.4327	616.841	40.0733	40.6511	NA	NA	NA	0.0202416	42.3282
UK012	UK012_57	NA	4700	62400	380	3.3101	NA	NA	5.81734	4.03898	0.0824	6.06109	NA	NA	1.95301	7.28355	0.1719	4.03898	0.5754	NA	NA	1255.04	118.772	119.796	1022.57	38.1927	39.9593	1099.48	48.9496	49.9459	NA	NA	NA	0.0272059	18.5228
UK012	UK012_59	NA	14	50	1.51	3.14583	NA	NA	30.303	22.9872	0.4	51.4047	NA	NA	1.82002	56.3103	0.033	22.9872	0.89656	NA	NA	NA	NA	NA	209.297	47.3396	47.4087	1052.69	386.682	386.828	NA	NA	NA	0.110232	NA
UK012	UK012_61	NA	219	3030	193	1.25406	NA	NA	60.241	4.794	0.079	15.8149	NA	NA	0.180816	16.5256	0.0166	4.794	-0.16421	NA	NA	NA	NA	NA	106.132	5.04632	5.21307	168.762	25.7	25.8023	NA	NA	NA	0.000624042	NA
UK012	UK012_62	NA	3974	50400	361.5	2.0309	NA	NA	6.96864	3.9499	0.087	6.12142	NA	NA	1.72136	7.28516	0.1435	3.9499	0.37041	NA	NA	1360.49	118.187	119.186	864.424	31.9539	33.4977	1016.53	46.8234	47.7758	NA	NA	NA	2.60813e-08	36.4625
UK012	UK012_63	NA	3300	58700	1405	1.45747	NA	NA	23.0521	3.83808	0.0608	6.68493	NA	NA	0.363659	7.70838	0.04338	3.83808	-0.12949	NA	NA	NA	NA	NA	273.75	10.2868	10.8124	314.943	20.8758	21.2551	NA	NA	NA	0.0866014	NA
UK012	UK012_64	NA	159	2754	207.6	1.24835	NA	NA	72.8863	4.12238	0.064	16.0106	NA	NA	0.12107	16.5328	0.01372	4.12238	-0.0095981	NA	NA	NA	NA	NA	87.8436	3.59669	3.75652	116.041	18.1312	18.2033	NA	NA	NA	0.263865	NA
UK012	UK012_65	NA	1357	25380	1057	1.33123	NA	NA	39.604	4.15355	0.0581	7.60207	NA	NA	0.202273	8.66276	0.02525	4.15355	0.042135	NA	NA	NA	NA	NA	160.751	6.5943	6.88307	187.048	14.7997	15.013	NA	NA	NA	0.108306	NA
UK012	UK012_72	NA	2320	31800	565	2.69048	NA	NA	17.0648	4.14054	0.077	6.5949	NA	NA	0.622142	7.78696	0.0586	4.14054	0.46569	NA	NA	NA	NA	NA	367.106	14.7755	15.4265	491.189	30.3339	30.8742	NA	NA	NA	3.37596e-16	NA
UK012	UK012_73	NA	3340	49800	426	4.50317	NA	NA	8.18331	4.0926	0.072	6.42188	NA	NA	1.21312	7.61511	0.1222	4.0926	0.49889	NA	NA	985.941	130.994	132.002	743.214	28.729	30.024	806.625	42.409	43.199	NA	NA	NA	0.0952554	24.6188
UK012	UK012_75	NA	1226	21300	372	4.94024	NA	NA	16.6389	3.99232	0.0616	7.93626	NA	NA	0.510454	8.88385	0.0601	3.99232	0.14413	NA	NA	NA	NA	NA	376.234	14.5905	15.2809	418.754	30.4938	30.9119	NA	NA	NA	0.853729	NA
UK012	UK012_76	NA	5130	74100	583	1.65156	NA	NA	7.49064	3.82394	0.0739	6.11757	NA	NA	1.36028	7.21437	0.1335	3.82394	0.2294	NA	NA	1038.74	123.761	124.81	807.801	29.033	30.5274	871.989	42.2419	43.1177	NA	NA	NA	0.544976	22.2324
UK012	UK012_79	NA	2250	38250	888	1.76892	NA	NA	22.0751	3.92614	0.0618	7.08514	NA	NA	0.386001	8.10023	0.0453	3.92614	0.49394	NA	NA	NA	NA	NA	285.601	10.9683	11.5046	331.444	22.91	23.2873	NA	NA	NA	0.000688997	NA
UK012	UK012_80	NA	93	1604	110.7	1.05529	NA	NA	66.1376	4.57351	0.062	14.8251	NA	NA	0.129254	15.5145	0.01512	4.57351	0.51433	NA	NA	NA	NA	NA	96.7403	4.3914	4.55059	123.427	18.0329	18.1144	NA	NA	NA	0.118925	NA
UK012	UK012_87	NA	140	1950	137.8	1.5518	NA	NA	66.2252	5.4472	0.076	12.957	NA	NA	0.158231	14.0554	0.0151	5.4472	-0.051228	NA	NA	NA	NA	NA	96.6132	5.22347	5.35765	149.154	19.4995	19.6067	NA	NA	NA	4.94109e-05	NA
UK012	UK012_91	NA	4440	59100	385	2.36341	NA	NA	6.18047	3.92339	0.0779	6.00624	NA	NA	1.73787	7.17411	0.1618	3.92339	0.79687	NA	NA	1144.32	119.6	120.651	966.772	35.2234	36.9478	1022.67	46.2704	47.2406	NA	NA	NA	0.0112659	15.5159
UK012	UK012_92	NA	450	4320	280.4	1.24346	NA	NA	59.5238	4.96198	0.117	15.004	NA	NA	0.271017	15.8032	0.0168	4.96198	0.29042	NA	NA	NA	NA	NA	107.4	5.28503	5.44822	243.506	34.2282	34.3773	NA	NA	NA	1.587e-12	NA
UK012	UK012_98	NA	11800	144500	791	1.22257	NA	NA	5.26316	3.82788	0.0845	5.28582	NA	NA	2.21366	6.52629	0.19	3.82788	0.69386	NA	NA	1304.09	102.813	103.976	1121.38	39.3993	41.4232	1185.37	45.6773	46.8322	NA	NA	NA	0.019791	14.0109
UK012	UK012_104	NA	1410	18400	275	2.33051	NA	NA	14.1643	4.16214	0.0809	8.04416	NA	NA	0.787507	9.05715	0.0706	4.16214	-0.016105	NA	NA	NA	NA	NA	439.769	17.6935	18.4651	589.757	40.5377	41.0729	NA	NA	NA	1.55472e-08	NA
UK012	UK012_106	NA	5630	84900	863	0.927957	NA	NA	9.87167	3.8383	0.0688	5.9835	NA	NA	0.960946	7.10878	0.1013	3.8383	0.0047432	NA	NA	892.749	123.792	124.887	622.023	22.7595	23.9224	683.787	35.3862	36.1414	NA	NA	NA	0.374492	30.325
UK012	UK012_110	NA	483	9080	738	1.66591	NA	NA	79.0514	4.00956	0.0568	9.19168	NA	NA	0.0990695	10.0281	0.01265	4.00956	0.56328	NA	NA	NA	NA	NA	81.0357	3.22883	3.38033	95.9171	9.17861	9.27748	NA	NA	NA	0.0164341	NA
UK012	UK012_112	NA	628	8850	481	1.13981	NA	NA	53.8213	4.24306	0.074	10.087	NA	NA	0.189574	10.9431	0.01858	4.24306	0.088366	NA	NA	NA	NA	NA	118.675	4.9894	5.19894	176.266	17.7093	17.8696	NA	NA	NA	4.12392e-08	NA
UK012	UK012_114	NA	218	3620	239	1.19202	NA	NA	64.1026	5.13096	0.063	14.6768	NA	NA	0.135508	15.5479	0.0156	5.13096	-0.39571	NA	NA	NA	NA	NA	99.7877	5.08064	5.22751	129.035	18.842	18.9267	NA	NA	NA	0.675254	NA
UK012	UK012_115	NA	470	7870	417	1.56355	NA	NA	52.356	4.71223	0.0588	10.5609	NA	NA	0.15485	11.5645	0.0191	4.71223	-0.11164	NA	NA	NA	NA	NA	121.965	5.69327	5.88788	146.185	15.7463	15.874	NA	NA	NA	0.559371	NA
UK012	UK012_120	NA	512	7510	345.5	1.21228	NA	NA	47.8469	5.17419	0.0669	10.4177	NA	NA	0.192785	11.6319	0.0209	5.17419	0.15665	NA	NA	NA	NA	NA	133.341	6.82848	7.02263	179.003	19.0916	19.2447	NA	NA	NA	0.000324182	NA
UK012	UK012_121	NA	5110	71200	611	3.62611	NA	NA	8.74891	4.00273	0.0726	5.95359	NA	NA	1.14415	7.17406	0.1143	4.00273	0.55115	NA	NA	1002.81	121.091	122.173	697.672	26.468	27.714	774.478	38.8898	39.705	NA	NA	NA	0.000563313	30.4282
UK012	UK012_126	NA	1873	2300	0.92	2.42105	NA	NA	0.389105	10.9473	0.824	7.5688	NA	NA	291.986	13.309	2.57	10.9473	0.86493	NA	NA	4963.8	107.826	108.423	8203.48	509.087	512.37	5767.5	135.475	136.315	NA	NA	NA	2.50106e-21	-65.2664
UK012	UK012_130	NA	471	7680	462	1.81176	NA	NA	64.8929	4.90069	0.0631	10.3409	NA	NA	0.134071	11.4434	0.01541	4.90069	0.23072	NA	NA	NA	NA	NA	98.5816	4.79442	4.94614	127.749	13.7374	13.8512	NA	NA	NA	0.00190481	NA
UK012	UK012_131	NA	1010	9080	399	0.737523	NA	NA	46.5333	4.37316	0.112	11.0158	NA	NA	0.331861	11.8521	0.02149	4.37316	0.25985	NA	NA	NA	NA	NA	137.066	5.93084	6.1656	290.985	29.995	30.2268	NA	NA	NA	9.05374e-21	NA
UK012	UK012_145	NA	90230	471200	882	7.77093	NA	NA	2.06911	3.83859	0.1878	3.96929	NA	NA	12.5145	5.52178	0.4833	3.83859	0.58118	NA	NA	2722.99	65.4408	66.7463	2541.62	80.6306	84.7504	2643.82	51.9639	53.7912	NA	NA	NA	0.176816	6.66058
UK012	UK012_146	NA	142	2030	116.6	1.60606	NA	NA	61.4628	4.62571	0.068	16.6576	NA	NA	0.152545	17.2879	0.01627	4.62571	0.42237	NA	NA	NA	NA	NA	104.039	4.77392	4.94316	144.156	23.2375	23.322	NA	NA	NA	0.0288289	NA
UK012	UK012_150	NA	2140	31800	578	1.48586	NA	NA	19.8807	3.95089	0.0669	7.47389	NA	NA	0.463976	8.45391	0.0503	3.95089	0.13244	NA	NA	NA	NA	NA	316.363	12.1974	12.7865	387.019	27.2115	27.6232	NA	NA	NA	0.000116019	NA
UK012	UK012_151	NA	326	4440	202.8	1.32117	NA	NA	49.776	4.45773	0.066	10.8818	NA	NA	0.182821	11.7594	0.02009	4.45773	0.47008	NA	NA	NA	NA	NA	128.225	5.65944	5.8752	170.485	18.4574	18.6022	NA	NA	NA	6.23341e-05	NA
UK012	UK012_154	NA	5480	69600	1106	1.48059	NA	NA	17.331	4.01345	0.0743	5.97464	NA	NA	0.591107	7.1975	0.0577	4.01345	-0.23372	NA	NA	NA	NA	NA	361.623	14.114	14.775	471.574	27.157	27.7223	NA	NA	NA	1.65467e-08	NA
UK012	UK012_157	NA	7200	75700	3350	0.744444	NA	NA	50	4.78647	0.09	13.8679	NA	NA	0.248184	14.6707	0.02	4.78647	0.96143	NA	NA	NA	NA	NA	127.656	6.05012	6.25066	225.1	29.6278	29.7774	NA	NA	NA	2.8026e-12	NA
UK012	UK012_158	NA	67100	354000	766	3.42576	NA	NA	2.41255	3.8478	0.1795	4.23237	NA	NA	10.2587	5.72001	0.4145	3.8478	0.7028	NA	NA	2648.26	70.2769	71.5117	2235.46	72.6894	76.386	2458.38	52.9693	54.7073	NA	NA	NA	2.23233e-16	15.5874
UK012	UK012_160	NA	344	470	0.172	0.0128358	NA	NA	0.285714	27.3447	0.78	12.5688	NA	NA	376.412	30.095	3.5	27.3447	0.99999	NA	NA	4885.65	180.369	180.735	9695.91	1392.28	1393.76	6024.61	314.451	314.854	NA	NA	NA	6.58877e-09	-98.4569
UK012	UK012_167	NA	600	9820	556	1.74843	NA	NA	65.1042	4.19764	0.0592	10.7006	NA	NA	0.125376	11.4945	0.01536	4.19764	-0.17769	NA	NA	NA	NA	NA	98.2642	4.0935	4.26908	119.934	13.0035	13.1102	NA	NA	NA	0.266059	NA
UK012	UK012_170	NA	192	2230	135.5	1.46963	NA	NA	68.4932	5.06238	0.074	14.9697	NA	NA	0.148966	15.8025	0.0146	5.06238	-0.001854	NA	NA	NA	NA	NA	93.4372	4.69603	4.83542	140.998	20.8064	20.8969	NA	NA	NA	0.00127138	NA
UK012	UK012_171	NA	204	2440	149.8	1.3781	NA	NA	70.5716	5.06108	0.074	11.427	NA	NA	0.144578	12.4976	0.01417	5.06108	0.22849	NA	NA	NA	NA	NA	90.7046	4.55848	4.69386	137.113	16.0306	16.142	NA	NA	NA	6.31318e-07	NA
UK012	UK012_179	NA	580	2920	128.3	1.82764	NA	NA	51.4403	4.23733	0.162	11.9521	NA	NA	0.434223	12.681	0.01944	4.23733	0.67559	NA	NA	NA	NA	NA	124.116	5.20889	5.42823	366.171	39.0024	39.2659	NA	NA	NA	2.21824e-30	NA
UK012	UK012_193	NA	12990	116800	630	5.83333	NA	NA	6.2383	3.86505	0.1084	5.2424	NA	NA	2.39587	6.51317	0.1603	3.86505	0.62915	NA	NA	1772.7	95.8253	96.9273	958.444	34.4224	36.1575	1241.37	46.6918	47.8772	NA	NA	NA	7.70767e-40	45.9331
UK012	UK012_194	NA	150	2340	126.6	1.43213	NA	NA	63.2911	4.89088	0.064	11.9451	NA	NA	0.139424	12.9076	0.0158	4.89088	-0.13605	NA	NA	NA	NA	NA	101.057	4.90404	5.05984	132.531	16.0385	16.143	NA	NA	NA	0.0350581	NA
UK012	UK012_210	NA	609	6620	284.1	3.60991	NA	NA	51.4139	3.95706	0.0881	9.22377	NA	NA	0.236264	10.0367	0.01945	3.95706	0.23202	NA	NA	NA	NA	NA	124.179	4.86681	5.10112	215.356	19.4788	19.6883	NA	NA	NA	3.38699e-18	NA
UK012	UK012_223	NA	1740	17910	534.2	3.12215	NA	NA	34.638	3.98828	0.097	7.88729	NA	NA	0.386118	8.83832	0.02887	3.98828	0.11429	NA	NA	NA	NA	NA	183.472	7.21424	7.55627	331.53	25.0038	25.3502	NA	NA	NA	4.14414e-26	NA
UK012	UK012_230	NA	18520	171900	942	7.76587	NA	NA	6.25391	3.95781	0.1082	4.97382	NA	NA	2.38549	6.35634	0.1599	3.95781	0.57295	NA	NA	1769.33	90.9418	92.1026	956.221	35.1726	36.8654	1238.26	45.5076	46.7197	NA	NA	NA	7.49984e-38	45.9557
UK012	UK012_231	NA	4060	54000	376	2.84848	NA	NA	7.97448	4.3488	0.0731	6.19919	NA	NA	1.26391	7.57244	0.1254	4.3488	0.63778	NA	NA	1016.73	125.839	126.877	761.57	31.2379	32.488	829.663	42.9519	43.761	NA	NA	NA	0.00696293	25.0959
UK012	UK012_235	NA	1610	23000	452.9	1.29548	NA	NA	22.2717	4.00421	0.0688	8.13635	NA	NA	0.425928	9.06829	0.0449	4.00421	-0.21018	NA	NA	NA	NA	NA	283.134	11.0919	11.6137	360.281	27.5106	27.8727	NA	NA	NA	0.000214547	NA
UK012	UK012_240	NA	550	9250	344.2	2.04516	NA	NA	43.592	4.21651	0.0596	9.67485	NA	NA	0.188513	10.5538	0.02294	4.21651	-0.00036348	NA	NA	NA	NA	NA	146.21	6.09558	6.35475	175.36	16.9986	17.1641	NA	NA	NA	0.14127	NA
UK012	UK012_243	NA	870	15210	565	1.20469	NA	NA	42.0168	4.05204	0.0567	8.76551	NA	NA	0.186064	9.65676	0.0238	4.05204	0.29395	NA	NA	NA	NA	NA	151.627	6.07231	6.3514	173.265	15.3833	15.5619	NA	NA	NA	0.374769	NA
UK012	UK012_245	NA	622	7980	306	1.47826	NA	NA	44.2087	4.1211	0.0766	9.44887	NA	NA	0.238904	10.3085	0.02262	4.1211	-0.24258	NA	NA	NA	NA	NA	144.193	5.87638	6.13769	217.522	20.1868	20.3926	NA	NA	NA	1.72837e-08	NA
UK012	UK012_249	NA	711	12370	447	0.963362	NA	NA	41.841	4.27849	0.0555	8.37411	NA	NA	0.182891	9.40379	0.0239	4.27849	0.46043	NA	NA	NA	NA	NA	152.257	6.43798	6.70399	170.545	14.7642	14.945	NA	NA	NA	0.570678	NA
UK012	UK012_252	NA	72	997	22.14	0.660896	NA	NA	26.5957	6.06401	0.082	17.1801	NA	NA	0.425112	18.2189	0.0376	6.06401	0.38018	NA	NA	NA	NA	NA	237.939	14.1657	14.46	359.7	55.2375	55.4188	NA	NA	NA	0.000916554	NA
UK012	UK012_256	NA	201	1930	92.8	2.16317	NA	NA	55.2486	4.81071	0.097	17.2746	NA	NA	0.242076	17.932	0.0181	4.81071	0.36066	NA	NA	NA	NA	NA	115.637	5.51335	5.6943	220.119	35.5008	35.6209	NA	NA	NA	5.27324e-07	NA
UK012	UK012_260	NA	479	6680	381	1.01872	NA	NA	66.9344	4.09088	0.0699	10.5054	NA	NA	0.143989	11.2738	0.01494	4.09088	-0.090714	NA	NA	NA	NA	NA	95.5971	3.8819	4.05703	136.591	14.409	14.532	NA	NA	NA	1.26694e-05	NA
UK012	UK012_262	NA	799	12420	200.6	1.21576	NA	NA	18.9394	4.06541	0.0651	8.9	NA	NA	0.473932	9.78456	0.0528	4.06541	0.1405	NA	NA	NA	NA	NA	331.689	13.1435	13.7437	393.901	31.9561	32.3177	NA	NA	NA	0.021393	NA
UK012	UK012_263	NA	4930	53920	218.8	2.99316	NA	NA	4.75285	4.00491	0.0914	6.03744	NA	NA	2.65151	7.245	0.2104	4.00491	0.45928	NA	NA	1454.95	115.056	116.056	1230.95	44.8782	46.9887	1315.06	53.4675	54.5676	NA	NA	NA	0.13801	15.3958
UK012	UK012_273	NA	1720	16860	78	2	NA	NA	5.38793	4.47934	0.1027	7.94995	NA	NA	2.62815	9.12503	0.1856	4.47934	0.40214	NA	NA	1673.48	147.401	148.143	1097.5	45.2042	46.9113	1308.55	67.2144	68.0904	NA	NA	NA	9.33699e-08	34.4185
UK012	UK012_276	NA	25010	145500	284	1.50743	NA	NA	2.28833	4.01869	0.1755	4.85995	NA	NA	10.5745	6.30627	0.437	4.01869	0.33008	NA	NA	2610.8	81.0079	82.0902	2337.2	78.786	82.4666	2486.47	58.5654	60.1514	NA	NA	NA	0.0238969	10.4796
UK012	UK012_277	NA	12100	114800	763	2.6041	NA	NA	7.88022	4.08337	0.104	7.68602	NA	NA	1.81969	8.70338	0.1269	4.08337	0.73275	NA	NA	1696.7	142.057	142.822	770.156	29.6426	30.9847	1052.57	57.0914	57.9081	NA	NA	NA	1.52235e-27	54.6085
UK012	UK012_282	NA	445	2490	114.6	1.08113	NA	NA	54.0541	4.76965	0.176	11.3664	NA	NA	0.448937	12.3266	0.0185	4.76965	0.67395	NA	NA	NA	NA	NA	118.169	5.5849	5.77131	376.535	38.799	39.0763	NA	NA	NA	9.43409e-35	NA
UK012	UK012_290	NA	10880	156700	1081	4.22596	NA	NA	8.16327	3.8312	0.0696	5.44213	NA	NA	1.17556	6.65544	0.1225	3.8312	0.60184	NA	NA	916.575	112.134	113.332	744.937	26.9529	28.3351	789.245	36.5316	37.4197	NA	NA	NA	0.320434	18.7261
UK012	UK012_294	NA	14110	142000	488	4.77963	NA	NA	4.0833	3.82678	0.0966	5.15448	NA	NA	3.26187	6.41973	0.2449	3.82678	0.79713	NA	NA	1559.47	96.8183	97.9697	1412.12	48.5304	51.0248	1472.01	49.9301	51.2347	NA	NA	NA	0.0158014	9.44861
UK012	UK012_296	NA	3470	52100	599	8.30791	NA	NA	13.3333	3.88324	0.0641	6.46408	NA	NA	0.662858	7.54081	0.075	3.88324	0.030427	NA	NA	NA	NA	NA	466.209	17.4649	18.3372	516.361	30.5312	31.1108	NA	NA	NA	0.437788	NA
UK012	UK012_298	NA	6200	109300	4000	2.1164	NA	NA	42.3729	3.99415	0.0553	6.26302	NA	NA	0.179944	7.42823	0.0236	3.99415	0.033834	NA	NA	NA	NA	NA	150.368	5.93642	6.21705	168.013	11.503	11.7278	NA	NA	NA	0.596783	NA
UK012	UK012_302	NA	916	18800	180	1.41732	NA	NA	10.9769	3.99681	0.0467	7.51685	NA	NA	0.586593	8.51338	0.0911	3.99681	0.35596	NA	NA	33.9129	180.707	181.725	562.039	21.5123	22.528	468.689	31.9703	32.4474	NA	NA	NA	1.2214e-07	-1557.3
UK012	UK012_305	NA	740	5460	277.8	1.20104	NA	NA	59.7372	4.70482	0.132	12.2684	NA	NA	0.304671	13.1396	0.01674	4.70482	-0.13541	NA	NA	NA	NA	NA	107.02	4.99352	5.16474	270.042	31.1657	31.3618	NA	NA	NA	5.00248e-19	NA
UK012	UK012_307	NA	11390	70700	271.6	21.1526	NA	NA	4.3956	3.95235	0.1534	5.20667	NA	NA	4.81181	6.53685	0.2275	3.95235	0.84674	NA	NA	2384.18	88.7869	89.8217	1321.38	47.2216	49.5004	1786.96	55.0073	56.3945	NA	NA	NA	2.5014e-96	44.577
UK012	UK012_308	NA	2580	38400	445	1.53026	NA	NA	13.2626	3.94049	0.0671	8.56616	NA	NA	0.697582	9.42902	0.0754	3.94049	0.61407	NA	NA	NA	NA	NA	468.607	17.8103	18.6748	537.346	39.3621	39.8418	NA	NA	NA	0.00319743	NA
UK012	UK012_312	NA	641	10280	361.6	1.67407	NA	NA	39.6354	4.12853	0.0581	8.66956	NA	NA	0.202113	9.6024	0.02523	4.12853	0.14545	NA	NA	NA	NA	NA	160.625	6.54953	6.83974	186.913	16.3944	16.587	NA	NA	NA	0.189155	NA
UK012	UK012_321	NA	18660	147800	688	1.01926	NA	NA	5.20833	3.86959	0.12	5.13224	NA	NA	3.17676	6.42756	0.192	3.86959	0.8411	NA	NA	1956.22	91.7494	92.8498	1132.2	40.1803	42.2011	1451.53	49.6784	50.9732	NA	NA	NA	4.79682e-70	42.123
UK012	UK012_323	NA	378	8890	515	1.21462	NA	NA	65.4022	4.29492	0.0411	9.43721	NA	NA	0.0866464	10.3686	0.01529	4.29492	0.025196	NA	NA	NA	NA	NA	97.8197	4.16956	4.34056	84.3745	8.395	8.47962	NA	NA	NA	0.360864	NA
UK012	UK012_326	NA	3900	70000	849	2.08037	NA	NA	13.4409	3.85071	0.0524	6.26623	NA	NA	0.537533	7.35484	0.0744	3.85071	0.66043	NA	NA	NA	NA	NA	462.61	17.1897	18.0625	436.797	26.1144	26.6352	NA	NA	NA	0.76624	NA
UK012	UK012_328	NA	394	517	6.6	1.31474	NA	NA	14.3472	6.30744	0.73	11.9396	NA	NA	7.01547	13.5032	0.0697	6.30744	0.26894	NA	NA	NA	NA	NA	434.348	26.4938	27.003	2113.39	120.567	121.292	NA	NA	NA	1.74111e-41	NA
UK012	UK012_329	NA	539	7130	434	1.75709	NA	NA	65.2316	4.2449	0.07	10.9573	NA	NA	0.147959	11.7508	0.01533	4.2449	0.49432	NA	NA	NA	NA	NA	98.0737	4.13162	4.305	140.108	15.3797	15.5005	NA	NA	NA	2.78871e-07	NA
UK012	UK012_332	NA	4780	63700	486	3.788	NA	NA	7.98085	3.81847	0.0743	6.13879	NA	NA	1.28363	7.22948	0.1253	3.81847	0.30384	NA	NA	1049.63	123.988	125.031	760.997	27.409	28.8237	838.471	41.2849	42.1373	NA	NA	NA	0.0315309	27.4984
UK012	UK012_335	NA	630	7560	504	1.85978	NA	NA	70.1262	4.40944	0.08	10.595	NA	NA	0.157294	11.476	0.01426	4.40944	0.47125	NA	NA	NA	NA	NA	91.2766	3.99642	4.15207	148.331	15.8388	15.9692	NA	NA	NA	1.59045e-12	NA
UK012	UK012_337	NA	125	1990	168.5	1.30823	NA	NA	87.7193	5.75379	0.063	17.0049	NA	NA	0.0990254	17.952	0.0114	5.75379	0.19921	NA	NA	NA	NA	NA	73.0734	4.18075	4.27713	95.8763	16.4255	16.4809	NA	NA	NA	0.513589	NA
UK012	UK012_357	NA	626	9630	641	0.969743	NA	NA	64.8088	4.15043	0.0686	8.30828	NA	NA	0.145946	9.28728	0.01543	4.15043	0.36192	NA	NA	NA	NA	NA	98.7086	4.06563	4.24392	138.326	12.0106	12.1613	NA	NA	NA	4.04716e-10	NA
UK012	UK012_362	NA	75	1180	88.2	1.01965	NA	NA	68.9655	6.09579	0.065	16.3867	NA	NA	0.129952	17.4838	0.0145	6.09579	0.27903	NA	NA	NA	NA	NA	92.8018	5.61648	5.73198	124.054	20.4196	20.4922	NA	NA	NA	0.169374	NA
UK012	UK012_366	NA	3920	53500	398	4.63869	NA	NA	6.99301	4.19878	0.074	6.3561	NA	NA	1.45905	7.61773	0.143	4.19878	0.81883	NA	NA	1041.47	128.555	129.564	861.604	33.8638	35.3156	913.615	45.9255	46.7806	NA	NA	NA	0.0166349	17.2702
UK012	UK012_371	NA	224	3490	337	0.982507	NA	NA	87.9507	4.26627	0.0633	11.6032	NA	NA	0.0992351	12.3626	0.01137	4.26627	0.027293	NA	NA	NA	NA	NA	72.8822	3.09184	3.22031	96.0701	11.3327	11.4132	NA	NA	NA	0.00828231	NA
UK012	UK012_373	NA	342	6330	534.1	1.09671	NA	NA	78.6164	4.49999	0.0552	8.81986	NA	NA	0.0968116	9.90151	0.01272	4.49999	0.43756	NA	NA	NA	NA	NA	81.4813	3.64357	3.77993	93.8289	8.87437	8.97241	NA	NA	NA	0.211101	NA
UK012	UK012_374	NA	138	1680	111.6	1.10277	NA	NA	58.8235	6.00026	0.086	20.1802	NA	NA	0.201581	21.0534	0.017	6.00026	0.28468	NA	NA	NA	NA	NA	108.668	6.46571	6.60289	186.463	35.878	35.9661	NA	NA	NA	0.0015313	NA
UK012	UK012_377	NA	1440	22800	388	0.791837	NA	NA	15.5039	4.27897	0.062	8.93301	NA	NA	0.551382	9.90496	0.0645	4.27897	0.49752	NA	NA	NA	NA	NA	402.934	16.7137	17.4041	445.902	35.7599	36.155	NA	NA	NA	0.674461	NA
UK012	UK012_378	NA	6700	61900	3410	0.598246	NA	NA	50.4032	4.31566	0.11	9.10754	NA	NA	0.300909	10.0783	0.01984	4.31566	0.33361	NA	NA	NA	NA	NA	126.645	5.41221	5.63208	267.11	23.6747	23.9273	NA	NA	NA	2.60534e-29	NA
UK012	UK012_392	NA	254	4330	418	0.703704	NA	NA	90.2527	4.91637	0.061	13.5805	NA	NA	0.0931903	14.443	0.01108	4.91637	-0.37566	NA	NA	NA	NA	NA	71.0335	3.4731	3.58231	90.471	12.5021	12.5672	NA	NA	NA	0.646934	NA
UK012	UK012_396	NA	691	11190	583	1.33716	NA	NA	48.5909	4.00784	0.0599	7.90201	NA	NA	0.16997	8.86028	0.02058	4.00784	0.51603	NA	NA	NA	NA	NA	131.321	5.20987	5.45452	159.393	13.0707	13.2508	NA	NA	NA	0.000100039	NA
UK012	UK012_402	NA	1054	18630	1005	0.895722	NA	NA	50.1002	4.05302	0.0557	8.13139	NA	NA	0.153291	9.08551	0.01996	4.05302	0.34223	NA	NA	NA	NA	NA	127.403	5.11298	5.34787	144.814	12.2625	12.4232	NA	NA	NA	0.280123	NA
UK012	UK012_404	NA	178	2800	214.6	1.32633	NA	NA	73.9645	5.07229	0.064	15.2947	NA	NA	0.119305	16.1139	0.01352	5.07229	-0.24339	NA	NA	NA	NA	NA	86.5716	4.36181	4.49078	114.442	17.4414	17.5144	NA	NA	NA	0.367471	NA
UK012	UK012_408	NA	69	870	63.2	1.70996	NA	NA	67.5676	7.41512	0.091	23.1207	NA	NA	0.185697	24.2807	0.0148	7.41512	-0.33282	NA	NA	NA	NA	NA	94.7078	6.97137	7.06857	172.951	38.6305	38.7019	NA	NA	NA	0.025836	NA
UK012	UK012_410	NA	944	11880	628	1.58186	NA	NA	50.3525	3.95644	0.0781	8.23553	NA	NA	0.213861	9.13659	0.01986	3.95644	-0.1081	NA	NA	NA	NA	NA	126.771	4.96662	5.20581	196.788	16.3461	16.558	NA	NA	NA	9.51437e-13	NA
UK012	UK012_427	NA	310	2860	153.2	1.81517	NA	NA	55.2486	5.17602	0.104	11.2537	NA	NA	0.259545	12.3869	0.0181	5.17602	0.065253	NA	NA	NA	NA	NA	115.637	5.93202	6.10056	234.3	25.9232	26.1066	NA	NA	NA	9.63558e-16	NA
UK012	UK012_428	NA	5350	72200	620	2.81946	NA	NA	8.95255	3.93839	0.0715	5.87041	NA	NA	1.10119	7.06913	0.1117	3.93839	0.63056	NA	NA	971.742	119.962	121.065	682.613	25.5097	26.7492	753.924	37.6349	38.4471	NA	NA	NA	0.000239056	29.7537
UK012	UK012_435	NA	940	5950	422.8	0.91913	NA	NA	76.3359	5.09527	0.16	10.1038	NA	NA	0.288996	11.3158	0.0131	5.09527	0.69396	NA	NA	NA	NA	NA	83.8997	4.24722	4.37169	257.769	25.7662	25.9845	NA	NA	NA	2.40168e-40	NA
UK012	UK012_438	NA	21620	314700	2921	7.35768	NA	NA	10.2041	3.9138	0.0665	4.95168	NA	NA	0.898564	6.31165	0.098	3.9138	0.22349	NA	NA	822.153	103.529	104.863	602.677	22.5187	23.6263	650.96	30.3407	31.1596	NA	NA	NA	0.435182	26.6952
UK012	UK012_444	NA	182	3080	240.8	0.664459	NA	NA	87.6424	4.91311	0.0584	11.5925	NA	NA	0.0918755	12.5907	0.01141	4.91311	0.18352	NA	NA	NA	NA	NA	73.1371	3.573	3.6855	89.249	10.7578	10.8314	NA	NA	NA	0.277609	NA
UK012	UK012_447	NA	238	5580	363	2.85827	NA	NA	73.0994	4.17218	0.0408	11.7355	NA	NA	0.0769569	12.4551	0.01368	4.17218	0.16134	NA	NA	NA	NA	NA	87.5892	3.62966	3.78722	75.2799	9.0373	9.10052	NA	NA	NA	0.703176	NA
UK012	UK012_448	NA	1960	36300	1373	2.01615	NA	NA	42.4809	3.85438	0.0549	7.08699	NA	NA	0.178189	8.06733	0.02354	3.85438	0.3688	NA	NA	NA	NA	NA	149.99	5.71445	6.00407	166.501	12.3893	12.5949	NA	NA	NA	0.461809	NA
UK012	UK012_458	NA	397	5270	269.9	1.09493	NA	NA	56.8182	4.6888	0.074	10.4371	NA	NA	0.179575	11.4419	0.0176	4.6888	0.7623	NA	NA	NA	NA	NA	112.47	5.22775	5.40821	167.695	17.6886	17.8351	NA	NA	NA	5.39342e-12	NA
UK012	UK012_460	NA	292	5320	384	1.5	NA	NA	82.0345	4.51527	0.062	12.1309	NA	NA	0.104207	12.944	0.01219	4.51527	0.0025746	NA	NA	NA	NA	NA	78.1067	3.50545	3.63576	100.652	12.4041	12.4845	NA	NA	NA	0.0525365	NA
UK012	UK012_462	NA	5410	77700	611	18.476	NA	NA	8.8574	3.88221	0.07	6.12736	NA	NA	1.08967	7.25369	0.1129	3.88221	0.31494	NA	NA	928.353	126.077	127.142	689.568	25.3885	26.6573	748.341	38.4249	39.2129	NA	NA	NA	0.291609	25.7214
UK012	UK012_467	NA	3790	47600	270	3.72414	NA	NA	6.45995	3.87432	0.0798	6.67287	NA	NA	1.70324	7.71606	0.1548	3.87432	0.35197	NA	NA	1192.05	132.009	132.95	927.814	33.4797	35.1595	1009.75	49.4036	50.3006	NA	NA	NA	0.108933	22.1665
UK012	UK012_468	NA	10430	12210	1	2.33645	NA	NA	0.0994036	5.9738	0.861	5.66229	NA	NA	1194.27	8.2309	10.06	5.9738	0.94988	NA	NA	5026.15	80.3688	81.1615	15492.9	350.623	358.142	7195.13	83.6943	85.0352	NA	NA	NA	0	-208.246
UK012	UK012_469	NA	11160	91400	269	2.33913	NA	NA	3.38983	4.42203	0.1221	5.34089	NA	NA	4.96637	6.93394	0.295	4.42203	0.87746	NA	NA	1987.14	95.1442	96.1986	1666.47	64.9392	67.4545	1813.61	58.6708	59.988	NA	NA	NA	2.57926e-19	16.1373
UK012	UK012_476	NA	349	2680	148.8	1.17908	NA	NA	62.8931	5.08566	0.127	11.2868	NA	NA	0.278421	12.3797	0.0159	5.08566	-0.046876	NA	NA	NA	NA	NA	101.692	5.13112	5.28206	249.404	27.3825	27.5765	NA	NA	NA	7.52425e-21	NA
UK012	UK012_477	NA	376	6490	504	1.575	NA	NA	89.3655	4.32676	0.061	12.0558	NA	NA	0.0941155	12.8087	0.01119	4.32676	0.10013	NA	NA	NA	NA	NA	71.7348	3.08659	3.21135	91.3299	11.1879	11.262	NA	NA	NA	0.0588542	NA
UK012	UK012_478	NA	469	6070	311	1.13919	NA	NA	60.241	4.28649	0.077	12.4597	NA	NA	0.176238	13.1764	0.0166	4.28649	0.42388	NA	NA	NA	NA	NA	106.132	4.5121	4.69785	164.818	20.0487	20.1741	NA	NA	NA	9.56656e-08	NA
UK012	UK012_489	NA	2260	30800	348	2.38356	NA	NA	13.1234	4.02677	0.0718	7.23264	NA	NA	0.754364	8.27804	0.0762	4.02677	0.57966	NA	NA	NA	NA	NA	473.401	18.3797	19.2349	570.753	36.1578	36.7284	NA	NA	NA	4.44139e-08	NA
UK012	UK012_490	NA	2070	37700	411	2.88421	NA	NA	12.5313	3.9798	0.0516	6.85693	NA	NA	0.567746	7.9282	0.0798	3.9798	0.28334	NA	NA	NA	NA	NA	494.929	18.9601	19.8628	456.556	29.161	29.6622	NA	NA	NA	0.954315	NA
UK012	UK012_498	NA	1240	14920	183.7	1.64164	NA	NA	14.2045	4.04697	0.076	12.0035	NA	NA	0.737713	12.6674	0.0704	4.04697	0.37585	NA	NA	NA	NA	NA	438.565	17.1584	17.9489	561.07	54.657	55.0274	NA	NA	NA	0.00057292	NA
UK012	UK012_502	NA	368	5280	310.3	1.48469	NA	NA	65.9196	4.54963	0.064	11.2038	NA	NA	0.133865	12.0924	0.01517	4.54963	-0.18544	NA	NA	NA	NA	NA	97.0578	4.38269	4.54321	127.565	14.4969	14.6045	NA	NA	NA	0.01491	NA
UK012	UK012_508	NA	289	6500	254	2.29035	NA	NA	42.1941	4.63014	0.0423	10.6117	NA	NA	0.138226	11.5778	0.0237	4.63014	0.14402	NA	NA	NA	NA	NA	150.998	6.91016	7.15467	131.463	14.2773	14.3928	NA	NA	NA	0.845078	NA
UK012	UK012_513	NA	256	2750	137.1	1.48537	NA	NA	53.7634	4.93057	0.095	12.2853	NA	NA	0.243634	13.2377	0.0186	4.93057	0.67867	NA	NA	NA	NA	NA	118.802	5.80397	5.98544	221.392	26.3382	26.5015	NA	NA	NA	3.06475e-15	NA
UK012	UK012_517	NA	1600	34500	1370	1.29245	NA	NA	41.7362	3.94465	0.043	7.38949	NA	NA	0.142055	8.37644	0.02396	3.94465	-0.27337	NA	NA	NA	NA	NA	152.635	5.95019	6.23842	134.873	10.5797	10.7427	NA	NA	NA	0.813551	NA
UK012	UK012_522	NA	7900	118600	1350	5.07519	NA	NA	11.5473	4.00268	0.0644	5.6713	NA	NA	0.768962	6.94155	0.0866	4.00268	0.35631	NA	NA	754.795	119.918	121.099	535.398	20.5645	21.5327	579.167	30.6482	31.3336	NA	NA	NA	0.42455	29.0671
UK012	UK012_524	NA	821	12790	554	1.63808	NA	NA	44.7227	3.99036	0.0631	9.36152	NA	NA	0.194537	10.1765	0.02236	3.99036	0.077688	NA	NA	NA	NA	NA	142.554	5.62599	5.89245	180.493	16.8295	17.0056	NA	NA	NA	0.00162316	NA
UK012	UK012_527	NA	49280	157400	236.4	2.23652	NA	NA	1.53846	3.88606	0.3062	4.29901	NA	NA	27.4423	5.79508	0.65	3.88606	0.53118	NA	NA	3501.87	66.4879	67.6204	3228.2	98.694	103.617	3399.38	56.8327	58.6506	NA	NA	NA	0.00349955	7.81491
UK012	UK012_535	NA	4180	55670	398	1.64124	NA	NA	6.97837	3.81939	0.0767	6.32796	NA	NA	1.51545	7.39127	0.1433	3.81939	0.21864	NA	NA	1113.4	126.611	127.614	863.296	30.8604	32.4526	936.644	45.2442	46.1385	NA	NA	NA	0.322862	22.4631
UK012	UK012_537	NA	88600	392800	1140	5.11211	NA	NA	2.8169	4.04191	0.2313	4.14445	NA	NA	11.3215	5.78908	0.355	4.04191	0.59112	NA	NA	3061.06	66.327	67.5418	1958.43	68.2669	71.4203	2549.98	54.0618	55.7943	NA	NA	NA	1.6665e-88	36.0213
UK012	UK012_540	NA	4010	56100	635	5.85253	NA	NA	11.0132	3.92531	0.0745	6.41104	NA	NA	0.932703	7.51728	0.0908	3.92531	-0.20488	NA	NA	1055.04	129.405	130.404	560.267	21.0637	22.0939	669.056	36.8519	37.556	NA	NA	NA	0.000424521	46.8963
UK012	UK012_543	NA	3600	38900	177.5	2.26115	NA	NA	4.34216	4.02262	0.0994	6.23552	NA	NA	3.15632	7.42046	0.2303	4.02262	0.13383	NA	NA	1612.88	116.38	117.328	1336.07	48.5421	50.8053	1446.55	57.2787	58.403	NA	NA	NA	0.192674	17.1624
UK012	UK012_547	NA	2890	48300	646	2.95247	NA	NA	12.6103	3.90247	0.0636	6.42428	NA	NA	0.695395	7.51669	0.0793	3.90247	0.20763	NA	NA	NA	NA	NA	491.943	18.4837	19.3981	536.037	31.3152	31.9134	NA	NA	NA	0.816953	NA
UK012	UK012_548	NA	18530	215200	1062	0.667925	NA	NA	4.62107	4.20692	0.0899	4.98145	NA	NA	2.68237	6.5202	0.2164	4.20692	0.79998	NA	NA	1423.41	95.2843	96.4969	1262.82	48.2471	50.3077	1323.61	48.2624	49.4851	NA	NA	NA	0.00770697	11.2815
UK012	UK012_552	NA	5250	67500	409	2.40872	NA	NA	5.54631	3.82566	0.082	6.00462	NA	NA	2.0385	7.11977	0.1803	3.82566	0.57785	NA	NA	1245.52	117.822	118.857	1068.61	37.6733	39.6107	1128.46	48.5376	49.571	NA	NA	NA	0.393676	14.2032
UK012	UK012_555	NA	202	3440	249.8	3.21907	NA	NA	63.6943	5.33788	0.06	11.1604	NA	NA	0.129883	12.3713	0.0157	5.33788	0.41898	NA	NA	NA	NA	NA	100.422	5.31889	5.4611	123.993	14.4408	14.5432	NA	NA	NA	0.0390458	NA
UK012	UK012_556	NA	134	2390	166.1	0.661753	NA	NA	62.1504	4.46643	0.06	13.5629	NA	NA	0.133109	14.2794	0.01609	4.46643	0.24913	NA	NA	NA	NA	NA	102.897	4.55934	4.7325	126.888	17.034	17.1247	NA	NA	NA	0.404731	NA
UK012	UK012_557	NA	4980	81500	1123	4.20442	NA	NA	12.4688	4.0698	0.0651	6.10894	NA	NA	0.719874	7.34046	0.0802	4.0698	0.40535	NA	NA	NA	NA	NA	497.316	19.4788	20.3665	550.593	31.2069	31.8317	NA	NA	NA	0.0364435	NA
UK012	UK012_559	NA	439	1880	126.8	0.173937	NA	NA	60.6061	5.20736	0.241	12.0337	NA	NA	0.54828	13.1121	0.0165	5.20736	0.11712	NA	NA	NA	NA	NA	105.498	5.44894	5.60193	443.869	47.1809	47.4792	NA	NA	NA	1.09855e-32	NA
UK012	UK012_560	NA	1130	19600	883	2.1432	NA	NA	40.1929	4.0567	0.0605	8.48111	NA	NA	0.207542	9.40138	0.02488	4.0567	0.35901	NA	NA	NA	NA	NA	158.424	6.34846	6.63959	191.488	16.4083	16.6093	NA	NA	NA	0.00215414	NA
UK012	UK012_561	NA	482	8970	615	2.0297	NA	NA	57.9374	4.55154	0.0581	11.1407	NA	NA	0.138267	12.0346	0.01726	4.55154	0.29337	NA	NA	NA	NA	NA	110.316	4.97835	5.16054	131.499	14.8445	14.9557	NA	NA	NA	0.315044	NA
UK012	UK012_565	NA	2170	38100	1004	1.7614	NA	NA	23.31	4.07408	0.0589	6.83396	NA	NA	0.348397	7.9562	0.0429	4.07408	0.41611	NA	NA	NA	NA	NA	270.784	10.8035	11.2948	303.514	20.8763	21.2325	NA	NA	NA	0.0727379	NA
UK012	UK012_567	NA	689	12600	982	1.38897	NA	NA	71.1744	4.19816	0.0563	8.72741	NA	NA	0.109065	9.68464	0.01405	4.19816	0.045363	NA	NA	NA	NA	NA	89.9417	3.74968	3.91047	105.11	9.67065	9.78229	NA	NA	NA	0.314217	NA
UK012	UK012_568	NA	22580	320100	2700	2.99335	NA	NA	7.4129	4.04475	0.0718	4.91375	NA	NA	1.33548	6.36435	0.1349	4.04475	0.63461	NA	NA	980.277	100.224	101.535	815.759	30.9933	32.4228	861.266	36.9689	37.9507	NA	NA	NA	0.23406	16.7828
UK012	UK012_572	NA	1070	18500	612	2.3173	NA	NA	29.3255	4.25951	0.0574	8.23632	NA	NA	0.269878	9.27256	0.0341	4.25951	0.28947	NA	NA	NA	NA	NA	216.158	9.05461	9.43202	242.596	20.012	20.264	NA	NA	NA	0.711246	NA
UK012	UK012_573	NA	10180	79700	263.8	1.70524	NA	NA	2.88517	3.86067	0.1259	5.42152	NA	NA	6.01666	6.65565	0.3466	3.86067	0.71588	NA	NA	2041.49	95.9793	97.0118	1918.34	64.0597	67.2962	1978.26	58.0119	59.4242	NA	NA	NA	0.981719	6.0322
UK012	UK012_579	NA	12350	65900	201.1	2.29043	NA	NA	2.65252	3.9621	0.1785	5.36559	NA	NA	9.27857	6.66992	0.377	3.9621	0.55611	NA	NA	2638.98	89.2146	90.1941	2062.25	69.9308	73.2894	2365.9	61.2103	62.6944	NA	NA	NA	1.21277e-19	21.8542
UK012	UK012_581	NA	6710	90100	817	3.71364	NA	NA	7.65111	3.88447	0.0705	5.8001	NA	NA	1.27047	6.98071	0.1307	3.88447	0.64161	NA	NA	942.951	119.048	120.168	791.858	28.9455	30.3904	832.603	39.6826	40.5606	NA	NA	NA	0.885708	16.0235
UK012	UK012_586	NA	492	6950	697	1.39679	NA	NA	87.108	4.11938	0.0647	9.80723	NA	NA	0.102411	10.6372	0.01148	4.11938	0.44631	NA	NA	NA	NA	NA	73.5833	3.01394	3.14807	98.9996	10.0341	10.1302	NA	NA	NA	3.57767e-06	NA
UK012	UK012_594	NA	16780	292000	5000	9.29368	NA	NA	14.3678	4.58075	0.05288	4.95308	NA	NA	0.50746	6.74657	0.0696	4.58075	0.94576	NA	NA	NA	NA	NA	433.745	19.2152	19.9096	416.74	23.0645	23.6101	NA	NA	NA	0.00110066	NA
UK012	UK012_595	NA	1208	22840	418	2.94574	NA	NA	15.4321	4.23733	0.0472	7.81689	NA	NA	0.421714	8.89149	0.0648	4.23733	0.49415	NA	NA	NA	NA	NA	404.751	16.6233	17.3234	357.276	26.7862	27.1529	NA	NA	NA	0.00394738	NA
UK012	UK012_602	NA	206	3430	298	1.30759	NA	NA	77.8816	4.17446	0.059	14.009	NA	NA	0.104452	14.6177	0.01284	4.17446	0.14426	NA	NA	NA	NA	NA	82.2451	3.41148	3.5594	100.878	14.0381	14.1094	NA	NA	NA	0.81361	NA
UK012	UK012_616	NA	283	4910	395.6	1.02753	NA	NA	71.3776	4.85266	0.059	10.3164	NA	NA	0.11397	11.4007	0.01401	4.85266	0.17871	NA	NA	NA	NA	NA	89.6875	4.32209	4.46154	109.591	11.844	11.9429	NA	NA	NA	0.0874889	NA
UK012	UK012_618	NA	278	2480	163.2	2.40708	NA	NA	57.8035	5.50027	0.114	12.4163	NA	NA	0.271927	13.5801	0.0173	5.50027	0.66	NA	NA	NA	NA	NA	110.569	6.02975	6.1817	244.233	29.4879	29.6616	NA	NA	NA	1.73107e-19	NA
UK012	UK012_635	NA	171	2770	219.7	1.89888	NA	NA	76.1615	4.47757	0.0621	11.6179	NA	NA	0.112424	12.4509	0.01313	4.47757	0.15362	NA	NA	NA	NA	NA	84.0906	3.74077	3.88214	108.18	12.7773	12.8668	NA	NA	NA	0.0185615	NA
UK012	UK012_637	NA	202	1470	127.4	1.5925	NA	NA	78.7402	6.32745	0.138	15.0631	NA	NA	0.241648	16.3381	0.0127	6.32745	0.21116	NA	NA	NA	NA	NA	81.3539	5.11528	5.21299	219.769	32.2972	32.4287	NA	NA	NA	2.89425e-14	NA
University of Calgary, Centre for Pure and Applied Tectonics and Thermochronology
15-PIC-01 HT		f206c	207Pb CPS	206Pb CPS	U (ppm)1	U/Th	206Pb/204Pb	1σ %	Data for Tera-Wasserburg plot2				208Pb/206Pb	2σx (%)	Data for Wetherill plot2					208Pb/232Th	2σx (%)	Dates									208Pb/232Th	2σx (ABS)	2σtotal (ABS)	Prob. Conc. (%)	% conc3	Comments	Accepted Dates4
Sample	Spot								238U/206Pb	2σx (%)	207Pb/206Pb	2σx (%)			207Pb/235Pb	2σx (%)	206Pb/238U	2σx (%)	Rho			207Pb/206Pb	2σx (ABS)	2σtotal (ABS)	206Pb/238U	2σx (ABS)	2σtotal (ABS)	207Pb/235Pb	2σx (ABS)	2σtotal (ABS)							Date (Ma)	2σx (ABS)	2σx (%)	2σtotal (ABS)	2σtotal (%)
UK013	UK013_459	NA	57	1019	138	1.57714	NA	NA	95.9693	5.6097	0.053	18.2333	NA	NA	0.0761456	19.0767	0.01042	5.6097	0.3183	NA	NA	NA	NA	NA	66.8241	3.72927	3.81966	74.5147	13.7067	13.7477	NA	NA	NA	23.8875	NA		66.8241	3.72927	5.58073	3.81966	5.72557
UK013	UK013_465	NA	64	1290	170.9	1.9803	NA	NA	91.7431	6.25869	0.052	20.8519	NA	NA	0.0781504	21.7709	0.0109	6.25869	0.03322	NA	NA	NA	NA	NA	69.8857	4.35031	4.43522	76.4045	16.0248	16.0616	NA	NA	NA	42.972	NA		69.8857	4.35031	6.22489	4.43522	6.31065
UK013	UK013_474	NA	77	1340	172.3	1.35991	NA	NA	90.9091	5.82168	0.057	16.4306	NA	NA	0.0864508	17.4315	0.011	5.82168	0.46361	NA	NA	NA	NA	NA	70.5234	4.08327	4.17524	84.1917	14.0848	14.1352	NA	NA	NA	3.28854	NA		70.5234	4.08327	5.78995	4.17524	5.99319
UK013	UK013_221	NA	102	1910	229.4	1.94902	NA	NA	90.7441	4.87914	0.052	20.5677	NA	NA	0.0790108	21.1385	0.01102	4.87914	0.073221	NA	NA	NA	NA	NA	70.6509	3.42834	3.53777	77.2145	15.7181	15.7564	NA	NA	NA	40.8657	NA		70.6509	3.42834	4.8525	3.53777	4.99313
UK013	UK013_97	NA	168	3810	354	1.58036	NA	NA	90.1713	3.69548	0.0468	12.0484	NA	NA	0.0715614	12.6024	0.01109	3.69548	0.38838	NA	NA	NA	NA	NA	71.0972	2.61295	2.7567	70.18	8.54585	8.60425	NA	NA	NA	81.6444	NA		71.0972	2.61295	3.67518	2.7567	3.8759
UK013	UK013_392	NA	56	1170	138.7	2.09201	NA	NA	89.2857	6.52217	0.051	22.1121	NA	NA	0.0787571	23.0539	0.0112	6.52217	0.3234	NA	NA	NA	NA	NA	71.7985	4.65684	4.7406	76.9757	17.0916	17.1265	NA	NA	NA	52.3683	NA		71.7985	4.65684	6.48598	4.7406	6.61019
UK013	UK013_432	NA	61	1479	181.3	1.56293	NA	NA	89.2061	4.13619	0.044	20.8068	NA	NA	0.0680079	21.2139	0.01121	4.13619	-0.21951	NA	NA	NA	NA	NA	71.8623	2.95585	3.08635	66.8073	13.7171	13.7503	NA	NA	NA	48.9274	NA		71.8623	2.95585	4.11322	3.08635	4.31989
UK013	UK013_495	NA	75	1780	207.8	1.22959	NA	NA	86.9565	4.82108	0.045	19.3616	NA	NA	0.0713529	19.9528	0.0115	4.82108	-0.074263	NA	NA	NA	NA	NA	73.7107	3.53342	3.64889	69.9825	13.4939	13.5308	NA	NA	NA	59.8933	NA		73.7107	3.53342	4.79363	3.64889	4.97034
UK013	UK013_401	NA	160	3530	427	0.690939	NA	NA	86.2069	3.98467	0.0427	12.064	NA	NA	0.0682947	12.7051	0.0116	3.98467	0.26974	NA	NA	NA	NA	NA	74.348	2.9455	3.0854	67.0799	8.2473	8.30276	NA	NA	NA	6.7395	NA		74.348	2.9455	3.96178	3.0854	4.16396
UK013	UK013_526	NA	278	6170	687	0.962185	NA	NA	86.0585	3.63879	0.0478	10.9573	NA	NA	0.0765835	11.5457	0.01162	3.63879	-0.16624	NA	NA	NA	NA	NA	74.4755	2.69441	2.84718	74.9278	8.33966	8.40752	NA	NA	NA	92.1517	NA		74.4755	2.69441	3.61785	2.84718	3.81995
UK013	UK013_448	NA	96	1710	203.6	1.91174	NA	NA	85.8369	4.4893	0.056	15.0413	NA	NA	0.0899529	15.6969	0.01165	4.4893	0.13359	NA	NA	NA	NA	NA	74.6666	3.33267	3.45797	87.4595	13.1546	13.2126	NA	NA	NA	5.27417	NA		74.6666	3.33267	4.4634	3.45797	4.60793
UK013	UK013_193	NA	127	2020	199.9	1.25016	NA	NA	85.1064	4.13376	0.062	17.8714	NA	NA	0.100446	18.3433	0.01175	4.13376	0.007164	NA	NA	NA	NA	NA	75.3038	3.09477	3.23156	97.1876	17.0024	17.0573	NA	NA	NA	1.2056	NA		75.3038	3.09477	4.10971	3.23156	4.25436
UK013	UK013_181	NA	155	2940	283.3	1.45881	NA	NA	84.6024	4.51644	0.045	15.1651	NA	NA	0.0733384	15.8233	0.01182	4.51644	0.019463	NA	NA	NA	NA	NA	75.7498	3.40117	3.52755	71.8625	10.9784	11.0261	NA	NA	NA	49.5663	NA		75.7498	3.40117	4.49001	3.52755	4.67686
UK013	UK013_615	NA	233	4980	524	1.14636	NA	NA	83.9631	3.61059	0.043	10.9475	NA	NA	0.0706125	11.5275	0.01191	3.61059	0.31488	NA	NA	NA	NA	NA	76.3232	2.73947	2.89716	69.2805	7.72012	7.78313	NA	NA	NA	5.39696	NA		76.3232	2.73947	3.5893	2.89716	3.80178
UK013	UK013_260	NA	84	1700	197.1	2.23723	NA	NA	82.6446	5.43787	0.047	17.7838	NA	NA	0.0784124	18.5966	0.0121	5.43787	0.27767	NA	NA	NA	NA	NA	77.5335	4.19092	4.29894	76.6512	13.7306	13.7738	NA	NA	NA	89.3573	NA		77.5335	4.19092	5.4053	4.29894	5.5452
UK013	UK013_391	NA	679	12910	1396	1.99429	NA	NA	82.5083	3.32693	0.0503	8.71559	NA	NA	0.0840566	9.32899	0.01212	3.32693	-0.17594	NA	NA	NA	NA	NA	77.6609	2.56822	2.7415	81.9517	7.345	7.43634	NA	NA	NA	29.5834	NA		77.6609	2.56822	3.30697	2.7415	3.50164
UK013	UK013_254	NA	586	10570	1147	8.78927	NA	NA	82.3723	4.0437	0.0547	9.72952	NA	NA	0.0915603	10.5364	0.01214	4.0437	0.15938	NA	NA	NA	NA	NA	77.7882	3.12662	3.2709	88.9558	8.97411	9.06172	NA	NA	NA	1.37289	NA		77.7882	3.12662	4.0194	3.2709	4.16679
UK013	UK013_507	NA	2660	56200	5970	0.541742	NA	NA	82.1018	3.32386	0.0497	6.81597	NA	NA	0.0834651	7.58324	0.01218	3.32386	0.44734	NA	NA	NA	NA	NA	78.043	2.5784	2.75268	81.3975	5.93171	6.043	NA	NA	NA	20.6803	NA		78.043	2.5784	3.30382	2.75268	3.52829
UK013	UK013_307	NA	473	10710	1004	0.741507	NA	NA	81.9001	3.95234	0.0423	10.522	NA	NA	0.0712127	11.2398	0.01221	3.95234	0.076107	NA	NA	NA	NA	NA	78.2341	3.07339	3.2217	69.8496	7.58716	7.65229	NA	NA	NA	3.47093	NA		78.2341	3.07339	3.92845	3.2217	4.1727
UK013	UK013_400	NA	692	13690	1497	1.21117	NA	NA	81.5661	3.39288	0.0493	10.25	NA	NA	0.0833372	10.797	0.01226	3.39288	0.13071	NA	NA	NA	NA	NA	78.5525	2.64902	2.82108	81.2776	8.43369	8.51211	NA	NA	NA	52.2036	NA		78.5525	2.64902	3.37229	2.82108	3.58433
UK013	UK013_163	NA	105	1990	165.4	1.82762	NA	NA	80.9061	3.66049	0.05	18.5713	NA	NA	0.0852098	18.9286	0.01236	3.66049	0.077108	NA	NA	NA	NA	NA	79.1893	2.88099	3.04245	83.0313	15.0923	15.1381	NA	NA	NA	61.2521	NA		79.1893	2.88099	3.6381	3.04245	3.83801
UK013	UK013_484	NA	286	6100	690	2.81633	NA	NA	80.7103	4.25627	0.0474	9.78593	NA	NA	0.080975	10.6715	0.01239	4.25627	0.22581	NA	NA	NA	NA	NA	79.3803	3.35792	3.49809	79.0612	8.11706	8.19431	NA	NA	NA	93.6818	NA		79.3803	3.35792	4.23017	3.49809	4.40815
UK013	UK013_424	NA	100	1890	216.6	3.14369	NA	NA	80.6452	5.34666	0.063	17.1563	NA	NA	0.107712	17.9701	0.0124	5.34666	-0.41926	NA	NA	NA	NA	NA	79.444	4.22153	4.33404	103.87	17.7444	17.8042	NA	NA	NA	1.49249	NA		79.444	4.22153	5.31385	4.33404	5.25716
UK013	UK013_187	NA	97	2300	210.6	1.34311	NA	NA	80	5.31738	0.04	16.7365	NA	NA	0.06894	17.5609	0.0125	5.31738	0.31154	NA	NA	NA	NA	NA	80.0807	4.23185	4.34586	67.6931	11.5004	11.5409	NA	NA	NA	2.28196	NA		80.0807	4.23185	5.28449	4.34586	5.4478
UK013	UK013_610	NA	294	5180	509.7	1.49912	NA	NA	80	3.62449	0.054	14.5934	NA	NA	0.093069	15.0368	0.0125	3.62449	-0.043689	NA	NA	NA	NA	NA	80.0807	2.88456	3.04937	90.3583	13.0007	13.0631	NA	NA	NA	12.7843	NA		80.0807	2.88456	3.60207	3.04937	3.78143
UK013	UK013_278	NA	203	3940	418	0.878151	NA	NA	79.0514	4.24023	0.048	14.3674	NA	NA	0.0837207	14.98	0.01265	4.24023	-0.45019	NA	NA	NA	NA	NA	81.0357	3.41459	3.55819	81.637	11.7511	11.808	NA	NA	NA	92.9713	NA		81.0357	3.41459	4.21369	3.55819	4.38569
UK013	UK013_617	NA	268	6040	615	1.70833	NA	NA	78.4314	3.76094	0.0437	14.0761	NA	NA	0.0768233	14.5698	0.01275	3.76094	-0.10349	NA	NA	NA	NA	NA	81.6722	3.05226	3.21454	75.1539	10.5548	10.6088	NA	NA	NA	24.6824	NA		81.6722	3.05226	3.73721	3.21454	3.96755
UK013	UK013_94	NA	327	6490	534	3.76056	NA	NA	78.3085	3.73536	0.0538	11.8145	NA	NA	0.0947271	12.391	0.01277	3.73536	0.1239	NA	NA	NA	NA	NA	81.7995	3.0362	3.19979	91.8974	10.8873	10.9643	NA	NA	NA	6.59639	NA		81.7995	3.0362	3.71176	3.19979	3.89159
UK013	UK013_204	NA	830	18420	1744	1.77056	NA	NA	77.9423	3.36047	0.0484	8.48321	NA	NA	0.0856196	9.12456	0.01283	3.36047	0.11753	NA	NA	NA	NA	NA	82.1814	2.74415	2.92574	83.4146	7.30709	7.40206	NA	NA	NA	74.2297	NA		82.1814	2.74415	3.33914	2.92574	3.5552
UK013	UK013_197	NA	118	2150	200.5	1.11824	NA	NA	77.821	4.54639	0.056	13.5382	NA	NA	0.0992184	14.2812	0.01285	4.54639	-0.043877	NA	NA	NA	NA	NA	82.3087	3.71829	3.85466	96.0547	13.0896	13.1593	NA	NA	NA	4.70061	NA		82.3087	3.71829	4.51749	3.85466	4.61918
UK013	UK013_232	NA	159	3300	336.1	1.04314	NA	NA	77.821	4.12649	0.053	14.4326	NA	NA	0.0939032	15.011	0.01285	4.12649	0.34018	NA	NA	NA	NA	NA	82.3087	3.37487	3.52456	91.1329	13.0847	13.1478	NA	NA	NA	15.4896	NA		82.3087	3.37487	4.10026	3.52456	4.29333
UK013	UK013_573	NA	71	1460	125.5	1.3597	NA	NA	75.188	5.7255	0.047	17.9041	NA	NA	0.0861888	18.7973	0.0133	5.7255	0.27992	NA	NA	NA	NA	NA	85.1722	4.84446	4.95723	83.9468	15.1462	15.1928	NA	NA	NA	86.6188	NA		85.1722	4.84446	5.68784	4.95723	5.82142
UK013	UK013_554	NA	236	4810	442	1.2173	NA	NA	75.1315	4.24116	0.0506	11.8204	NA	NA	0.0928602	12.5583	0.01331	4.24116	0.47127	NA	NA	NA	NA	NA	85.2358	3.59119	3.74215	90.1643	10.8353	10.9099	NA	NA	NA	30.9631	NA		85.2358	3.59119	4.21324	3.74215	4.40528
UK013	UK013_283	NA	193	4240	412	1.83683	NA	NA	74.3494	4.43295	0.0458	10.6099	NA	NA	0.0849355	11.4987	0.01345	4.43295	-0.30426	NA	NA	NA	NA	NA	86.1264	3.79255	3.93872	82.7745	9.14063	9.21561	NA	NA	NA	53.8498	NA		86.1264	3.79255	4.40347	3.93872	4.61085
UK013	UK013_178	NA	416	7900	622	1.30672	NA	NA	73.2064	3.53027	0.0491	9.57608	NA	NA	0.0924769	10.2061	0.01366	3.53027	0.16898	NA	NA	NA	NA	NA	87.462	3.06679	3.25122	89.8081	8.77246	8.8637	NA	NA	NA	59.3844	NA		87.462	3.06679	3.50643	3.25122	3.71107
UK013	UK013_247	NA	215	4350	432.6	1.42209	NA	NA	73.046	4.39097	0.048	14.328	NA	NA	0.0906037	14.9857	0.01369	4.39097	0.32296	NA	NA	NA	NA	NA	87.6528	3.82276	3.97287	88.0656	12.6418	12.703	NA	NA	NA	94.5006	NA		87.6528	3.82276	4.36125	3.97287	4.53266
UK013	UK013_304	NA	214	4070	335	1.02134	NA	NA	72.7273	3.60221	0.0482	11.6842	NA	NA	0.09138	12.2269	0.01375	3.60221	-0.18078	NA	NA	NA	NA	NA	88.0343	3.14963	3.33175	88.7881	10.3953	10.4707	NA	NA	NA	89.477	NA		88.0343	3.14963	3.57773	3.33175	3.78066
UK013	UK013_367	NA	258	5960	516	1.15179	NA	NA	72.5163	3.3618	0.0459	12.0336	NA	NA	0.0872727	12.4944	0.01379	3.3618	0.053431	NA	NA	NA	NA	NA	88.2887	2.94786	3.14278	84.9596	10.1836	10.2544	NA	NA	NA	52.3386	NA		88.2887	2.94786	3.33889	3.14278	3.56844
UK013	UK013_37	NA	125	2180	163.5	0.906822	NA	NA	72.4638	4.98123	0.058	16.5949	NA	NA	0.110359	17.3264	0.0138	4.98123	0.55734	NA	NA	NA	NA	NA	88.3523	4.37101	4.50495	106.294	17.4874	17.5507	NA	NA	NA	2.18243	NA		88.3523	4.37101	4.94725	4.50495	5.20272
UK013	UK013_326	NA	252	4310	330.9	0.75034	NA	NA	72.0461	4.00868	0.0564	12.174	NA	NA	0.107937	12.817	0.01388	4.00868	0.26617	NA	NA	NA	NA	NA	88.861	3.53771	3.70377	104.076	12.6793	12.7631	NA	NA	NA	1.34613	NA		88.861	3.53771	3.98118	3.70377	4.1662
UK013	UK013_535	NA	32	486	48.9	2.01566	NA	NA	71.9424	6.16351	0.063	29.8542	NA	NA	0.120742	30.4838	0.0139	6.16351	0.65481	NA	NA	NA	NA	NA	88.9881	5.44711	5.5567	115.744	33.3585	33.3976	NA	NA	NA	7.97651	NA		88.9881	5.44711	6.12117	5.5567	6.43366
UK013	UK013_429	NA	115	1810	183.5	0.931472	NA	NA	71.6846	4.04753	0.055	21.2321	NA	NA	0.105788	21.6145	0.01395	4.04753	0.1866	NA	NA	NA	NA	NA	89.306	3.58977	3.75512	102.105	20.9992	21.0481	NA	NA	NA	21.7567	NA		89.306	3.58977	4.01963	3.75512	4.20667
UK013	UK013_338	NA	77	1266	100	1.60256	NA	NA	71.4286	4.93598	0.058	18.3671	NA	NA	0.111959	19.0188	0.014	4.93598	0.19454	NA	NA	NA	NA	NA	89.6239	4.39321	4.53027	107.755	19.4462	19.5047	NA	NA	NA	5.96009	NA		89.6239	4.39321	4.90183	4.53027	5.04825
UK013	UK013_602	NA	53	1250	108.4	1.3601	NA	NA	71.4286	6.12994	0.042	24.8421	NA	NA	0.0810734	25.5872	0.014	6.12994	0.13644	NA	NA	NA	NA	NA	89.6239	5.45587	5.56684	79.1537	19.4863	19.5187	NA	NA	NA	28.068	NA		89.6239	5.45587	6.08752	5.56684	6.24129
UK013	UK013_82	NA	1266	26670	1987	0.64513	NA	NA	70.922	3.08938	0.0501	7.46736	NA	NA	0.0973998	8.0812	0.0141	3.08938	0.055656	NA	NA	NA	NA	NA	90.2596	2.76903	2.98462	94.3733	7.28293	7.40339	NA	NA	NA	28.2676	NA		90.2596	2.76903	3.06785	2.98462	3.29001
UK013	UK013_192	NA	167	4010	338	0.828431	NA	NA	70.5219	3.85847	0.0437	12.368	NA	NA	0.0854395	12.9559	0.01418	3.85847	-0.036616	NA	NA	NA	NA	NA	90.7681	3.47772	3.65361	83.2462	10.3553	10.4223	NA	NA	NA	17.1866	NA		90.7681	3.47772	3.83143	3.65361	4.06254
UK013	UK013_351	NA	85	2270	175.9	1.45613	NA	NA	69.6864	4.56544	0.05	22.2134	NA	NA	0.0989289	22.6777	0.01435	4.56544	0.21877	NA	NA	NA	NA	NA	91.8486	4.16356	4.31502	95.7872	20.7321	20.776	NA	NA	NA	69.7566	NA		91.8486	4.16356	4.53307	4.31502	4.69876
UK013	UK013_4	NA	2300	48500	3400	0.867347	NA	NA	69.1563	3.31569	0.0473	6.98406	NA	NA	0.0943041	7.73116	0.01446	3.31569	0.25614	NA	NA	NA	NA	NA	92.5476	3.04667	3.25358	91.505	6.76509	6.88725	NA	NA	NA	75.445	NA		92.5476	3.04667	3.292	3.25358	3.51915
UK013	UK013_9	NA	89	2540	179.4	1.45499	NA	NA	68.9655	4.82929	0.04	16.7989	NA	NA	0.0799704	17.4793	0.0145	4.82929	0.095411	NA	NA	NA	NA	NA	92.8018	4.44956	4.59449	78.1171	13.143	13.1898	NA	NA	NA	2.82175	NA		92.8018	4.44956	4.79469	4.59449	5.01458
UK013	UK013_218	NA	56	999	88.2	1.61538	NA	NA	68.9655	5.96982	0.061	21.4478	NA	NA	0.121955	22.2631	0.0145	5.96982	0.28434	NA	NA	NA	NA	NA	92.8018	5.50042	5.6183	116.843	24.5768	24.6307	NA	NA	NA	4.4186	NA		92.8018	5.50042	5.92706	5.6183	6.07891
UK013	UK013_549	NA	42	1090	93.4	1.48963	NA	NA	68.9655	5.96982	0.046	22.2616	NA	NA	0.091966	23.0482	0.0145	5.96982	0.50229	NA	NA	NA	NA	NA	92.8018	5.50042	5.6183	89.3331	19.7124	19.7528	NA	NA	NA	69.2908	NA		92.8018	5.50042	5.92706	5.6183	6.03651
UK013	UK013_266	NA	171	3710	363	1.0708	NA	NA	68.918	4.26035	0.0453	10.405	NA	NA	0.0906289	11.2435	0.01451	4.26035	0.42831	NA	NA	NA	NA	NA	92.8653	3.92803	4.09169	88.0891	9.48707	9.56845	NA	NA	NA	26.4065	NA		92.8653	3.92803	4.22981	4.09169	4.40463
UK013	UK013_365	NA	183	3740	302.6	1.78315	NA	NA	68.7758	3.90748	0.05	13.3168	NA	NA	0.100239	13.8782	0.01454	3.90748	0.10692	NA	NA	NA	NA	NA	93.056	3.61003	3.78816	96.9967	12.8392	12.9116	NA	NA	NA	54.3787	NA		93.056	3.61003	3.87942	3.78816	4.06263
UK013	UK013_458	NA	56	1126	109.6	1.42153	NA	NA	68.4932	4.80899	0.05	23.3506	NA	NA	0.100652	23.8407	0.0146	4.80899	0.058249	NA	NA	NA	NA	NA	93.4372	4.46098	4.60749	97.3784	22.1407	22.1831	NA	NA	NA	72.453	NA		93.4372	4.46098	4.77431	4.60749	4.92525
UK013	UK013_251	NA	124	2220	207.6	1.83069	NA	NA	68.306	3.85336	0.05	16.772	NA	NA	0.100928	17.2089	0.01464	3.85336	0.30155	NA	NA	NA	NA	NA	93.6913	3.58416	3.7659	97.6327	16.0204	16.0792	NA	NA	NA	60.7694	NA		93.6913	3.58416	3.82549	3.7659	4.02272
UK013	UK013_490	NA	140	3230	297	1.16016	NA	NA	68.0272	4.78902	0.052	17.8642	NA	NA	0.105395	18.4949	0.0147	4.78902	-0.11881	NA	NA	NA	NA	NA	94.0725	4.47244	4.62054	101.745	17.9074	17.9643	NA	NA	NA	41.993	NA		94.0725	4.47244	4.75425	4.62054	4.87926
UK013	UK013_514	NA	76	1500	132.9	1.70385	NA	NA	68.0272	4.78902	0.056	21.1665	NA	NA	0.113503	21.7015	0.0147	4.78902	0.20802	NA	NA	NA	NA	NA	94.0725	4.47244	4.62054	109.165	22.4649	22.5168	NA	NA	NA	17.2687	NA		94.0725	4.47244	4.75425	4.62054	4.9136
UK013	UK013_140	NA	33	900	65.5	1.31526	NA	NA	67.5676	7.68921	0.038	24.9021	NA	NA	0.0775437	26.0622	0.0148	7.68921	0.017438	NA	NA	NA	NA	NA	94.7078	7.22905	7.32283	75.833	19.046	19.0765	NA	NA	NA	6.04651	NA		94.7078	7.22905	7.633	7.32283	7.92853
UK013	UK013_215	NA	244	4800	415	1.10372	NA	NA	67.5676	3.44004	0.0533	9.93011	NA	NA	0.108765	10.5091	0.0148	3.44004	-0.2967	NA	NA	NA	NA	NA	94.7078	3.23417	3.43869	104.835	10.4679	10.5707	NA	NA	NA	8.82048	NA		94.7078	3.23417	3.4149	3.43869	3.57528
UK013	UK013_372	NA	32	655	54.52	1.65212	NA	NA	67.5676	5.87958	0.05	28.2144	NA	NA	0.102031	28.8205	0.0148	5.87958	0.47717	NA	NA	NA	NA	NA	94.7078	5.52772	5.64981	98.6496	27.1003	27.1358	NA	NA	NA	75.2397	NA		94.7078	5.52772	5.8366	5.64981	5.98191
UK013	UK013_456	NA	315	6160	586	1.0713	NA	NA	67.2495	3.61191	0.053	13.2169	NA	NA	0.108665	13.7015	0.01487	3.61191	0.197	NA	NA	NA	NA	NA	95.1525	3.41158	3.60782	104.743	13.6368	13.7157	NA	NA	NA	15.3837	NA		95.1525	3.41158	3.58539	3.60782	3.78661
UK013	UK013_385	NA	61	1610	134.8	1.05892	NA	NA	66.6667	5.26257	0.038	19.8768	NA	NA	0.0785916	20.5616	0.015	5.26257	-0.070675	NA	NA	NA	NA	NA	95.9782	5.0135	5.15136	76.8199	15.2138	15.253	NA	NA	NA	1.82373	NA		95.9782	5.0135	5.22359	5.15136	5.49494
UK013	UK013_423	NA	72	1390	131.8	1.17052	NA	NA	66.6667	5.53919	0.055	23.9455	NA	NA	0.113751	24.5778	0.015	5.53919	0.17881	NA	NA	NA	NA	NA	95.9782	5.27703	5.40818	109.391	25.4937	25.5396	NA	NA	NA	28.8096	NA		95.9782	5.27703	5.49816	5.40818	5.63053
UK013	UK013_167	NA	85	1970	136.4	1.19127	NA	NA	66.5336	4.44917	0.041	18.5841	NA	NA	0.0849658	19.1092	0.01503	4.44917	-0.16605	NA	NA	NA	NA	NA	96.1687	4.24695	4.40947	82.8029	15.1962	15.2414	NA	NA	NA	10.2196	NA		96.1687	4.24695	4.41615	4.40947	4.65475
UK013	UK013_527	NA	95	1730	148.3	1.40303	NA	NA	66.2252	5.51328	0.057	16.9853	NA	NA	0.118673	17.8577	0.0151	5.51328	0.16987	NA	NA	NA	NA	NA	96.6132	5.28684	5.41946	113.869	19.2379	19.3035	NA	NA	NA	7.2513	NA		96.6132	5.28684	5.47217	5.41946	5.58162
UK013	UK013_390	NA	109	1970	174.7	1.91557	NA	NA	65.7895	5.7655	0.053	15.4547	NA	NA	0.111076	16.4951	0.0152	5.7655	0.056147	NA	NA	NA	NA	NA	97.2483	5.56477	5.69254	106.949	16.7456	16.8125	NA	NA	NA	26.5234	NA		97.2483	5.56477	5.72223	5.69254	5.80478
UK013	UK013_460	NA	45	950	89.3	1.64457	NA	NA	65.7895	6.3355	0.047	20.0208	NA	NA	0.0985015	20.9993	0.0152	6.3355	-0.13538	NA	NA	NA	NA	NA	97.2483	6.11492	6.23142	95.3921	19.1218	19.1689	NA	NA	NA	85.857	NA		97.2483	6.11492	6.28795	6.23142	6.42278
UK013	UK013_563	NA	81	1540	120.4	1.39837	NA	NA	65.7895	5.21591	0.057	18.5621	NA	NA	0.119459	19.281	0.0152	5.21591	-0.22465	NA	NA	NA	NA	NA	97.2483	5.03431	5.1752	114.582	20.8946	20.9557	NA	NA	NA	12.7053	NA		97.2483	5.03431	5.17676	5.1752	5.23312
UK013	UK013_269	NA	370	7430	681	1.2729	NA	NA	65.6599	4.09242	0.0485	11.804	NA	NA	0.101846	12.4933	0.01523	4.09242	-0.28179	NA	NA	NA	NA	NA	97.4388	3.95762	4.13603	98.4787	11.726	11.8075	NA	NA	NA	87.661	NA		97.4388	3.95762	4.06165	4.13603	4.2375
UK013	UK013_374	NA	196	3620	290	1.66189	NA	NA	65.3168	3.93129	0.054	13.4043	NA	NA	0.113991	13.9689	0.01531	3.93129	-0.27759	NA	NA	NA	NA	NA	97.9467	3.82146	4.0078	109.61	14.5148	14.5956	NA	NA	NA	14.6716	NA		97.9467	3.82146	3.90157	4.0078	4.03598
UK013	UK013_449	NA	144	3560	327.2	1.38176	NA	NA	65.3168	3.76792	0.0418	12.1931	NA	NA	0.0882374	12.762	0.01531	3.76792	0.28102	NA	NA	NA	NA	NA	97.9467	3.66266	3.85669	85.8601	10.5074	10.5774	NA	NA	NA	1.61767	NA		97.9467	3.66266	3.73944	3.85669	3.95076
UK013	UK013_11	NA	67	1540	98.1	2.26037	NA	NA	65.1042	4.05448	0.043	16.251	NA	NA	0.091067	16.7492	0.01536	4.05448	0.28359	NA	NA	NA	NA	NA	98.2642	3.95389	4.13541	88.4968	14.1958	14.2509	NA	NA	NA	14.9299	NA		98.2642	3.95389	4.02374	4.13541	4.20816
UK013	UK013_626	NA	108	2260	187.7	3.06699	NA	NA	64.9351	5.43787	0.0454	13.4422	NA	NA	0.0964002	14.5005	0.0154	5.43787	0.3144	NA	NA	NA	NA	NA	98.5181	5.31656	5.4536	93.448	12.9463	13.0131	NA	NA	NA	41.0618	NA		98.5181	5.31656	5.39653	5.4536	5.54831
UK013	UK013_159	NA	139	2770	182.2	1.01054	NA	NA	64.7249	4.13159	0.049	13.4582	NA	NA	0.104382	14.0781	0.01545	4.13159	0.28343	NA	NA	NA	NA	NA	98.8355	4.05233	4.23164	100.813	13.5116	13.5856	NA	NA	NA	76.041	NA		98.8355	4.05233	4.10008	4.23164	4.28105
UK013	UK013_33	NA	41	570	37.8	1.77298	NA	NA	64.5161	9.49986	0.07	28.473	NA	NA	0.1496	30.016	0.0155	9.49986	0.42414	NA	NA	NA	NA	NA	99.153	9.34733	9.42695	141.558	39.6815	39.7295	NA	NA	NA	2.3875	NA		99.153	9.34733	9.42718	9.42695	9.72937
UK013	UK013_175	NA	100	1810	124.1	1.72122	NA	NA	64.5161	5.14854	0.052	18.078	NA	NA	0.111131	18.7968	0.0155	5.14854	0.10058	NA	NA	NA	NA	NA	99.153	5.06587	5.21132	107	19.0913	19.1501	NA	NA	NA	41.6606	NA		99.153	5.06587	5.10915	5.21132	5.23828
UK013	UK013_395	NA	85	1510	128.8	1.4343	NA	NA	64.3501	4.3236	0.054	16.1988	NA	NA	0.115703	16.7659	0.01554	4.3236	0.60032	NA	NA	NA	NA	NA	99.4069	4.26498	4.43762	111.169	17.6562	17.7245	NA	NA	NA	13.1202	NA		99.4069	4.26498	4.29043	4.43762	4.52449
UK013	UK013_564	NA	106	2390	183.3	1.26327	NA	NA	64.0205	3.8383	0.047	14.2272	NA	NA	0.101223	14.7359	0.01562	3.8383	0.17205	NA	NA	NA	NA	NA	99.9147	3.80546	3.9999	97.9048	13.7543	13.8231	NA	NA	NA	76.7761	NA		99.9147	3.80546	3.80871	3.9999	4.00571
UK013	UK013_295	NA	231	4370	335	1.51652	NA	NA	63.7755	3.95432	0.054	13.2838	NA	NA	0.116746	13.8598	0.01568	3.95432	0.11156	NA	NA	NA	NA	NA	100.295	3.93532	4.12503	112.117	14.7131	14.7963	NA	NA	NA	11.2031	NA		100.295	3.93532	3.92372	4.12503	4.09347
UK013	UK013_67	NA	80	1540	103	1.39189	NA	NA	63.6943	5.90361	0.057	19.319	NA	NA	0.123389	20.2009	0.0157	5.90361	-0.39765	NA	NA	NA	NA	NA	100.422	5.88261	6.0115	118.14	22.5329	22.593	NA	NA	NA	16.6537	NA		100.422	5.88261	5.85787	6.0115	5.84859
UK013	UK013_344	NA	126	2330	160.2	2.68792	NA	NA	63.4115	4.22361	0.058	16.5895	NA	NA	0.126113	17.1187	0.01577	4.22361	-0.18565	NA	NA	NA	NA	NA	100.867	4.22706	4.40619	120.599	19.4685	19.5407	NA	NA	NA	5.83099	NA		100.867	4.22706	4.19074	4.40619	4.30411
UK013	UK013_572	NA	335	6540	485	0.888278	NA	NA	63.4115	3.82412	0.0522	10.2449	NA	NA	0.113502	10.9353	0.01577	3.82412	-0.11342	NA	NA	NA	NA	NA	100.867	3.82724	4.02422	109.164	11.3186	11.4212	NA	NA	NA	18.0477	NA		100.867	3.82724	3.79436	4.02422	3.94832
UK013	UK013_81	NA	121	2440	169.4	2.12015	NA	NA	63.2911	5.08415	0.047	18.4461	NA	NA	0.10239	19.1339	0.0158	5.08415	0.16536	NA	NA	NA	NA	NA	101.057	5.09784	5.24788	98.9798	18.0468	18.1004	NA	NA	NA	81.6508	NA		101.057	5.09784	5.04451	5.24788	5.19659
UK013	UK013_68	NA	413	9820	671	0.946403	NA	NA	63.0517	4.12434	0.043	9.55528	NA	NA	0.0940314	10.4074	0.01586	4.12434	0.26352	NA	NA	NA	NA	NA	101.438	4.1509	4.33519	91.2519	9.08293	9.1738	NA	NA	NA	2.2071	NA		101.438	4.1509	4.09206	4.33519	4.31432
UK013	UK013_272	NA	143	2970	246.8	1.3983	NA	NA	62.8931	4.81403	0.05	15.045	NA	NA	0.109615	15.7964	0.0159	4.81403	0.14494	NA	NA	NA	NA	NA	101.692	4.85706	5.01625	105.613	15.846	15.915	NA	NA	NA	62.2137	NA		101.692	4.85706	4.77626	5.01625	4.92353
UK013	UK013_317	NA	58	1040	72.1	1.56399	NA	NA	62.5	6.64115	0.049	17.5588	NA	NA	0.108098	18.7727	0.016	6.64115	0.21844	NA	NA	NA	NA	NA	102.326	6.74198	6.85898	104.224	18.5971	18.6545	NA	NA	NA	83.6205	NA		102.326	6.74198	6.58872	6.85898	6.69642
UK013	UK013_532	NA	66	1140	91.7	1.04561	NA	NA	62.5	7.2032	0.064	25.4689	NA	NA	0.141189	26.468	0.016	7.2032	-0.12995	NA	NA	NA	NA	NA	102.326	7.31257	7.42058	134.102	33.2621	33.3138	NA	NA	NA	7.29103	NA		102.326	7.31257	7.14633	7.42058	7.10292
UK013	UK013_438	NA	121	2230	198.9	1.11429	NA	NA	62.3441	4.1453	0.057	17.5534	NA	NA	0.126061	18.0363	0.01604	4.1453	0.097937	NA	NA	NA	NA	NA	102.58	4.21859	4.40404	120.552	20.5047	20.5733	NA	NA	NA	8.24456	NA		102.58	4.21859	4.11249	4.40404	4.27736
UK013	UK013_13	NA	513	10830	697	3.46421	NA	NA	62.1891	3.48149	0.0466	9.63199	NA	NA	0.103317	10.2419	0.01608	3.48149	0.60491	NA	NA	NA	NA	NA	102.834	3.55174	3.77118	99.8339	9.73857	9.83916	NA	NA	NA	45.8009	NA		102.834	3.55174	3.45386	3.77118	3.6538
UK013	UK013_611	NA	132	2960	218.2	1.09319	NA	NA	62.1891	4.14039	0.0428	14.1327	NA	NA	0.0948923	14.7267	0.01608	4.14039	0.52418	NA	NA	NA	NA	NA	102.834	4.22393	4.41005	92.0506	12.9604	13.0254	NA	NA	NA	5.54803	NA		102.834	4.22393	4.10754	4.41005	4.25129
UK013	UK013_26	NA	79	1910	128.5	2.23868	NA	NA	62.1118	4.77752	0.0458	14.3622	NA	NA	0.10167	15.136	0.0161	4.77752	0.11924	NA	NA	NA	NA	NA	102.961	4.8799	5.04225	98.3167	14.1844	14.2517	NA	NA	NA	51.9236	NA		102.961	4.8799	4.73958	5.04225	4.91394
UK013	UK013_290	NA	68	1170	93.3	1.52951	NA	NA	62.1118	6.88596	0.061	18.5021	NA	NA	0.135412	19.742	0.0161	6.88596	0.28592	NA	NA	NA	NA	NA	102.961	7.03351	7.14711	128.949	23.9114	23.9781	NA	NA	NA	2.50868	NA		102.961	7.03351	6.83126	7.14711	6.94112
UK013	UK013_417	NA	100	1890	163.6	0.898407	NA	NA	61.7284	4.75967	0.054	13.9426	NA	NA	0.120617	14.7327	0.0162	4.75967	0.18891	NA	NA	NA	NA	NA	103.595	4.89138	5.05532	115.632	16.1027	16.1833	NA	NA	NA	13.261	NA		103.595	4.89138	4.72163	5.05532	4.86043
UK013	UK013_240	NA	101	2140	178.6	2.2409	NA	NA	61.3497	5.74315	0.0427	14.0212	NA	NA	0.0959659	15.1518	0.0163	5.74315	0.24684	NA	NA	NA	NA	NA	104.229	5.93792	6.07531	93.0457	13.4722	13.536	NA	NA	NA	9.14585	NA		104.229	5.93792	5.69698	6.07531	5.88556
UK013	UK013_561	NA	122	2080	153.1	1.91855	NA	NA	61.3497	4.74209	0.059	15.0549	NA	NA	0.132599	15.7841	0.0163	4.74209	-0.057122	NA	NA	NA	NA	NA	104.229	4.9029	5.06843	126.431	18.7657	18.8476	NA	NA	NA	2.52713	NA		104.229	4.9029	4.70396	5.06843	4.78739
UK013	UK013_267	NA	552	10680	915	2.33418	NA	NA	61.0874	3.80803	0.0485	9.87926	NA	NA	0.109469	10.5878	0.01637	3.80803	-0.40679	NA	NA	NA	NA	NA	104.673	3.95381	4.15897	105.48	10.6078	10.7104	NA	NA	NA	89.9289	NA		104.673	3.95381	3.77728	4.15897	3.96713
UK013	UK013_57	NA	189	4350	275	2.2	NA	NA	60.9756	4.49377	0.0431	13.2748	NA	NA	0.0974591	14.0148	0.0164	4.49377	0.082622	NA	NA	NA	NA	NA	104.864	4.67421	4.84961	94.4282	12.6379	12.7078	NA	NA	NA	10.9816	NA		104.864	4.67421	4.45742	4.84961	4.67131
UK013	UK013_407	NA	261	5060	431.5	1.83072	NA	NA	60.9013	3.6246	0.0511	9.72995	NA	NA	0.11569	10.3831	0.01642	3.6246	0.60773	NA	NA	NA	NA	NA	104.99	3.77466	3.99031	111.157	10.9327	11.0426	NA	NA	NA	17.9078	NA		104.99	3.77466	3.59524	3.99031	3.8299
UK013	UK013_382	NA	277	5140	399	2.59091	NA	NA	60.8643	3.59014	0.0539	11.3482	NA	NA	0.122103	11.9025	0.01643	3.59014	-0.14884	NA	NA	NA	NA	NA	105.054	3.74102	3.95875	116.977	13.1519	13.2526	NA	NA	NA	9.45907	NA		105.054	3.74102	3.56105	3.95875	3.72409
UK013	UK013_383	NA	246	5600	442	1.46358	NA	NA	60.7903	3.44639	0.0449	10.9278	NA	NA	0.101839	11.4584	0.01645	3.44639	0.24973	NA	NA	NA	NA	NA	105.181	3.59553	3.82208	98.4723	10.7539	10.8427	NA	NA	NA	19.7885	NA		105.181	3.59553	3.41843	3.82208	3.64098
UK013	UK013_286	NA	132	2590	205.8	1.14333	NA	NA	60.6061	5.43787	0.049	13.7256	NA	NA	0.111476	14.7635	0.0165	5.43787	0.035646	NA	NA	NA	NA	NA	105.498	5.69015	5.83682	107.315	15.036	15.111	NA	NA	NA	81.9189	NA		105.498	5.69015	5.39362	5.83682	5.52161
UK013	UK013_413	NA	703	15840	1345	10.8555	NA	NA	60.3865	3.50153	0.0452	8.09977	NA	NA	0.103205	8.82423	0.01656	3.50153	0.18523	NA	NA	NA	NA	NA	105.878	3.67708	3.90175	99.7303	8.38224	8.49867	NA	NA	NA	14.7352	NA		105.878	3.67708	3.47293	3.90175	3.70863
UK013	UK013_540	NA	227	3925	308.6	2.49676	NA	NA	60.1323	3.21891	0.0561	11.7284	NA	NA	0.128634	12.1621	0.01663	3.21891	0.11322	NA	NA	NA	NA	NA	106.322	3.39435	3.63847	122.87	14.0757	14.179	NA	NA	NA	1.98432	NA		106.322	3.39435	3.19251	3.63847	3.40642
UK013	UK013_115	NA	155	3550	221	1.60494	NA	NA	60.0601	4.11441	0.0457	10.7091	NA	NA	0.104914	11.4723	0.01665	4.11441	0.18858	NA	NA	NA	NA	NA	106.449	4.34379	4.53756	101.302	11.0611	11.1523	NA	NA	NA	35.2434	NA		106.449	4.34379	4.08063	4.53756	4.27933
UK013	UK013_217	NA	175	3560	268	2.07913	NA	NA	59.5238	4.05698	0.0539	12.4902	NA	NA	0.124853	13.1325	0.0168	4.05698	-0.095693	NA	NA	NA	NA	NA	107.4	4.32111	4.51925	119.462	14.8018	14.8949	NA	NA	NA	12.8885	NA		107.4	4.32111	4.02338	4.51925	4.16205
UK013	UK013_464	NA	637	12600	1066	2.90463	NA	NA	59.2768	3.39753	0.0502	8.29895	NA	NA	0.116767	8.96748	0.01687	3.39753	0.30521	NA	NA	NA	NA	NA	107.844	3.63355	3.86894	112.137	9.52074	9.64882	NA	NA	NA	34.6139	NA		107.844	3.63355	3.36927	3.86894	3.58308
UK013	UK013_53	NA	99	1740	105.9	1.55507	NA	NA	59.1716	4.64178	0.05	15.3211	NA	NA	0.116509	16.0089	0.0169	4.64178	-0.15835	NA	NA	NA	NA	NA	108.034	4.97292	5.14802	111.902	16.9639	17.0359	NA	NA	NA	67.4922	NA		108.034	4.97292	4.6031	5.14802	4.74616
UK013	UK013_63	NA	72	1450	94.1	1.14338	NA	NA	59.1716	4.20834	0.048	18.5047	NA	NA	0.111848	18.9772	0.0169	4.20834	0.092637	NA	NA	NA	NA	NA	108.034	4.50856	4.70098	107.655	19.3864	19.445	NA	NA	NA	96.8942	NA		108.034	4.50856	4.17327	4.70098	4.35188
UK013	UK013_559	NA	101	1800	127.9	1.05181	NA	NA	59.1716	4.42051	0.061	22.5626	NA	NA	0.14214	22.9916	0.0169	4.42051	0.17165	NA	NA	NA	NA	NA	108.034	4.73587	4.91941	134.949	29.0613	29.1211	NA	NA	NA	6.34803	NA		108.034	4.73587	4.38368	4.91941	4.556
UK013	UK013_172	NA	118	2460	149.9	2.49833	NA	NA	58.8235	5.08715	0.042	19.0755	NA	NA	0.0984463	19.7422	0.017	5.08715	-0.31918	NA	NA	NA	NA	NA	108.668	5.48178	5.64293	95.3412	17.9677	18.0178	NA	NA	NA	18.9015	NA		108.668	5.48178	5.04452	5.64293	5.28962
UK013	UK013_318	NA	275	5260	339	1.37805	NA	NA	58.7199	3.93578	0.0499	11.1637	NA	NA	0.11717	11.8372	0.01703	3.93578	0.22427	NA	NA	NA	NA	NA	108.858	4.24845	4.45515	112.503	12.6066	12.7042	NA	NA	NA	55.6191	NA		108.858	4.24845	3.90274	4.45515	4.08728
UK013	UK013_124	NA	79	1450	90.1	1.31533	NA	NA	58.4795	6.0483	0.054	20.9389	NA	NA	0.127318	21.795	0.0171	6.0483	0.24351	NA	NA	NA	NA	NA	109.302	6.55518	6.69208	121.685	24.9988	25.056	NA	NA	NA	30.9942	NA		109.302	6.55518	5.99732	6.69208	6.11958
UK013	UK013_155	NA	141	3040	177.9	2.71189	NA	NA	58.1395	4.17237	0.048	15.455	NA	NA	0.113834	16.0083	0.0172	4.17237	0.10531	NA	NA	NA	NA	NA	109.936	4.54803	4.74543	109.466	16.6137	16.6841	NA	NA	NA	95.532	NA		109.936	4.54803	4.13699	4.74543	4.31739
UK013	UK013_241	NA	199	3580	284.7	1.1668	NA	NA	58.1395	4.17237	0.055	13.2533	NA	NA	0.130434	13.8945	0.0172	4.17237	-0.13259	NA	NA	NA	NA	NA	109.936	4.54803	4.74543	124.488	16.2801	16.3717	NA	NA	NA	9.77103	NA		109.936	4.54803	4.13699	4.74543	4.26096
UK013	UK013_189	NA	624	12420	815	0.867021	NA	NA	57.4053	3.29886	0.0472	8.72276	NA	NA	0.113368	9.32571	0.01742	3.29886	-0.2921	NA	NA	NA	NA	NA	111.33	3.64108	3.89081	109.042	9.64223	9.76223	NA	NA	NA	68.4197	NA		111.33	3.64108	3.27054	3.89081	3.50825
UK013	UK013_623	NA	62	1428	105	1.94805	NA	NA	57.4053	3.86269	0.041	17.7912	NA	NA	0.0984767	18.2057	0.01742	3.86269	0.11603	NA	NA	NA	NA	NA	111.33	4.2634	4.47857	95.3692	16.5736	16.628	NA	NA	NA	5.31101	NA		111.33	4.2634	3.82953	4.47857	4.04446
UK013	UK013_316	NA	171	3690	230	1.59722	NA	NA	57.1429	4.13794	0.0435	13.1986	NA	NA	0.104961	13.8321	0.0175	4.13794	0.31958	NA	NA	NA	NA	NA	111.837	4.58782	4.7902	101.346	13.3421	13.4178	NA	NA	NA	9.53915	NA		111.837	4.58782	4.10225	4.7902	4.28753
UK013	UK013_152	NA	28	638	36.3	2.64964	NA	NA	56.4972	7.4008	0.051	30.5325	NA	NA	0.124464	31.4167	0.0177	7.4008	-0.441	NA	NA	NA	NA	NA	113.103	8.29757	8.41371	119.111	35.3236	35.3625	NA	NA	NA	76.2517	NA		113.103	8.29757	7.33626	8.41371	7.38973
UK013	UK013_281	NA	92	1660	125.5	1.5513	NA	NA	56.4972	4.73539	0.057	16.2949	NA	NA	0.139107	16.969	0.0177	4.73539	-0.045684	NA	NA	NA	NA	NA	113.103	5.30918	5.48892	132.248	21.0442	21.1237	NA	NA	NA	8.33748	NA		113.103	5.30918	4.69409	5.48892	4.79804
UK013	UK013_168	NA	402	8660	505.1	0.87691	NA	NA	55.8659	3.51811	0.0433	10.0279	NA	NA	0.106867	10.6272	0.0179	3.51811	-0.41056	NA	NA	NA	NA	NA	114.37	3.98819	4.22964	103.095	10.4186	10.5186	NA	NA	NA	7.23367	NA		114.37	3.98819	3.48709	4.22964	3.77607
UK013	UK013_619	NA	69	1210	85.8	1.86928	NA	NA	55.8659	5.14562	0.054	17.8598	NA	NA	0.133275	18.5863	0.0179	5.14562	0.40122	NA	NA	NA	NA	NA	114.37	5.83316	6.00082	127.036	22.1975	22.2674	NA	NA	NA	22.1038	NA		114.37	5.83316	5.10024	6.00082	5.27201
UK013	UK013_412	NA	241	5280	406.5	1.68184	NA	NA	55.2486	4.07338	0.0458	10.1589	NA	NA	0.1143	10.9451	0.0181	4.07338	-0.16762	NA	NA	NA	NA	NA	115.637	4.66833	4.8807	109.891	11.4002	11.5033	NA	NA	NA	37.6653	NA		115.637	4.66833	4.03707	4.8807	4.25922
UK013	UK013_494	NA	53	877	67.7	1.46855	NA	NA	55.2486	5.56394	0.067	25.9915	NA	NA	0.167207	26.5803	0.0181	5.56394	-0.034283	NA	NA	NA	NA	NA	115.637	6.37659	6.53367	156.992	38.6818	38.7415	NA	NA	NA	3.9438	NA		115.637	6.37659	5.51433	6.53367	5.59005
UK013	UK013_79	NA	163	3190	185.2	2.06007	NA	NA	54.3478	4.22979	0.051	13.9988	NA	NA	0.129387	14.6239	0.0184	4.22979	-0.22437	NA	NA	NA	NA	NA	117.536	4.92648	5.13465	123.546	17.013	17.0994	NA	NA	NA	52.2221	NA		117.536	4.92648	4.19146	5.13465	4.34148
UK013	UK013_440	NA	275	5140	390	2.22603	NA	NA	53.4188	3.74239	0.055	12.3363	NA	NA	0.141961	12.8914	0.01872	3.74239	0.44154	NA	NA	NA	NA	NA	119.561	4.43321	4.67119	134.789	16.2737	16.38	NA	NA	NA	4.20644	NA		119.561	4.43321	3.7079	4.67119	3.93508
UK013	UK013_294	NA	53	1031	69.3	1.60789	NA	NA	53.1915	4.9843	0.051	19.6016	NA	NA	0.132199	20.2254	0.0188	4.9843	0.12892	NA	NA	NA	NA	NA	120.067	5.92914	6.11061	126.072	23.9835	24.0473	NA	NA	NA	61.7018	NA		120.067	5.92914	4.93818	6.11061	5.08197
UK013	UK013_111	NA	159	3390	190.3	3.02544	NA	NA	52.9101	5.39789	0.051	16.3795	NA	NA	0.132903	17.2461	0.0189	5.39789	-0.19119	NA	NA	NA	NA	NA	120.7	6.45465	6.62346	126.702	20.5456	20.6208	NA	NA	NA	59.7408	NA		120.7	6.45465	5.34767	6.62346	5.45238
UK013	UK013_212	NA	98	2190	143.4	1.67719	NA	NA	52.356	4.72968	0.049	14.7323	NA	NA	0.129042	15.4729	0.0191	4.72968	0.12204	NA	NA	NA	NA	NA	121.965	5.71435	5.90826	123.236	17.9584	18.04	NA	NA	NA	88.8782	NA		121.965	5.71435	4.68522	5.90826	4.84114
UK013	UK013_92	NA	100	1680	92.9	1.72356	NA	NA	51.5464	5.30209	0.062	15.389	NA	NA	0.165842	16.2767	0.0194	5.30209	-0.28118	NA	NA	NA	NA	NA	123.863	6.50463	6.68087	155.804	23.5142	23.6107	NA	NA	NA	1.55766	NA		123.863	6.50463	5.25148	6.68087	5.22866
UK013	UK013_369	NA	801	16030	959	1.70035	NA	NA	50.6329	3.54721	0.0535	8.58418	NA	NA	0.145687	9.28821	0.01975	3.54721	0.062727	NA	NA	NA	NA	NA	126.076	4.42873	4.69259	138.097	11.9933	12.1437	NA	NA	NA	5.59947	NA		126.076	4.42873	3.51275	4.69259	3.68614
UK013	UK013_469	NA	457	8900	613	1.56777	NA	NA	49.3583	3.69995	0.0509	10.2131	NA	NA	0.142187	10.8626	0.02026	3.69995	-0.16249	NA	NA	NA	NA	NA	129.299	4.73634	4.9963	134.99	13.7313	13.8575	NA	NA	NA	45.5952	NA		129.299	4.73634	3.66309	4.9963	3.84023
UK013	UK013_31	NA	83	1610	83.6	1.41935	NA	NA	48.5437	5.2918	0.058	19.0483	NA	NA	0.164739	19.7697	0.0206	5.2918	-0.20414	NA	NA	NA	NA	NA	131.447	6.88547	7.07274	154.843	28.3995	28.4786	NA	NA	NA	12.9213	NA		131.447	6.88547	5.23822	7.07274	5.2942
UK013	UK013_99	NA	405	8800	451	1.33038	NA	NA	48.5437	3.55724	0.0485	9.93682	NA	NA	0.137756	10.5544	0.0206	3.55724	0.25185	NA	NA	NA	NA	NA	131.447	4.62853	4.90278	131.043	12.9762	13.1024	NA	NA	NA	94.9021	NA		131.447	4.62853	3.52122	4.90278	3.73031
UK013	UK013_252	NA	187	3580	236.9	1.22619	NA	NA	48.3092	3.84747	0.048	15.2618	NA	NA	0.136998	15.7393	0.0207	3.84747	0.31867	NA	NA	NA	NA	NA	132.078	5.02998	5.28579	130.366	19.2584	19.3429	NA	NA	NA	85.131	NA		132.078	5.02998	3.80833	5.28579	4.00115
UK013	UK013_279	NA	165	3590	242.2	1.38321	NA	NA	46.5116	4.77304	0.0478	13.6633	NA	NA	0.141699	14.473	0.0215	4.77304	0.33841	NA	NA	NA	NA	NA	137.129	6.4761	6.69195	134.556	18.2411	18.3357	NA	NA	NA	76.4081	NA		137.129	6.4761	4.72263	6.69195	4.88069
UK013	UK013_285	NA	132	2710	163.7	1.75456	NA	NA	46.2963	4.94122	0.0486	12.6123	NA	NA	0.144741	13.5457	0.0216	4.94122	0.34132	NA	NA	NA	NA	NA	137.76	6.73482	6.9445	137.258	17.3923	17.4952	NA	NA	NA	95.1046	NA		137.76	6.73482	4.8888	6.9445	5.04138
UK013	UK013_6	NA	406	7070	330.9	1.83426	NA	NA	45.8716	4.22453	0.0571	10.2426	NA	NA	0.17163	11.0796	0.0218	4.22453	-0.082356	NA	NA	NA	NA	NA	139.022	5.81015	6.05627	160.833	16.4814	16.627	NA	NA	NA	1.57534	NA		139.022	5.81015	4.1793	6.05627	4.27128
UK013	UK013_38	NA	563	11840	548.7	1.95476	NA	NA	45.7666	3.32596	0.0506	10.408	NA	NA	0.152442	10.9265	0.02185	3.32596	0.44665	NA	NA	NA	NA	NA	139.337	4.58457	4.89408	144.065	14.6766	14.8099	NA	NA	NA	47.7484	NA		139.337	4.58457	3.29027	4.89408	3.51856
UK013	UK013_153	NA	900	19740	924	3.43494	NA	NA	45.683	3.26807	0.0474	9.40718	NA	NA	0.143062	9.95868	0.02189	3.26807	0.059667	NA	NA	NA	NA	NA	139.59	4.51285	4.82805	135.768	12.6564	12.7946	NA	NA	NA	56.1354	NA		139.59	4.51285	3.23294	4.82805	3.46806
UK013	UK013_303	NA	304	5650	296	1.28139	NA	NA	45.5789	3.64356	0.0498	10.2673	NA	NA	0.150649	10.8946	0.02194	3.64356	-0.30448	NA	NA	NA	NA	NA	139.905	5.04261	5.32779	142.485	14.4843	14.6166	NA	NA	NA	75.787	NA		139.905	5.04261	3.60431	5.32779	3.79623
UK013	UK013_125	NA	584	11830	554	1.00435	NA	NA	45.4339	3.2743	0.0505	9.80357	NA	NA	0.153254	10.3359	0.02201	3.2743	-0.091138	NA	NA	NA	NA	NA	140.347	4.54571	4.86203	144.781	13.9474	14.0889	NA	NA	NA	55.6519	NA		140.347	4.54571	3.23891	4.86203	3.45163
UK013	UK013_104	NA	511	11010	518	0.866221	NA	NA	45.1875	3.25367	0.0517	8.79973	NA	NA	0.157751	9.38198	0.02213	3.25367	-0.44538	NA	NA	NA	NA	NA	141.104	4.54117	4.86106	148.733	12.9809	13.1406	NA	NA	NA	32.7438	NA		141.104	4.54117	3.21832	4.86106	3.40941
UK013	UK013_553	NA	446	10030	549	1.16809	NA	NA	44.7828	3.61066	0.0465	11.3944	NA	NA	0.143167	11.9528	0.02233	3.61066	0.083915	NA	NA	NA	NA	NA	142.365	5.08396	5.37659	135.861	15.2008	15.3162	NA	NA	NA	40.3621	NA		142.365	5.08396	3.57108	5.37659	3.79052
UK013	UK013_525	NA	1890	38740	2217	2.01362	NA	NA	44.603	3.12176	0.0509	7.85033	NA	NA	0.157346	8.44826	0.02242	3.12176	-0.32621	NA	NA	NA	NA	NA	142.932	4.4129	4.74963	148.377	11.6629	11.8396	NA	NA	NA	42.9181	NA		142.932	4.4129	3.08741	4.74963	3.29897
UK013	UK013_352	NA	375	8400	406	3.22734	NA	NA	44.3262	3.52761	0.0492	11.128	NA	NA	0.15304	11.6737	0.02256	3.52761	0.10134	NA	NA	NA	NA	NA	143.815	5.01705	5.3192	144.593	15.7338	15.8591	NA	NA	NA	92.268	NA		143.815	5.01705	3.48855	5.3192	3.69731
UK013	UK013_154	NA	636	12540	564	1.57103	NA	NA	44.2478	3.4149	0.0505	8.81239	NA	NA	0.157362	9.45091	0.0226	3.4149	-0.45723	NA	NA	NA	NA	NA	144.067	4.86518	5.17725	148.392	13.0485	13.2066	NA	NA	NA	58.6313	NA		144.067	4.86518	3.37702	5.17725	3.57127
UK013	UK013_107	NA	506	10590	490.5	1.5636	NA	NA	44.1501	3.32304	0.0492	8.96567	NA	NA	0.153651	9.56169	0.02265	3.32304	-0.0096924	NA	NA	NA	NA	NA	144.382	4.74455	5.0654	145.13	12.9315	13.0846	NA	NA	NA	91.3813	NA		144.382	4.74455	3.2861	5.0654	3.50613
UK013	UK013_17	NA	1067	23660	1070	1.10196	NA	NA	44.1306	3.17225	0.046	8.23452	NA	NA	0.143721	8.82442	0.02266	3.17225	-0.16137	NA	NA	NA	NA	NA	144.445	4.53121	4.86642	136.352	11.2599	11.4163	NA	NA	NA	20.4732	NA		144.445	4.53121	3.13697	4.86642	3.40274
UK013	UK013_59	NA	884	15850	725	1.68213	NA	NA	44.0335	3.59202	0.0527	8.24813	NA	NA	0.165017	8.99634	0.02271	3.59202	-0.027581	NA	NA	NA	NA	NA	144.76	5.14188	5.44084	155.085	12.9395	13.1124	NA	NA	NA	14.3239	NA		144.76	5.14188	3.55199	5.44084	3.72094
UK013	UK013_160	NA	579	11740	537	0.853736	NA	NA	43.6681	3.36431	0.0487	8.7182	NA	NA	0.153768	9.34481	0.0229	3.36431	0.22904	NA	NA	NA	NA	NA	145.958	4.8553	5.17588	145.233	12.6465	12.8033	NA	NA	NA	90.7406	NA		145.958	4.8553	3.32651	5.17588	3.54723
UK013	UK013_64	NA	326	6920	322.7	2.3418	NA	NA	43.4783	3.83242	0.0444	9.38381	NA	NA	0.140803	10.1362	0.023	3.83242	0.27452	NA	NA	NA	NA	NA	146.588	5.55448	5.83914	133.759	12.7037	12.8377	NA	NA	NA	3.73139	NA		146.588	5.55448	3.78917	5.83914	4.01058
UK013	UK013_88	NA	210	3640	173.1	1.35446	NA	NA	43.4783	4.58714	0.056	12.4252	NA	NA	0.177589	13.2449	0.023	4.58714	0.33111	NA	NA	NA	NA	NA	146.588	6.64833	6.88793	165.984	20.2842	20.4098	NA	NA	NA	4.46777	NA		146.588	6.64833	4.53538	6.88793	4.70099
UK013	UK013_129	NA	1230	25100	1140	1.70149	NA	NA	43.4405	3.31319	0.0497	7.67084	NA	NA	0.157748	8.35577	0.02302	3.31319	0.14628	NA	NA	NA	NA	NA	146.714	4.80602	5.1329	148.73	11.5607	11.7397	NA	NA	NA	73.3981	NA		146.714	4.80602	3.27577	5.1329	3.49347
UK013	UK013_378	NA	1071	21500	1129	1.18967	NA	NA	43.3463	3.29376	0.0513	7.61734	NA	NA	0.16318	8.29896	0.02307	3.29376	-0.48596	NA	NA	NA	NA	NA	147.029	4.78798	5.11736	153.483	11.822	12.0075	NA	NA	NA	38.2566	NA		147.029	4.78798	3.25648	5.11736	3.44558
UK013	UK013_499	NA	284	6510	389.8	2.00514	NA	NA	43.1779	3.57101	0.0462	13.0453	NA	NA	0.14753	13.5252	0.02316	3.57101	0.027503	NA	NA	NA	NA	NA	147.596	5.2108	5.51725	139.729	17.6578	17.7626	NA	NA	NA	38.757	NA		147.596	5.2108	3.53044	5.51725	3.75298
UK013	UK013_461	NA	180	3230	194.5	2.20772	NA	NA	42.9185	4.55341	0.057	14.4081	NA	NA	0.183118	15.1105	0.0233	4.55341	-0.089175	NA	NA	NA	NA	NA	148.478	6.68356	6.92795	170.74	23.7516	23.8646	NA	NA	NA	8.03975	NA		148.478	6.68356	4.50137	6.92795	4.60365
UK013	UK013_211	NA	1481	30520	1674	1.8809	NA	NA	42.8266	3.22864	0.0513	7.60924	NA	NA	0.16516	8.26587	0.02335	3.22864	-0.2114	NA	NA	NA	NA	NA	148.793	4.74899	5.08855	155.21	11.8976	12.0857	NA	NA	NA	35.0265	NA		148.793	4.74899	3.19167	5.08855	3.39315
UK013	UK013_296	NA	402	7650	405.8	0.91191	NA	NA	42.5532	3.801	0.054	10.0225	NA	NA	0.17497	10.719	0.0235	3.801	-0.11536	NA	NA	NA	NA	NA	149.738	5.62596	5.91895	163.723	16.2091	16.362	NA	NA	NA	11.7151	NA		149.738	5.62596	3.7572	5.91895	3.90473
UK013	UK013_534	NA	365	7620	419	2.3022	NA	NA	42.5532	3.93505	0.0458	13.4617	NA	NA	0.1484	14.025	0.0235	3.93505	-0.1682	NA	NA	NA	NA	NA	149.738	5.82437	6.10785	140.498	18.4044	18.5061	NA	NA	NA	35.8973	NA		149.738	5.82437	3.88971	6.10785	4.11153
UK013	UK013_200	NA	471	8900	456.2	1.30046	NA	NA	42.4088	3.54107	0.0543	9.33625	NA	NA	0.176541	9.98523	0.02358	3.54107	0.13369	NA	NA	NA	NA	NA	150.242	5.25866	5.57302	165.079	15.2145	15.3798	NA	NA	NA	5.57956	NA		150.242	5.25866	3.50013	5.57302	3.68413
UK013	UK013_133	NA	1370	29360	1286	3.62254	NA	NA	42.3729	3.21626	0.046	7.873	NA	NA	0.149683	8.50462	0.0236	3.21626	0.30236	NA	NA	NA	NA	NA	150.368	4.78026	5.12461	141.632	11.2433	11.4114	NA	NA	NA	10.4535	NA		150.368	4.78026	3.17904	5.12461	3.41964
UK013	UK013_557	NA	692	14900	761	1.82494	NA	NA	42.2476	3.38018	0.0493	8.97082	NA	NA	0.160896	9.58652	0.02367	3.38018	0.15275	NA	NA	NA	NA	NA	150.809	5.03845	5.3681	151.488	13.4918	13.6507	NA	NA	NA	92.0864	NA		150.809	5.03845	3.34095	5.3681	3.55825
UK013	UK013_633	NA	625	12720	692	2.07186	NA	NA	42.1053	3.46887	0.047	9.98383	NA	NA	0.153909	10.5693	0.02375	3.46887	0.16479	NA	NA	NA	NA	NA	151.313	5.18771	5.51049	145.357	14.3151	14.454	NA	NA	NA	40.694	NA		151.313	5.18771	3.42847	5.51049	3.65209
UK013	UK013_624	NA	486	8240	443	1.85666	NA	NA	42.0698	3.48941	0.053	9.0745	NA	NA	0.173703	9.72227	0.02377	3.48941	0.31627	NA	NA	NA	NA	NA	151.438	5.22273	5.54398	162.627	14.6109	14.7783	NA	NA	NA	10.8618	NA		151.438	5.22273	3.44874	5.54398	3.6569
UK013	UK013_635	NA	618	12330	675	0.873221	NA	NA	42.0345	3.32059	0.0494	8.89117	NA	NA	0.16204	9.49101	0.02379	3.32059	-0.010275	NA	NA	NA	NA	NA	151.564	4.97413	5.31098	152.487	13.4391	13.6006	NA	NA	NA	89.7869	NA		151.564	4.97413	3.28186	5.31098	3.50149
UK013	UK013_621	NA	325	5960	325	1.2218	NA	NA	42.0168	3.91433	0.0501	10.6183	NA	NA	0.164405	11.3168	0.0238	3.91433	0.14821	NA	NA	NA	NA	NA	151.627	5.86594	6.15441	154.552	16.2257	16.3631	NA	NA	NA	72.1905	NA		151.627	5.86594	3.86866	6.15441	4.05304
UK013	UK013_416	NA	321	6200	369	2.15789	NA	NA	41.7885	3.41137	0.0523	11.067	NA	NA	0.172562	11.5809	0.02393	3.41137	-0.50517	NA	NA	NA	NA	NA	152.446	5.13948	5.4698	161.64	17.307	17.447	NA	NA	NA	36.862	NA		152.446	5.13948	3.37135	5.4698	3.55145
UK013	UK013_138	NA	694	14420	614	1.77765	NA	NA	41.7362	3.60406	0.0496	8.89513	NA	NA	0.163859	9.59753	0.02396	3.60406	-0.37237	NA	NA	NA	NA	NA	152.635	5.43644	5.75047	154.075	13.721	13.8823	NA	NA	NA	86.1721	NA		152.635	5.43644	3.56173	5.75047	3.76004
UK013	UK013_210	NA	741	15190	792	1.52896	NA	NA	41.7362	3.4822	0.0531	8.92413	NA	NA	0.175421	9.57945	0.02396	3.4822	0.46073	NA	NA	NA	NA	NA	152.635	5.25261	5.57701	164.113	14.5174	14.6887	NA	NA	NA	7.84158	NA		152.635	5.25261	3.4413	5.57701	3.66664
UK013	UK013_599	NA	1047	21660	1072	1.77778	NA	NA	41.684	3.4498	0.0474	8.34952	NA	NA	0.156787	9.03414	0.02399	3.4498	-0.048452	NA	NA	NA	NA	NA	152.824	5.2101	5.53777	147.887	12.4335	12.5984	NA	NA	NA	47.0702	NA		152.824	5.2101	3.40923	5.53777	3.64268
UK013	UK013_308	NA	859	15860	747	2.40193	NA	NA	41.6493	3.61331	0.0495	9.08753	NA	NA	0.16387	9.77953	0.02401	3.61331	0.50035	NA	NA	NA	NA	NA	152.95	5.46149	5.77541	154.085	13.982	14.1403	NA	NA	NA	85.2473	NA		152.95	5.46149	3.57078	5.77541	3.7776
UK013	UK013_628	NA	602	12090	641	2.10855	NA	NA	41.6146	3.41806	0.0459	9.36184	NA	NA	0.152078	9.9663	0.02403	3.41806	-0.082941	NA	NA	NA	NA	NA	153.075	5.17058	5.50164	143.745	13.359	13.5047	NA	NA	NA	20.3381	NA		153.075	5.17058	3.3778	5.50164	3.6275
UK013	UK013_604	NA	5030	103100	5114	1.70808	NA	NA	40.8163	3.14161	0.0469	6.02454	NA	NA	0.158431	6.79446	0.0245	3.14161	-0.20453	NA	NA	NA	NA	NA	156.033	4.84312	5.20818	149.329	9.43556	9.65559	NA	NA	NA	24.0824	NA		156.033	4.84312	3.1039	5.20818	3.37428
UK013	UK013_236	NA	1330	26470	1444	1.30916	NA	NA	40.568	3.44724	0.0498	7.79294	NA	NA	0.169257	8.52135	0.02465	3.44724	-0.12687	NA	NA	NA	NA	NA	156.977	5.34602	5.68272	158.774	12.5256	12.7121	NA	NA	NA	80.0693	NA		156.977	5.34602	3.40561	5.68272	3.61253
UK013	UK013_52	NA	2380	50000	2120	2.10317	NA	NA	40.4858	3.23438	0.0466	7.61844	NA	NA	0.158703	8.27658	0.0247	3.23438	-0.12121	NA	NA	NA	NA	NA	157.292	5.02586	5.38399	149.567	11.511	11.6925	NA	NA	NA	23.7309	NA		157.292	5.02586	3.19524	5.38399	3.45501
UK013	UK013_569	NA	5530	111500	5320	1.61212	NA	NA	40.4367	3.23383	0.0515	5.9651	NA	NA	0.175603	6.78529	0.02473	3.23383	-0.1434	NA	NA	NA	NA	NA	157.481	5.03096	5.38957	164.27	10.2916	10.5323	NA	NA	NA	26.215	NA		157.481	5.03096	3.19465	5.38957	3.38978
UK013	UK013_552	NA	517	11290	552	2.82497	NA	NA	40.3551	3.27999	0.048	9.22859	NA	NA	0.164	9.79414	0.02478	3.27999	0.42445	NA	NA	NA	NA	NA	157.795	5.11283	5.46742	154.198	14.0125	14.1707	NA	NA	NA	57.0839	NA		157.795	5.11283	3.24017	5.46742	3.46285
UK013	UK013_253	NA	2030	42800	2340	2.41237	NA	NA	40.1606	3.38161	0.0478	7.20114	NA	NA	0.164108	7.95561	0.0249	3.38161	0.078434	NA	NA	NA	NA	NA	158.55	5.29615	5.64238	154.292	11.3883	11.5826	NA	NA	NA	48.3712	NA		158.55	5.29615	3.34037	5.64238	3.57391
UK013	UK013_614	NA	806	15980	794	1.68363	NA	NA	40.016	3.43588	0.0463	8.55596	NA	NA	0.159532	9.22007	0.02499	3.43588	-0.29561	NA	NA	NA	NA	NA	159.116	5.40012	5.74241	150.294	12.8811	13.0451	NA	NA	NA	24.966	NA		159.116	5.40012	3.39383	5.74241	3.65181
UK013	UK013_536	NA	1350	26930	1369	2.78252	NA	NA	39.9042	3.31522	0.0502	7.81539	NA	NA	0.173455	8.48946	0.02506	3.31522	0.41357	NA	NA	NA	NA	NA	159.556	5.22471	5.57965	162.413	12.7424	12.9336	NA	NA	NA	62.2887	NA		159.556	5.22471	3.27453	5.57965	3.49712
UK013	UK013_518	NA	704	14010	676	1.24037	NA	NA	37.037	3.62283	0.0537	9.66325	NA	NA	0.199912	10.32	0.027	3.62283	0.489	NA	NA	NA	NA	NA	171.745	6.13987	6.49098	185.052	17.46	17.6377	NA	NA	NA	8.65887	NA		171.745	6.13987	3.57499	6.49098	3.79814
UK013	UK013_256	NA	890	15640	697	8.40772	NA	NA	32.2893	3.27036	0.0559	8.30455	NA	NA	0.238701	8.92529	0.03097	3.27036	-0.11538	NA	NA	NA	NA	NA	196.616	6.33299	6.77471	217.356	17.4656	17.7028	NA	NA	NA	3.24712	NA		196.616	6.33299	3.22099	6.77471	3.39551
UK013	UK013_358	NA	233	4960	177.8	1.04711	NA	NA	31.5457	4.34781	0.0471	13.3633	NA	NA	0.205864	14.0528	0.0317	4.34781	0.35499	NA	NA	NA	NA	NA	201.179	8.61182	8.95662	190.076	24.3647	24.4987	NA	NA	NA	32.6881	NA		201.179	8.61182	4.28067	8.95662	4.4523
UK013	UK013_199	NA	276	5690	184.4	0.461	NA	NA	26.2467	3.65831	0.049	12.2521	NA	NA	0.257408	12.7866	0.0381	3.65831	-0.4523	NA	NA	NA	NA	NA	241.045	8.65534	9.141	232.576	26.5846	26.7611	NA	NA	NA	58.9215	NA		241.045	8.65534	3.59076	9.141	3.8166
UK013	UK013_427	NA	460	8490	309.6	0.634426	NA	NA	25.8398	3.50008	0.0572	9.12419	NA	NA	0.305217	9.77248	0.0387	3.50008	0.36416	NA	NA	NA	NA	NA	244.77	8.40654	8.92058	270.467	23.2079	23.4712	NA	NA	NA	1.88666	NA		244.77	8.40654	3.43447	8.92058	3.64621
UK013	UK013_541	NA	1235	23830	776	1.07034	NA	NA	25.1256	3.35493	0.0522	7.81265	NA	NA	0.286454	8.50253	0.0398	3.35493	0.12987	NA	NA	NA	NA	NA	251.593	8.27817	8.82772	255.764	19.2261	19.5136	NA	NA	NA	67.5824	NA		251.593	8.27817	3.2903	8.82772	3.50177
UK013	UK013_39	NA	2530	49900	1245	12.5504	NA	NA	24.2718	3.2813	0.0533	7.10092	NA	NA	0.302779	7.8224	0.0412	3.2813	-0.058336	NA	NA	NA	NA	NA	260.267	8.37003	8.95007	268.568	18.4617	18.7875	NA	NA	NA	42.3947	NA		260.267	8.37003	3.21594	8.95007	3.41885
UK013	UK013_275	NA	426	7530	245.3	1.61594	NA	NA	24.2718	3.50607	0.0552	10.1732	NA	NA	0.313572	10.7604	0.0412	3.50607	0.07643	NA	NA	NA	NA	NA	260.267	8.94338	9.48844	276.946	26.0879	26.3322	NA	NA	NA	21.8413	NA		260.267	8.94338	3.43623	9.48844	3.62622
UK013	UK013_306	NA	653	12460	343.1	1.34444	NA	NA	24.0385	3.32624	0.0497	9.84855	NA	NA	0.28507	10.3951	0.0416	3.32624	0.089085	NA	NA	NA	NA	NA	262.743	8.56376	9.1418	254.671	23.4185	23.6534	NA	NA	NA	50.3408	NA		262.743	8.56376	3.25937	9.1418	3.48965
UK013	UK013_277	NA	690	12500	394.6	1.41586	NA	NA	23.5294	3.22032	0.0539	9.3165	NA	NA	0.315849	9.85737	0.0425	3.22032	0.02606	NA	NA	NA	NA	NA	268.311	8.46313	9.07129	278.704	24.0295	24.2974	NA	NA	NA	41.2527	NA		268.311	8.46313	3.15423	9.07129	3.36752
UK013	UK013_468	NA	744	12860	424	2.03553	NA	NA	23.4742	3.31176	0.0574	8.71031	NA	NA	0.33715	9.31865	0.0426	3.31176	0.41633	NA	NA	NA	NA	NA	268.929	8.72306	9.31685	295.01	23.8619	24.1594	NA	NA	NA	1.78409	NA		268.929	8.72306	3.24363	9.31685	3.47324
UK013	UK013_497	NA	873	17780	555	1.15866	NA	NA	23.4687	3.19433	0.0523	8.09131	NA	NA	0.307266	8.69903	0.04261	3.19433	0.24065	NA	NA	NA	NA	NA	268.991	8.41566	9.02995	272.06	20.764	21.0608	NA	NA	NA	76.4249	NA		268.991	8.41566	3.1286	9.02995	3.35436
UK013	UK013_348	NA	656	12500	324.4	2.07949	NA	NA	23.3645	3.53153	0.0573	7.87496	NA	NA	0.338142	8.63056	0.0428	3.53153	0.24121	NA	NA	NA	NA	NA	270.165	9.34382	9.90533	295.763	22.148	22.4696	NA	NA	NA	2.05068	NA		270.165	9.34382	3.45856	9.90533	3.6411
UK013	UK013_430	NA	867	17000	563	1.08897	NA	NA	23.3645	3.21733	0.0532	8.29152	NA	NA	0.313947	8.89385	0.0428	3.21733	0.074042	NA	NA	NA	NA	NA	270.165	8.5125	9.12531	277.236	21.5806	21.8758	NA	NA	NA	53.2655	NA		270.165	8.5125	3.15085	9.12531	3.36762
UK013	UK013_161	NA	2550	50800	1209	1.85429	NA	NA	23.2019	3.17454	0.0483	6.88122	NA	NA	0.287029	7.57819	0.0431	3.17454	-0.11993	NA	NA	NA	NA	NA	272.02	8.45572	9.08039	256.218	17.1622	17.4847	NA	NA	NA	11.2755	NA		272.02	8.45572	3.10849	9.08039	3.38226
UK013	UK013_393	NA	644	11950	364.3	1.75228	NA	NA	22.8833	3.2969	0.0545	9.44348	NA	NA	0.328382	10.0024	0.0437	3.2969	0.1582	NA	NA	NA	NA	NA	275.727	8.89876	9.50981	288.33	25.112	25.3839	NA	NA	NA	32.1243	NA		275.727	8.89876	3.22739	9.50981	3.43849
UK013	UK013_528	NA	761	13950	409	1.47653	NA	NA	22.8833	3.2511	0.0565	8.59083	NA	NA	0.340433	9.18542	0.0437	3.2511	-0.19324	NA	NA	NA	NA	NA	275.727	8.77514	9.39424	297.5	23.6916	23.9955	NA	NA	NA	10.6848	NA		275.727	8.77514	3.18255	9.39424	3.36448
UK013	UK013_491	NA	680	13620	419.2	2.5314	NA	NA	22.8311	3.50922	0.0522	8.5327	NA	NA	0.315243	9.22614	0.0438	3.50922	-0.23825	NA	NA	NA	NA	NA	276.344	9.49262	10.0701	278.237	22.4575	22.743	NA	NA	NA	88.5959	NA		276.344	9.49262	3.43507	10.0701	3.63902
UK013	UK013_184	NA	407	7860	200	1.15875	NA	NA	22.779	3.39475	0.0477	9.99317	NA	NA	0.288725	10.554	0.0439	3.39475	-0.13723	NA	NA	NA	NA	NA	276.962	9.20305	9.80018	257.555	24.0134	24.2471	NA	NA	NA	14.583	NA		276.962	9.20305	3.32286	9.80018	3.57908
UK013	UK013_594	NA	820	16810	457	1.27298	NA	NA	22.7428	3.19044	0.0471	9.8502	NA	NA	0.285548	10.354	0.04397	3.19044	0.16431	NA	NA	NA	NA	NA	277.394	8.66238	9.29617	255.049	23.3564	23.5925	NA	NA	NA	5.52651	NA		277.394	8.66238	3.12277	9.29617	3.37269
UK013	UK013_169	NA	1085	19820	476.4	1.40531	NA	NA	22.7273	3.39305	0.0527	7.89948	NA	NA	0.319716	8.59736	0.044	3.39305	0.069166	NA	NA	NA	NA	NA	277.579	9.21852	9.81724	281.684	21.1515	21.461	NA	NA	NA	71.5343	NA		277.579	9.21852	3.32104	9.81724	3.52939
UK013	UK013_498	NA	310	6100	184.8	1.11797	NA	NA	22.7273	3.44758	0.0541	10.5165	NA	NA	0.32821	11.0672	0.044	3.44758	-0.4315	NA	NA	NA	NA	NA	277.579	9.36666	9.95647	288.198	27.7754	28.0214	NA	NA	NA	52.0204	NA		277.579	9.36666	3.37441	9.95647	3.56189
UK013	UK013_362	NA	391	8220	212.7	1.85279	NA	NA	22.6757	3.89727	0.0507	11.0067	NA	NA	0.308282	11.6764	0.0441	3.89727	0.49107	NA	NA	NA	NA	NA	278.197	10.6115	11.1378	272.848	27.9443	28.1667	NA	NA	NA	66.1911	NA		278.197	10.6115	3.81438	11.1378	3.99942
UK013	UK013_492	NA	512	9780	297.9	1.47915	NA	NA	22.6244	3.75368	0.0578	9.63467	NA	NA	0.35225	10.3401	0.0442	3.75368	0.051933	NA	NA	NA	NA	NA	278.814	10.2427	10.7893	306.412	27.356	27.6334	NA	NA	NA	5.71115	NA		278.814	10.2427	3.67367	10.7893	3.82965
UK013	UK013_583	NA	1188	23820	628	13.8938	NA	NA	22.4719	3.33421	0.0491	7.90787	NA	NA	0.301261	8.58204	0.0445	3.33421	-0.16169	NA	NA	NA	NA	NA	280.666	9.15722	9.77246	267.385	20.177	20.4732	NA	NA	NA	25.5693	NA		280.666	9.15722	3.26267	9.77246	3.5166
UK013	UK013_629	NA	870	16600	475	1.44289	NA	NA	22.4719	3.33421	0.0478	9.60318	NA	NA	0.293285	10.1655	0.0445	3.33421	0.094268	NA	NA	NA	NA	NA	280.666	9.15722	9.77246	261.141	23.4117	23.6572	NA	NA	NA	10.565	NA		280.666	9.15722	3.26267	9.77246	3.50892
UK013	UK013_332	NA	847	16980	403	1.92363	NA	NA	22.3214	3.28306	0.0528	8.10055	NA	NA	0.326147	8.74056	0.0448	3.28306	0.0074602	NA	NA	NA	NA	NA	282.517	9.0749	9.70313	286.62	21.8302	22.1393	NA	NA	NA	72.8186	NA		282.517	9.0749	3.21216	9.70313	3.42732
UK013	UK013_331	NA	433	8420	198.2	1.37735	NA	NA	22.2717	3.54421	0.0535	9.1533	NA	NA	0.331208	9.81552	0.0449	3.54421	-0.04929	NA	NA	NA	NA	NA	283.134	9.81769	10.4036	290.488	24.8019	25.0808	NA	NA	NA	58.8521	NA		283.134	9.81769	3.46751	10.4036	3.66053
UK013	UK013_418	NA	606	10830	339	1.74742	NA	NA	22.2222	3.79666	0.0586	9.66217	NA	NA	0.36359	10.3813	0.045	3.79666	-0.47423	NA	NA	NA	NA	NA	283.751	10.5394	11.0895	314.891	28.1139	28.3967	NA	NA	NA	7.27346	NA		283.751	10.5394	3.71432	11.0895	3.82035
UK013	UK013_403	NA	1530	30700	930	2.33668	NA	NA	22.1729	3.37511	0.0511	7.93897	NA	NA	0.31776	8.62662	0.0451	3.37511	-0.02821	NA	NA	NA	NA	NA	284.368	9.38912	10.0052	280.178	21.125	21.4319	NA	NA	NA	71.9354	NA		284.368	9.38912	3.30175	10.0052	3.52737
UK013	UK013_537	NA	1668	31160	890	3.63859	NA	NA	22.1729	3.23623	0.0521	6.92883	NA	NA	0.323978	7.64735	0.0451	3.23623	0.2382	NA	NA	NA	NA	NA	284.368	9.00279	9.6436	284.958	19.0032	19.3539	NA	NA	NA	95.0459	NA		284.368	9.00279	3.16589	9.6436	3.39045
UK013	UK013_368	NA	1081	19800	508	0.996078	NA	NA	22.0264	3.0634	0.0579	7.8293	NA	NA	0.36244	8.40728	0.0454	3.0634	-0.12017	NA	NA	NA	NA	NA	286.218	8.57622	9.25488	314.035	22.7131	23.0605	NA	NA	NA	2.89405	NA		286.218	8.57622	2.99639	9.25488	3.18744
UK013	UK013_506	NA	568	10920	314.8	2.18157	NA	NA	21.978	3.65156	0.0557	10.3858	NA	NA	0.349436	11.0091	0.0455	3.65156	0.31203	NA	NA	NA	NA	NA	286.835	10.2443	10.8212	304.297	28.9543	29.2135	NA	NA	NA	20.8332	NA		286.835	10.2443	3.57152	10.8212	3.76944
UK013	UK013_225	NA	512	9880	285.4	1.83892	NA	NA	21.9298	3.64895	0.0546	9.56432	NA	NA	0.343288	10.2368	0.0456	3.64895	0.31495	NA	NA	NA	NA	NA	287.451	10.2586	10.837	299.66	26.5693	26.8442	NA	NA	NA	33.6874	NA		287.451	10.2586	3.5688	10.837	3.76552
UK013	UK013_551	NA	540	11430	308.7	1.69243	NA	NA	21.8341	3.46854	0.0493	9.76875	NA	NA	0.311325	10.3663	0.0458	3.46854	0.044012	NA	NA	NA	NA	NA	288.684	9.79225	10.4016	275.207	24.9944	25.2465	NA	NA	NA	30.5443	NA		288.684	9.79225	3.39203	10.4016	3.62409
UK013	UK013_259	NA	1495	26640	809	1.1793	NA	NA	21.8245	3.16161	0.0551	7.26076	NA	NA	0.348103	7.91924	0.04582	3.16161	0.33494	NA	NA	NA	NA	NA	288.808	8.92946	9.59435	303.293	20.7663	21.1239	NA	NA	NA	14.3244	NA		288.808	8.92946	3.09184	9.59435	3.31498
UK013	UK013_634	NA	730	14160	398	1.17197	NA	NA	21.7865	3.27015	0.0491	8.82594	NA	NA	0.310739	9.41229	0.0459	3.27015	0.37556	NA	NA	NA	NA	NA	289.301	9.25141	9.89678	274.753	22.6609	22.9378	NA	NA	NA	16.3226	NA		289.301	9.25141	3.19786	9.89678	3.4241
UK013	UK013_431	NA	1042	21180	643.3	1.254	NA	NA	21.7391	3.22735	0.0522	8.08729	NA	NA	0.331077	8.70747	0.046	3.22735	0.57628	NA	NA	NA	NA	NA	289.917	9.14937	9.80408	290.388	21.9946	22.3084	NA	NA	NA	95.8976	NA		289.917	9.14937	3.15586	9.80408	3.38221
UK013	UK013_76	NA	1063	20210	473	1.81923	NA	NA	21.645	3.35834	0.0539	7.5673	NA	NA	0.343346	8.27904	0.0462	3.35834	0.28221	NA	NA	NA	NA	NA	291.149	9.56028	10.1937	299.704	21.4891	21.828	NA	NA	NA	41.4836	NA		291.149	9.56028	3.28363	10.1937	3.49353
UK013	UK013_144	NA	768	14590	325	1.54028	NA	NA	21.645	3.18724	0.0536	9.7288	NA	NA	0.341435	10.2376	0.0462	3.18724	-0.60491	NA	NA	NA	NA	NA	291.149	9.07321	9.73836	298.259	26.4645	26.7382	NA	NA	NA	66.4896	NA		291.149	9.07321	3.11634	9.73836	3.32762
UK013	UK013_126	NA	574	11100	249	1.3841	NA	NA	21.5983	3.63113	0.0516	9.05219	NA	NA	0.329406	9.75332	0.0463	3.63113	-0.010885	NA	NA	NA	NA	NA	291.766	10.3582	10.9479	289.113	24.5438	24.8233	NA	NA	NA	84.256	NA		291.766	10.3582	3.55019	10.9479	3.75758
UK013	UK013_616	NA	473	9240	255.3	1.15312	NA	NA	21.5983	3.96011	0.0466	9.38859	NA	NA	0.297487	10.1896	0.0463	3.96011	-0.17603	NA	NA	NA	NA	NA	291.766	11.2967	11.8397	264.436	23.7264	23.974	NA	NA	NA	4.91938	NA		291.766	11.2967	3.87183	11.8397	4.14617
UK013	UK013_373	NA	1225	22300	589	1.99661	NA	NA	21.5054	3.40338	0.0564	8.7937	NA	NA	0.361604	9.42932	0.0465	3.40338	-0.35996	NA	NA	NA	NA	NA	292.998	9.74861	10.378	313.412	25.4322	25.7419	NA	NA	NA	18.1064	NA		292.998	9.74861	3.3272	10.378	3.49385
UK013	UK013_622	NA	752	13820	377.3	1.2738	NA	NA	21.5054	3.45543	0.0475	8.60737	NA	NA	0.304542	9.27506	0.0465	3.45543	0.19158	NA	NA	NA	NA	NA	292.998	9.8977	10.5182	269.942	21.9889	22.2656	NA	NA	NA	3.70862	NA		292.998	9.8977	3.37808	10.5182	3.62347
UK013	UK013_228	NA	502	10600	296.5	1.70598	NA	NA	21.4592	3.30602	0.0489	9.9209	NA	NA	0.314193	10.4573	0.0466	3.30602	-0.35458	NA	NA	NA	NA	NA	293.614	9.48919	10.1373	277.426	25.3907	25.6424	NA	NA	NA	27.9442	NA		293.614	9.48919	3.23186	10.1373	3.49026
UK013	UK013_47	NA	142	2460	54.5	0.817091	NA	NA	21.4133	5.04763	0.055	19.4996	NA	NA	0.354145	20.1423	0.0467	5.04763	0.35648	NA	NA	NA	NA	NA	294.23	14.5178	14.9512	307.834	53.5373	53.6811	NA	NA	NA	59.0299	NA		294.23	14.5178	4.93418	14.9512	5.08788
UK013	UK013_409	NA	380	7300	217.5	1.50311	NA	NA	21.4133	3.35108	0.0548	11.0143	NA	NA	0.352857	11.5128	0.0467	3.35108	-0.03154	NA	NA	NA	NA	NA	294.23	9.63825	10.2795	306.868	30.4991	30.7488	NA	NA	NA	43.5726	NA		294.23	9.63825	3.27576	10.2795	3.47925
UK013	UK013_44	NA	723	14160	314	1.45911	NA	NA	21.322	3.25915	0.0526	8.32861	NA	NA	0.340142	8.94359	0.0469	3.25915	0.18855	NA	NA	NA	NA	NA	295.461	9.41218	10.0731	297.279	23.0529	23.3648	NA	NA	NA	87.5535	NA		295.461	9.41218	3.18559	10.0731	3.40741
UK013	UK013_441	NA	2231	44190	1334	4.18313	NA	NA	21.322	3.21896	0.0541	6.82455	NA	NA	0.349842	7.5456	0.0469	3.21896	0.19359	NA	NA	NA	NA	NA	295.461	9.29611	9.96468	304.602	19.8595	20.2359	NA	NA	NA	36.7813	NA		295.461	9.29611	3.14631	9.96468	3.35992
UK013	UK013_487	NA	337	6230	179.1	1.53077	NA	NA	21.2766	3.44639	0.056	9.68939	NA	NA	0.3629	10.2841	0.047	3.44639	0.21183	NA	NA	NA	NA	NA	296.077	9.97319	10.6016	314.378	27.8116	28.0967	NA	NA	NA	18.6407	NA		296.077	9.97319	3.36844	10.6016	3.56937
UK013	UK013_402	NA	228	4650	135.5	1.64642	NA	NA	21.1864	3.86063	0.0485	12.8429	NA	NA	0.315635	13.4106	0.0472	3.86063	0.38208	NA	NA	NA	NA	NA	297.308	11.2173	11.784	278.539	32.6798	32.8772	NA	NA	NA	20.9772	NA		297.308	11.2173	3.77296	11.784	3.9603
UK013	UK013_301	NA	1858	36190	875	3.14748	NA	NA	21.1416	3.39059	0.0512	6.79368	NA	NA	0.333912	7.59278	0.0473	3.39059	0.75074	NA	NA	NA	NA	NA	297.924	9.87151	10.5135	292.548	19.3014	19.6627	NA	NA	NA	42.5949	NA		297.924	9.87151	3.31344	10.5135	3.51335
UK013	UK013_102	NA	383	7360	165	1.78959	NA	NA	21.097	3.49211	0.0554	10.1335	NA	NA	0.362067	10.7183	0.0474	3.49211	-0.21097	NA	NA	NA	NA	NA	298.539	10.1876	10.8133	313.757	28.9377	29.2108	NA	NA	NA	35.3593	NA		298.539	10.1876	3.41248	10.8133	3.59386
UK013	UK013_109	NA	466	8920	198.2	1.4147	NA	NA	21.097	3.49211	0.0564	9.53636	NA	NA	0.368603	10.1556	0.0474	3.49211	-0.11792	NA	NA	NA	NA	NA	298.539	10.1876	10.8133	318.617	27.7796	28.0716	NA	NA	NA	19.3913	NA		298.539	10.1876	3.41248	10.8133	3.58757
UK013	UK013_230	NA	218	4360	121.1	1.43144	NA	NA	21.0526	4.12761	0.051	13.0379	NA	NA	0.334014	13.6756	0.0475	4.12761	-0.19349	NA	NA	NA	NA	NA	299.155	12.0658	12.6007	292.626	34.7818	34.9839	NA	NA	NA	73.6831	NA		299.155	12.0658	4.03331	12.6007	4.22597
UK013	UK013_445	NA	333	7180	212.5	1.13333	NA	NA	21.0526	3.78594	0.0511	11.0241	NA	NA	0.334669	11.6561	0.0475	3.78594	0.13402	NA	NA	NA	NA	NA	299.155	11.0671	11.6479	293.124	29.6858	29.923	NA	NA	NA	68.9405	NA		299.155	11.0671	3.69945	11.6479	3.90042
UK013	UK013_166	NA	715	13550	295	1.20902	NA	NA	21.0084	3.48826	0.048	9.08324	NA	NA	0.315028	9.73002	0.0476	3.48826	-0.33157	NA	NA	NA	NA	NA	299.77	10.2174	10.8463	278.071	23.6721	23.9429	NA	NA	NA	12.8359	NA		299.77	10.2174	3.4084	10.8463	3.67853
UK013	UK013_585	NA	1278	24810	617	1.53102	NA	NA	21.0084	3.21274	0.0508	7.48265	NA	NA	0.333405	8.1432	0.0476	3.21274	0.12408	NA	NA	NA	NA	NA	299.77	9.41034	10.0897	292.162	20.6774	21.0143	NA	NA	NA	48.0474	NA		299.77	9.41034	3.13919	10.0897	3.37774
UK013	UK013_607	NA	338	6510	168.1	0.872793	NA	NA	20.9644	3.91095	0.0498	10.8077	NA	NA	0.327528	11.4935	0.0477	3.91095	0.10877	NA	NA	NA	NA	NA	300.385	11.4784	12.0438	287.677	28.8009	29.0374	NA	NA	NA	39.1596	NA		300.385	11.4784	3.82123	12.0438	4.02819
UK013	UK013_520	NA	1570	30100	817	0.775878	NA	NA	20.9205	3.21101	0.0571	7.25137	NA	NA	0.376327	7.93051	0.0478	3.21101	0.38003	NA	NA	NA	NA	NA	301.001	9.443	10.1254	324.332	22.0213	22.3995	NA	NA	NA	2.36324	NA		301.001	9.443	3.1372	10.1254	3.35885
UK013	UK013_472	NA	777	13320	396.6	3.87683	NA	NA	20.8333	3.59073	0.0589	9.14045	NA	NA	0.389814	9.82045	0.048	3.59073	0.084214	NA	NA	NA	NA	NA	302.231	10.6019	11.2187	334.234	27.9751	28.2894	NA	NA	NA	2.96658	NA		302.231	10.6019	3.50786	11.2187	3.67356
UK013	UK013_191	NA	702	13310	333	1.0918	NA	NA	20.7039	3.584	0.0527	8.10188	NA	NA	0.350961	8.85921	0.0483	3.584	-0.022883	NA	NA	NA	NA	NA	304.076	10.6451	11.2667	305.444	23.3732	23.6954	NA	NA	NA	91.5929	NA		304.076	10.6451	3.50079	11.2667	3.70227
UK013	UK013_66	NA	717	13900	300.7	2.09839	NA	NA	20.6612	3.63919	0.0479	8.62682	NA	NA	0.319655	9.363	0.0484	3.63919	0.19099	NA	NA	NA	NA	NA	304.691	10.8303	11.4443	281.638	23.0325	23.3169	NA	NA	NA	4.78411	NA		304.691	10.8303	3.55453	11.4443	3.7937
UK013	UK013_284	NA	820	15720	421	1.14714	NA	NA	20.6186	3.63678	0.0548	8.80679	NA	NA	0.366457	9.52815	0.0485	3.63678	0.34795	NA	NA	NA	NA	NA	305.306	10.8445	11.46	317.025	25.9514	26.261	NA	NA	NA	33.9236	NA		305.306	10.8445	3.55201	11.46	3.74919
UK013	UK013_83	NA	669	12680	271.7	2.24545	NA	NA	20.5339	3.5752	0.0569	8.77241	NA	NA	0.38207	9.47297	0.0487	3.5752	0.25288	NA	NA	NA	NA	NA	306.535	10.7028	11.3308	328.56	26.5967	26.9177	NA	NA	NA	9.37357	NA		306.535	10.7028	3.49153	11.3308	3.68082
UK013	UK013_593	NA	145	2680	63.5	1.37446	NA	NA	20.5339	3.69079	0.049	15.2303	NA	NA	0.329023	15.6712	0.0487	3.69079	0.38582	NA	NA	NA	NA	NA	306.535	11.0488	11.6582	288.82	39.4133	39.5879	NA	NA	NA	32.8227	NA		306.535	11.0488	3.60442	11.6582	3.79598
UK013	UK013_609	NA	281	4840	120.2	1.37686	NA	NA	20.4082	3.86852	0.058	11.2027	NA	NA	0.391855	11.8518	0.049	3.86852	-0.055514	NA	NA	NA	NA	NA	308.379	11.6489	12.235	335.724	33.8928	34.1548	NA	NA	NA	13.7425	NA		308.379	11.6489	3.77745	12.235	3.92736
UK013	UK013_321	NA	713	12750	278	1.76508	NA	NA	20.284	3.50874	0.0533	8.59052	NA	NA	0.362306	9.27946	0.0493	3.50874	0.45734	NA	NA	NA	NA	NA	310.223	10.6272	11.2739	313.935	25.0635	25.3786	NA	NA	NA	73.965	NA		310.223	10.6272	3.42566	11.2739	3.63494
UK013	UK013_74	NA	459	8670	189	1.94845	NA	NA	20.202	3.61342	0.0494	9.14511	NA	NA	0.337158	9.8331	0.0495	3.61342	0.12312	NA	NA	NA	NA	NA	311.451	10.9865	11.618	295.016	25.1803	25.4624	NA	NA	NA	20.6813	NA		311.451	10.9865	3.52753	11.618	3.75591
UK013	UK013_397	NA	1020	19450	514	1.37433	NA	NA	19.8807	3.44037	0.0506	8.8272	NA	NA	0.350929	9.47395	0.0503	3.44037	0.1504	NA	NA	NA	NA	NA	316.363	10.6213	11.2929	305.42	24.994	25.2955	NA	NA	NA	39.1319	NA		316.363	10.6213	3.35732	11.2929	3.58358
UK013	UK013_19	NA	173	3140	63.6	1.5	NA	NA	19.7628	4.35322	0.055	14.0507	NA	NA	0.38372	14.7096	0.0506	4.35322	0.3683	NA	NA	NA	NA	NA	318.204	13.5158	14.0557	329.772	41.4418	41.6501	NA	NA	NA	55.0736	NA		318.204	13.5158	4.24753	14.0557	4.41993
UK013	UK013_639	NA	206	4130	108.1	1.25991	NA	NA	19.7239	4.64178	0.048	13.5439	NA	NA	0.335545	14.3172	0.0507	4.64178	0.26817	NA	NA	NA	NA	NA	318.818	14.4389	14.9473	293.79	36.5399	36.7337	NA	NA	NA	15.3882	NA		318.818	14.4389	4.52887	14.9473	4.70968
UK013	UK013_455	NA	2221	40030	1060	13.8562	NA	NA	18.6567	3.30787	0.0552	6.60974	NA	NA	0.407948	7.39126	0.0536	3.30787	0.33134	NA	NA	NA	NA	NA	336.586	10.8482	11.5883	347.397	21.7487	22.1781	NA	NA	NA	30.1581	NA		336.586	10.8482	3.223	11.5883	3.43319
UK013	UK013_386	NA	567	10920	250.4	1.17724	NA	NA	17.9533	3.18554	0.0515	9.12081	NA	NA	0.395516	9.6611	0.0557	3.18554	0.33592	NA	NA	NA	NA	NA	349.422	10.8347	11.6298	338.391	27.8096	28.1323	NA	NA	NA	39.7841	NA		349.422	10.8347	3.10075	11.6298	3.33097
UK013	UK013_103	NA	769	13720	254.2	1.39211	NA	NA	17.8571	3.63211	0.0595	8.11016	NA	NA	0.459416	8.88633	0.056	3.63211	0.15288	NA	NA	NA	NA	NA	351.253	12.4166	13.1231	383.852	28.4114	28.8008	NA	NA	NA	2.75016	NA		351.253	12.4166	3.53493	13.1231	3.69789
UK013	UK013_467	NA	2050	35940	907	16.8587	NA	NA	17.7305	3.27921	0.0559	7.224	NA	NA	0.434703	7.93344	0.0564	3.27921	-0.070687	NA	NA	NA	NA	NA	353.695	11.286	12.069	366.51	24.4121	24.8311	NA	NA	NA	35.5123	NA		353.695	11.286	3.19087	12.069	3.38888
UK013	UK013_15	NA	1140	19850	353.6	1.58281	NA	NA	17.6367	3.35117	0.058	8.91125	NA	NA	0.453432	9.52054	0.0567	3.35117	-0.13763	NA	NA	NA	NA	NA	355.525	11.5917	12.3629	379.68	30.1673	30.5278	NA	NA	NA	15.5958	NA		355.525	11.5917	3.26043	12.3629	3.4407
UK013	UK013_245	NA	588	11010	262.5	1.39183	NA	NA	17.5439	3.51735	0.0514	10.5009	NA	NA	0.403961	11.0744	0.057	3.51735	-0.17991	NA	NA	NA	NA	NA	357.355	12.2274	12.968	344.517	32.3653	32.6516	NA	NA	NA	48.09	NA		357.355	12.2274	3.42164	12.968	3.65071
UK013	UK013_493	NA	673	13210	315	15.1224	NA	NA	17.3913	4.26821	0.0515	9.26108	NA	NA	0.408297	10.1973	0.0575	4.26821	-0.10908	NA	NA	NA	NA	NA	360.404	14.9607	15.5818	347.648	30.0279	30.3409	NA	NA	NA	46.4028	NA		360.404	14.9607	4.1511	15.5818	4.35819
UK013	UK013_25	NA	2890	53400	948	34.8914	NA	NA	17.3611	3.17375	0.0554	6.86325	NA	NA	0.439981	7.56154	0.0576	3.17375	-0.39916	NA	NA	NA	NA	NA	361.013	11.1427	11.9663	370.239	23.4636	23.9065	NA	NA	NA	53.5695	NA		361.013	11.1427	3.08652	11.9663	3.29298
UK013	UK013_3	NA	1194	21440	374	1.57275	NA	NA	17.301	3.37739	0.0551	7.83224	NA	NA	0.439117	8.52941	0.0578	3.37739	0.33197	NA	NA	NA	NA	NA	362.232	11.8966	12.6763	369.63	26.4321	26.825	NA	NA	NA	55.7183	NA		362.232	11.8966	3.28426	12.6763	3.4954
UK013	UK013_150	NA	325	6400	111.6	1.15052	NA	NA	17.2712	3.5478	0.051	12.2342	NA	NA	0.407146	12.7383	0.0579	3.5478	-0.18244	NA	NA	NA	NA	NA	362.842	12.5173	13.2629	346.818	37.441	37.6917	NA	NA	NA	43.8104	NA		362.842	12.5173	3.4498	13.2629	3.67833
UK013	UK013_282	NA	906	16350	374.9	1.89439	NA	NA	17.2117	3.41392	0.0564	8.64888	NA	NA	0.451811	9.29828	0.0581	3.41392	0.12776	NA	NA	NA	NA	NA	364.06	12.0843	12.8599	378.547	29.39	29.7581	NA	NA	NA	34.1841	NA		364.06	12.0843	3.31931	12.8599	3.51736
UK013	UK013_443	NA	684	12590	298.8	0.734152	NA	NA	17.0358	4.22425	0.0577	8.07897	NA	NA	0.466998	9.11669	0.0587	4.22425	0.11049	NA	NA	NA	NA	NA	367.715	15.0985	15.7382	389.113	29.4764	29.8604	NA	NA	NA	17.8577	NA		367.715	15.0985	4.10604	15.7382	4.237
UK013	UK013_566	NA	1430	24860	510	1.57895	NA	NA	17.0358	3.57977	0.0586	7.5094	NA	NA	0.474282	8.319	0.0587	3.57977	0.3302	NA	NA	NA	NA	NA	367.715	12.7949	13.5438	394.143	27.1807	27.6053	NA	NA	NA	4.38663	NA		367.715	12.7949	3.47959	13.5438	3.66582
UK013	UK013_523	NA	322	6500	136	1.66259	NA	NA	16.9205	4.03633	0.0549	11.1952	NA	NA	0.447364	11.9006	0.0591	4.03633	0.20892	NA	NA	NA	NA	NA	370.15	14.5197	15.1921	375.432	37.3661	37.6526	NA	NA	NA	77.655	NA		370.15	14.5197	3.92264	15.1921	4.10023
UK013	UK013_452	NA	996	20210	482	23.7673	NA	NA	16.8919	3.44004	0.0499	8.26806	NA	NA	0.407309	8.95515	0.0592	3.44004	0.35514	NA	NA	NA	NA	NA	370.758	12.3944	13.1782	346.935	26.3229	26.6782	NA	NA	NA	5.21509	NA		370.758	12.3944	3.34299	13.1782	3.56992
UK013	UK013_522	NA	1327	26700	580	0.714286	NA	NA	16.8067	3.39573	0.0512	7.29272	NA	NA	0.420038	8.04455	0.0595	3.39573	0.20192	NA	NA	NA	NA	NA	372.584	12.2933	13.0905	356.078	24.1659	24.5693	NA	NA	NA	18.0557	NA		372.584	12.2933	3.29947	13.0905	3.5373
UK013	UK013_60	NA	2130	40300	710	7.48156	NA	NA	16.4474	3.15625	0.0502	6.93315	NA	NA	0.420832	7.61777	0.0608	3.15625	0.34055	NA	NA	NA	NA	NA	380.489	11.6616	12.5328	356.646	22.9138	23.34	NA	NA	NA	2.7805	NA		380.489	11.6616	3.06491	12.5328	3.31484
UK013	UK013_80	NA	331	6250	109.1	0.614302	NA	NA	16.4204	3.63153	0.0544	10.439	NA	NA	0.456791	11.0526	0.0609	3.63153	0.0056889	NA	NA	NA	NA	NA	381.097	13.4385	14.2034	382.024	35.2038	35.5165	NA	NA	NA	96.0679	NA		381.097	13.4385	3.52628	14.2034	3.72585
UK013	UK013_325	NA	1690	29400	515	1.85921	NA	NA	16.3934	3.20991	0.0568	7.34748	NA	NA	0.477727	8.01804	0.061	3.20991	0.181	NA	NA	NA	NA	NA	381.704	11.8967	12.757	396.512	26.3258	26.7682	NA	NA	NA	27.2744	NA		381.704	11.8967	3.11673	12.757	3.32731
UK013	UK013_414	NA	3600	67500	1518	2.024	NA	NA	16.3132	3.20792	0.0557	6.58243	NA	NA	0.470779	7.32251	0.0613	3.20792	-0.15383	NA	NA	NA	NA	NA	383.527	11.9444	12.8091	391.727	23.8034	24.2822	NA	NA	NA	56.2088	NA		383.527	11.9444	3.11436	12.8091	3.3233
UK013	UK013_249	NA	1750	31900	716	3.29044	NA	NA	16.2602	3.33541	0.0542	7.01453	NA	NA	0.459595	7.76715	0.0615	3.33541	0.58571	NA	NA	NA	NA	NA	384.741	12.4573	13.2937	383.977	24.8383	25.2828	NA	NA	NA	93.9719	NA		384.741	12.4573	3.23783	13.2937	3.45478
UK013	UK013_363	NA	724	12890	242.9	1.70217	NA	NA	16.1551	3.80227	0.0605	8.10266	NA	NA	0.516354	8.95044	0.0619	3.80227	0.44151	NA	NA	NA	NA	NA	387.17	14.2879	15.0315	422.713	30.9568	31.375	NA	NA	NA	1.18798	NA		387.17	14.2879	3.69034	15.0315	3.88154
UK013	UK013_337	NA	1040	18240	310	1.15672	NA	NA	16.1031	3.36494	0.0581	7.39505	NA	NA	0.497472	8.12463	0.0621	3.36494	0.57494	NA	NA	NA	NA	NA	388.384	12.683	13.5201	409.99	27.4125	27.8613	NA	NA	NA	5.93215	NA		388.384	12.683	3.26559	13.5201	3.49708
UK013	UK013_376	NA	230	3660	72.3	0.747673	NA	NA	16.1031	4.69754	0.065	12.022	NA	NA	0.556553	12.9072	0.0621	4.69754	-0.072066	NA	NA	NA	NA	NA	388.384	17.7058	18.3148	449.28	46.8936	47.1996	NA	NA	NA	2.01621	NA		388.384	17.7058	4.55885	18.3148	4.6188
UK013	UK013_329	NA	784	14950	260	1.8705	NA	NA	16	3.47522	0.0517	9.55278	NA	NA	0.445525	10.1653	0.0625	3.47522	-0.03567	NA	NA	NA	NA	NA	390.811	13.1781	13.9951	374.141	31.8227	32.1566	NA	NA	NA	33.6115	NA		390.811	13.1781	3.37198	13.9951	3.60531
UK013	UK013_14	NA	693	13030	209.4	0.872864	NA	NA	15.8479	3.82365	0.0512	8.919	NA	NA	0.445452	9.70407	0.0631	3.82365	0.22384	NA	NA	NA	NA	NA	394.451	14.6303	15.3834	374.089	30.3746	30.7241	NA	NA	NA	18.0105	NA		394.451	14.6303	3.70903	15.3834	3.92572
UK013	UK013_517	NA	1310	24640	506	2.14862	NA	NA	15.8479	3.14523	0.0575	8.07737	NA	NA	0.500263	8.66812	0.0631	3.14523	-0.13116	NA	NA	NA	NA	NA	394.451	12.0345	12.9396	411.88	29.3567	29.7794	NA	NA	NA	29.5788	NA		394.451	12.0345	3.05094	12.9396	3.25574
UK013	UK013_488	NA	1580	27170	577	1.55651	NA	NA	15.748	3.12076	0.061	8.26331	NA	NA	0.534078	8.83297	0.0635	3.12076	0.06758	NA	NA	NA	NA	NA	396.876	12.012	12.9292	434.513	31.2343	31.6675	NA	NA	NA	2.32564	NA		396.876	12.012	3.02664	12.9292	3.22543
UK013	UK013_119	NA	1688	30770	509	8.82149	NA	NA	15.7233	3.22134	0.0555	6.96314	NA	NA	0.486689	7.67218	0.0636	3.22134	-0.015118	NA	NA	NA	NA	NA	397.482	12.4175	13.3093	402.652	25.5077	25.9755	NA	NA	NA	71.7524	NA		397.482	12.4175	3.12404	13.3093	3.33995
UK013	UK013_50	NA	1990	37800	616	43.6879	NA	NA	15.6986	3.16686	0.0546	6.81256	NA	NA	0.479549	7.51265	0.0637	3.16686	0.4909	NA	NA	NA	NA	NA	398.088	12.2255	13.1329	397.764	24.7294	25.2022	NA	NA	NA	97.5977	NA		398.088	12.2255	3.07107	13.1329	3.29901
UK013	UK013_139	NA	1900	36700	597	4.42878	NA	NA	15.6986	3.31363	0.0538	7.61668	NA	NA	0.472523	8.30626	0.0637	3.31363	0.14994	NA	NA	NA	NA	NA	398.088	12.7922	13.662	392.93	27.0707	27.4949	NA	NA	NA	71.3496	NA		398.088	12.7922	3.2134	13.662	3.43823
UK013	UK013_8	NA	2650	46700	743	2.23123	NA	NA	15.5763	3.09775	0.0552	6.52285	NA	NA	0.488625	7.22105	0.0642	3.09775	-0.16301	NA	NA	NA	NA	NA	401.117	12.047	12.98	403.973	24.0714	24.5692	NA	NA	NA	84.1946	NA		401.117	12.047	3.00335	12.98	3.23057
UK013	UK013_61	NA	2980	53900	879	3.03732	NA	NA	15.361	3.15989	0.0522	6.83968	NA	NA	0.468547	7.53433	0.0651	3.15989	0.13253	NA	NA	NA	NA	NA	406.567	12.4503	13.3784	390.184	24.4131	24.8772	NA	NA	NA	20.3176	NA		406.567	12.4503	3.06231	13.3784	3.31393
UK013	UK013_121	NA	1540	27800	441.6	7.49745	NA	NA	15.2672	3.26638	0.0566	7.27697	NA	NA	0.511163	7.97643	0.0655	3.26638	0.13817	NA	NA	NA	NA	NA	408.987	12.9442	13.8491	419.231	27.4026	27.8679	NA	NA	NA	47.6005	NA		408.987	12.9442	3.16493	13.8491	3.37417
UK013	UK013_71	NA	373	6650	106.6	2.19794	NA	NA	15.1976	3.46904	0.055	12.117	NA	NA	0.498988	12.6038	0.0658	3.46904	-0.24769	NA	NA	NA	NA	NA	410.802	13.8063	14.6653	411.017	42.6262	42.9178	NA	NA	NA	99.2851	NA		410.802	13.8063	3.36082	14.6653	3.56965
UK013	UK013_462	NA	772	14640	310	4.23497	NA	NA	15.1976	3.39531	0.0529	9.29637	NA	NA	0.479935	9.897	0.0658	3.39531	-0.12759	NA	NA	NA	NA	NA	410.802	13.5129	14.3894	398.029	32.6004	32.9611	NA	NA	NA	48.6151	NA		410.802	13.5129	3.2894	14.3894	3.52224
UK013	UK013_571	NA	553	10460	184.2	2.95192	NA	NA	15.1976	3.54773	0.0527	10.4218	NA	NA	0.478121	11.0091	0.0658	3.54773	-0.037564	NA	NA	NA	NA	NA	410.802	14.1195	14.9605	396.783	36.1738	36.4977	NA	NA	NA	47.3428	NA		410.802	14.1195	3.43705	14.9605	3.6597
UK013	UK013_548	NA	1711	31360	598	3.23593	NA	NA	15.1745	3.20656	0.0548	7.31003	NA	NA	0.497929	7.98239	0.0659	3.20656	0.29634	NA	NA	NA	NA	NA	411.407	12.7799	13.7059	410.299	26.9489	27.4058	NA	NA	NA	93.2525	NA		411.407	12.7799	3.10638	13.7059	3.33227
UK013	UK013_475	NA	1490	27100	563	1.71125	NA	NA	15.1057	3.26098	0.0575	7.50541	NA	NA	0.52484	8.18323	0.0662	3.26098	0.065832	NA	NA	NA	NA	NA	413.221	13.0523	13.9677	428.38	28.607	29.0687	NA	NA	NA	32.5096	NA		413.221	13.0523	3.15866	13.9677	3.36142
UK013	UK013_612	NA	457	8910	166.3	1.43362	NA	NA	15.083	3.89368	0.0477	10.2951	NA	NA	0.436047	11.0068	0.0663	3.89368	-0.28073	NA	NA	NA	NA	NA	413.826	15.6068	16.3822	367.461	33.9482	34.2523	NA	NA	NA	2.23816	NA		413.826	15.6068	3.77134	16.3822	4.06736
UK013	UK013_90	NA	790	14430	226.6	2.04513	NA	NA	14.9925	3.49511	0.0561	9.99506	NA	NA	0.515929	10.5885	0.0667	3.49511	-0.4607	NA	NA	NA	NA	NA	416.243	14.0884	14.9523	422.428	36.6071	36.9612	NA	NA	NA	78.314	NA		416.243	14.0884	3.38466	14.9523	3.58071
UK013	UK013_49	NA	1641	28190	435.8	2.19547	NA	NA	14.9477	3.22741	0.0604	6.98078	NA	NA	0.55714	7.69074	0.0669	3.22741	0.040038	NA	NA	NA	NA	NA	417.452	13.046	13.9795	449.663	27.9476	28.4578	NA	NA	NA	3.58278	NA		417.452	13.046	3.12514	13.9795	3.30723
UK013	UK013_265	NA	440	8090	165.8	1.55827	NA	NA	14.771	4.0041	0.0555	10.4147	NA	NA	0.518063	11.1579	0.0677	4.0041	0.24866	NA	NA	NA	NA	NA	422.284	16.3668	17.1368	423.857	38.6826	39.0198	NA	NA	NA	93.4159	NA		422.284	16.3668	3.87578	17.1368	4.05697
UK013	UK013_579	NA	853	14550	251.9	2.6185	NA	NA	14.771	3.64023	0.0584	8.37794	NA	NA	0.545133	9.13461	0.0677	3.64023	0.29898	NA	NA	NA	NA	NA	422.284	14.8794	15.7224	441.804	32.7346	33.1594	NA	NA	NA	22.1044	NA		422.284	14.8794	3.52356	15.7224	3.71096
UK013	UK013_542	NA	2580	46900	868	3.89238	NA	NA	14.5349	3.16591	0.0538	6.90457	NA	NA	0.510355	7.5958	0.0688	3.16591	0.26772	NA	NA	NA	NA	NA	428.922	13.1374	14.1131	418.688	26.067	26.5547	NA	NA	NA	42.6751	NA		428.922	13.1374	3.06289	14.1131	3.3001
UK013	UK013_433	NA	1820	30580	624	1.81924	NA	NA	14.4092	3.14096	0.0619	7.2789	NA	NA	0.592313	7.92767	0.0694	3.14096	-0.23441	NA	NA	NA	NA	NA	432.54	13.1402	14.131	472.344	29.9519	30.4668	NA	NA	NA	2.63383	NA		432.54	13.1402	3.03791	14.131	3.20632
UK013	UK013_618	NA	328	6170	111.5	2.58701	NA	NA	14.3678	3.45727	0.0482	12.7845	NA	NA	0.462549	13.2438	0.0696	3.45727	0.057102	NA	NA	NA	NA	NA	433.745	14.5024	15.4106	386.029	42.5542	42.8179	NA	NA	NA	2.75157	NA		433.745	14.5024	3.34353	15.4106	3.59089
UK013	UK013_196	NA	4690	81900	1409	8.1776	NA	NA	14.3472	3.26383	0.0566	5.97908	NA	NA	0.543939	6.8119	0.0697	3.26383	0.38014	NA	NA	NA	NA	NA	434.348	13.7094	14.6693	441.019	24.3726	24.9383	NA	NA	NA	56.2424	NA		434.348	13.7094	3.15631	14.6693	3.37145
UK013	UK013_207	NA	3000	54400	955	5.25881	NA	NA	14.3062	3.11862	0.0598	6.57374	NA	NA	0.576341	7.27598	0.0699	3.11862	0.4592	NA	NA	NA	NA	NA	435.553	13.1346	14.1387	462.107	27.018	27.5684	NA	NA	NA	2.89404	NA		435.553	13.1346	3.0156	14.1387	3.2444
UK013	UK013_437	NA	1281	22400	451	3.28239	NA	NA	14.2045	3.25879	0.0601	7.82789	NA	NA	0.583376	8.47913	0.0704	3.25879	0.0010023	NA	NA	NA	NA	NA	438.565	13.8166	14.787	466.629	31.7312	32.2086	NA	NA	NA	10.8048	NA		438.565	13.8166	3.15042	14.787	3.33867
UK013	UK013_195	NA	825	14290	235.2	1.55762	NA	NA	14.0449	3.50889	0.0563	8.39603	NA	NA	0.5527	9.09976	0.0712	3.50889	0.22247	NA	NA	NA	NA	NA	443.381	15.0348	15.9497	446.764	32.9014	33.3316	NA	NA	NA	83.7682	NA		443.381	15.0348	3.39095	15.9497	3.59438
UK013	UK013_454	NA	69	1112	22.7	0.861807	NA	NA	14.0449	5.10782	0.062	20.3443	NA	NA	0.608657	20.9757	0.0712	5.10782	0.2396	NA	NA	NA	NA	NA	443.381	21.8859	22.5242	482.713	80.755	80.9555	NA	NA	NA	32.4147	NA		443.381	21.8859	4.93615	22.5242	5.07734
UK013	UK013_511	NA	3023	53400	964	4.99223	NA	NA	13.986	3.43474	0.0605	6.5578	NA	NA	0.596434	7.40285	0.0715	3.43474	-0.028453	NA	NA	NA	NA	NA	445.186	14.775	15.7121	474.968	28.09	28.643	NA	NA	NA	6.58861	NA		445.186	14.775	3.31883	15.7121	3.47874
UK013	UK013_180	NA	1750	28800	427	3.44633	NA	NA	13.6986	3.19188	0.054	7.81622	NA	NA	0.543523	8.44283	0.073	3.19188	0.19245	NA	NA	NA	NA	NA	454.204	13.9987	15.0221	440.745	30.1961	30.6542	NA	NA	NA	37.8669	NA		454.204	13.9987	3.08204	15.0221	3.31957
UK013	UK013_589	NA	2480	44400	713	2.875	NA	NA	13.6612	3.14687	0.0548	6.73151	NA	NA	0.553086	7.43074	0.0732	3.14687	0.066516	NA	NA	NA	NA	NA	455.406	13.8365	14.8762	447.016	26.8758	27.401	NA	NA	NA	56.7074	NA		455.406	13.8365	3.03829	14.8762	3.27834
UK013	UK013_466	NA	1700	31400	612	1.2541	NA	NA	13.6054	3.18934	0.0536	7.65775	NA	NA	0.543192	8.29536	0.0735	3.18934	0.2796	NA	NA	NA	NA	NA	457.208	14.0768	15.1075	440.527	29.6567	30.1226	NA	NA	NA	24.7612	NA		457.208	14.0768	3.07887	15.1075	3.31647
UK013	UK013_213	NA	927	15740	270.5	0.95922	NA	NA	13.587	3.29099	0.0618	8.03825	NA	NA	0.627144	8.68585	0.0736	3.29099	-0.28045	NA	NA	NA	NA	NA	457.808	14.5439	15.5461	494.315	34.0053	34.493	NA	NA	NA	7.49492	NA		457.808	14.5439	3.17685	15.5461	3.34034
UK013	UK013_36	NA	4070	70600	983	0.811056	NA	NA	13.5135	3.28798	0.0614	6.4903	NA	NA	0.626472	7.27563	0.074	3.28798	-0.24847	NA	NA	NA	NA	NA	460.209	14.6041	15.6122	493.896	28.4622	29.0422	NA	NA	NA	5.6893	NA		460.209	14.6041	3.17336	15.6122	3.33092
UK013	UK013_262	NA	1116	18570	344.7	2.58784	NA	NA	13.5135	3.16466	0.0578	8.42333	NA	NA	0.58974	8.9982	0.074	3.16466	0.35998	NA	NA	NA	NA	NA	460.209	14.0564	15.1011	470.702	33.9064	34.3597	NA	NA	NA	50.9743	NA		460.209	14.0564	3.05434	15.1011	3.27956
UK013	UK013_101	NA	817	13720	192.6	2.08667	NA	NA	13.459	3.12317	0.0639	8.63025	NA	NA	0.654623	9.17798	0.0743	3.12317	-0.12736	NA	NA	NA	NA	NA	462.01	13.9245	14.986	511.319	36.8859	37.3601	NA	NA	NA	1.81899	NA		462.01	13.9245	3.01389	14.986	3.19341
UK013	UK013_29	NA	1358	22810	310.7	1.94552	NA	NA	13.4048	3.5355	0.062	7.43868	NA	NA	0.637723	8.23613	0.0746	3.5355	0.12777	NA	NA	NA	NA	NA	463.81	15.822	16.7708	500.895	32.5757	33.0949	NA	NA	NA	3.30043	NA		463.81	15.822	3.41132	16.7708	3.57344
UK013	UK013_394	NA	455	8900	154.6	1.00586	NA	NA	13.3869	3.9288	0.0494	9.10079	NA	NA	0.508802	9.91261	0.0747	3.9288	-0.20318	NA	NA	NA	NA	NA	464.41	17.6041	18.4635	417.643	33.9544	34.329	NA	NA	NA	2.18021	NA		464.41	17.6041	3.79063	18.4635	4.0829
UK013	UK013_533	NA	1490	26180	447	1.70741	NA	NA	13.369	3.39932	0.0588	7.71103	NA	NA	0.606429	8.42706	0.0748	3.39932	-0.046019	NA	NA	NA	NA	NA	465.009	15.2505	16.2375	481.306	32.3126	32.8047	NA	NA	NA	37.2401	NA		465.009	15.2505	3.27961	16.2375	3.46873
UK013	UK013_258	NA	715	12780	234	1.4625	NA	NA	13.3333	3.60221	0.0559	9.01119	NA	NA	0.578062	9.70451	0.075	3.60221	-0.060399	NA	NA	NA	NA	NA	466.209	16.201	17.1378	463.215	36.1108	36.5263	NA	NA	NA	88.2203	NA		466.209	16.201	3.47505	17.1378	3.6803
UK013	UK013_613	NA	2650	43900	718	2.53352	NA	NA	13.3156	3.20435	0.0549	7.02134	NA	NA	0.568478	7.71797	0.0751	3.20435	0.61293	NA	NA	NA	NA	NA	466.809	14.4294	15.4764	457.03	28.4107	28.9257	NA	NA	NA	38.4972	NA		466.809	14.4294	3.09108	15.4764	3.3098
UK013	UK013_398	NA	3020	47690	831	9.44318	NA	NA	13.2802	3.22719	0.0607	6.85944	NA	NA	0.630209	7.58068	0.0753	3.22719	0.081402	NA	NA	NA	NA	NA	468.008	14.5683	15.6109	496.226	29.7649	30.324	NA	NA	NA	8.11023	NA		468.008	14.5683	3.11284	15.6109	3.30247
UK013	UK013_302	NA	1600	27810	417.4	3.00072	NA	NA	13.245	3.15829	0.056	7.75404	NA	NA	0.582957	8.37257	0.0755	3.15829	-0.34517	NA	NA	NA	NA	NA	469.207	14.2925	15.3589	466.36	31.318	31.8011	NA	NA	NA	88.2774	NA		469.207	14.2925	3.04609	15.3589	3.27815
UK013	UK013_356	NA	1190	21300	323	2.19728	NA	NA	13.2275	3.52244	0.0593	7.87007	NA	NA	0.618127	8.62238	0.0756	3.52244	0.26536	NA	NA	NA	NA	NA	469.806	15.96	16.924	488.673	33.4564	33.9433	NA	NA	NA	25.6617	NA		469.806	15.96	3.39715	16.924	3.58803
UK013	UK013_580	NA	1758	31900	502	2.83616	NA	NA	13.21	3.22487	0.0542	7.47432	NA	NA	0.565713	8.14034	0.0757	3.22487	-0.083729	NA	NA	NA	NA	NA	470.405	14.6297	15.6781	455.238	29.8732	30.3605	NA	NA	NA	37.4848	NA		470.405	14.6297	3.11002	15.6781	3.35619
UK013	UK013_471	NA	2160	36930	692	0.82381	NA	NA	13.1234	3.22201	0.0581	7.28806	NA	NA	0.610425	7.96851	0.0762	3.22201	0.36104	NA	NA	NA	NA	NA	473.401	14.7065	15.7622	483.828	30.6783	31.2003	NA	NA	NA	47.146	NA		473.401	14.7065	3.10656	15.7622	3.32506
UK013	UK013_600	NA	1284	23260	365.7	1.40115	NA	NA	13.1062	3.27151	0.0561	7.4348	NA	NA	0.590186	8.12275	0.0763	3.27151	0.11777	NA	NA	NA	NA	NA	474	14.9506	15.9927	470.986	30.62	31.1216	NA	NA	NA	85.2478	NA		474	14.9506	3.15414	15.9927	3.37746
UK013	UK013_226	NA	1108	18900	321.9	1.69778	NA	NA	13.0208	3.54151	0.0611	7.91273	NA	NA	0.646999	8.66912	0.0768	3.54151	0.27538	NA	NA	NA	NA	NA	476.994	16.283	17.2562	506.63	34.5926	35.0907	NA	NA	NA	8.42629	NA		476.994	16.283	3.41367	17.2562	3.59787
UK013	UK013_509	NA	121	1960	33.2	0.94051	NA	NA	13.0208	5.12675	0.061	16.0607	NA	NA	0.64594	16.8591	0.0768	5.12675	0.26725	NA	NA	NA	NA	NA	476.994	23.5716	24.2541	505.977	67.2787	67.5367	NA	NA	NA	37.876	NA		476.994	23.5716	4.9417	24.2541	5.07632
UK013	UK013_43	NA	2550	45900	614.8	1.80293	NA	NA	12.9702	3.19414	0.0578	6.66458	NA	NA	0.614446	7.39048	0.0771	3.19414	0.019861	NA	NA	NA	NA	NA	478.79	14.7391	15.8151	486.36	28.5678	29.1321	NA	NA	NA	63.5606	NA		478.79	14.7391	3.07841	15.8151	3.29252
UK013	UK013_268	NA	698	12810	225.9	160.213	NA	NA	12.9702	3.50371	0.0537	8.32194	NA	NA	0.57086	9.02943	0.0771	3.50371	0.31466	NA	NA	NA	NA	NA	478.79	16.1676	17.1542	458.571	33.3302	33.7728	NA	NA	NA	20.4499	NA		478.79	16.1676	3.37676	17.1542	3.59716
UK013	UK013_45	NA	777	15350	206.1	3.07612	NA	NA	12.9534	3.40634	0.0545	8.96995	NA	NA	0.580116	9.59496	0.0772	3.40634	-0.22102	NA	NA	NA	NA	NA	479.388	15.7372	16.7516	464.536	35.7832	36.2043	NA	NA	NA	47.8911	NA		479.388	15.7372	3.28278	16.7516	3.51744
UK013	UK013_58	NA	4830	86500	1203	2.24022	NA	NA	12.9199	3.40436	0.0526	6.17736	NA	NA	0.561343	7.05333	0.0774	3.40436	0.42903	NA	NA	NA	NA	NA	480.585	15.7659	16.7833	452.4	25.7541	26.3121	NA	NA	NA	1.64049	NA		480.585	15.7659	3.28057	16.7833	3.52201
UK013	UK013_582	NA	930	15980	243.7	1.32518	NA	NA	12.837	3.66883	0.0549	8.30809	NA	NA	0.589673	9.08211	0.0779	3.66883	0.10918	NA	NA	NA	NA	NA	483.576	17.0925	18.0462	470.659	34.2203	34.6695	NA	NA	NA	47.7563	NA		483.576	17.0925	3.53461	18.0462	3.74925
UK013	UK013_387	NA	886	16100	264	1.98496	NA	NA	12.8205	3.46057	0.0539	7.94715	NA	NA	0.579675	8.66792	0.078	3.46057	-0.12734	NA	NA	NA	NA	NA	484.174	16.1414	17.1505	464.253	32.3078	32.7731	NA	NA	NA	29.0368	NA		484.174	16.1414	3.33381	17.1505	3.57621
UK013	UK013_478	NA	1250	20990	382	2.07271	NA	NA	12.8205	3.21216	0.0596	8.25798	NA	NA	0.640977	8.86071	0.078	3.21216	0.11254	NA	NA	NA	NA	NA	484.174	14.9828	16.0647	502.911	35.157	35.6417	NA	NA	NA	30.9589	NA		484.174	14.9828	3.0945	16.0647	3.30265
UK013	UK013_149	NA	5740	101500	1317	7.47022	NA	NA	12.8041	3.33938	0.057	5.8553	NA	NA	0.6138	6.74062	0.0781	3.33938	0.50327	NA	NA	NA	NA	NA	484.772	15.5947	16.6393	485.954	26.0377	26.6547	NA	NA	NA	91.6836	NA		484.772	15.5947	3.21691	16.6393	3.43177
UK013	UK013_98	NA	906	15370	204.1	0.659451	NA	NA	12.6263	3.35834	0.0644	8.44516	NA	NA	0.703254	9.08841	0.0792	3.35834	-0.1142	NA	NA	NA	NA	NA	491.346	15.8879	16.9406	540.733	38.1202	38.6199	NA	NA	NA	2.36179	NA		491.346	15.8879	3.23355	16.9406	3.3908
UK013	UK013_545	NA	1193	22320	362.7	0.704272	NA	NA	12.6103	3.30279	0.0552	7.82972	NA	NA	0.60355	8.49782	0.0793	3.30279	-0.12681	NA	NA	NA	NA	NA	491.943	15.6434	16.7139	479.484	32.4875	32.9741	NA	NA	NA	50.8115	NA		491.943	15.6434	3.17992	16.7139	3.41643
UK013	UK013_190	NA	627	10150	145.3	23.8197	NA	NA	12.5786	3.30133	0.057	10.754	NA	NA	0.624803	11.2494	0.0795	3.30133	-0.17956	NA	NA	NA	NA	NA	493.138	15.673	16.7464	492.853	43.9512	44.3283	NA	NA	NA	99.0786	NA		493.138	15.673	3.17822	16.7464	3.39619
UK013	UK013_176	NA	1920	32590	441	2.1	NA	NA	12.5471	3.226	0.0535	7.34177	NA	NA	0.587913	8.01927	0.0797	3.226	-0.13104	NA	NA	NA	NA	NA	494.332	15.3511	16.4504	469.534	30.1563	30.6631	NA	NA	NA	16.0382	NA		494.332	15.3511	3.10541	16.4504	3.3681
UK013	UK013_10	NA	149	2600	32.83	9.04408	NA	NA	12.4533	4.54679	0.056	16.1459	NA	NA	0.620019	16.7739	0.0803	4.54679	0.32702	NA	NA	NA	NA	NA	497.913	21.7869	22.5859	489.859	65.2748	65.5277	NA	NA	NA	79.2923	NA		497.913	21.7869	4.37565	22.5859	4.53638
UK013	UK013_515	NA	1540	27400	448.3	3.32074	NA	NA	12.3916	3.19855	0.0589	7.40635	NA	NA	0.655375	8.06752	0.0807	3.19855	-0.15746	NA	NA	NA	NA	NA	500.3	15.3972	16.5182	511.781	32.4423	32.981	NA	NA	NA	54.7311	NA		500.3	15.3972	3.07759	16.5182	3.28534
UK013	UK013_420	NA	687	10920	189.1	2.30329	NA	NA	12.3609	3.65923	0.0655	10.0985	NA	NA	0.730619	10.741	0.0809	3.65923	-0.095601	NA	NA	790.438	213.154	213.823	501.493	17.6552	18.6453	556.917	46.0747	46.5081	NA	NA	NA	3.26197	36.5551		501.493	17.6552	3.52053	18.6453	3.66015
UK013	UK013_1	NA	1340	24800	307	2.38354	NA	NA	12.3305	3.26519	0.053	7.81296	NA	NA	0.59265	8.46781	0.0811	3.26519	-0.077249	NA	NA	328.797	177.949	178.878	502.685	15.79	16.8947	472.558	32.0054	32.4881	NA	NA	NA	9.81058	-52.8863		502.685	15.79	3.14114	16.8947	3.40557
UK013	UK013_202	NA	919	17500	260.2	1.76168	NA	NA	12.285	3.39593	0.0574	8.49484	NA	NA	0.644225	9.14848	0.0814	3.39593	0.29689	NA	NA	506.935	187.657	188.487	504.474	16.4784	17.5469	504.919	36.4117	36.8829	NA	NA	NA	97.9847	0.485436		504.474	16.4784	3.26646	17.5469	3.47802
UK013	UK013_243	NA	831	14500	241.9	2.46334	NA	NA	12.2399	3.28595	0.0544	8.51449	NA	NA	0.612805	9.12655	0.0817	3.28595	-0.30415	NA	NA	387.646	192.047	192.893	506.262	15.9991	17.1048	485.328	35.225	35.683	NA	NA	NA	32.5943	-30.5992		506.262	15.9991	3.16024	17.1048	3.41184
UK013	UK013_30	NA	1082	18480	233	2.30465	NA	NA	12.1803	3.21334	0.061	7.23467	NA	NA	0.690517	7.91618	0.0821	3.21334	0.61282	NA	NA	639.234	156.092	157.041	508.645	15.7163	16.8505	533.111	32.8437	33.41	NA	NA	NA	6.68903	20.4289		508.645	15.7163	3.08984	16.8505	3.33
UK013	UK013_500	NA	513	9120	145.5	1.60773	NA	NA	12.0627	3.41075	0.0612	8.83253	NA	NA	0.699531	9.4682	0.0829	3.41075	0.025296	NA	NA	646.271	190.631	191.411	513.409	16.832	17.9142	538.511	39.5909	40.0694	NA	NA	NA	24.2927	20.5582		513.409	16.832	3.27848	17.9142	3.46512
UK013	UK013_477	NA	928	16250	280.7	1.71472	NA	NA	12.0482	3.40982	0.059	8.89912	NA	NA	0.675198	9.53001	0.083	3.40982	0.12449	NA	NA	567.096	194.659	195.444	514.005	16.8461	17.9298	523.868	39.0214	39.4869	NA	NA	NA	62.7598	9.36198		514.005	16.8461	3.27743	17.9298	3.48017
UK013	UK013_205	NA	2740	46940	702.2	5.77467	NA	NA	11.976	3.27421	0.0619	6.64115	NA	NA	0.712653	7.40441	0.0835	3.27421	0.44657	NA	NA	670.656	142.472	143.498	516.98	16.2661	17.3981	546.321	31.2944	31.9104	NA	NA	NA	3.9215	22.9142		516.98	16.2661	3.14637	17.3981	3.35816
UK013	UK013_595	NA	1296	22070	307.6	0.918209	NA	NA	11.9474	3.58644	0.0564	7.56723	NA	NA	0.650887	8.3741	0.0837	3.58644	0.26879	NA	NA	468.149	168.137	169.071	518.17	17.8566	18.898	509.025	33.5362	34.0534	NA	NA	NA	58.361	-10.6847		518.17	17.8566	3.44609	18.898	3.65632
UK013	UK013_206	NA	1119	19480	287	9.82877	NA	NA	11.9048	3.37305	0.0632	7.8831	NA	NA	0.731977	8.57443	0.084	3.37305	0.4413	NA	NA	714.968	168.062	168.923	519.954	16.8497	17.9567	557.713	36.8113	37.353	NA	NA	NA	2.47598	27.2758		519.954	16.8497	3.24061	17.9567	3.45352
UK013	UK013_130	NA	3490	62700	756	2.87452	NA	NA	11.8906	3.18317	0.0575	6.53333	NA	NA	0.666753	7.26753	0.0841	3.18317	-0.32973	NA	NA	510.762	143.974	145.045	520.549	15.9186	17.0885	518.736	29.5279	30.131	NA	NA	NA	92.3722	-1.91616		520.549	15.9186	3.05805	17.0885	3.28604
UK013	UK013_123	NA	1230	22720	283.2	1.28261	NA	NA	11.8203	3.26738	0.0564	7.93977	NA	NA	0.657886	8.58578	0.0846	3.26738	0.48246	NA	NA	468.149	176.476	177.368	523.521	16.4293	17.5773	513.32	34.6078	35.1157	NA	NA	NA	49.8599	-11.8278		523.521	16.4293	3.13824	17.5773	3.3574
UK013	UK013_476	NA	753	12880	212.6	2.21921	NA	NA	11.8203	3.24441	0.0611	7.86341	NA	NA	0.71271	8.50643	0.0846	3.24441	0.23552	NA	NA	642.756	169.653	170.527	523.521	16.3138	17.4694	546.354	35.9574	36.495	NA	NA	NA	20.6265	18.5506		523.521	16.3138	3.11617	17.4694	3.32314
UK013	UK013_399	NA	1240	20250	322	0.945113	NA	NA	11.7786	3.39268	0.0578	8.01628	NA	NA	0.676607	8.70466	0.0849	3.39268	0.10093	NA	NA	522.189	176.538	177.413	525.304	17.1151	18.2269	524.722	35.6833	36.193	NA	NA	NA	97.5529	-0.596565		525.304	17.1151	3.25813	18.2269	3.4704
UK013	UK013_23	NA	997	18800	224.3	1.90731	NA	NA	11.6959	3.23945	0.0539	7.58759	NA	NA	0.635413	8.25019	0.0855	3.23945	0.12051	NA	NA	366.874	171.612	172.561	528.868	16.4485	17.6171	499.462	32.559	33.0762	NA	NA	NA	8.65569	-44.1554		528.868	16.4485	3.11014	17.6171	3.36443
UK013	UK013_69	NA	3300	52500	651.6	9.28205	NA	NA	11.6822	3.23891	0.0599	7.06203	NA	NA	0.706971	7.76935	0.0856	3.23891	0.12307	NA	NA	599.964	153.351	154.328	529.462	16.4635	17.6335	542.946	32.6844	33.2692	NA	NA	NA	43.9537	11.751		529.462	16.4635	3.10948	17.6335	3.31636
UK013	UK013_470	NA	5800	97900	1627	6.16288	NA	NA	11.655	3.19578	0.0584	5.75107	NA	NA	0.690878	6.57935	0.0858	3.19578	0.52321	NA	NA	544.801	125.928	127.134	530.65	16.2792	17.4665	533.328	27.3028	27.9815	NA	NA	NA	81.8755	2.59745		530.65	16.2792	3.06779	17.4665	3.29055
UK013	UK013_419	NA	1115	20350	332.1	3.45218	NA	NA	11.6414	3.30691	0.0564	7.97324	NA	NA	0.667996	8.63181	0.0859	3.30691	0.61232	NA	NA	468.149	177.226	178.114	531.243	16.8634	18.0146	519.493	35.1143	35.6242	NA	NA	NA	40.0261	-13.4773		531.243	16.8634	3.17433	18.0146	3.38392
UK013	UK013_312	NA	2960	51200	643	7.05818	NA	NA	11.5875	3.15566	0.0545	6.74878	NA	NA	0.648498	7.45011	0.0863	3.15566	0.50969	NA	NA	391.768	151.857	152.916	533.618	16.1611	17.3688	507.554	29.7672	30.3459	NA	NA	NA	3.94729	-36.2076		533.618	16.1611	3.02858	17.3688	3.26047
UK013	UK013_142	NA	432	7090	82.2	0.66775	NA	NA	11.4548	4.06442	0.0582	10.5594	NA	NA	0.700549	11.3146	0.0873	4.06442	-0.028445	NA	NA	537.299	232.604	233.273	539.549	21.037	21.9981	539.119	47.3624	47.7642	NA	NA	NA	98.6877	-0.418784		539.549	21.037	3.89899	21.9981	4.07769
UK013	UK013_631	NA	1293	23640	347	1.07464	NA	NA	11.4155	3.42357	0.0521	7.68981	NA	NA	0.629279	8.41748	0.0876	3.42357	-0.10362	NA	NA	289.801	176.352	177.302	541.328	17.776	18.9106	495.647	33.0227	33.5268	NA	NA	NA	1.7936	-86.7927		541.328	17.776	3.28378	18.9106	3.57028
UK013	UK013_224	NA	2880	50200	737	12.6632	NA	NA	11.3766	3.15013	0.0606	6.68603	NA	NA	0.734451	7.39096	0.0879	3.15013	0.21152	NA	NA	625.066	144.532	145.558	543.105	16.4077	17.638	559.162	31.7888	32.4167	NA	NA	NA	32.6376	13.1123		543.105	16.4077	3.02109	17.638	3.23366
UK013	UK013_322	NA	493	9020	111.5	2.14423	NA	NA	11.3766	3.506	0.0553	9.553	NA	NA	0.670217	10.176	0.0879	3.506	0.20011	NA	NA	424.372	214.331	215.083	543.105	18.2613	19.3742	520.844	41.4851	41.9196	NA	NA	NA	28.2922	-27.9785		543.105	18.2613	3.36238	19.3742	3.58325
UK013	UK013_577	NA	468	8320	113.1	2.33196	NA	NA	11.3379	3.93365	0.0542	9.60852	NA	NA	0.659127	10.3825	0.0882	3.93365	0.0054445	NA	NA	379.369	217.308	218.062	544.883	20.553	21.5541	514.08	41.9054	42.3271	NA	NA	NA	18.145	-43.6288		544.883	20.553	3.77201	21.5541	4.00068
UK013	UK013_592	NA	1533	27000	364.1	4.62643	NA	NA	11.2867	3.55792	0.0558	7.57221	NA	NA	0.681662	8.36643	0.0886	3.55792	0.067074	NA	NA	444.419	168.943	169.881	547.252	18.6673	19.7729	527.779	34.4482	34.9805	NA	NA	NA	30.3231	-23.1387		547.252	18.6673	3.41109	19.7729	3.64103
UK013	UK013_620	NA	1957	33100	469	2.35678	NA	NA	11.2867	3.41461	0.0529	7.01895	NA	NA	0.646235	7.80546	0.0886	3.41461	0.10962	NA	NA	324.51	159.869	160.901	547.252	17.9154	19.0647	506.159	31.1217	31.6735	NA	NA	NA	1.48955	-68.6394		547.252	17.9154	3.2737	19.0647	3.54577
UK013	UK013_16	NA	2480	41500	474	4.36866	NA	NA	11.2486	3.31075	0.059	7.70465	NA	NA	0.723194	8.38587	0.0889	3.31075	-0.16239	NA	NA	567.096	168.331	169.234	549.028	17.4245	18.6113	552.551	35.7502	36.3	NA	NA	NA	86.7619	3.18601		549.028	17.4245	3.17369	18.6113	3.38494
UK013	UK013_315	NA	1530	24880	304.9	8.58873	NA	NA	11.2486	3.31075	0.0581	7.2865	NA	NA	0.712163	8.00338	0.0889	3.31075	0.74345	NA	NA	533.535	160.047	161.006	549.028	17.4245	18.6113	546.03	33.8141	34.3846	NA	NA	NA	80.1294	-2.90391		549.028	17.4245	3.17369	18.6113	3.38553
UK013	UK013_439	NA	1320	22950	366	35.0575	NA	NA	11.236	3.31008	0.0602	7.64484	NA	NA	0.738733	8.33068	0.089	3.31008	0.26675	NA	NA	610.771	165.789	166.692	549.62	17.439	18.6272	561.666	35.9539	36.5142	NA	NA	NA	49.9578	10.012		549.62	17.439	3.17291	18.6272	3.38128
UK013	UK013_339	NA	3350	58400	692	9.17772	NA	NA	11.2108	3.18146	0.0615	6.59264	NA	NA	0.756382	7.32015	0.0892	3.18146	0.31419	NA	NA	656.767	141.752	142.787	550.804	16.7959	18.0315	571.921	32.0196	32.6643	NA	NA	NA	17.8356	16.1341		550.804	16.7959	3.04934	18.0315	3.25983
UK013	UK013_2	NA	1170	18900	215	0.86	NA	NA	11.1982	3.26247	0.0607	8.2169	NA	NA	0.74738	8.84088	0.0893	3.26247	0.19337	NA	NA	628.62	177.758	178.597	551.396	17.2413	18.4495	566.703	38.4137	38.9458	NA	NA	NA	43.4361	12.2847		551.396	17.2413	3.12685	18.4495	3.33591
UK013	UK013_512	NA	2310	39400	569	3.10759	NA	NA	11.1982	3.33208	0.0622	6.95321	NA	NA	0.765849	7.71037	0.0893	3.33208	0.023599	NA	NA	680.992	148.949	149.928	551.396	17.6091	18.7937	577.379	33.967	34.5841	NA	NA	NA	17.3528	19.0305		551.396	17.6091	3.19356	18.7937	3.37642
UK013	UK013_145	NA	1397	24240	276.3	163.491	NA	NA	11.0988	3.19669	0.0587	7.52542	NA	NA	0.729229	8.17623	0.0901	3.19669	0.21337	NA	NA	555.987	164.699	165.625	556.129	17.0325	18.274	556.101	35.0241	35.5905	NA	NA	NA	99.8755	-0.0253869		556.129	17.0325	3.06269	18.274	3.28596
UK013	UK013_481	NA	1490	25120	382	2.78223	NA	NA	11.0742	3.37432	0.0615	8.23365	NA	NA	0.76571	8.89826	0.0903	3.37432	0.061379	NA	NA	656.767	177.289	178.123	557.311	18.0155	19.1982	577.299	39.2009	39.7369	NA	NA	NA	34.5799	15.1433		557.311	18.0155	3.23258	19.1982	3.42577
UK013	UK013_539	NA	4530	75500	1071	23.1317	NA	NA	11.0497	3.14175	0.0595	6.21788	NA	NA	0.742449	6.96653	0.0905	3.14175	0.4427	NA	NA	585.44	135.261	136.37	558.494	16.8079	18.0747	563.834	30.1496	30.819	NA	NA	NA	69.5713	4.60276		558.494	16.8079	3.0095	18.0747	3.23397
UK013	UK013_292	NA	2900	50300	686	5.33852	NA	NA	11.0375	3.29968	0.0594	7.08098	NA	NA	0.742021	7.81205	0.0906	3.29968	0.059406	NA	NA	581.788	154.236	155.214	559.085	17.6707	18.8821	563.584	33.8001	34.3984	NA	NA	NA	80.9059	3.90235		559.085	17.6707	3.16065	18.8821	3.37192
UK013	UK013_110	NA	792	14700	168.3	0.900482	NA	NA	11.0132	3.56253	0.0576	8.17522	NA	NA	0.721123	8.91772	0.0908	3.56253	0.37684	NA	NA	514.58	180.301	181.161	560.267	19.117	20.2464	551.33	37.9563	38.473	NA	NA	NA	61.2997	-8.87844		560.267	19.117	3.41212	20.2464	3.61809
UK013	UK013_75	NA	2505	38540	451.1	2.32766	NA	NA	10.9409	3.15558	0.0646	6.54941	NA	NA	0.814104	7.26997	0.0914	3.15558	-0.3466	NA	NA	761.336	138.424	139.448	563.812	17.0357	18.3089	604.754	33.1386	33.815	NA	NA	NA	5.47046	25.9444		563.812	17.0357	3.02153	18.3089	3.18551
UK013	UK013_208	NA	4150	68900	948	10.8343	NA	NA	10.917	3.87316	0.0645	6.21905	NA	NA	0.814623	7.32652	0.0916	3.87316	0.43743	NA	NA	758.068	131.479	132.557	564.993	20.9516	22.0034	605.044	33.4083	34.0799	NA	NA	NA	1.01281	25.4694		564.993	20.9516	3.7083	22.0034	3.86064
UK013	UK013_501	NA	471	7970	116.3	136.824	NA	NA	10.9051	3.49523	0.0654	9.5763	NA	NA	0.826891	10.1942	0.0917	3.49523	0.12957	NA	NA	787.231	202.118	202.823	565.583	18.9261	20.0865	611.886	46.8844	47.3738	NA	NA	NA	5.92625	28.1553		565.583	18.9261	3.3463	20.0865	3.5235
UK013	UK013_263	NA	638	10750	159.8	0.30969	NA	NA	10.8578	3.5772	0.0587	9.01106	NA	NA	0.745417	9.69512	0.0921	3.5772	0.64196	NA	NA	555.987	197.504	198.281	567.945	19.4473	20.5872	565.561	42.066	42.5512	NA	NA	NA	88.5339	-2.15068		567.945	19.4473	3.42415	20.5872	3.62283
UK013	UK013_250	NA	1390	24460	363	2.65351	NA	NA	10.846	3.38457	0.0539	7.49666	NA	NA	0.685206	8.22528	0.0922	3.38457	0.3691	NA	NA	366.874	169.54	170.501	568.535	18.4184	19.6204	529.916	33.9712	34.5141	NA	NA	NA	1.45977	-54.9675		568.535	18.4184	3.23963	19.6204	3.47893
UK013	UK013_457	NA	444	6950	105.8	11.9413	NA	NA	10.8108	4.21843	0.067	11.3466	NA	NA	0.854511	12.1054	0.0925	4.21843	-0.11855	NA	NA	837.774	238.049	238.643	570.306	23.0246	24.0027	627.122	56.6954	57.1161	NA	NA	NA	7.97725	31.9261		570.306	23.0246	4.03723	24.0027	4.14228
UK013	UK013_188	NA	2660	45400	551	2.35672	NA	NA	10.7181	3.45269	0.0553	7.00762	NA	NA	0.71139	7.81203	0.0933	3.45269	0.37119	NA	NA	424.372	156.816	157.831	575.024	18.9941	20.1867	545.572	32.9842	33.568	NA	NA	NA	5.75418	-35.4999		575.024	18.9941	3.30319	20.1867	3.53614
UK013	UK013_287	NA	4400	76300	1058	1.18345	NA	NA	10.627	3.23721	0.0574	6.14731	NA	NA	0.744737	6.94758	0.0941	3.23721	0.37491	NA	NA	506.935	135.517	136.654	579.74	17.9483	19.2251	565.166	30.1206	30.7931	NA	NA	NA	30.7294	-14.3618		579.74	17.9483	3.09592	19.2251	3.32875
UK013	UK013_578	NA	2480	40800	507.2	2.27955	NA	NA	10.6157	3.29982	0.0616	6.9817	NA	NA	0.800079	7.72224	0.0942	3.29982	0.19258	NA	NA	660.251	150.077	151.055	580.329	18.3132	19.5686	596.873	34.8646	35.4961	NA	NA	NA	36.2267	12.1048		580.329	18.3132	3.15566	19.5686	3.35679
UK013	UK013_353	NA	492	8100	94.7	3.97899	NA	NA	10.5932	3.63894	0.0649	10.8597	NA	NA	0.84473	11.4531	0.0944	3.63894	0.35003	NA	NA	771.096	230.152	230.778	581.507	20.2344	21.3816	621.753	53.3014	53.7429	NA	NA	NA	11.3693	24.587		581.507	20.2344	3.47965	21.3816	3.67528
UK013	UK013_73	NA	3170	57700	646	3.96076	NA	NA	10.5263	3.295	0.055	7.11755	NA	NA	0.720423	7.84325	0.095	3.295	-0.10141	NA	NA	412.223	159.63	160.633	585.04	18.4283	19.6951	550.917	33.3607	33.9465	NA	NA	NA	8.28145	-41.9232		585.04	18.4283	3.14991	19.6951	3.41858
UK013	UK013_237	NA	2940	47460	674	8.64103	NA	NA	10.5263	3.49018	0.061	6.60144	NA	NA	0.799015	7.46729	0.095	3.49018	0.45147	NA	NA	639.234	142.357	143.394	585.04	19.5199	20.7201	596.273	33.6878	34.3399	NA	NA	NA	46.1335	8.47793		585.04	19.5199	3.3365	20.7201	3.53575
UK013	UK013_328	NA	11030	187700	2102	11.6778	NA	NA	10.5263	3.1951	0.0591	5.32781	NA	NA	0.774127	6.21242	0.095	3.1951	0.16415	NA	NA	570.782	116.115	117.409	585.04	17.8695	19.1733	582.128	27.5312	28.2978	NA	NA	NA	84.7225	-2.49805		585.04	17.8695	3.05441	19.1733	3.28154
UK013	UK013_531	NA	1175	19040	258	5.87699	NA	NA	10.4822	3.74842	0.061	7.98902	NA	NA	0.802379	8.82469	0.0954	3.74842	0.093317	NA	NA	639.234	172.484	173.345	587.395	21.0447	22.1709	598.17	39.9104	40.4652	NA	NA	NA	62.0136	8.10961		587.395	21.0447	3.58273	22.1709	3.76122
UK013	UK013_40	NA	816	14080	153	1.00658	NA	NA	10.4275	3.62077	0.0587	8.49028	NA	NA	0.776172	9.23011	0.0959	3.62077	0.023346	NA	NA	555.987	185.988	186.811	590.336	20.4253	21.5946	583.297	40.9775	41.4986	NA	NA	NA	75.564	-6.17804		590.336	20.4253	3.45994	21.5946	3.66654
UK013	UK013_151	NA	4900	82300	869	2.45342	NA	NA	10.3842	3.12537	0.0597	5.97046	NA	NA	0.792687	6.73902	0.0963	3.12537	0.023045	NA	NA	592.719	129.696	130.849	592.689	17.6977	19.0451	592.695	30.2658	30.9835	NA	NA	NA	99.9717	0.00500988		592.689	17.6977	2.986	19.0451	3.21334
UK013	UK013_48	NA	241	3900	43.6	3.17784	NA	NA	10.3734	5.15478	0.067	15.2523	NA	NA	0.890539	16.0998	0.0964	5.15478	0.36381	NA	NA	837.774	321.908	322.358	593.277	29.2173	30.0542	646.659	77.1531	77.4778	NA	NA	NA	14.706	29.1841		593.277	29.2173	4.92473	30.0542	5.06654
UK013	UK013_428	NA	617	9350	144.3	1.05792	NA	NA	10.3306	3.88773	0.0639	8.65936	NA	NA	0.852859	9.49204	0.0968	3.88773	-0.10718	NA	NA	738.322	184.044	184.827	595.628	22.1189	23.2213	626.217	44.3916	44.9257	NA	NA	NA	24.0469	19.3268		595.628	22.1189	3.71355	23.2213	3.85556
UK013	UK013_261	NA	1270	22200	310.3	0.787963	NA	NA	10.2881	3.52244	0.0566	8.75628	NA	NA	0.75855	9.43822	0.0972	3.52244	-0.089683	NA	NA	475.982	194.522	195.332	597.979	20.1161	21.331	573.173	41.3609	41.864	NA	NA	NA	29.3351	-25.6306		597.979	20.1161	3.36401	21.331	3.59947
UK013	UK013_603	NA	2198	35220	427.6	3.6641	NA	NA	10.2881	3.18657	0.0606	7.02266	NA	NA	0.812157	7.71181	0.0972	3.18657	0.22273	NA	NA	625.066	151.85	152.829	597.979	18.198	19.5326	603.664	35.1078	35.7454	NA	NA	NA	75.0976	4.33352		597.979	18.198	3.04325	19.5326	3.2619
UK013	UK013_231	NA	1776	31010	417.1	3.29723	NA	NA	10.2669	3.41755	0.0601	7.45687	NA	NA	0.807114	8.20272	0.0974	3.41755	0.34914	NA	NA	607.177	161.783	162.709	599.154	19.5537	20.806	600.834	37.2161	37.8142	NA	NA	NA	92.4599	1.32135		599.154	19.5537	3.26355	20.806	3.47158
UK013	UK013_114	NA	3960	67900	732	8.46243	NA	NA	10.2145	3.12134	0.0619	6.15488	NA	NA	0.835554	6.90111	0.0979	3.12134	0.47648	NA	NA	670.656	131.992	133.097	602.09	17.9424	19.3119	616.689	31.908	32.6299	NA	NA	NA	30.3178	10.2236		602.09	17.9424	2.98002	19.3119	3.20311
UK013	UK013_257	NA	2440	41740	584	2.67032	NA	NA	10.2145	3.29937	0.0576	7.13102	NA	NA	0.777511	7.85731	0.0979	3.29937	-0.0041388	NA	NA	514.58	157.12	158.103	602.09	18.9658	20.2662	584.063	34.9115	35.5225	NA	NA	NA	36.2341	-17.0062		602.09	18.9658	3.14999	20.2662	3.3896
UK013	UK013_565	NA	1433	25210	305.4	4.02372	NA	NA	10.2041	3.25766	0.0594	7.60171	NA	NA	0.802627	8.27033	0.098	3.25766	-0.17509	NA	NA	581.788	165.654	166.567	602.677	18.7434	20.0607	598.309	37.4074	37.9988	NA	NA	NA	84.4736	-3.59056		602.677	18.7434	3.11003	20.0607	3.33435
UK013	UK013_179	NA	4130	68300	773	2.51219	NA	NA	10.1833	3.10692	0.0551	6.25147	NA	NA	0.746044	6.98096	0.0982	3.10692	0.30868	NA	NA	416.283	140.007	141.143	603.852	17.9093	19.2886	565.926	30.2959	30.9659	NA	NA	NA	1.05912	-45.0579		603.852	17.9093	2.96585	19.2886	3.2313
UK013	UK013_297	NA	140	2350	28.6	1.17695	NA	NA	10.1729	5.59279	0.06	15.4601	NA	NA	0.813216	16.4406	0.0983	5.59279	0.24241	NA	NA	603.575	339.333	339.795	604.439	32.2688	33.0556	604.257	75.0054	75.3081	NA	NA	NA	99.6078	-0.14314		604.439	32.2688	5.33864	33.0556	5.46895
UK013	UK013_349	NA	2570	43300	476	3.3427	NA	NA	10.1317	3.4564	0.0639	6.874	NA	NA	0.8696	7.69406	0.0987	3.4564	0.1038	NA	NA	738.322	145.865	146.846	606.786	20.0162	21.2704	635.35	36.3531	37.0164	NA	NA	NA	15.2981	17.8156		606.786	20.0162	3.29873	21.2704	3.47268
UK013	UK013_32	NA	2350	38970	406	5.53134	NA	NA	10.101	3.23347	0.0638	6.97566	NA	NA	0.870878	7.68864	0.099	3.23347	0.21151	NA	NA	735.007	148.114	149.081	608.546	18.777	20.1157	636.044	36.356	37.0203	NA	NA	NA	14.3306	17.2054		608.546	18.777	3.08555	20.1157	3.28425
UK013	UK013_234	NA	2500	43780	588	1.94509	NA	NA	10.0908	3.14758	0.0572	6.65813	NA	NA	0.781576	7.36464	0.0991	3.14758	0.41726	NA	NA	499.252	147.03	148.083	609.132	18.295	19.669	586.382	32.817	33.4699	NA	NA	NA	12.7972	-22.0089		609.132	18.295	3.00345	19.669	3.24124
UK013	UK013_504	NA	1970	31100	409.2	1.47886	NA	NA	10.0604	3.19557	0.0663	7.19045	NA	NA	0.90866	7.86856	0.0994	3.19557	-0.094059	NA	NA	815.861	150.72	151.647	610.892	18.6251	19.9836	656.345	38.0541	38.7183	NA	NA	NA	4.10943	25.1231		610.892	18.6251	3.04884	19.9836	3.22168
UK013	UK013_359	NA	1730	28860	322.1	2.86057	NA	NA	10.01	3.13055	0.0654	7.41236	NA	NA	0.900833	8.04633	0.0999	3.13055	-0.027812	NA	NA	787.231	156.116	157.02	613.823	18.3295	19.7206	652.173	38.7381	39.385	NA	NA	NA	8.01744	22.0276		613.823	18.3295	2.98613	19.7206	3.17648
UK013	UK013_380	NA	1560	26660	337	3.31041	NA	NA	10	3.28742	0.0586	7.72548	NA	NA	0.807977	8.39585	0.1	3.28742	0.24228	NA	NA	552.267	169.215	170.118	614.409	19.2656	20.5959	601.318	38.1157	38.7007	NA	NA	NA	49.2166	-11.2521		614.409	19.2656	3.13563	20.5959	3.36183
UK013	UK013_556	NA	918	14170	176	1.19973	NA	NA	10	3.37414	0.0677	8.17251	NA	NA	0.933448	8.84165	0.1	3.37414	0.3003	NA	NA	859.383	170.268	171.08	614.409	19.7738	21.072	669.447	43.3695	43.9703	NA	NA	NA	1.02579	28.5058		614.409	19.7738	3.21835	21.072	3.41018
UK013	UK013_406	NA	5380	89600	1188	24.2945	NA	NA	9.83284	3.14023	0.0617	5.88843	NA	NA	0.865182	6.67343	0.1017	3.14023	0.56101	NA	NA	663.727	126.399	127.554	624.364	18.6869	20.0967	632.948	31.4415	32.2017	NA	NA	NA	51.1415	5.93059		624.364	18.6869	2.99296	20.0967	3.21766
UK013	UK013_543	NA	1920	33100	414	1.55581	NA	NA	9.78474	3.16911	0.0584	7.57896	NA	NA	0.822934	8.21486	0.1022	3.16911	0.14937	NA	NA	544.801	166.195	167.116	627.289	18.9429	20.347	609.684	37.6724	38.2761	NA	NA	NA	37.0358	-15.141		627.289	18.9429	3.01981	20.347	3.25877
UK013	UK013_91	NA	2570	42200	442	3.06731	NA	NA	9.77517	3.23713	0.0632	6.54215	NA	NA	0.891444	7.29923	0.1023	3.23713	0.4365	NA	NA	714.968	139.318	140.351	627.874	19.3667	20.7445	647.145	34.9445	35.6522	NA	NA	NA	22.7744	12.1815		627.874	19.3667	3.08449	20.7445	3.2966
UK013	UK013_84	NA	1842	31630	324.1	0.941604	NA	NA	9.72763	3.35503	0.0605	7.23008	NA	NA	0.857531	7.97059	0.1028	3.35503	-0.0076427	NA	NA	621.505	156.455	157.407	630.797	20.161	21.4994	628.774	37.3792	38.0151	NA	NA	NA	92.427	-1.49518		630.797	20.161	3.19612	21.4994	3.41077
UK013	UK013_608	NA	1640	28420	331	4.3099	NA	NA	9.65251	3.24965	0.0557	7.79392	NA	NA	0.795639	8.44425	0.1036	3.24965	0.26148	NA	NA	440.43	174.047	174.96	635.472	19.6655	21.0541	594.366	38.0094	38.5861	NA	NA	NA	2.7831	-44.2844		635.472	19.6655	3.09463	21.0541	3.34433
UK013	UK013_21	NA	4000	67200	659	1.58795	NA	NA	9.59693	3.1479	0.061	6.40911	NA	NA	0.876393	7.14045	0.1042	3.1479	-0.27933	NA	NA	639.234	138.189	139.256	638.976	19.1496	20.5875	639.033	33.8759	34.5925	NA	NA	NA	99.7901	0.0404292		638.976	19.1496	2.99693	20.5875	3.22188
UK013	UK013_447	NA	5340	87400	1191	4.38836	NA	NA	9.57854	3.19382	0.0618	5.83131	NA	NA	0.889591	6.64866	0.1044	3.19382	-0.017448	NA	NA	667.195	125.097	126.262	640.143	19.4627	20.8838	646.149	31.7928	32.5671	NA	NA	NA	74.9447	4.05456		640.143	19.4627	3.04037	20.8838	3.25398
UK013	UK013_127	NA	2480	41400	407.7	6.10329	NA	NA	9.49668	3.24191	0.0606	7.15746	NA	NA	0.879837	7.85743	0.1053	3.24191	-0.19902	NA	NA	625.066	154.782	155.743	645.394	19.9099	21.3223	640.895	37.3584	38.0123	NA	NA	NA	84.3642	-3.25213		645.394	19.9099	3.08492	21.3223	3.3098
UK013	UK013_311	NA	1800	29310	303	5.78244	NA	NA	9.44287	3.29533	0.0585	8.1454	NA	NA	0.854187	8.78674	0.1059	3.29533	-0.3785	NA	NA	548.538	178.598	179.456	648.893	20.3422	21.7404	626.945	41.1239	41.7006	NA	NA	NA	39.8691	-18.2949		648.893	20.3422	3.13491	21.7404	3.38125
UK013	UK013_300	NA	4170	64300	699	3.64062	NA	NA	9.40734	3.18711	0.0655	6.04911	NA	NA	0.96001	6.83735	0.1063	3.18711	0.44444	NA	NA	790.438	127.205	128.307	651.224	19.7413	21.1887	683.302	34.0171	34.8011	NA	NA	NA	3.98556	17.6122		651.224	19.7413	3.03142	21.1887	3.24035
UK013	UK013_105	NA	6690	110100	1060	10.2119	NA	NA	9.28505	3.13857	0.0651	5.90631	NA	NA	0.966714	6.68843	0.1077	3.13857	0.20663	NA	NA	777.57	124.448	125.578	659.377	19.6718	21.1574	686.769	33.3939	34.1978	NA	NA	NA	12.1422	15.2004		659.377	19.6718	2.9834	21.1574	3.18273
UK013	UK013_165	NA	5370	91100	869	3.21376	NA	NA	9.1659	3.26068	0.0562	6.02025	NA	NA	0.8454	6.84656	0.1091	3.26068	-0.09539	NA	NA	460.278	133.776	134.946	667.519	20.6767	22.1272	622.121	31.8579	32.5901	NA	NA	NA	2.05289	-45.025		667.519	20.6767	3.09755	22.1272	3.38909
UK013	UK013_576	NA	1620	27300	293.9	3.09368	NA	NA	8.94454	3.32143	0.0581	7.50355	NA	NA	0.895611	8.2058	0.1118	3.32143	0.17921	NA	NA	533.535	164.847	165.778	683.193	21.5308	22.9882	649.379	39.3857	40.0183	NA	NA	NA	9.81985	-28.0503		683.193	21.5308	3.15149	22.9882	3.39696
UK013	UK013_480	NA	586	9850	121.7	1.33883	NA	NA	8.84956	3.21095	0.0623	8.84025	NA	NA	0.970661	9.40532	0.113	3.21095	0.42991	NA	NA	684.423	189.594	190.369	690.147	21.0153	22.534	688.805	47.0728	47.6496	NA	NA	NA	94.9567	-0.836358		690.147	21.0153	3.04505	22.534	3.26517
UK013	UK013_324	NA	6460	105700	985	3.674	NA	NA	8.82613	3.15131	0.0603	5.66549	NA	NA	0.941995	6.48295	0.1133	3.15131	0.22762	NA	NA	614.357	122.599	123.809	691.884	20.6742	22.2234	673.926	31.9408	32.7585	NA	NA	NA	28.6391	-12.6193		691.884	20.6742	2.9881	22.2234	3.23277
UK013	UK013_135	NA	2123	33550	303.8	5.71053	NA	NA	8.726	3.3637	0.064	6.95324	NA	NA	1.01127	7.72413	0.1146	3.3637	-0.22519	NA	NA	741.63	147.476	148.445	699.408	22.2948	23.7674	709.514	39.4543	40.1687	NA	NA	NA	68.3637	5.69325		699.408	22.2948	3.18767	23.7674	3.38441
UK013	UK013_246	NA	1212	18290	208.8	3.25741	NA	NA	8.39631	3.61059	0.0661	7.92346	NA	NA	1.08546	8.70733	0.1191	3.61059	0.15387	NA	NA	809.544	166.358	167.202	725.381	24.7709	26.1968	746.297	46.0495	46.7071	NA	NA	NA	39.4484	10.3963		725.381	24.7709	3.41488	26.1968	3.59292
UK013	UK013_587	NA	3240	49710	494	12.9319	NA	NA	8.37521	4.04614	0.0643	6.69756	NA	NA	1.05856	7.82487	0.1194	4.04614	0.72855	NA	NA	751.514	141.797	142.8	727.109	27.8215	29.104	733.115	40.8784	41.5999	NA	NA	NA	66.9608	3.24739		727.109	27.8215	3.82632	29.104	4.00516
UK013	UK013_598	NA	674	10270	102.5	3.41667	NA	NA	8.3612	3.58291	0.0638	8.91758	NA	NA	1.05209	9.61043	0.1196	3.58291	-0.24128	NA	NA	735.007	189.685	190.446	728.261	24.6732	26.1148	729.917	50.0704	50.6583	NA	NA	NA	95.6631	0.917808		728.261	24.6732	3.38796	26.1148	3.58393
UK013	UK013_336	NA	2780	42900	368.9	1.27295	NA	NA	8.22368	3.25734	0.0676	7.01036	NA	NA	1.1334	7.73016	0.1216	3.25734	0.22704	NA	NA	856.315	145.981	146.925	739.766	22.7655	24.3657	769.371	41.7227	42.4772	NA	NA	NA	17.0198	13.6105		739.766	22.7655	3.0774	24.3657	3.27305
UK013	UK013_158	NA	1060	17980	148.9	1.88005	NA	NA	8.1103	3.68682	0.0604	8.48672	NA	NA	1.02684	9.25295	0.1233	3.68682	0.34213	NA	NA	617.935	183.973	184.788	749.53	26.088	27.5298	717.344	47.6333	48.2363	NA	NA	NA	15.4763	-21.2959		749.53	26.088	3.48058	27.5298	3.69395
UK013	UK013_117	NA	6290	96200	807	8.68676	NA	NA	8.03859	3.23111	0.0684	6.10663	NA	NA	1.17322	6.90876	0.1244	3.23111	-0.019097	NA	NA	880.699	126.589	127.665	755.839	23.0447	24.69	788.148	37.8884	38.744	NA	NA	NA	15.1717	14.1773		755.839	23.0447	3.04889	24.69	3.22972
UK013	UK013_203	NA	1260	21490	210.1	1.94357	NA	NA	8.00641	3.24436	0.0646	8.44578	NA	NA	1.11249	9.04749	0.1249	3.24436	0.027268	NA	NA	761.336	178.796	179.596	758.705	23.2219	24.8668	759.372	48.4159	49.0568	NA	NA	NA	97.9964	0.345493		758.705	23.2219	3.06072	24.8668	3.27701
UK013	UK013_605	NA	1870	28980	278.3	2.62795	NA	NA	8.00641	3.22932	0.0635	7.4019	NA	NA	1.09355	8.07568	0.1249	3.22932	-0.039755	NA	NA	725.019	157.477	158.391	758.705	23.1142	24.7663	750.226	42.857	43.5676	NA	NA	NA	73.1129	-4.64624		758.705	23.1142	3.04653	24.7663	3.27292
UK013	UK013_70	NA	3042	47600	394	6.11801	NA	NA	7.93021	3.15763	0.0609	6.46226	NA	NA	1.05885	7.19246	0.1261	3.15763	0.2629	NA	NA	635.704	139.423	140.482	765.578	22.794	24.4954	733.255	37.5764	38.36	NA	NA	NA	8.96621	-20.43		765.578	22.794	2.97735	24.4954	3.22812
UK013	UK013_134	NA	4490	69600	558	2.75828	NA	NA	7.83699	3.38214	0.066	6.22554	NA	NA	1.16117	7.08493	0.1276	3.38214	0.26502	NA	NA	806.376	130.597	131.665	774.159	24.6722	26.2846	782.505	38.6707	39.5016	NA	NA	NA	67.6968	3.99519		774.159	24.6722	3.18696	26.2846	3.38721
UK013	UK013_627	NA	9240	134200	1337	2.66866	NA	NA	7.79423	3.14058	0.0634	5.48253	NA	NA	1.12155	6.31834	0.1283	3.14058	0.65304	NA	NA	721.676	116.539	117.766	778.16	23.0214	24.7578	763.715	33.928	34.842	NA	NA	NA	25.782	-7.82684		778.16	23.0214	2.95844	24.7578	3.18406
UK013	UK013_299	NA	3920	57900	533	7.13521	NA	NA	7.72798	3.18713	0.0674	6.41608	NA	NA	1.20253	7.16407	0.1294	3.18713	-0.14737	NA	NA	850.159	133.676	134.706	784.442	23.54	25.2658	801.753	39.7361	40.5714	NA	NA	NA	48.2243	7.72996		784.442	23.54	3.00086	25.2658	3.20079
UK013	UK013_156	NA	5300	82900	646	8.99721	NA	NA	7.68049	3.15989	0.0642	5.80775	NA	NA	1.15252	6.61172	0.1302	3.15989	0.58517	NA	NA	748.226	122.945	124.1	789.006	23.4664	25.2156	778.431	35.9606	36.8463	NA	NA	NA	46.7615	-5.45023		789.006	23.4664	2.97418	25.2156	3.19901
UK013	UK013_147	NA	933	12870	98.3	3.77496	NA	NA	7.62777	4.2466	0.0705	8.15125	NA	NA	1.27436	9.19111	0.1311	4.2466	0.05407	NA	NA	942.951	167.61	168.414	794.138	31.7296	33.06	834.34	52.3378	53.0094	NA	NA	NA	18.2624	15.7817		794.138	31.7296	3.99548	33.06	4.11143
UK013	UK013_489	NA	440	6380	65.8	0.652131	NA	NA	7.55287	4.06958	0.069	10.3445	NA	NA	1.25962	11.1162	0.1324	4.06958	0.036601	NA	NA	898.74	214.671	215.313	801.542	30.6732	32.0712	827.735	63.0009	63.5551	NA	NA	NA	45.1502	10.8149		801.542	30.6732	3.82677	32.0712	3.97808
UK013	UK013_319	NA	2340	34780	283.6	4.38331	NA	NA	7.51315	3.4592	0.0639	7.07969	NA	NA	1.17268	7.8796	0.1331	3.4592	0.31343	NA	NA	738.322	150.254	151.207	805.526	26.1943	27.833	787.899	43.2096	43.9619	NA	NA	NA	40.8696	-9.10226		805.526	26.1943	3.25182	27.833	3.46938
UK013	UK013_375	NA	3310	47900	438	2.58712	NA	NA	7.40741	3.28064	0.0698	6.45302	NA	NA	1.29924	7.23907	0.135	3.28064	0.35287	NA	NA	922.475	132.93	133.943	816.327	25.1546	26.8985	845.388	41.5585	42.4144	NA	NA	NA	15.2915	11.507		816.327	25.1546	3.08144	26.8985	3.27729
UK013	UK013_276	NA	2890	42600	420	2.81313	NA	NA	7.30994	3.16782	0.0656	6.34644	NA	NA	1.23735	7.09312	0.1368	3.16782	0.62254	NA	NA	793.638	133.417	134.468	826.542	24.5744	26.3973	817.678	39.8518	40.7062	NA	NA	NA	56.7874	-4.1459		826.542	24.5744	2.97316	26.3973	3.1937
UK013	UK013_483	NA	7260	102900	1033	1.98654	NA	NA	7.26216	3.31501	0.0723	5.63357	NA	NA	1.37269	6.53655	0.1377	3.31501	0.24695	NA	NA	994.397	114.706	115.85	831.643	25.865	27.6223	877.317	38.4165	39.3844	NA	NA	NA	2.64861	16.3671		831.643	25.865	3.11011	27.6223	3.27802
UK013	UK013_288	NA	1640	23500	210.8	3.05507	NA	NA	6.97837	3.41621	0.0699	7.65657	NA	NA	1.3811	8.38412	0.1433	3.41621	0.69349	NA	NA	925.417	157.8	158.656	863.296	27.6027	29.3719	880.908	49.4171	50.1781	NA	NA	NA	33.5877	6.71274		863.296	27.6027	3.19736	29.3719	3.41268
UK013	UK013_421	NA	2540	35910	340	3.11927	NA	NA	6.88705	3.19395	0.0728	6.90728	NA	NA	1.45747	7.60998	0.1452	3.19395	-0.089841	NA	NA	1008.39	140.462	141.397	874	26.1056	28.0117	912.963	45.8585	46.7141	NA	NA	NA	15.8857	13.3272		874	26.1056	2.98691	28.0117	3.16887
UK013	UK013_95	NA	418	5530	39.91	3.12041	NA	NA	6.82594	3.53574	0.082	12.0802	NA	NA	1.65635	12.587	0.1465	3.53574	-0.1848	NA	NA	1245.52	238.419	238.944	881.314	29.125	30.8712	991.982	79.857	80.4063	NA	NA	NA	1.76979	29.2411		881.314	29.125	3.30472	30.8712	3.44017
UK013	UK013_280	NA	3970	57800	527	2.26667	NA	NA	6.77048	3.22338	0.0668	6.27752	NA	NA	1.36037	7.05673	0.1477	3.22338	0.15984	NA	NA	831.544	131.164	132.219	888.058	26.7414	28.6595	872.031	41.319	42.214	NA	NA	NA	47.9005	-6.79621		888.058	26.7414	3.01122	28.6595	3.24273
UK013	UK013_636	NA	2940	39180	337.9	1.54787	NA	NA	6.70241	3.20702	0.0726	6.53461	NA	NA	1.49351	7.27916	0.1492	3.20702	0.48415	NA	NA	1002.81	132.961	133.949	896.477	26.8408	28.7851	927.745	44.2979	45.2003	NA	NA	NA	11.4425	10.6033		896.477	26.8408	2.99404	28.7851	3.2019
UK013	UK013_20	NA	3260	45310	306.8	3.65238	NA	NA	6.61813	3.15808	0.0726	6.67044	NA	NA	1.51252	7.38027	0.1511	3.15808	-0.27447	NA	NA	1002.81	135.738	136.706	907.127	26.7237	28.7178	935.46	45.1419	46.0368	NA	NA	NA	33.5085	9.5414		907.127	26.7237	2.94597	28.7178	3.13624
UK013	UK013_426	NA	8540	122800	1151	2.3781	NA	NA	6.60939	3.09311	0.0708	5.65892	NA	NA	1.47698	6.44908	0.1513	3.09311	0.28292	NA	NA	951.645	115.983	117.13	908.247	26.204	28.2394	920.992	39.0655	40.0764	NA	NA	NA	52.9563	4.56033		908.247	26.204	2.88512	28.2394	3.09883
UK013	UK013_118	NA	4450	63000	429	2.41963	NA	NA	6.51466	3.16346	0.0735	6.17422	NA	NA	1.5556	6.93747	0.1535	3.16346	0.19533	NA	NA	1027.77	125.12	126.161	920.553	27.1378	29.1562	952.719	42.9036	43.8649	NA	NA	NA	16.6237	10.4321		920.553	27.1378	2.94799	29.1562	3.14194
UK013	UK013_173	NA	3490	47230	329	2.36351	NA	NA	6.45578	3.18152	0.0681	6.26595	NA	NA	1.45445	7.02739	0.1549	3.18152	0.35373	NA	NA	871.599	130.092	131.143	928.372	27.5082	29.5318	911.717	42.3078	43.2317	NA	NA	NA	41.969	-6.51368		928.372	27.5082	2.96306	29.5318	3.1929
UK013	UK013_100	NA	11190	160300	1060	5.17831	NA	NA	6.43915	3.30165	0.0738	5.24301	NA	NA	1.58026	6.19597	0.1553	3.30165	0.71135	NA	NA	1036	106.055	107.275	930.605	28.6107	30.5699	962.472	38.549	39.6285	NA	NA	NA	2.05133	10.1736		930.605	28.6107	3.07442	30.5699	3.28354
UK013	UK013_575	NA	3100	40700	310.6	4.53431	NA	NA	6.42261	3.16918	0.0753	6.56129	NA	NA	1.61653	7.28658	0.1557	3.16918	0.44006	NA	NA	1076.52	132.025	132.998	932.836	27.524	29.564	976.647	45.741	46.6711	NA	NA	NA	3.89079	13.3471		932.836	27.524	2.95057	29.564	3.15459
UK013	UK013_120	NA	6460	93200	618	11.0555	NA	NA	6.34518	3.19688	0.0723	5.73258	NA	NA	1.57107	6.56373	0.1576	3.19688	-0.1558	NA	NA	994.397	116.729	117.854	943.426	28.0572	30.1021	958.849	40.747	41.7654	NA	NA	NA	56.128	5.1259		943.426	28.0572	2.97397	30.1021	3.17301
UK013	UK013_12	NA	5650	74400	479	4.58373	NA	NA	6.29327	3.14317	0.075	5.86646	NA	NA	1.64318	6.65543	0.1589	3.14317	-0.11655	NA	NA	1068.5	118.131	119.218	950.661	27.7822	29.8744	986.937	42.0352	43.0575	NA	NA	NA	17.4449	11.0286		950.661	27.7822	2.92241	29.8744	3.10505
UK013	UK013_496	NA	3590	48400	406	1.98049	NA	NA	6.23441	3.32262	0.0759	6.28742	NA	NA	1.6786	7.11136	0.1604	3.32262	0.1695	NA	NA	1092.43	126.19	127.202	958.999	29.6073	31.61	1000.45	45.2804	46.2465	NA	NA	NA	9.89886	12.2144		958.999	29.6073	3.08731	31.61	3.2608
UK013	UK013_640	NA	7730	108700	875	7.47863	NA	NA	6.21891	3.26966	0.0715	5.63293	NA	NA	1.58523	6.51311	0.1608	3.26966	0.43534	NA	NA	971.742	115.092	116.24	961.221	29.198	31.2354	964.427	40.5735	41.6032	NA	NA	NA	86.7129	1.08273		961.221	29.198	3.03759	31.2354	3.24708
UK013	UK013_132	NA	6680	92100	575	1.15	NA	NA	6.11621	3.24927	0.0733	5.65359	NA	NA	1.65243	6.5208	0.1635	3.24927	0.51436	NA	NA	1022.26	114.627	115.762	976.198	29.4346	31.5135	990.482	41.2714	42.3164	NA	NA	NA	43.3648	4.50578		976.198	29.4346	3.01523	31.5135	3.21994
UK013	UK013_327	NA	4630	62400	404.9	89.7783	NA	NA	6.11621	3.2982	0.0737	6.01735	NA	NA	1.66145	6.86197	0.1635	3.2982	-0.093532	NA	NA	1033.26	121.827	122.893	976.198	29.8779	31.928	993.928	43.5225	44.5189	NA	NA	NA	52.0843	5.52292		976.198	29.8779	3.06064	31.928	3.25108
UK013	UK013_434	NA	5670	80000	696	1.68932	NA	NA	6.11247	3.10969	0.0739	5.97686	NA	NA	1.66697	6.73743	0.1636	3.10969	0.20632	NA	NA	1038.74	120.904	121.976	976.752	28.1849	30.3518	996.035	42.785	43.8006	NA	NA	NA	40.5308	5.96743		976.752	28.1849	2.88558	30.3518	3.09211
UK013	UK013_323	NA	5900	81700	541	2.41518	NA	NA	6.10501	3.28461	0.07	5.79074	NA	NA	1.58093	6.65742	0.1638	3.28461	0.31685	NA	NA	928.353	119.124	120.25	977.86	29.8017	31.8629	962.736	41.4299	42.4368	NA	NA	NA	47.6717	-5.33275		977.86	29.8017	3.04764	31.8629	3.27255
UK013	UK013_584	NA	3590	50300	358.5	2.46901	NA	NA	6.07533	3.28195	0.0706	6.24649	NA	NA	1.60227	7.05619	0.1646	3.28195	0.45534	NA	NA	945.854	128.19	129.232	982.29	29.9025	31.9739	971.096	44.1425	45.0989	NA	NA	NA	57.8894	-3.8521		982.29	29.9025	3.04416	31.9739	3.2619
UK013	UK013_164	NA	3050	41800	260.7	3.476	NA	NA	6.04961	3.16945	0.0705	6.53088	NA	NA	1.60681	7.25933	0.1653	3.16945	-0.0065417	NA	NA	942.951	134.114	135.112	986.163	28.9828	31.1306	972.864	45.4644	46.3956	NA	NA	NA	62.1543	-4.58264		986.163	28.9828	2.93894	31.1306	3.16928
UK013	UK013_435	NA	7350	102400	874	4.20597	NA	NA	5.9988	3.32512	0.0745	5.84251	NA	NA	1.71235	6.72245	0.1667	3.32512	0.34774	NA	NA	1055.04	117.885	118.979	993.903	30.6271	32.6957	1013.17	43.1187	44.1468	NA	NA	NA	37.6391	5.79505		993.903	30.6271	3.08149	32.6957	3.27394
UK013	UK013_87	NA	5360	77600	476	16.1905	NA	NA	5.92066	3.1354	0.0743	6.01232	NA	NA	1.73029	6.78076	0.1689	3.1354	-0.060093	NA	NA	1049.63	121.424	122.488	1006.05	29.2057	31.4156	1019.86	43.6603	44.6837	NA	NA	NA	60.9678	4.15194		1006.05	29.2057	2.90301	31.4156	3.10916
UK013	UK013_632	NA	1850	25000	192.2	3.82107	NA	NA	5.91017	3.45222	0.0702	8.10965	NA	NA	1.63772	8.81386	0.1692	3.45222	0.19709	NA	NA	934.209	166.975	167.784	1007.7	32.2056	34.2283	984.834	55.6213	56.3972	NA	NA	NA	43.0872	-7.86688		1007.7	32.2056	3.19595	34.2283	3.41267
UK013	UK013_233	NA	6780	97400	756	3.87494	NA	NA	5.87544	3.17898	0.0709	5.7265	NA	NA	1.66382	6.54971	0.1702	3.17898	0.1834	NA	NA	954.532	117.321	118.454	1013.21	29.8064	32.0024	994.834	41.562	42.6052	NA	NA	NA	42.7036	-6.14766		1013.21	29.8064	2.94177	32.0024	3.17648
UK013	UK013_72	NA	2420	33000	205	2.40893	NA	NA	5.83431	3.35913	0.0718	7.02155	NA	NA	1.69682	7.7837	0.1714	3.35913	0.43347	NA	NA	980.277	143.415	144.339	1019.82	31.6851	33.7834	1007.34	49.7677	50.6558	NA	NA	NA	58.5163	-4.0339		1019.82	31.6851	3.10693	33.7834	3.31909
UK013	UK013_239	NA	2140	27750	220.4	2.89619	NA	NA	5.82751	3.23784	0.0755	6.72967	NA	NA	1.78635	7.46806	0.1716	3.23784	0.10048	NA	NA	1081.84	135.322	136.27	1020.92	30.5713	32.7453	1040.49	48.652	49.5944	NA	NA	NA	47.7014	5.63135		1020.92	30.5713	2.99449	32.7453	3.19172
UK013	UK013_596	NA	2490	33900	234.2	1.32466	NA	NA	5.82072	3.59067	0.0732	6.94434	NA	NA	1.73395	7.81772	0.1718	3.59067	0.12745	NA	NA	1019.49	140.981	141.91	1022.02	33.9365	35.9112	1021.22	50.3863	51.2777	NA	NA	NA	97.7502	-0.247789		1022.02	33.9365	3.32053	35.9112	3.51453
UK013	UK013_560	NA	1810	25060	179.5	1.52896	NA	NA	5.81395	3.30623	0.0746	7.00764	NA	NA	1.76917	7.74843	0.172	3.30623	0.30604	NA	NA	1057.74	141.452	142.367	1023.12	31.2792	33.4153	1034.21	50.3058	51.2117	NA	NA	NA	66.106	3.27331		1023.12	31.2792	3.05723	33.4153	3.25925
UK013	UK013_546	NA	4820	64700	482	1.22959	NA	NA	5.7971	3.28064	0.0752	5.8669	NA	NA	1.78858	6.72184	0.1725	3.28064	0.36894	NA	NA	1073.85	118.045	119.131	1025.87	31.1141	33.2711	1041.31	43.8039	44.8485	NA	NA	NA	47.8238	4.46813		1025.87	31.1141	3.03294	33.2711	3.23148
UK013	UK013_408	NA	6280	87200	689	2.76707	NA	NA	5.78369	3.08424	0.0726	5.73301	NA	NA	1.73074	6.50999	0.1729	3.08424	0.3457	NA	NA	1002.81	116.588	117.711	1028.07	29.3091	31.5984	1020.03	41.9188	42.9837	NA	NA	NA	70.1224	-2.51905		1028.07	29.3091	2.85089	31.5984	3.07957
UK013	UK013_137	NA	987	12700	73.2	3.06276	NA	NA	5.75374	3.51687	0.0755	7.67042	NA	NA	1.80925	8.43823	0.1738	3.51687	0.089446	NA	NA	1081.84	154.352	155.187	1033.01	33.5687	35.6024	1048.81	55.2354	56.0755	NA	NA	NA	61.1837	4.51349		1033.01	33.5687	3.24959	35.6024	3.43353
UK013	UK013_264	NA	6340	91100	717	3.21525	NA	NA	5.74713	3.28766	0.0694	5.80391	NA	NA	1.66498	6.67039	0.174	3.28766	0.57773	NA	NA	910.653	119.726	120.852	1034.11	31.4116	33.5803	995.276	42.3397	43.3648	NA	NA	NA	2.56077	-13.5573		1034.11	31.4116	3.03754	33.5803	3.27223
UK013	UK013_530	NA	821	11250	83.4	1.84106	NA	NA	5.73723	3.97229	0.0758	8.41253	NA	NA	1.82166	9.30321	0.1743	3.97229	0.1151	NA	NA	1089.79	169.193	169.955	1035.76	38.0087	39.8249	1053.28	61.0589	61.8242	NA	NA	NA	60.8217	4.95814		1035.76	38.0087	3.66964	39.8249	3.82882
UK013	UK013_244	NA	5020	63660	493.7	1.17046	NA	NA	5.72082	3.13471	0.0782	6.20677	NA	NA	1.88473	6.95344	0.1748	3.13471	0.086416	NA	NA	1151.96	123.471	124.487	1038.5	30.0675	32.3436	1075.73	46.1608	47.1905	NA	NA	NA	16.2782	9.84887		1038.5	30.0675	2.89527	32.3436	3.08446
UK013	UK013_273	NA	4850	66300	519	5.35052	NA	NA	5.71755	3.26194	0.0715	6.18421	NA	NA	1.72424	6.99176	0.1749	3.26194	0.30298	NA	NA	971.742	126.401	127.449	1039.05	31.3031	33.4974	1017.61	44.9627	45.9547	NA	NA	NA	35.1821	-6.92675		1039.05	31.3031	3.01266	33.4974	3.24164
UK013	UK013_550	NA	2520	32400	231.5	1.03626	NA	NA	5.69801	3.36888	0.0789	6.84456	NA	NA	1.90922	7.62872	0.1755	3.36888	0.7295	NA	NA	1169.63	135.866	136.787	1042.34	32.4236	34.5589	1084.31	50.8773	51.8222	NA	NA	NA	1.98213	10.8824		1042.34	32.4236	3.11065	34.5589	3.33654
UK013	UK013_298	NA	6850	96100	667	6.45692	NA	NA	5.69152	3.27089	0.0704	5.83354	NA	NA	1.70548	6.68796	0.1757	3.27089	0.59396	NA	NA	940.042	119.791	120.906	1043.44	31.511	33.7082	1010.59	42.8335	43.8652	NA	NA	NA	5.74643	-10.9993		1043.44	31.511	3.01991	33.7082	3.24896
UK013	UK013_146	NA	9150	125600	720	4.60653	NA	NA	5.66572	3.19495	0.0733	5.52835	NA	NA	1.78382	6.38517	0.1765	3.19495	0.6415	NA	NA	1022.26	112.079	113.239	1047.83	30.8985	33.1531	1039.57	41.5675	42.6646	NA	NA	NA	60.6562	-2.50102		1047.83	30.8985	2.94882	33.1531	3.16734
UK013	UK013_479	NA	7020	92500	731	2.0767	NA	NA	5.63063	3.13873	0.0776	5.66446	NA	NA	1.90023	6.47593	0.1776	3.13873	0.30679	NA	NA	1136.65	112.898	114.012	1053.85	30.5155	32.8198	1081.17	43.1089	44.2155	NA	NA	NA	22.2876	7.28467		1053.85	30.5155	2.89562	32.8198	3.09374
UK013	UK013_194	NA	3290	42470	283.4	1.97079	NA	NA	5.60538	3.17222	0.0764	6.65985	NA	NA	1.87927	7.37676	0.1784	3.17222	0.21843	NA	NA	1105.57	133.438	134.392	1058.23	30.959	33.2494	1073.81	48.9258	49.8969	NA	NA	NA	54.9627	4.28227		1058.23	30.959	2.92556	33.2494	3.13144
UK013	UK013_293	NA	4770	63700	435	1.40777	NA	NA	5.59284	3.3193	0.0763	6.14345	NA	NA	1.88102	6.98281	0.1788	3.3193	0.35054	NA	NA	1102.95	123.095	124.129	1060.42	32.4561	34.6558	1074.42	46.3243	47.3491	NA	NA	NA	54.6665	3.85667		1060.42	32.4561	3.0607	34.6558	3.2578
UK013	UK013_350	NA	4480	59700	358	1.49167	NA	NA	5.56174	3.18802	0.0805	6.40869	NA	NA	1.99566	7.15785	0.1798	3.18802	0.35612	NA	NA	1209.26	126.443	127.419	1065.88	31.3201	33.6151	1114.04	48.4547	49.4755	NA	NA	NA	4.53376	11.857		1065.88	31.3201	2.93843	33.6151	3.12864
UK013	UK013_388	NA	11360	153100	1083	20.1676	NA	NA	5.55556	3.1351	0.0728	5.22274	NA	NA	1.80678	6.09146	0.18	3.1351	0.34759	NA	NA	1008.39	106.088	107.317	1066.97	30.8293	33.1625	1047.91	39.8356	40.9892	NA	NA	NA	35.062	-5.80965		1066.97	30.8293	2.88941	33.1625	3.12592
UK013	UK013_638	NA	5260	71100	512.4	3.3578	NA	NA	5.55247	3.17812	0.0728	6.21926	NA	NA	1.80778	6.98424	0.1801	3.17812	0.70703	NA	NA	1008.39	126.409	127.445	1067.52	31.2671	33.572	1048.28	45.6904	46.7007	NA	NA	NA	22.8884	-5.86383		1067.52	31.2671	2.92894	33.572	3.14415
UK013	UK013_56	NA	5650	74800	444	2.07477	NA	NA	5.54631	3.14283	0.0721	5.74743	NA	NA	1.79239	6.5506	0.1803	3.14283	0.35981	NA	NA	988.765	117.133	118.256	1068.61	30.949	33.2801	1042.69	42.7192	43.7913	NA	NA	NA	22.2474	-8.0756		1068.61	30.949	2.89618	33.2801	3.13521
UK013	UK013_162	NA	4570	64000	363.5	2.915	NA	NA	5.52792	3.18579	0.0687	6.18108	NA	NA	1.71355	6.95377	0.1809	3.18579	-0.46103	NA	NA	889.745	127.957	129.019	1071.89	31.4604	33.7688	1013.61	44.6158	45.6108	NA	NA	NA	7.16278	-20.4715		1071.89	31.4604	2.93504	33.7688	3.21882
UK013	UK013_625	NA	244	3380	23.9	2.34544	NA	NA	5.52486	5.56394	0.066	11.3691	NA	NA	1.64711	12.6575	0.181	5.56394	0.50308	NA	NA	806.376	239.733	240.329	1072.44	54.9718	56.326	988.445	80.1366	80.6817	NA	NA	NA	1.45735	-32.9945		1072.44	54.9718	5.12588	56.326	5.33923
UK013	UK013_591	NA	1720	24500	160	2.15343	NA	NA	5.50661	3.21307	0.0696	7.29187	NA	NA	1.74271	7.96838	0.1816	3.21307	0.36978	NA	NA	916.575	150.445	151.344	1075.71	31.8337	34.1313	1024.47	51.4538	52.3304	NA	NA	NA	3.50615	-17.3618		1075.71	31.8337	2.95932	34.1313	3.2014
UK013	UK013_136	NA	1989	26910	153.1	2.55593	NA	NA	5.47645	3.28405	0.0742	6.96307	NA	NA	1.86813	7.69865	0.1826	3.28405	-0.10523	NA	NA	1046.91	140.777	141.699	1081.16	32.6885	34.9501	1069.87	50.9585	51.888	NA	NA	NA	72.0627	-3.27159		1081.16	32.6885	3.02345	34.9501	3.24323
UK013	UK013_62	NA	2970	39500	231.2	2.1487	NA	NA	5.4615	3.42864	0.0704	6.50268	NA	NA	1.77731	7.35122	0.1831	3.42864	0.30554	NA	NA	940.042	133.592	134.595	1083.89	34.2067	36.3839	1037.2	47.8023	48.7575	NA	NA	NA	5.64783	-15.302		1083.89	34.2067	3.15593	36.3839	3.39942
UK013	UK013_371	NA	2160	27830	185	1.78917	NA	NA	5.4407	3.21789	0.0784	7.07457	NA	NA	1.98684	7.77203	0.1838	3.21789	0.41374	NA	NA	1157.03	140.716	141.609	1087.7	32.2077	34.5256	1111.05	52.5415	53.4821	NA	NA	NA	34.4025	5.99181		1087.7	32.2077	2.96108	34.5256	3.16524
UK013	UK013_77	NA	2021	27130	155.1	1.39982	NA	NA	5.42594	3.27903	0.074	6.81055	NA	NA	1.88044	7.55881	0.1843	3.27903	0.31645	NA	NA	1041.47	137.791	138.734	1090.42	32.8951	35.1778	1074.22	50.146	51.0945	NA	NA	NA	51.8902	-4.70063		1090.42	32.8951	3.01673	35.1778	3.23694
UK013	UK013_590	NA	3950	55400	354.1	2.90246	NA	NA	5.37924	3.20358	0.0694	6.30306	NA	NA	1.77885	7.07046	0.1859	3.20358	0.16226	NA	NA	910.653	130.067	131.105	1099.13	32.3734	34.7234	1037.76	45.9885	46.981	NA	NA	NA	1.61633	-20.6965		1099.13	32.3734	2.94538	34.7234	3.21655
UK013	UK013_51	NA	788	9750	54.8	1.90941	NA	NA	5.31632	3.38256	0.0782	9.51595	NA	NA	2.02813	10.0993	0.1881	3.38256	0.18708	NA	NA	1151.96	189.829	190.498	1111.07	34.5226	36.7783	1124.99	68.7867	69.5195	NA	NA	NA	69.5936	3.54914		1111.07	34.5226	3.10714	36.7783	3.30413
UK013	UK013_529	NA	2930	35530	239	1.04276	NA	NA	5.29942	3.24602	0.0847	6.99047	NA	NA	2.20372	7.70736	0.1887	3.24602	-0.15696	NA	NA	1308.68	136.03	136.914	1114.33	33.218	35.5687	1182.22	53.8821	54.8629	NA	NA	NA	4.78983	14.8509		1114.33	33.218	2.98099	35.5687	3.13639
UK013	UK013_555	NA	12710	164100	1082	3.76872	NA	NA	5.29942	3.07067	0.0799	5.25884	NA	NA	2.07883	6.08969	0.1887	3.07067	0.23209	NA	NA	1194.52	103.905	105.092	1114.33	31.4235	33.8988	1141.85	41.7738	42.9844	NA	NA	NA	23.4934	6.71329		1114.33	31.4235	2.81995	33.8988	3.01878
UK013	UK013_453	NA	3120	41720	310.7	0.977044	NA	NA	5.29101	3.16204	0.0743	6.56895	NA	NA	1.93621	7.29038	0.189	3.16204	0.54566	NA	NA	1049.63	132.716	133.692	1115.96	32.4018	34.8139	1093.69	48.8517	49.8442	NA	NA	NA	27.6901	-6.31921		1115.96	32.4018	2.9035	34.8139	3.12729
UK013	UK013_223	NA	2440	31700	217.3	3.63378	NA	NA	5.24109	3.28192	0.0813	7.07236	NA	NA	2.1388	7.79675	0.1908	3.28192	0.31618	NA	NA	1228.71	139.211	140.095	1125.71	33.8992	36.2476	1161.44	53.9957	54.9563	NA	NA	NA	18.9778	8.38268		1125.71	33.8992	3.01137	36.2476	3.20129
UK013	UK013_606	NA	1430	18260	114.5	1.3041	NA	NA	5.21376	3.26866	0.0761	7.63993	NA	NA	2.01249	8.30979	0.1918	3.26866	-0.19372	NA	NA	1097.7	153.37	154.206	1131.12	33.9107	36.2784	1119.73	56.4255	57.3103	NA	NA	NA	74.8401	-3.04419		1131.12	33.9107	2.99798	36.2784	3.21708
UK013	UK013_289	NA	1750	23800	158	0.759615	NA	NA	5.15198	3.86739	0.0714	7.5329	NA	NA	1.91084	8.46766	0.1941	3.86739	-0.16112	NA	NA	968.887	154.192	155.057	1143.55	40.5254	42.5658	1084.88	56.4999	57.3534	NA	NA	NA	11.1782	-18.0269		1143.55	40.5254	3.54383	42.5658	3.79479
UK013	UK013_157	NA	3750	46400	243	4.71845	NA	NA	5.07099	3.70508	0.0783	6.53806	NA	NA	2.12897	7.51491	0.1972	3.70508	0.2919	NA	NA	1154.5	130.042	131.007	1160.26	39.3425	41.4961	1158.25	51.9638	52.9581	NA	NA	NA	94.1983	-0.499408		1160.26	39.3425	3.39083	41.4961	3.57838
UK013	UK013_588	NA	3560	43680	262.6	2.9807	NA	NA	5.04541	3.30293	0.0792	6.43834	NA	NA	2.16436	7.23613	0.1982	3.30293	0.3518	NA	NA	1177.14	127.625	128.602	1165.64	35.2206	37.6306	1169.67	50.2962	51.3333	NA	NA	NA	87.2632	0.97647		1165.64	35.2206	3.02156	37.6306	3.2256
UK013	UK013_131	NA	2840	37920	198	1.45374	NA	NA	4.95295	3.2528	0.077	6.78448	NA	NA	2.14352	7.52395	0.2019	3.2528	0.10342	NA	NA	1121.19	135.632	136.567	1185.52	35.2248	37.7075	1162.96	52.1398	53.1351	NA	NA	NA	44.8141	-5.7376		1185.52	35.2248	2.97126	37.7075	3.19893
UK013	UK013_112	NA	4210	51500	256.1	2.77766	NA	NA	4.74608	3.09883	0.0861	6.28957	NA	NA	2.50132	7.01152	0.2107	3.09883	-0.28775	NA	NA	1340.43	121.787	122.763	1232.55	34.7655	37.4563	1272.42	50.903	52.0203	NA	NA	NA	25.4096	8.04837		1232.55	34.7655	2.82062	37.4563	3.00489
UK013	UK013_384	NA	2420	27670	148.2	1.69178	NA	NA	4.23908	3.4226	0.0849	7.41813	NA	NA	2.76145	8.16963	0.2359	3.4226	0.040801	NA	NA	1313.26	144.305	145.138	1365.35	42.1139	44.8036	1345.18	60.9727	61.962	NA	NA	NA	57.6966	-3.96658		1313.26	144.305	10.9883	145.138	10.6809
UK013	UK013_314	NA	3150	34900	158.1	2.71649	NA	NA	4.10004	3.5082	0.0851	6.5985	NA	NA	2.86182	7.47313	0.2439	3.5082	0.30191	NA	NA	1317.82	128.201	129.136	1406.94	44.3441	47.0436	1371.92	56.2895	57.3789	NA	NA	NA	24.1237	-6.76284		1317.82	128.201	9.7283	129.136	9.25872
UK013	UK013_65	NA	3360	34320	123.6	2.07383	NA	NA	3.4153	3.31554	0.0923	6.64594	NA	NA	3.72627	7.42706	0.2928	3.31554	0.34047	NA	NA	1473.57	126.383	127.291	1655.51	48.4083	51.6964	1577.03	59.5251	60.6916	NA	NA	NA	1.09341	-12.347		1473.57	126.383	8.57669	127.291	7.82977
UK013	UK013_377	NA	24440	249500	1119	2.24699	NA	NA	3.59066	3.10986	0.099	4.70475	NA	NA	3.80156	5.63967	0.2785	3.10986	0.75426	NA	NA	1605.37	87.8221	89.0738	1583.8	43.6707	47.0278	1593.08	45.3682	46.898	NA	NA	NA	55.3325	1.34314		1605.37	87.8221	5.47053	89.0738	5.61049
UK013	UK013_54	NA	13170	126900	431	2.19004	NA	NA	3.20307	3.17353	0.1012	5.29174	NA	NA	4.35627	6.1704	0.3122	3.17353	0.32185	NA	NA	1646.24	98.2871	99.3967	1751.52	48.6745	52.2728	1704.08	50.9988	52.4398	NA	NA	NA	10.0222	-6.39541		1646.24	98.2871	5.9704	99.3967	5.75012
UK013	UK013_463	NA	6520	60900	303.4	3.62485	NA	NA	3.53857	3.07671	0.1035	6.02447	NA	NA	4.03287	6.76464	0.2826	3.07671	0.23613	NA	NA	1687.81	111.349	112.321	1604.44	43.7012	47.1307	1640.85	55.0933	56.3918	NA	NA	NA	24.1181	4.93946		1687.81	111.349	6.59723	112.321	6.94695
UK013	UK013_411	NA	11090	105800	513	1.35	NA	NA	3.51247	3.21405	0.1061	5.30427	NA	NA	4.1649	6.20205	0.2847	3.21405	0.24999	NA	NA	1733.46	97.4352	98.5299	1614.99	45.916	49.2281	1667.14	50.8242	52.2457	NA	NA	NA	8.11384	6.83409		1733.46	97.4352	5.62086	98.5299	6.0202
UK013	UK013_485	NA	5660	53000	230.6	2.40459	NA	NA	3.14169	3.16206	0.1094	5.95658	NA	NA	4.80126	6.74384	0.3183	3.16206	0.11327	NA	NA	1789.45	108.696	109.666	1781.42	49.2174	52.8813	1785.12	56.7312	58.0766	NA	NA	NA	91.6759	0.448386		1789.45	108.696	6.0743	109.666	6.15076
UK013	UK013_227	NA	2780	26550	110.7	3.9395	NA	NA	3.16656	3.30536	0.1104	7.02128	NA	NA	4.80709	7.7604	0.3158	3.30536	0.038358	NA	NA	1806	127.949	128.773	1769.19	51.1409	54.6354	1786.14	65.3185	66.4925	NA	NA	NA	67.7653	2.03871		1806	127.949	7.08466	128.773	7.25284
UK013	UK013_46	NA	11550	104700	344	7.18163	NA	NA	3.14465	3.81211	0.1119	5.2834	NA	NA	4.90635	6.51509	0.318	3.81211	0.9376	NA	NA	1830.5	95.8922	96.9781	1779.95	59.2935	62.3641	1803.35	55.0066	56.403	NA	NA	NA	2.30282	2.76141		1830.5	95.8922	5.23858	96.9781	5.37307
UK013	UK013_24	NA	3580	32730	112.6	0.895784	NA	NA	3.44353	3.43075	0.1127	6.59155	NA	NA	4.51255	7.43092	0.2904	3.43075	0.15267	NA	NA	1843.4	119.536	120.409	1643.53	49.7724	52.9365	1733.29	61.8413	63.0522	NA	NA	NA	1.58718	10.8428		1843.4	119.536	6.48454	120.409	7.1896
UK013	UK013_361	NA	10430	95500	351	4.00685	NA	NA	3.20307	3.38311	0.1151	5.43376	NA	NA	4.95461	6.40087	0.3122	3.38311	0.44352	NA	NA	1881.45	98.0221	99.0719	1751.52	51.8892	55.2786	1811.61	54.1298	55.5527	NA	NA	NA	3.30457	6.90566		1881.45	98.0221	5.20992	99.0719	5.57333
UK013	UK013_451	NA	5160	44910	192.6	1.02447	NA	NA	3.003	3.17683	0.1166	6.14414	NA	NA	5.35358	6.91684	0.333	3.17683	0.16858	NA	NA	1904.74	110.571	111.499	1852.91	51.1605	54.935	1877.46	59.2456	60.5823	NA	NA	NA	49.3275	2.72144		1904.74	110.571	5.80506	111.499	5.98535
UK013	UK013_581	NA	9340	78100	281.3	1.32626	NA	NA	3.07125	3.18478	0.1172	5.40043	NA	NA	5.26154	6.26957	0.3256	3.18478	0.6878	NA	NA	1913.96	97.041	98.0931	1817.02	50.4288	54.1313	1862.65	53.5429	55.0091	NA	NA	NA	2.78379	5.06478		1913.96	97.041	5.07018	98.0931	5.35012
UK013	UK013_379	NA	3820	31230	103.2	0.408551	NA	NA	2.68528	3.21246	0.1207	6.19478	NA	NA	6.19752	6.9782	0.3724	3.21246	-0.11902	NA	NA	1966.6	110.673	111.586	2040.68	56.1947	60.2522	2004.1	61.0846	62.4391	NA	NA	NA	40.2141	-3.76727		1966.6	110.673	5.62762	111.586	5.51458
UK013	UK013_364	NA	6240	54100	192.3	1.11672	NA	NA	3.03398	3.2813	0.1208	6.06428	NA	NA	5.48979	6.8951	0.3296	3.2813	0.060461	NA	NA	1968.07	108.314	109.247	1836.44	52.4372	56.0713	1899	59.291	60.637	NA	NA	NA	10.6001	6.6883		1968.07	108.314	5.50356	109.247	5.86499
UK013	UK013_562	NA	2980	25060	89.4	0.807588	NA	NA	2.97619	3.34627	0.1219	6.68753	NA	NA	5.64734	7.478	0.336	3.34627	0.31658	NA	NA	1984.22	119.265	120.111	1867.4	54.2528	57.8726	1923.36	64.5947	65.8441	NA	NA	NA	11.3228	5.88759		1984.22	119.265	6.01068	120.111	6.36463
UK013	UK013_436	NA	7220	57960	213	2.111	NA	NA	2.59943	3.19493	0.1301	5.58443	NA	NA	6.90082	6.43377	0.3847	3.19493	0.53292	NA	NA	2099.31	98.2234	99.2197	2098.2	57.2212	61.3968	2098.76	57.1191	58.6058	NA	NA	NA	98.378	0.0529665		2099.31	98.2234	4.67883	99.2197	4.72816
UK013	UK013_42	NA	5630	39700	95.5	1.66667	NA	NA	2.33645	3.26139	0.145	5.93806	NA	NA	8.55683	6.77475	0.428	3.26139	0.26702	NA	NA	2287.78	102.327	103.245	2296.7	63.016	67.435	2291.98	61.6674	63.1173	NA	NA	NA	90.0473	-0.38977		2287.78	102.327	4.47275	103.245	4.50016
UK013	UK013_93	NA	27900	194200	482	1.18719	NA	NA	2.36128	3.10385	0.1505	4.70092	NA	NA	8.78802	5.63316	0.4235	3.10385	0.048329	NA	NA	2351.61	80.4162	81.5639	2276.35	59.5289	64.1222	2316.25	51.3984	53.1361	NA	NA	NA	29.9467	3.20061		2351.61	80.4162	3.41962	81.5639	3.54772
UK013	UK013_544	NA	37160	130500	251.2	3.81763	NA	NA	1.52439	3.09363	0.2852	4.5112	NA	NA	25.7961	5.47005	0.656	3.09363	0.30325	NA	NA	3391.63	70.3428	71.432	3251.6	79.0046	85.1399	3338.84	53.5187	55.4361	NA	NA	NA	3.0755	4.1286		3391.63	70.3428	2.07401	71.432	2.15387
UK013	UK013_5	NA	1260	15100	726	1.80597	NA	NA	47.3037	3.48225	0.081	10.5371	NA	NA	0.236097	11.0976	0.02114	3.48225	-0.070574	NA	NA	NA	NA	NA	134.857	4.64726	4.93427	215.22	21.5259	21.7154	NA	NA	NA	3.72911e-10	NA
UK013	UK013_7	NA	77	1130	103.6	1.59877	NA	NA	86.9565	6.00868	0.067	19.7727	NA	NA	0.106237	20.6655	0.0115	6.00868	0.3506	NA	NA	NA	NA	NA	73.7107	4.40382	4.497	102.517	20.1539	20.2052	NA	NA	NA	0.290517	NA
UK013	UK013_18	NA	170	2500	176	1.50427	NA	NA	69.735	3.7352	0.062	13.1351	NA	NA	0.122586	13.6559	0.01434	3.7352	0.31205	NA	NA	NA	NA	NA	91.785	3.40406	3.58748	117.414	15.1427	15.2309	NA	NA	NA	0.0461972	NA
UK013	UK013_22	NA	112	1780	118.9	1.16798	NA	NA	64.9351	6.27174	0.074	18.137	NA	NA	0.157128	19.1908	0.0154	6.27174	-0.080664	NA	NA	NA	NA	NA	98.5181	6.13183	6.25102	148.186	26.4663	26.5445	NA	NA	NA	0.0434433	NA
UK013	UK013_27	NA	96	1620	121.6	1.2733	NA	NA	73.2601	4.26595	0.062	16.711	NA	NA	0.116688	17.2469	0.01365	4.26595	0.22806	NA	NA	NA	NA	NA	87.3984	3.70321	3.85711	112.065	18.3013	18.3682	NA	NA	NA	0.625421	NA
UK013	UK013_28	NA	12300	28800	1018	3.38656	NA	NA	34.3643	4.8191	0.438	5.66523	NA	NA	1.75739	7.43765	0.0291	4.8191	0.94628	NA	NA	NA	NA	NA	184.913	8.78455	9.07187	1029.89	48.1683	49.1088	NA	NA	NA	2.40497e-143	NA
UK013	UK013_34	NA	147	2560	231	1.26714	NA	NA	87.6424	5.19497	0.064	17.372	NA	NA	0.100685	18.1321	0.01141	5.19497	-0.18687	NA	NA	NA	NA	NA	73.1371	3.77798	3.88455	97.4089	16.8431	16.8988	NA	NA	NA	0.737571	NA
UK013	UK013_35	NA	12850	68500	145.4	1.6504	NA	NA	2.07039	3.37542	0.1968	5.17334	NA	NA	13.1061	6.17713	0.483	3.37542	0.62699	NA	NA	2799.84	84.7317	85.7318	2540.32	70.8712	75.5212	2687.32	58.3392	59.9849	NA	NA	NA	2.39282e-05	9.26913
UK013	UK013_41	NA	4790	59800	346	1.20642	NA	NA	5.51572	3.19437	0.0819	6.05106	NA	NA	2.04731	6.84246	0.1813	3.19437	0.57058	NA	NA	1243.13	118.777	119.805	1074.07	31.6042	33.9111	1131.4	46.7106	47.7863	NA	NA	NA	0.376235	13.5991
UK013	UK013_55	NA	72	815	54.1	1.55504	NA	NA	63.2911	5.60663	0.084	15.055	NA	NA	0.182994	16.0651	0.0158	5.60663	0.51104	NA	NA	NA	NA	NA	101.057	5.62171	5.75812	170.634	25.2381	25.3445	NA	NA	NA	4.99896e-07	NA
UK013	UK013_78	NA	281	3060	71.1	1.40792	NA	NA	21.3675	4.46287	0.086	14.2879	NA	NA	0.554939	14.9686	0.0468	4.46287	0.013719	NA	NA	NA	NA	NA	294.845	12.8622	13.3514	448.227	54.2947	54.5585	NA	NA	NA	2.51611e-05	NA
UK013	UK013_85	NA	3490	47000	339	2.25249	NA	NA	6.9541	3.43021	0.0798	6.64682	NA	NA	1.58221	7.47974	0.1438	3.43021	0.43085	NA	NA	1192.05	131.491	132.436	866.115	27.8003	29.5682	963.237	46.5686	47.4677	NA	NA	NA	0.00120635	27.3424
UK013	UK013_86	NA	232	3290	148.9	1.45837	NA	NA	43.1034	4.24962	0.072	13.4583	NA	NA	0.230315	14.1133	0.0232	4.24962	-0.030543	NA	NA	NA	NA	NA	147.848	6.21149	6.47158	210.458	26.8327	26.9791	NA	NA	NA	0.00110735	NA
UK013	UK013_89	NA	1200	17900	359	2.20787	NA	NA	19.3424	3.25059	0.0691	8.33832	NA	NA	0.492572	8.94952	0.0517	3.25059	0.35559	NA	NA	NA	NA	NA	324.95	10.301	11.028	406.662	29.9979	30.4033	NA	NA	NA	2.17813e-06	NA
UK013	UK013_96	NA	6300	88100	574	1.53067	NA	NA	6.23053	3.46745	0.0769	6.04341	NA	NA	1.70178	6.9675	0.1605	3.46745	0.60313	NA	NA	1118.6	120.802	121.85	959.555	30.9145	32.8396	1009.2	44.5901	45.5808	NA	NA	NA	0.654941	14.218
UK013	UK013_106	NA	13290	61600	112.2	1.03793	NA	NA	1.76056	3.20878	0.2335	5.19557	NA	NA	18.2867	6.10658	0.568	3.20878	0.47127	NA	NA	3076.19	83.0785	84.0507	2899.6	74.9342	80.357	3004.94	58.856	60.5544	NA	NA	NA	0.267931	5.74057
UK013	UK013_108	NA	633	11100	200	1.29955	NA	NA	17.8571	3.68313	0.0644	9.16085	NA	NA	0.49725	9.87353	0.056	3.68313	-0.38431	NA	NA	NA	NA	NA	351.253	12.591	13.2882	409.839	33.3073	33.6775	NA	NA	NA	0.390614	NA
UK013	UK013_113	NA	2990	41520	373.6	3.72483	NA	NA	8.65052	3.15874	0.0753	7.1528	NA	NA	1.2002	7.81922	0.1156	3.15874	0.0794	NA	NA	1076.52	143.991	144.885	705.189	21.1	22.6739	800.679	43.336	44.102	NA	NA	NA	0.00742136	34.4937
UK013	UK013_116	NA	61520	410400	1126	3.92061	NA	NA	2.65322	3.14653	0.1555	4.21859	NA	NA	8.08086	5.26281	0.3769	3.14653	0.58193	NA	NA	2407.31	71.7366	73.0053	2061.79	55.5244	59.6974	2240.11	47.5878	49.4263	NA	NA	NA	1.01782e-11	14.353
UK013	UK013_122	NA	2730	30730	182.8	1.34511	NA	NA	5.7241	3.21922	0.0903	6.82275	NA	NA	2.17511	7.54409	0.1747	3.21922	0.4181	NA	NA	1431.88	130.498	131.388	1037.96	30.863	33.0824	1173.12	52.5227	53.52	NA	NA	NA	1.30213e-05	27.5111
UK013	UK013_128	NA	431	7540	323	1.46154	NA	NA	41.6667	3.45977	0.0572	8.80458	NA	NA	0.189282	9.45995	0.024	3.45977	0.27727	NA	NA	NA	NA	NA	152.887	5.22729	5.5542	176.016	15.2889	15.4738	NA	NA	NA	0.188157	NA
UK013	UK013_141	NA	91	1570	111.8	1.33413	NA	NA	67.5676	5.59221	0.062	14.2416	NA	NA	0.126519	15.3002	0.0148	5.59221	0.58049	NA	NA	NA	NA	NA	94.7078	5.25754	5.38577	120.965	17.4496	17.5306	NA	NA	NA	0.0579402	NA
UK013	UK013_143	NA	1123	18120	858	3.20388	NA	NA	45.6621	3.76612	0.062	7.35915	NA	NA	0.187213	8.26685	0.0219	3.76612	0.47897	NA	NA	NA	NA	NA	139.653	5.20293	5.47881	174.249	13.2374	13.4467	NA	NA	NA	5.97831e-07	NA
UK013	UK013_148	NA	140	2530	110.1	1.14568	NA	NA	42.5532	5.19877	0.064	16.0958	NA	NA	0.207372	16.9145	0.0235	5.19877	-0.021017	NA	NA	NA	NA	NA	149.738	7.69484	7.91158	191.345	29.5067	29.6189	NA	NA	NA	0.763537	NA
UK013	UK013_170	NA	150	3260	137.4	1.43874	NA	NA	40.6504	4.41875	0.0401	14.206	NA	NA	0.136013	14.8774	0.0246	4.41875	0.54543	NA	NA	NA	NA	NA	156.663	6.83909	7.10436	129.487	18.0884	18.1772	NA	NA	NA	0.0354338	NA
UK013	UK013_171	NA	663	13160	295.6	1.68433	NA	NA	20.9205	3.53877	0.047	8.14339	NA	NA	0.309761	8.87906	0.0478	3.53877	0.37619	NA	NA	NA	NA	NA	301.001	10.4069	11.0298	273.996	21.3253	21.618	NA	NA	NA	0.60366	NA
UK013	UK013_177	NA	1404	30520	1411	1.78834	NA	NA	42.9553	3.23801	0.0415	7.49136	NA	NA	0.133209	8.1612	0.02328	3.23801	0.078766	NA	NA	NA	NA	NA	148.352	4.74881	5.08646	126.977	9.74136	9.89936	NA	NA	NA	0.00408686	NA
UK013	UK013_182	NA	3080	53600	710	3.4151	NA	NA	11.5875	3.28033	0.0526	6.40862	NA	NA	0.62589	7.19937	0.0863	3.28033	0.70005	NA	NA	311.581	146.23	147.36	533.618	16.7995	17.9644	493.532	28.1477	28.7333	NA	NA	NA	0.00522579	-71.2611
UK013	UK013_183	NA	262	6890	584	1.59563	NA	NA	76.746	3.84875	0.0361	13.4581	NA	NA	0.0648564	13.9977	0.01303	3.84875	-0.0241	NA	NA	NA	NA	NA	83.4542	3.19124	3.35344	63.8066	8.65681	8.70479	NA	NA	NA	0.00206795	NA
UK013	UK013_185	NA	6060	81500	504.6	1.67086	NA	NA	5.50661	3.32168	0.0686	5.93476	NA	NA	1.71768	6.80109	0.1816	3.32168	0.4256	NA	NA	886.736	122.895	124.001	1075.71	32.9098	35.1371	1015.16	43.6737	44.6914	NA	NA	NA	0.343464	-21.3112
UK013	UK013_186	NA	172	3580	300	5.30973	NA	NA	72.6216	3.70398	0.04	15.3178	NA	NA	0.0759443	15.7593	0.01377	3.70398	0.46806	NA	NA	NA	NA	NA	88.1615	3.24326	3.42089	74.3247	11.2951	11.3445	NA	NA	NA	0.619429	NA
UK013	UK013_198	NA	2660	35200	332.5	4.25192	NA	NA	7.96813	3.49189	0.0778	6.69413	NA	NA	1.34625	7.55014	0.1255	3.49189	0.33076	NA	NA	1141.77	133.41	134.355	762.143	25.1003	26.6422	865.936	44.0157	44.8498	NA	NA	NA	0.00031167	33.2491
UK013	UK013_201	NA	3000	48080	552	2.41048	NA	NA	9.42507	3.59079	0.0676	6.38465	NA	NA	0.988925	7.32513	0.1061	3.59079	0.65288	NA	NA	856.315	132.889	133.923	650.058	22.204	23.4958	698.172	36.9983	37.7424	NA	NA	NA	0.0850246	24.0865
UK013	UK013_209	NA	1112	15200	119.8	0.956105	NA	NA	6.17665	3.52304	0.083	7.95342	NA	NA	1.85279	8.69877	0.1619	3.52304	0.21727	NA	NA	1269.22	155.755	156.539	967.327	31.6459	33.5566	1064.42	57.4258	58.2482	NA	NA	NA	0.150835	23.7855
UK013	UK013_214	NA	910	15510	451	1.72137	NA	NA	22.3214	3.23931	0.0641	7.95844	NA	NA	0.395947	8.59243	0.0448	3.23931	0.4017	NA	NA	NA	NA	NA	282.517	8.95397	9.59013	338.705	24.7514	25.114	NA	NA	NA	0.000148066	NA
UK013	UK013_216	NA	3280	53800	934	3.08965	NA	NA	13.8122	3.36022	0.0659	6.30853	NA	NA	0.657848	7.14763	0.0724	3.36022	0.50656	NA	NA	NA	NA	NA	450.599	14.6241	15.5919	513.297	28.8064	29.4144	NA	NA	NA	9.85605e-05	NA
UK013	UK013_219	NA	1580	27400	440	7.52137	NA	NA	12.3916	4.09077	0.0628	7.30129	NA	NA	0.69877	8.36919	0.0807	4.09077	0.68125	NA	NA	NA	NA	NA	500.3	19.6921	20.5805	538.056	34.9691	35.5091	NA	NA	NA	0.44343	NA
UK013	UK013_220	NA	1295	16620	126.7	0.907593	NA	NA	5.89275	3.22108	0.0839	7.37361	NA	NA	1.96311	8.04646	0.1697	3.22108	-0.12667	NA	NA	1290.24	143.902	144.743	1010.46	30.1252	32.2891	1102.95	54.1806	55.0861	NA	NA	NA	0.564761	21.6842
UK013	UK013_222	NA	830	13960	457.6	1.06369	NA	NA	25.1256	3.41299	0.0622	9.77686	NA	NA	0.34133	10.3555	0.0398	3.41299	0.26119	NA	NA	NA	NA	NA	251.593	8.42145	8.96222	298.179	26.7632	27.0338	NA	NA	NA	0.0426814	NA
UK013	UK013_229	NA	55	797	63.4	1.3576	NA	NA	60.241	6.1862	0.073	20.5519	NA	NA	0.167083	21.4628	0.0166	6.1862	0.045961	NA	NA	NA	NA	NA	106.132	6.51179	6.64185	156.884	31.2092	31.2829	NA	NA	NA	0.168762	NA
UK013	UK013_235	NA	2660	28840	290.4	2.16555	NA	NA	7.43494	3.18583	0.0905	6.66634	NA	NA	1.67831	7.38848	0.1345	3.18583	0.63467	NA	NA	1436.1	127.419	128.329	813.486	24.3479	26.1343	1000.34	47.0443	47.975	NA	NA	NA	1.19034e-17	43.3546
UK013	UK013_238	NA	12350	124700	885	2.34748	NA	NA	5.28262	3.31936	0.0982	5.3638	NA	NA	2.56309	6.30782	0.1893	3.31936	0.71011	NA	NA	1590.22	100.355	101.458	1117.58	34.0593	36.3676	1290.17	46.1046	47.3514	NA	NA	NA	2.92993e-20	29.7216
UK013	UK013_242	NA	38	504	42.5	2.11443	NA	NA	62.1118	6.06248	0.073	26.2629	NA	NA	0.16205	26.9535	0.0161	6.06248	0.24136	NA	NA	NA	NA	NA	102.961	6.19238	6.32111	152.496	38.1834	38.2407	NA	NA	NA	0.931366	NA
UK013	UK013_248	NA	606	12370	364.9	1.37802	NA	NA	21.3675	3.50392	0.0456	8.40521	NA	NA	0.294247	9.10632	0.0468	3.50392	0.29243	NA	NA	NA	NA	NA	294.845	10.0985	10.7146	261.897	21.0247	21.2991	NA	NA	NA	0.111768	NA
UK013	UK013_255	NA	161	2440	248	1.81022	NA	NA	72.3589	4.16362	0.063	16.8421	NA	NA	0.120047	17.3491	0.01382	4.16362	-0.0014001	NA	NA	NA	NA	NA	88.4794	3.65878	3.81824	115.114	18.883	18.9512	NA	NA	NA	0.622625	NA
UK013	UK013_270	NA	250	4130	356	1.5614	NA	NA	60.6061	4.25887	0.0571	10.9779	NA	NA	0.129904	11.775	0.0165	4.25887	0.50595	NA	NA	NA	NA	NA	105.498	4.45645	4.64225	124.011	13.7467	13.8543	NA	NA	NA	0.249689	NA
UK013	UK013_271	NA	570	8340	255.6	1.44081	NA	NA	22.3214	3.32996	0.067	14.1324	NA	NA	0.413861	14.5194	0.0448	3.32996	0.2145	NA	NA	NA	NA	NA	282.517	9.20454	9.82449	351.652	43.1805	43.4032	NA	NA	NA	0.152007	NA
UK013	UK013_274	NA	599	11470	251.1	1.08186	NA	NA	16.1812	3.75544	0.0487	8.11217	NA	NA	0.414972	8.93928	0.0618	3.75544	0.42315	NA	NA	NA	NA	NA	386.563	14.0905	14.8417	352.449	26.6258	26.9864	NA	NA	NA	0.436625	NA
UK013	UK013_291	NA	2201	35690	546	1.61874	NA	NA	12.3457	3.24191	0.0621	6.62809	NA	NA	0.69355	7.37845	0.081	3.24191	0.63348	NA	NA	677.554	142.028	143.055	502.089	15.6596	16.7704	534.931	30.6907	31.299	NA	NA	NA	0.738404	25.8969
UK013	UK013_305	NA	679	14580	347.9	1.59954	NA	NA	21.1416	3.6069	0.0444	8.35094	NA	NA	0.289565	9.09658	0.0473	3.6069	0.68012	NA	NA	NA	NA	NA	297.924	10.5013	11.107	258.217	20.743	21.0143	NA	NA	NA	1.83764e-05	NA
UK013	UK013_309	NA	4140	56580	342	1.90848	NA	NA	5.40249	3.18665	0.0692	6.05212	NA	NA	1.76609	6.8398	0.1851	3.18665	0.67641	NA	NA	904.708	124.983	126.064	1094.78	32.0854	34.4384	1033.09	44.3707	45.3932	NA	NA	NA	0.0110641	-21.0088
UK013	UK013_310	NA	1210	26300	1130	1.76562	NA	NA	38.3877	3.04625	0.0436	8.20455	NA	NA	0.156601	8.75182	0.02605	3.04625	0.052529	NA	NA	NA	NA	NA	165.779	4.98566	5.38448	147.724	12.0326	12.2025	NA	NA	NA	0.444953	NA
UK013	UK013_313	NA	172	950	59.8	2.00671	NA	NA	57.8035	6.24708	0.177	13.2805	NA	NA	0.422202	14.6764	0.0173	6.24708	-0.075748	NA	NA	NA	NA	NA	110.569	6.84845	6.98261	357.625	44.2675	44.491	NA	NA	NA	1.78702e-20	NA
UK013	UK013_320	NA	132	1600	104.1	1.4808	NA	NA	60.241	4.92575	0.084	15.028	NA	NA	0.19226	15.8147	0.0166	4.92575	-0.26184	NA	NA	NA	NA	NA	106.132	5.185	5.34743	178.556	25.9001	26.0127	NA	NA	NA	3.92381e-05	NA
UK013	UK013_333	NA	128	1710	113.6	1.62751	NA	NA	61.3497	5.23075	0.077	16.9893	NA	NA	0.173053	17.7763	0.0163	5.23075	-0.30285	NA	NA	NA	NA	NA	104.229	5.40814	5.55864	162.065	26.6337	26.7254	NA	NA	NA	0.00843037	NA
UK013	UK013_334	NA	228	3840	175.2	1.72102	NA	NA	43.6681	3.61921	0.0618	10.8766	NA	NA	0.195131	11.4629	0.0229	3.61921	-0.20842	NA	NA	NA	NA	NA	145.958	5.22317	5.52243	180.998	19.0058	19.1627	NA	NA	NA	0.0854092	NA
UK013	UK013_335	NA	50	742	51.9	1.62594	NA	NA	66.6667	6.40114	0.067	16.4169	NA	NA	0.138569	17.6207	0.015	6.40114	0.44189	NA	NA	NA	NA	NA	95.9782	6.09819	6.21202	131.769	21.7785	21.8548	NA	NA	NA	0.0405603	NA
UK013	UK013_340	NA	930	22600	950	1.63793	NA	NA	39.4789	3.23786	0.0439	8.05264	NA	NA	0.153321	8.67922	0.02533	3.23786	0.23375	NA	NA	NA	NA	NA	161.254	5.15642	5.52309	144.84	11.716	11.8842	NA	NA	NA	0.454085	NA
UK013	UK013_341	NA	119	1668	41	1.24242	NA	NA	22.9358	4.47302	0.072	15.5769	NA	NA	0.432833	16.2064	0.0436	4.47302	0.46588	NA	NA	NA	NA	NA	275.109	12.0468	12.503	365.186	49.7496	49.9558	NA	NA	NA	0.0158357	NA
UK013	UK013_342	NA	14800	124300	381.3	2.41329	NA	NA	2.89603	3.13382	0.1277	5.03976	NA	NA	6.07979	5.93464	0.3453	3.13382	0.46294	NA	NA	2066.55	88.9491	90.055	1912.12	51.8536	55.7812	1987.35	51.7927	53.373	NA	NA	NA	0.545156	7.47304
UK013	UK013_343	NA	695	12320	207.4	2.13814	NA	NA	15.7729	3.50271	0.0617	8.17895	NA	NA	0.539356	8.89743	0.0634	3.50271	0.73128	NA	NA	NA	NA	NA	396.27	13.4622	14.2842	438	31.6644	32.0973	NA	NA	NA	0.0627656	NA
UK013	UK013_345	NA	5560	80600	648.1	3.10096	NA	NA	7.57576	3.34149	0.0743	6.16092	NA	NA	1.35227	7.00874	0.132	3.34149	-0.030739	NA	NA	1049.63	124.437	125.476	799.265	25.1182	26.7987	868.54	40.9338	41.8324	NA	NA	NA	0.515104	23.8525
UK013	UK013_346	NA	330	5800	318	1.6879	NA	NA	53.4759	9.80914	0.057	11.9687	NA	NA	0.146966	15.4748	0.0187	9.80914	0.77107	NA	NA	NA	NA	NA	119.435	11.6077	11.7004	139.23	20.1362	20.2276	NA	NA	NA	0.363106	NA
UK013	UK013_347	NA	5040	67700	452	3.63344	NA	NA	6.17284	3.26582	0.0792	5.97683	NA	NA	1.76906	6.81088	0.162	3.26582	0.51005	NA	NA	1177.14	118.441	119.491	967.882	29.351	31.4037	1034.17	44.2097	45.237	NA	NA	NA	0.081365	17.7767
UK013	UK013_354	NA	148	2960	213	1.18994	NA	NA	67.5676	5.3107	0.0591	12.1607	NA	NA	0.120601	13.2698	0.0148	5.3107	0.56372	NA	NA	NA	NA	NA	94.7078	4.99288	5.12773	115.617	14.5018	14.5912	NA	NA	NA	0.0860807	NA
UK013	UK013_355	NA	2110	38800	1057	1.16538	NA	NA	24.4499	3.28528	0.0587	6.98829	NA	NA	0.331026	7.72199	0.0409	3.28528	0.61065	NA	NA	NA	NA	NA	258.409	8.32156	8.89689	290.349	19.5024	19.8555	NA	NA	NA	0.0077834	NA
UK013	UK013_357	NA	755	13040	202	2.00397	NA	NA	13.8504	3.36212	0.0637	7.9963	NA	NA	0.634129	8.67436	0.0722	3.36212	0.10473	NA	NA	NA	NA	NA	449.396	14.5946	15.5595	498.665	34.1919	34.6836	NA	NA	NA	0.679259	NA
UK013	UK013_360	NA	1230	20200	327	2.98903	NA	NA	14.1643	3.23043	0.0646	8.5545	NA	NA	0.628838	9.14413	0.0706	3.23043	0.11146	NA	NA	NA	NA	NA	439.769	13.7327	14.7136	495.372	35.8603	36.3247	NA	NA	NA	0.323315	NA
UK013	UK013_366	NA	5190	75800	728	10.9639	NA	NA	8.21018	3.14322	0.0734	5.77932	NA	NA	1.23266	6.57879	0.1218	3.14322	0.55828	NA	NA	1025.02	117.136	118.247	740.916	22.0002	23.6569	815.551	36.8967	37.8146	NA	NA	NA	0.000255858	27.7168
UK013	UK013_370	NA	591	10290	245.7	1.18638	NA	NA	20.4082	3.41275	0.0608	9.02374	NA	NA	0.410772	9.64753	0.049	3.41275	0.11567	NA	NA	NA	NA	NA	308.379	10.2765	10.9364	349.431	28.5302	28.8622	NA	NA	NA	0.566644	NA
UK013	UK013_381	NA	1803	27720	599	1.15192	NA	NA	17.0068	3.22545	0.0641	6.93856	NA	NA	0.519681	7.65161	0.0588	3.22545	0.12477	NA	NA	NA	NA	NA	368.324	11.5471	12.3743	424.938	26.5746	27.0646	NA	NA	NA	0.00599879	NA
UK013	UK013_389	NA	430	7000	467	1.1335	NA	NA	51.0204	4.10302	0.0575	10.7963	NA	NA	0.155391	11.5497	0.0196	4.10302	0.029478	NA	NA	NA	NA	NA	125.127	5.0845	5.31255	146.661	15.7736	15.9019	NA	NA	NA	0.93664	NA
UK013	UK013_396	NA	101	2580	170.4	1.58659	NA	NA	50.7614	4.09333	0.0392	14.4191	NA	NA	0.106476	14.9889	0.0197	4.09333	0.046722	NA	NA	NA	NA	NA	125.76	5.09787	5.32758	102.737	14.6467	14.7176	NA	NA	NA	0.235683	NA
UK013	UK013_404	NA	1073	15160	284.8	9.99298	NA	NA	13.7741	3.7188	0.0694	7.58933	NA	NA	0.6947	8.45148	0.0726	3.7188	0.49935	NA	NA	NA	NA	NA	451.801	16.2264	17.1082	535.62	35.1918	35.7247	NA	NA	NA	1.44354e-05	NA
UK013	UK013_405	NA	92	1530	131	1.28937	NA	NA	62.5	5.29679	0.066	13.2438	NA	NA	0.145601	14.2638	0.016	5.29679	0.50385	NA	NA	NA	NA	NA	102.326	5.37722	5.5232	138.021	18.4096	18.5079	NA	NA	NA	0.0019308	NA
UK013	UK013_410	NA	189	2720	230	1.65468	NA	NA	59.8802	4.44917	0.071	16.573	NA	NA	0.163484	17.1598	0.0167	4.44917	-0.16901	NA	NA	NA	NA	NA	106.766	4.71109	4.89137	153.749	24.4873	24.5778	NA	NA	NA	0.0340258	NA
UK013	UK013_415	NA	120	1070	95.3	1.15937	NA	NA	64.5161	7.10273	0.122	12.1334	NA	NA	0.260731	14.0594	0.0155	7.10273	0.33548	NA	NA	NA	NA	NA	99.153	6.98868	7.09482	235.256	29.5318	29.6941	NA	NA	NA	1.13553e-17	NA
UK013	UK013_422	NA	6340	92000	1100	34.7003	NA	NA	8.61326	3.18536	0.0711	6.34377	NA	NA	1.13816	7.09859	0.1161	3.18536	0.39523	NA	NA	960.29	129.906	130.929	708.077	21.3603	22.928	771.636	38.3859	39.2075	NA	NA	NA	0.053551	26.2642
UK013	UK013_425	NA	300	5030	301.2	0.805348	NA	NA	43.4783	3.83242	0.0625	10.2054	NA	NA	0.198203	10.9013	0.023	3.83242	0.37497	NA	NA	NA	NA	NA	146.588	5.55448	5.83914	183.604	18.3119	18.479	NA	NA	NA	0.00198959	NA
UK013	UK013_442	NA	75	716	57.9	1.60833	NA	NA	57.4713	5.72366	0.116	18.0246	NA	NA	0.278297	18.9116	0.0174	5.72366	-0.074228	NA	NA	NA	NA	NA	111.203	6.31029	6.45729	249.306	41.8292	41.9565	NA	NA	NA	1.31063e-07	NA
UK013	UK013_444	NA	261	4420	408	1.17919	NA	NA	65.3168	3.52752	0.061	12.3208	NA	NA	0.128768	12.8158	0.01531	3.52752	0.18498	NA	NA	NA	NA	NA	97.9467	3.42897	3.63549	122.99	14.846	14.9441	NA	NA	NA	0.0703212	NA
UK013	UK013_446	NA	320	5480	429	1.70238	NA	NA	53.4759	4.19617	0.0573	10.6995	NA	NA	0.14774	11.493	0.0187	4.19617	0.26339	NA	NA	NA	NA	NA	119.435	4.96554	5.17868	139.914	15.0227	15.1461	NA	NA	NA	0.522741	NA
UK013	UK013_450	NA	1170	18210	318	4.43515	NA	NA	12.1951	3.51067	0.0649	8.26979	NA	NA	0.73377	8.98411	0.082	3.51067	0.47437	NA	NA	771.096	174.764	175.579	508.05	17.1512	18.1939	558.763	38.6263	39.1445	NA	NA	NA	0.366184	34.1134
UK013	UK013_473	NA	950	14980	274	1.44362	NA	NA	13.2626	3.59636	0.0652	8.89909	NA	NA	0.677829	9.59831	0.0754	3.59636	0.11974	NA	NA	NA	NA	NA	468.607	16.2549	17.1977	525.462	39.3927	39.856	NA	NA	NA	0.635777	NA
UK013	UK013_482	NA	1916	27030	384	6.03774	NA	NA	10.2987	3.16991	0.0734	7.05579	NA	NA	0.98269	7.73515	0.0971	3.16991	0.31984	NA	NA	1025.02	143.136	144.049	597.391	18.0859	19.4258	694.984	38.9469	39.6502	NA	NA	NA	5.27456e-05	41.7189
UK013	UK013_486	NA	6190	94900	1370	8.61635	NA	NA	10.4058	3.40338	0.0687	5.80445	NA	NA	0.910293	6.72864	0.0961	3.40338	0.36351	NA	NA	889.745	120.13	121.259	591.513	19.2355	20.4774	657.214	32.5677	33.3424	NA	NA	NA	0.00397711	33.5189
UK013	UK013_502	NA	3030	44100	522	14.4199	NA	NA	9.01713	3.3072	0.0748	6.80242	NA	NA	1.14376	7.56376	0.1109	3.3072	0.3742	NA	NA	1063.13	137.177	138.118	677.973	21.2832	22.7359	774.291	40.998	41.7719	NA	NA	NA	0.000151635	36.2288
UK013	UK013_503	NA	570	9810	251	1.67111	NA	NA	19.7628	3.75986	0.0617	8.72333	NA	NA	0.430464	9.49911	0.0506	3.75986	0.25497	NA	NA	NA	NA	NA	318.204	11.6736	12.2946	363.506	29.0329	29.3814	NA	NA	NA	0.175323	NA
UK013	UK013_505	NA	2540	33610	421	2.04171	NA	NA	9.56023	3.28271	0.0819	6.82207	NA	NA	1.18118	7.57079	0.1046	3.28271	-0.27056	NA	NA	1243.13	133.982	134.896	641.31	20.0391	21.4267	791.864	41.6523	42.4372	NA	NA	NA	1.41306e-06	48.4115
UK013	UK013_508	NA	1217	22470	1309	2.34168	NA	NA	44.7427	3.27523	0.057	7.8416	NA	NA	0.175652	8.4981	0.02235	3.27523	0.73674	NA	NA	NA	NA	NA	142.491	4.61571	4.93672	164.312	12.8929	13.0859	NA	NA	NA	0.00171864	NA
UK013	UK013_510	NA	11080	105100	454	2.02137	NA	NA	3.34113	3.31666	0.1129	5.26783	NA	NA	4.6591	6.22497	0.2993	3.31666	0.44973	NA	NA	1846.61	95.4216	96.5084	1687.84	49.2521	52.5953	1759.93	52.0838	53.5301	NA	NA	NA	0.729683	8.59821
UK013	UK013_513	NA	297	1020	53	1.60606	NA	NA	39.8406	8.68507	0.338	14.9085	NA	NA	1.16975	17.2538	0.0251	8.68507	0.77273	NA	NA	NA	NA	NA	159.808	13.7088	13.8484	786.526	94.7229	95.0708	NA	NA	NA	7.64888e-24	NA
UK013	UK013_516	NA	1410	21500	339	6.16364	NA	NA	12.2399	3.33776	0.0697	8.2375	NA	NA	0.785156	8.88803	0.0817	3.33776	0.074524	NA	NA	919.528	170.016	170.814	506.262	16.2514	17.341	588.421	39.7134	40.2577	NA	NA	NA	0.0136797	44.9433
UK013	UK013_519	NA	70	1030	76.2	1.32292	NA	NA	57.8035	6.75883	0.074	17.3356	NA	NA	0.176514	18.6066	0.0173	6.75883	0.40265	NA	NA	NA	NA	NA	110.569	7.40947	7.53364	165.056	28.3525	28.4416	NA	NA	NA	0.0055338	NA
UK013	UK013_521	NA	440	7600	219.2	1.25472	NA	NA	22.4215	3.33279	0.0596	9.41913	NA	NA	0.366507	9.99137	0.0446	3.33279	0.26712	NA	NA	NA	NA	NA	281.283	9.17299	9.7898	317.061	27.2163	27.5118	NA	NA	NA	0.743869	NA
UK013	UK013_524	NA	158	2600	147.1	2.54059	NA	NA	42.735	5.38945	0.063	14.2741	NA	NA	0.203263	15.2577	0.0234	5.38945	0.29772	NA	NA	NA	NA	NA	149.108	7.94389	8.1523	187.883	26.1765	26.2987	NA	NA	NA	0.232357	NA
UK013	UK013_538	NA	27050	172900	580.3	3.10819	NA	NA	2.62743	3.15987	0.1553	4.77687	NA	NA	8.1497	5.72742	0.3806	3.15987	0.027408	NA	NA	2405.12	81.2666	82.3902	2079.09	56.1565	60.3426	2247.77	51.8443	53.5408	NA	NA	NA	0.00103824	13.5558
UK013	UK013_547	NA	32	1190	135	1.4485	NA	NA	90.0901	6.97154	0.03	24.2966	NA	NA	0.045914	25.277	0.0111	6.97154	-0.27315	NA	NA	NA	NA	NA	71.161	4.93374	5.01149	45.5817	11.2674	11.2865	NA	NA	NA	0.0130963	NA
UK013	UK013_558	NA	330	3800	203.3	1.09596	NA	NA	43.4972	3.59071	0.09	12.0543	NA	NA	0.285288	12.5777	0.02299	3.59071	0.18626	NA	NA	NA	NA	NA	146.525	5.20195	5.50462	254.843	28.3549	28.5495	NA	NA	NA	1.63093e-11	NA
UK013	UK013_567	NA	976	17430	1516	0.648973	NA	NA	73.8552	3.30956	0.0584	8.79222	NA	NA	0.109027	9.39449	0.01354	3.30956	0.23823	NA	NA	NA	NA	NA	86.6988	2.85014	3.0444	105.075	9.37791	9.49293	NA	NA	NA	0.00657192	NA
UK013	UK013_568	NA	100	1510	151.4	2.2597	NA	NA	84.7458	6.2621	0.072	17.4039	NA	NA	0.117143	18.4962	0.0118	6.2621	-0.020451	NA	NA	NA	NA	NA	75.6224	4.70788	4.79967	112.478	19.6958	19.7584	NA	NA	NA	0.0362708	NA
UK013	UK013_570	NA	403	6040	154.4	1.13948	NA	NA	20.9644	4.81403	0.064	12.2781	NA	NA	0.42092	13.1881	0.0477	4.81403	0.65033	NA	NA	NA	NA	NA	300.385	14.1289	14.592	356.709	39.6884	39.9364	NA	NA	NA	0.078049	NA
UK013	UK013_574	NA	88	2560	176.9	2.08118	NA	NA	58.2751	3.99929	0.0348	15.9185	NA	NA	0.0823375	16.4132	0.01716	3.99929	0.23643	NA	NA	NA	NA	NA	109.682	4.3494	4.5545	80.3402	12.6789	12.73	NA	NA	NA	0.000159552	NA
UK013	UK013_586	NA	578	12150	292.6	1.98777	NA	NA	20.202	3.61342	0.0468	8.91755	NA	NA	0.319413	9.62183	0.0495	3.61342	0.2959	NA	NA	NA	NA	NA	311.451	10.9865	11.618	281.451	23.6558	23.9325	NA	NA	NA	0.810213	NA
UK013	UK013_597	NA	109	1580	123.8	1.03772	NA	NA	66.6667	4.73103	0.072	18.5238	NA	NA	0.14891	19.1184	0.015	4.73103	-0.096119	NA	NA	NA	NA	NA	95.9782	4.50712	4.65998	140.949	25.1657	25.2406	NA	NA	NA	0.0692572	NA
UK013	UK013_601	NA	101	1460	116.4	1.4828	NA	NA	64.9351	5.43787	0.071	14.2118	NA	NA	0.150758	15.2166	0.0154	5.43787	0.38767	NA	NA	NA	NA	NA	98.5181	5.31656	5.4536	142.581	20.2443	20.3393	NA	NA	NA	0.000482444	NA
UK013	UK013_630	NA	70	830	66.7	1.86835	NA	NA	62.1118	9.18171	0.074	15.212	NA	NA	0.16427	17.7682	0.0161	9.18171	0.29992	NA	NA	NA	NA	NA	102.961	9.37846	9.46395	154.434	25.4607	25.5484	NA	NA	NA	0.00366007	NA
UK013	UK013_637	NA	146	2330	243.4	1.96926	NA	NA	80	5.65153	0.066	14.529	NA	NA	0.113751	15.5895	0.0125	5.65153	0.050458	NA	NA	NA	NA	NA	80.0807	4.49779	4.60522	109.391	16.1683	16.2406	NA	NA	NA	0.047433	NA
University of Calgary, Centre for Pure and Applied Tectonics and Thermochronology
15-PIC-02 HT		f206c	207Pb CPS	206Pb CPS	U (ppm)1	U/Th	206Pb/204Pb	1σ %	Data for Tera-Wasserburg plot2				208Pb/206Pb	2σx (%)	Data for Wetherill plot2					208Pb/232Th	2σx (%)	Dates									208Pb/232Th	2σx (ABS)	2σtotal (ABS)	Prob. Conc. (%)	% conc3	Comments	Accepted Dates4
Sample	Spot								238U/206Pb	2σx (%)	207Pb/206Pb	2σx (%)			207Pb/235Pb	2σx (%)	206Pb/238U	2σx (%)	Rho			207Pb/206Pb	2σx (ABS)	2σtotal (ABS)	206Pb/238U	2σx (ABS)	2σtotal (ABS)	207Pb/235Pb	2σx (ABS)	2σtotal (ABS)							Date (Ma)	2σx (ABS)	2σx (%)	2σtotal (ABS)	2σtotal (%)
UK011	UK011_513	NA	650	13270	963	2.98142	NA	NA	86.6551	2.98889	0.0518	9.87057	NA	NA	0.0824208	10.3132	0.01154	2.98889	-0.2547	NA	NA	NA	NA	NA	73.9657	2.19812	2.3805	80.4184	7.97392	8.05515	NA	NA	NA	14.323	NA		73.9657	2.19812	2.97181	2.3805	3.18515
UK011	UK011_219	NA	1508	32110	2545	4.10484	NA	NA	86.2069	2.9346	0.0493	7.52186	NA	NA	0.0788508	8.07405	0.0116	2.9346	-0.0069026	NA	NA	NA	NA	NA	74.348	2.16929	2.35574	77.0639	5.99199	6.09127	NA	NA	NA	39.5534	NA		74.348	2.16929	2.91775	2.35574	3.15502
UK011	UK011_293	NA	192	3900	297.1	1.06487	NA	NA	85.8369	4.4721	0.0487	12.6462	NA	NA	0.0782269	13.4137	0.01165	4.4721	0.22596	NA	NA	NA	NA	NA	74.6666	3.31991	3.44567	76.4766	9.88183	9.94146	NA	NA	NA	70.8874	NA		74.6666	3.31991	4.44631	3.44567	4.61047
UK011	UK011_88	NA	705	13600	961	1.68301	NA	NA	84.3882	3.10791	0.0508	10.5037	NA	NA	0.083001	10.9539	0.01185	3.10791	-0.1855	NA	NA	NA	NA	NA	75.9409	2.34633	2.52691	80.9625	8.52436	8.60138	NA	NA	NA	27.8608	NA		75.9409	2.34633	3.08967	2.52691	3.30404
UK011	UK011_615	NA	191	3460	254	2.93303	NA	NA	84.3882	4.79887	0.053	15.8307	NA	NA	0.0865955	16.5421	0.01185	4.79887	0.00045215	NA	NA	NA	NA	NA	75.9409	3.62293	3.74241	84.327	13.3867	13.4399	NA	NA	NA	22.8102	NA		75.9409	3.62293	4.77072	3.74241	4.89163
UK011	UK011_71	NA	258	4760	346.2	2.94138	NA	NA	84.1751	3.35533	0.0527	11.9862	NA	NA	0.0863234	12.447	0.01188	3.35533	-0.16417	NA	NA	NA	NA	NA	76.1321	2.53946	2.708	84.0726	10.0433	10.1137	NA	NA	NA	14.1077	NA		76.1321	2.53946	3.3356	2.708	3.52343
UK011	UK011_579	NA	1133	21590	1674	12.1392	NA	NA	84.0336	3.0268	0.053	8.49614	NA	NA	0.0869609	9.0192	0.0119	3.0268	-0.35475	NA	NA	NA	NA	NA	76.2595	2.29462	2.48046	84.6684	7.32682	7.42426	NA	NA	NA	4.63865	NA		76.2595	2.29462	3.00897	2.48046	3.19709
UK011	UK011_176	NA	767	14590	1088	3.01552	NA	NA	83.8926	3.14508	0.0514	8.56429	NA	NA	0.0844774	9.12352	0.01192	3.14508	0.09459	NA	NA	NA	NA	NA	76.3869	2.38825	2.56789	82.3458	7.21639	7.31019	NA	NA	NA	10.7391	NA		76.3869	2.38825	3.12652	2.56789	3.3424
UK011	UK011_518	NA	835	16850	1202	3.16316	NA	NA	83.4725	3.12028	0.0524	8.76071	NA	NA	0.0865544	9.2998	0.01198	3.12028	-0.038892	NA	NA	NA	NA	NA	76.7691	2.3812	2.56307	84.2886	7.52227	7.61641	NA	NA	NA	6.01819	NA		76.7691	2.3812	3.10177	2.56307	3.30654
UK011	UK011_40	NA	106	2070	142.5	1.20355	NA	NA	83.4028	4.72668	0.0524	13.3632	NA	NA	0.0866267	14.1745	0.01199	4.72668	0.48111	NA	NA	NA	NA	NA	76.8328	3.61008	3.73275	84.3561	11.4743	11.5363	NA	NA	NA	14.3342	NA		76.8328	3.61008	4.69862	3.73275	4.89008
UK011	UK011_84	NA	347	5880	421	0.985948	NA	NA	83.4028	3.60395	0.0542	11.5273	NA	NA	0.0896024	12.0776	0.01199	3.60395	0.053891	NA	NA	NA	NA	NA	76.8328	2.75258	2.91159	87.1329	10.085	10.16	NA	NA	NA	4.66787	NA		76.8328	2.75258	3.58255	2.91159	3.76113
UK011	UK011_580	NA	1357	26410	2003	8.5234	NA	NA	83.2639	3.13907	0.052	7.56768	NA	NA	0.0861088	8.19289	0.01201	3.13907	0.079561	NA	NA	NA	NA	NA	76.9602	2.40147	2.58277	83.8721	6.5955	6.70165	NA	NA	NA	4.37724	NA		76.9602	2.40147	3.1204	2.58277	3.32746
UK011	UK011_469	NA	401	8400	710	3.32553	NA	NA	83.0565	3.36431	0.0458	11.483	NA	NA	0.0760314	11.9657	0.01204	3.36431	0.23885	NA	NA	NA	NA	NA	77.1513	2.58014	2.75049	74.4069	8.5851	8.65016	NA	NA	NA	51.0583	NA		77.1513	2.58014	3.34425	2.75049	3.56759
UK011	UK011_523	NA	824	16850	1140	4.52381	NA	NA	83.0565	3.11649	0.0517	9.21079	NA	NA	0.0858259	9.72375	0.01204	3.11649	-0.16545	NA	NA	NA	NA	NA	77.1513	2.39008	2.57305	83.6075	7.80423	7.89361	NA	NA	NA	13.1099	NA		77.1513	2.39008	3.09791	2.57305	3.30186
UK011	UK011_348	NA	743	16530	1371	8.93742	NA	NA	82.1693	2.96224	0.0456	8.71736	NA	NA	0.0765168	9.20691	0.01217	2.96224	-0.19294	NA	NA	NA	NA	NA	77.9793	2.29602	2.48984	74.8648	6.64486	6.72969	NA	NA	NA	40.1767	NA		77.9793	2.29602	2.9444	2.48984	3.21205
UK011	UK011_313	NA	516	10130	772	1.51373	NA	NA	81.9672	3.21124	0.0516	9.09001	NA	NA	0.0867982	9.64056	0.0122	3.21124	0.21273	NA	NA	NA	NA	NA	78.1704	2.49508	2.67536	84.5164	7.81812	7.9092	NA	NA	NA	9.95776	NA		78.1704	2.49508	3.19185	2.67536	3.41293
UK011	UK011_551	NA	574	11430	812	1.46306	NA	NA	81.4996	3.29555	0.0531	8.78211	NA	NA	0.0898339	9.38009	0.01227	3.29555	-0.18859	NA	NA	NA	NA	NA	78.6162	2.5751	2.75206	87.3487	7.85101	7.9476	NA	NA	NA	4.56726	NA		78.6162	2.5751	3.27554	2.75206	3.44829
UK011	UK011_529	NA	483	10520	716.1	1.3385	NA	NA	81.4332	3.4894	0.0452	9.27753	NA	NA	0.0765311	9.91204	0.01228	3.4894	0.16444	NA	NA	NA	NA	NA	78.6799	2.72877	2.89662	74.8784	7.15503	7.23391	NA	NA	NA	29.1972	NA		78.6799	2.72877	3.46819	2.89662	3.69612
UK011	UK011_119	NA	223	4360	289.6	1.72381	NA	NA	80.7103	3.63322	0.053	12.2671	NA	NA	0.0905417	12.7938	0.01239	3.63322	0.0062805	NA	NA	NA	NA	NA	79.3803	2.86637	3.02938	88.0078	10.7858	10.8573	NA	NA	NA	12.2867	NA		79.3803	2.86637	3.61094	3.02938	3.78997
UK011	UK011_139	NA	504	11210	723.2	1.62152	NA	NA	80	3.23206	0.0449	8.85443	NA	NA	0.0773852	9.42588	0.0125	3.23206	0.11793	NA	NA	NA	NA	NA	80.0807	2.57224	2.75579	75.6836	6.87456	6.95832	NA	NA	NA	21.1435	NA		80.0807	2.57224	3.21206	2.75579	3.45871
UK011	UK011_288	NA	281	5710	411	1.55623	NA	NA	79.8722	3.64305	0.0454	10.4935	NA	NA	0.0783721	11.1079	0.01252	3.64305	0.15902	NA	NA	NA	NA	NA	80.208	2.90392	3.06819	76.6133	8.1972	8.26923	NA	NA	NA	38.2742	NA		80.208	2.90392	3.62048	3.06819	3.83712
UK011	UK011_510	NA	307	7420	504	1.17757	NA	NA	79.7448	3.10604	0.0438	11.4665	NA	NA	0.0757309	11.8798	0.01254	3.10604	0.0086556	NA	NA	NA	NA	NA	80.3354	2.47977	2.67084	74.1233	8.49215	8.55743	NA	NA	NA	15.8139	NA		80.3354	2.47977	3.08677	2.67084	3.34458
UK011	UK011_419	NA	848	17950	1390	1.33654	NA	NA	78.4314	3.27789	0.047	8.5358	NA	NA	0.0826246	9.14354	0.01275	3.27789	0.22518	NA	NA	NA	NA	NA	81.6722	2.66024	2.84496	80.6095	7.0857	7.17741	NA	NA	NA	76.081	NA		81.6722	2.66024	3.25721	2.84496	3.48603
UK011	UK011_49	NA	208	3980	268	2.62745	NA	NA	78.125	5.07447	0.0527	12.6995	NA	NA	0.0930083	13.6758	0.0128	5.07447	0.10502	NA	NA	NA	NA	NA	81.9905	4.13424	4.25638	90.3019	11.8168	11.8855	NA	NA	NA	17.1048	NA		81.9905	4.13424	5.04234	4.25638	5.14926
UK011	UK011_1	NA	591	12440	721	2.14583	NA	NA	78.064	3.01912	0.05	9.77063	NA	NA	0.0883121	10.2264	0.01281	3.01912	-0.21153	NA	NA	NA	NA	NA	82.0541	2.46161	2.66195	85.9298	8.4262	8.51349	NA	NA	NA	40.3466	NA		82.0541	2.46161	2.99999	2.66195	3.22565
UK011	UK011_53	NA	1007	21420	1364	1.02249	NA	NA	77.2798	3.28439	0.0467	8.03272	NA	NA	0.0833206	8.67823	0.01294	3.28439	0.21403	NA	NA	NA	NA	NA	82.8815	2.70472	2.89182	81.2621	6.7774	6.87471	NA	NA	NA	63.0508	NA		82.8815	2.70472	3.26336	2.89182	3.49422
UK011	UK011_550	NA	101	1860	122.2	2.13636	NA	NA	75.8725	3.53854	0.05	19.4597	NA	NA	0.0908629	19.7788	0.01318	3.53854	0.1327	NA	NA	NA	NA	NA	84.4087	2.96736	3.145	88.3069	16.7296	16.7761	NA	NA	NA	63.9169	NA		84.4087	2.96736	3.51547	3.145	3.72456
UK011	UK011_461	NA	68	1170	92.2	1.83665	NA	NA	75.7576	5.61357	0.046	16.438	NA	NA	0.0837207	17.3701	0.0132	5.61357	0.17546	NA	NA	NA	NA	NA	84.5359	4.7145	4.82862	81.637	13.6262	13.6753	NA	NA	NA	66.9805	NA		84.5359	4.7145	5.57692	4.82862	5.72359
UK011	UK011_323	NA	210	3880	281	3.08791	NA	NA	75.4717	3.53084	0.056	13.0789	NA	NA	0.102307	13.5472	0.01325	3.53084	-0.09775	NA	NA	NA	NA	NA	84.8541	2.97643	3.15537	98.9036	12.7674	12.843	NA	NA	NA	3.69709	NA		84.8541	2.97643	3.50771	3.15537	3.67649
UK011	UK011_319	NA	151	3420	241.9	1.99587	NA	NA	74.5156	4.51329	0.0428	12.4975	NA	NA	0.079195	13.2875	0.01342	4.51329	0.062577	NA	NA	NA	NA	NA	85.9355	3.85278	3.99613	77.3878	9.9011	9.96199	NA	NA	NA	9.90054	NA		85.9355	3.85278	4.48334	3.99613	4.70471
UK011	UK011_277	NA	737	16110	1036	1.32312	NA	NA	74.0741	3.1824	0.0467	8.72178	NA	NA	0.0869264	9.28424	0.0135	3.1824	-0.25515	NA	NA	NA	NA	NA	86.4444	2.73264	2.93356	84.6362	7.53938	7.63404	NA	NA	NA	67.5695	NA		86.4444	2.73264	3.16115	2.93356	3.40571
UK011	UK011_200	NA	272	5490	387	1.548	NA	NA	73.3676	3.33556	0.0495	12.2705	NA	NA	0.0930256	12.7158	0.01363	3.33556	-0.67422	NA	NA	NA	NA	NA	87.2712	2.89136	3.08547	90.3179	10.9891	11.0629	NA	NA	NA	64.2499	NA		87.2712	2.89136	3.31308	3.08547	3.51428
UK011	UK011_284	NA	318	6000	380.5	1.81363	NA	NA	72.5163	3.78665	0.0541	10.849	NA	NA	0.102864	11.4909	0.01379	3.78665	-0.049059	NA	NA	NA	NA	NA	88.2887	3.3204	3.4946	99.4165	10.8828	10.9722	NA	NA	NA	5.47043	NA		88.2887	3.3204	3.76084	3.4946	3.91129
UK011	UK011_425	NA	1180	23010	1655	1.63699	NA	NA	71.6332	2.94438	0.0476	8.48414	NA	NA	0.0916207	8.98053	0.01396	2.94438	-0.13977	NA	NA	NA	NA	NA	89.3696	2.61322	2.8364	89.012	7.65354	7.7562	NA	NA	NA	93.2352	NA		89.3696	2.61322	2.92406	2.8364	3.17551
UK011	UK011_55	NA	58	935	55.4	1.55182	NA	NA	71.4286	5.06506	0.055	20.0549	NA	NA	0.106168	20.6846	0.014	5.06506	-0.031795	NA	NA	NA	NA	NA	89.6239	4.5081	4.64177	102.454	20.1607	20.212	NA	NA	NA	21.9844	NA		89.6239	4.5081	5.03002	4.64177	5.14028
UK011	UK011_291	NA	164	3420	212	2.52381	NA	NA	71.3267	4.06368	0.0496	13.0167	NA	NA	0.0958806	13.6363	0.01402	4.06368	0.045463	NA	NA	NA	NA	NA	89.751	3.62193	3.78747	92.9667	12.1147	12.1855	NA	NA	NA	60.696	NA		89.751	3.62193	4.03552	3.78747	4.20926
UK011	UK011_328	NA	449	8710	619	2.49597	NA	NA	71.3267	3.16883	0.052	10.2611	NA	NA	0.10052	10.7392	0.01402	3.16883	-0.21229	NA	NA	NA	NA	NA	89.751	2.82435	3.03373	97.2563	9.96028	10.0539	NA	NA	NA	17.0263	NA		89.751	2.82435	3.14688	3.03373	3.34758
UK011	UK011_238	NA	46	1240	84	1.38843	NA	NA	70.922	7.58018	0.048	22.4001	NA	NA	0.0933172	23.6479	0.0141	7.58018	-0.14365	NA	NA	NA	NA	NA	90.2596	6.79416	6.88484	90.5888	20.4973	20.5372	NA	NA	NA	97.6658	NA		90.2596	6.79416	7.52736	6.88484	7.62419
UK011	UK011_132	NA	640	13600	778	1.39427	NA	NA	70.6714	2.99545	0.0481	8.36338	NA	NA	0.0938432	8.88362	0.01415	2.99545	0.14789	NA	NA	NA	NA	NA	90.5774	2.69423	2.91684	91.0772	7.73885	7.84491	NA	NA	NA	89.8174	NA		90.5774	2.69423	2.9745	2.91684	3.21906
UK011	UK011_365	NA	112	1960	141.7	1.51227	NA	NA	70.6714	4.31099	0.059	13.8352	NA	NA	0.115109	14.4913	0.01415	4.31099	-0.046176	NA	NA	NA	NA	NA	90.5774	3.87748	4.03533	110.628	15.1902	15.2688	NA	NA	NA	1.21139	NA		90.5774	3.87748	4.28084	4.03533	4.38803
UK011	UK011_190	NA	147	2730	172.7	1.4537	NA	NA	70.1262	3.65528	0.054	16.5668	NA	NA	0.106173	16.9653	0.01426	3.65528	0.75557	NA	NA	NA	NA	NA	91.2766	3.3129	3.49909	102.459	16.5356	16.5981	NA	NA	NA	11.7868	NA		91.2766	3.3129	3.62952	3.49909	3.90536
UK011	UK011_371	NA	188	4150	296.7	1.33169	NA	NA	70.0771	3.49489	0.05	13.2962	NA	NA	0.0983774	13.7479	0.01427	3.49489	0.37759	NA	NA	NA	NA	NA	91.3402	3.16973	3.36411	95.2774	12.5035	12.5753	NA	NA	NA	50.1109	NA		91.3402	3.16973	3.47024	3.36411	3.68882
UK011	UK011_78	NA	130	2728	159.1	1.08675	NA	NA	70.028	3.58363	0.048	17.2292	NA	NA	0.0945085	17.598	0.01428	3.58363	0.39219	NA	NA	NA	NA	NA	91.4037	3.25246	3.44243	91.6945	15.4304	15.4846	NA	NA	NA	96.7932	NA		91.4037	3.25246	3.55834	3.44243	3.7667
UK011	UK011_307	NA	108	2570	166.7	1.29025	NA	NA	69.9301	4.7005	0.044	17.5105	NA	NA	0.0867541	18.1304	0.0143	4.7005	0.3896	NA	NA	NA	NA	NA	91.5308	4.27201	4.41875	84.4752	14.6969	14.7455	NA	NA	NA	29.8108	NA		91.5308	4.27201	4.66729	4.41875	4.81539
UK011	UK011_226	NA	187	4240	282	1.02174	NA	NA	69.4444	3.54848	0.0447	12.4528	NA	NA	0.0887506	12.9485	0.0144	3.54848	-0.065623	NA	NA	NA	NA	NA	92.1663	3.24724	3.44057	86.3388	10.7179	10.7873	NA	NA	NA	30.5512	NA		92.1663	3.24724	3.52323	3.44057	3.75659
UK011	UK011_255	NA	116	2370	150.5	1.40261	NA	NA	69.4444	5.25877	0.054	15.9677	NA	NA	0.107215	16.8113	0.0144	5.25877	0.38031	NA	NA	NA	NA	NA	92.1663	4.81233	4.94485	103.415	16.5309	16.5945	NA	NA	NA	14.5322	NA		92.1663	4.81233	5.22136	4.94485	5.3855
UK011	UK011_594	NA	311	5750	347	1.31439	NA	NA	68.306	3.65835	0.0538	10.1435	NA	NA	0.108599	10.783	0.01464	3.65835	-0.33731	NA	NA	NA	NA	NA	93.6913	3.40277	3.5937	104.683	10.726	10.826	NA	NA	NA	7.49602	NA		93.6913	3.40277	3.6319	3.5937	3.76637
UK011	UK011_162	NA	277	5220	314	1.27642	NA	NA	68.2594	3.0832	0.055	11.5534	NA	NA	0.111097	11.9577	0.01465	3.0832	0.21413	NA	NA	NA	NA	NA	93.7549	2.86974	3.09402	106.968	12.1408	12.233	NA	NA	NA	2.6856	NA		93.7549	2.86974	3.06089	3.09402	3.29792
UK011	UK011_335	NA	265	6000	421	1.11376	NA	NA	68.0735	3.93734	0.0453	10.6202	NA	NA	0.0917532	11.3266	0.01469	3.93734	0.61818	NA	NA	NA	NA	NA	94.009	3.6746	3.85324	89.1353	9.66583	9.74754	NA	NA	NA	21.8051	NA		94.009	3.6746	3.90877	3.85324	4.07063
UK011	UK011_421	NA	39	710	47.58	1.90244	NA	NA	68.0272	8.90952	0.056	28.0056	NA	NA	0.113503	29.3887	0.0147	8.90952	0.088722	NA	NA	NA	NA	NA	94.0725	8.32056	8.40109	109.165	30.4267	30.4651	NA	NA	NA	33.0566	NA		94.0725	8.32056	8.84483	8.40109	8.86228
UK011	UK011_199	NA	47	950	59.4	1.87975	NA	NA	67.5676	7.26857	0.046	21.2385	NA	NA	0.0938687	22.4479	0.0148	7.26857	0.56492	NA	NA	NA	NA	NA	94.7078	6.83359	6.93272	91.1009	19.5621	19.6043	NA	NA	NA	66.4729	NA		94.7078	6.83359	7.21544	6.93272	7.29147
UK011	UK011_272	NA	120	2570	153.1	1.45671	NA	NA	67.3854	4.0644	0.046	16.0087	NA	NA	0.0941224	16.5165	0.01484	4.0644	0.31766	NA	NA	NA	NA	NA	94.9619	3.83134	4.00639	91.3363	14.428	14.4855	NA	NA	NA	59.5945	NA		94.9619	3.83134	4.03461	4.00639	4.21652
UK011	UK011_62	NA	333	6940	390.6	1.96084	NA	NA	67.2495	3.91238	0.0507	10.737	NA	NA	0.103949	11.4276	0.01487	3.91238	0.49025	NA	NA	NA	NA	NA	95.1525	3.69539	3.87729	100.415	10.9263	11.0171	NA	NA	NA	27.765	NA		95.1525	3.69539	3.88365	3.87729	4.08981
UK011	UK011_147	NA	107	2440	135.7	1.29856	NA	NA	67.1141	4.57515	0.04	19.862	NA	NA	0.0821765	20.3821	0.0149	4.57515	-0.23617	NA	NA	NA	NA	NA	95.343	4.32999	4.48684	80.1891	15.7168	15.7579	NA	NA	NA	7.73484	NA		95.343	4.32999	4.54148	4.48684	4.79615
UK011	UK011_423	NA	694	14560	958	1.44713	NA	NA	67.0241	3.3548	0.0471	8.32879	NA	NA	0.0968927	8.97906	0.01492	3.3548	0.32305	NA	NA	NA	NA	NA	95.4701	3.17923	3.3903	93.904	8.05372	8.16178	NA	NA	NA	68.1758	NA		95.4701	3.17923	3.33008	3.3903	3.55302
UK011	UK011_422	NA	190	3450	229	1.30857	NA	NA	66.7557	3.99423	0.053	12.8693	NA	NA	0.109468	13.4749	0.01498	3.99423	0.69503	NA	NA	NA	NA	NA	95.8511	3.8002	3.97984	105.479	13.5007	13.5814	NA	NA	NA	8.75157	NA		95.8511	3.8002	3.96469	3.97984	4.22384
UK011	UK011_13	NA	318	6620	326.6	0.89676	NA	NA	66.6667	3.36823	0.0508	10.2152	NA	NA	0.105065	10.7561	0.015	3.36823	0.1065	NA	NA	NA	NA	NA	95.9782	3.20882	3.42021	101.441	10.3841	10.4814	NA	NA	NA	30.0959	NA		95.9782	3.20882	3.34328	3.42021	3.55137
UK011	UK011_50	NA	99	1590	88.1	1.79796	NA	NA	66.6667	5.10526	0.062	20.1204	NA	NA	0.128228	20.758	0.015	5.10526	0.40574	NA	NA	NA	NA	NA	95.9782	4.86364	5.00562	122.505	23.9598	24.0203	NA	NA	NA	1.96989	NA		95.9782	4.86364	5.06744	5.00562	5.28472
UK011	UK011_10	NA	405	8600	427	1.58736	NA	NA	66.5336	3.18066	0.0489	9.7278	NA	NA	0.101337	10.2346	0.01503	3.18066	-0.47053	NA	NA	NA	NA	NA	96.1687	3.0361	3.25956	98.01	9.56229	9.6612	NA	NA	NA	74.4927	NA		96.1687	3.0361	3.15706	3.25956	3.37787
UK011	UK011_216	NA	350	7570	470	2.9728	NA	NA	66.2252	3.22933	0.0463	10.1651	NA	NA	0.096396	10.6658	0.0151	3.22933	0.074075	NA	NA	NA	NA	NA	96.6132	3.0967	3.31803	93.4442	9.52196	9.61269	NA	NA	NA	51.6895	NA		96.6132	3.0967	3.20525	3.31803	3.44311
UK011	UK011_270	NA	190	4080	239.2	1.1978	NA	NA	65.8328	3.68703	0.0437	11.0618	NA	NA	0.0915252	11.6601	0.01519	3.68703	0.48873	NA	NA	NA	NA	NA	97.1848	3.55636	3.75289	88.9231	9.92782	10.007	NA	NA	NA	5.80387	NA		97.1848	3.55636	3.65938	3.75289	3.84234
UK011	UK011_128	NA	78	1605	87.5	1.24113	NA	NA	65.7895	4.25891	0.049	16.5065	NA	NA	0.102693	17.0471	0.0152	4.25891	0.49637	NA	NA	NA	NA	NA	97.2483	4.11064	4.28202	99.2592	16.1214	16.1817	NA	NA	NA	78.2106	NA		97.2483	4.11064	4.22695	4.28202	4.4101
UK011	UK011_250	NA	96	1990	115.7	2.00868	NA	NA	65.7895	5.05714	0.05	17.7807	NA	NA	0.104789	18.4859	0.0152	5.05714	0.036732	NA	NA	NA	NA	NA	97.2483	4.88108	5.02626	101.187	17.8053	17.862	NA	NA	NA	66.7153	NA		97.2483	4.88108	5.01919	5.02626	5.15567
UK011	UK011_430	NA	132	2760	177.4	2.18204	NA	NA	65.7895	4.25891	0.0455	12.9438	NA	NA	0.0953578	13.6264	0.0152	4.25891	0.27406	NA	NA	NA	NA	NA	97.2483	4.11064	4.28202	92.4822	12.0457	12.1162	NA	NA	NA	41.0675	NA		97.2483	4.11064	4.22695	4.28202	4.40865
UK011	UK011_353	NA	441	9170	613	2.12111	NA	NA	65.703	3.25769	0.0508	9.70546	NA	NA	0.106606	10.2376	0.01522	3.25769	-0.1362	NA	NA	NA	NA	NA	97.3753	3.14835	3.3696	102.855	10.0145	10.118	NA	NA	NA	31.5591	NA		97.3753	3.14835	3.23321	3.3696	3.4374
UK011	UK011_240	NA	128	2990	181.1	1.42262	NA	NA	65.5308	3.65728	0.043	12.4572	NA	NA	0.0904741	12.9829	0.01526	3.65728	0.29648	NA	NA	NA	NA	NA	97.6292	3.54367	3.74261	87.9449	10.9378	11.0082	NA	NA	NA	6.25809	NA		97.6292	3.54367	3.62972	3.74261	3.83765
UK011	UK011_534	NA	323	6500	372	3.94904	NA	NA	65.4879	3.52777	0.0506	10.0993	NA	NA	0.106535	10.6977	0.01527	3.52777	0.26156	NA	NA	NA	NA	NA	97.6927	3.42039	3.62636	102.79	10.4583	10.5574	NA	NA	NA	31.4739	NA		97.6927	3.42039	3.50117	3.62636	3.7077
UK011	UK011_448	NA	166	2540	161.4	1.33942	NA	NA	65.3595	5.88146	0.052	13.1086	NA	NA	0.109697	14.3675	0.0153	5.88146	0.27499	NA	NA	NA	NA	NA	97.8832	5.71347	5.83959	105.688	14.4222	14.4981	NA	NA	NA	26.5636	NA		97.8832	5.71347	5.83703	5.83959	5.9423
UK011	UK011_451	NA	108	2380	157.3	0.823129	NA	NA	65.3595	4.21737	0.046	17.8857	NA	NA	0.0970399	18.3762	0.0153	4.21737	0.071153	NA	NA	NA	NA	NA	97.8832	4.09692	4.27104	94.0403	16.5064	16.5595	NA	NA	NA	64.5183	NA		97.8832	4.09692	4.18552	4.27104	4.37081
UK011	UK011_554	NA	223	3770	217	1.65649	NA	NA	64.9773	3.21155	0.0563	12.2172	NA	NA	0.119467	12.6322	0.01539	3.21155	0.27347	NA	NA	NA	NA	NA	98.4546	3.1379	3.36458	114.589	13.689	13.7822	NA	NA	NA	1.51645	NA		98.4546	3.1379	3.18715	3.36458	3.42398
UK011	UK011_432	NA	198	3940	250.6	1.59415	NA	NA	64.7668	4.195	0.0465	13.5011	NA	NA	0.0989923	14.1378	0.01544	4.195	-0.24165	NA	NA	NA	NA	NA	98.7721	4.11191	4.2885	95.8458	12.9313	13.0015	NA	NA	NA	68.5857	NA		98.7721	4.11191	4.16303	4.2885	4.36018
UK011	UK011_39	NA	387	8080	441	0.995485	NA	NA	64.6831	3.4495	0.0471	10.6898	NA	NA	0.1004	11.2326	0.01546	3.4495	0.19287	NA	NA	NA	NA	NA	98.899	3.38548	3.59843	97.1451	10.4066	10.496	NA	NA	NA	73.3307	NA		98.899	3.38548	3.42317	3.59843	3.64134
UK011	UK011_560	NA	162	2940	169.8	1.22246	NA	NA	64.6831	3.92793	0.056	13.2791	NA	NA	0.119371	13.8479	0.01546	3.92793	0.42159	NA	NA	NA	NA	NA	98.899	3.85503	4.04333	114.502	14.9958	15.0807	NA	NA	NA	2.51471	NA		98.899	3.85503	3.89795	4.04333	4.12122
UK011	UK011_318	NA	84	1400	86.3	1.24352	NA	NA	64.5161	5.8218	0.059	18.0857	NA	NA	0.126091	18.9996	0.0155	5.8218	-0.14956	NA	NA	NA	NA	NA	99.153	5.72832	5.85734	120.579	21.6048	21.6699	NA	NA	NA	6.6611	NA		99.153	5.72832	5.77726	5.85734	5.78998
UK011	UK011_507	NA	135	2500	137.8	1.62118	NA	NA	64.5161	4.21013	0.056	12.7901	NA	NA	0.11968	13.4652	0.0155	4.21013	0.45675	NA	NA	NA	NA	NA	99.153	4.14253	4.31918	114.782	14.6151	14.7026	NA	NA	NA	1.93007	NA		99.153	4.14253	4.17792	4.31918	4.39822
UK011	UK011_447	NA	299	6470	418	1.97636	NA	NA	64.1437	3.19981	0.0439	12.1227	NA	NA	0.0943652	12.5379	0.01559	3.19981	-0.13676	NA	NA	NA	NA	NA	99.7243	3.16643	3.3968	91.5616	10.978	11.0538	NA	NA	NA	16.6369	NA		99.7243	3.16643	3.17519	3.3968	3.4361
UK011	UK011_239	NA	174	3420	206.3	1.05795	NA	NA	64.1026	4.19437	0.0527	12.0449	NA	NA	0.113354	12.7543	0.0156	4.19437	0.16782	NA	NA	NA	NA	NA	99.7877	4.15324	4.33166	109.029	13.1861	13.2741	NA	NA	NA	16.1366	NA		99.7877	4.15324	4.16207	4.33166	4.32261
UK011	UK011_508	NA	262	4900	275.6	1.36706	NA	NA	64.1026	4.19437	0.056	12.2541	NA	NA	0.120452	12.952	0.0156	4.19437	0.40959	NA	NA	NA	NA	NA	99.7877	4.15324	4.33166	115.482	14.1389	14.2304	NA	NA	NA	1.66594	NA		99.7877	4.15324	4.16207	4.33166	4.36938
UK011	UK011_557	NA	75	1550	86.4	1.08953	NA	NA	64.1026	4.7005	0.052	25.9565	NA	NA	0.111848	26.3787	0.0156	4.7005	-0.077695	NA	NA	NA	NA	NA	99.7877	4.65441	4.81429	107.655	26.9506	26.9928	NA	NA	NA	57.1362	NA		99.7877	4.65441	4.66431	4.81429	4.80914
UK011	UK011_43	NA	241	4800	255	0.87931	NA	NA	63.9386	3.76904	0.0511	9.39985	NA	NA	0.110194	10.1273	0.01564	3.76904	-0.23632	NA	NA	NA	NA	NA	100.042	3.7415	3.93959	106.143	10.207	10.3148	NA	NA	NA	29.6776	NA		100.042	3.7415	3.73995	3.93959	3.89795
UK011	UK011_399	NA	666	12210	774	0.857143	NA	NA	63.7349	2.92066	0.0542	9.7268	NA	NA	0.117253	10.1558	0.01569	2.92066	0.31119	NA	NA	NA	NA	NA	100.359	2.90844	3.16072	112.578	10.8227	10.9363	NA	NA	NA	1.83127	NA		100.359	2.90844	2.89804	3.16072	3.1546
UK011	UK011_442	NA	254	4830	304	1.44076	NA	NA	63.6943	4.68056	0.0487	11.9136	NA	NA	0.105422	12.8	0.0157	4.68056	-0.027187	NA	NA	NA	NA	NA	100.422	4.66391	4.82546	101.769	12.3955	12.4776	NA	NA	NA	84.0379	NA		100.422	4.66391	4.64429	4.82546	4.79677
UK011	UK011_468	NA	50	799	53	2.07843	NA	NA	63.6943	5.76382	0.058	18.6824	NA	NA	0.125554	19.5513	0.0157	5.76382	0.46496	NA	NA	NA	NA	NA	100.422	5.74332	5.87527	120.094	22.1481	22.2112	NA	NA	NA	5.31783	NA		100.422	5.74332	5.71916	5.87527	5.92648
UK011	UK011_100	NA	130	3170	163.7	1.20634	NA	NA	63.5324	4.14868	0.04	15.5128	NA	NA	0.0868092	16.058	0.01574	4.14868	0.16837	NA	NA	NA	NA	NA	100.676	4.14429	4.32619	84.5267	13.0244	13.0793	NA	NA	NA	1.22331	NA		100.676	4.14429	4.11645	4.32619	4.33176
UK011	UK011_41	NA	239	5360	282.4	1.78734	NA	NA	63.4921	3.34955	0.0466	11.3433	NA	NA	0.101197	11.8275	0.01575	3.34955	0.23464	NA	NA	NA	NA	NA	100.74	3.3481	3.57106	97.8807	11.0368	11.1224	NA	NA	NA	59.4457	NA		100.74	3.3481	3.32352	3.57106	3.54708
UK011	UK011_16	NA	340	7810	382	0.903073	NA	NA	63.3714	3.46191	0.0458	11.6041	NA	NA	0.0996492	12.1095	0.01578	3.46191	-0.22298	NA	NA	NA	NA	NA	100.93	3.4669	3.68346	96.4525	11.1428	11.2252	NA	NA	NA	46.8912	NA		100.93	3.4669	3.43495	3.68346	3.6715
UK011	UK011_230	NA	248	5690	340.6	1.71501	NA	NA	63.1313	3.55661	0.0449	10.5129	NA	NA	0.0980625	11.0982	0.01584	3.55661	0.024164	NA	NA	NA	NA	NA	101.311	3.57507	3.78698	94.9863	10.064	10.1526	NA	NA	NA	23.1499	NA		101.311	3.57507	3.52881	3.78698	3.76309
UK011	UK011_525	NA	207	4130	223.8	1.16989	NA	NA	63.0517	3.26971	0.052	12.9365	NA	NA	0.113712	13.3433	0.01586	3.26971	-0.14315	NA	NA	NA	NA	NA	101.438	3.29077	3.52038	109.356	13.8342	13.9186	NA	NA	NA	28.1985	NA		101.438	3.29077	3.24412	3.52038	3.44894
UK011	UK011_131	NA	253	5030	259.6	1.27945	NA	NA	62.8931	3.87147	0.0504	11.3151	NA	NA	0.110492	11.9591	0.0159	3.87147	0.24043	NA	NA	NA	NA	NA	101.692	3.90607	4.10233	106.415	12.0827	12.1743	NA	NA	NA	42.3243	NA		101.692	3.90607	3.84109	4.10233	4.02891
UK011	UK011_309	NA	91	1840	107.3	1.77649	NA	NA	62.5	4.3738	0.047	15.1573	NA	NA	0.103686	15.7757	0.016	4.3738	-0.27705	NA	NA	NA	NA	NA	102.326	4.44021	4.61592	100.173	15.0496	15.1153	NA	NA	NA	79.7863	NA		102.326	4.44021	4.33927	4.61592	4.52385
UK011	UK011_466	NA	227	4190	272.9	0.945599	NA	NA	62.5	4.3738	0.0473	12.7133	NA	NA	0.104348	13.4446	0.016	4.3738	0.57166	NA	NA	NA	NA	NA	102.326	4.44021	4.61592	100.782	12.8997	12.9772	NA	NA	NA	77.8292	NA		102.326	4.44021	4.33927	4.61592	4.50365
UK011	UK011_149	NA	585	12080	632	0.956127	NA	NA	62.461	3.92498	0.0488	10.6326	NA	NA	0.107724	11.3339	0.01601	3.92498	-0.10963	NA	NA	NA	NA	NA	102.39	3.98703	4.18206	103.881	11.192	11.2865	NA	NA	NA	80.824	NA		102.39	3.98703	3.89398	4.18206	4.07629
UK011	UK011_537	NA	111	1950	101.8	1.74017	NA	NA	62.461	3.62225	0.06	18.3932	NA	NA	0.132448	18.7464	0.01601	3.62225	-0.071906	NA	NA	NA	NA	NA	102.39	3.67951	3.88998	126.295	22.2661	22.335	NA	NA	NA	3.8265	NA		102.39	3.67951	3.59363	3.88998	3.76723
UK011	UK011_235	NA	510	10130	590	1.55263	NA	NA	62.2665	3.25708	0.0523	10.3895	NA	NA	0.115811	10.8881	0.01606	3.25708	-0.32363	NA	NA	NA	NA	NA	102.707	3.31874	3.55205	111.267	11.4751	11.5801	NA	NA	NA	18.7045	NA		102.707	3.31874	3.23127	3.55205	3.41892
UK011	UK011_218	NA	188	3260	192.7	1.58993	NA	NA	62.1118	4.35711	0.056	13.163	NA	NA	0.124313	13.8654	0.0161	4.35711	-0.38492	NA	NA	NA	NA	NA	102.961	4.45047	4.62791	118.974	15.5677	15.6556	NA	NA	NA	7.29792	NA		102.961	4.45047	4.3225	4.62791	4.39511
UK011	UK011_500	NA	83	1323	76.1	2.26488	NA	NA	62.1118	4.35711	0.058	16.8855	NA	NA	0.128752	17.4385	0.0161	4.35711	0.26786	NA	NA	NA	NA	NA	102.961	4.45047	4.62791	122.976	20.2001	20.2723	NA	NA	NA	4.1946	NA		102.961	4.45047	4.3225	4.62791	4.50548
UK011	UK011_584	NA	670	12230	716	2.56631	NA	NA	61.8812	3.16849	0.0529	8.29841	NA	NA	0.117869	8.88274	0.01616	3.16849	0.44121	NA	NA	NA	NA	NA	103.341	3.24825	3.48911	113.138	9.51036	9.64073	NA	NA	NA	2.32158	NA		103.341	3.24825	3.14323	3.48911	3.39009
UK011	UK011_456	NA	156	3170	200.3	1.25031	NA	NA	61.8429	3.927	0.048	14.5542	NA	NA	0.107017	15.0747	0.01617	3.927	0.12053	NA	NA	NA	NA	NA	103.405	4.02831	4.22516	103.233	14.7982	14.8689	NA	NA	NA	98.1552	NA		103.405	4.02831	3.89568	4.22516	4.08632
UK011	UK011_45	NA	158	3390	172	1.12198	NA	NA	61.7665	3.42835	0.0451	12.9293	NA	NA	0.100676	13.3761	0.01619	3.42835	0.008475	NA	NA	NA	NA	NA	103.532	3.52108	3.74522	97.3999	12.4235	12.4989	NA	NA	NA	33.991	NA		103.532	3.52108	3.40097	3.74522	3.63318
UK011	UK011_393	NA	132	2650	164.7	1.95142	NA	NA	61.7284	4.58514	0.048	15.5019	NA	NA	0.107215	16.1658	0.0162	4.58514	0.27301	NA	NA	NA	NA	NA	103.595	4.71202	4.88198	103.415	15.896	15.9621	NA	NA	NA	98.122	NA		103.595	4.71202	4.5485	4.88198	4.71263
UK011	UK011_397	NA	350	6960	434	0.925373	NA	NA	61.7284	3.54352	0.0499	10.9033	NA	NA	0.111459	11.4646	0.0162	3.54352	0.3796	NA	NA	NA	NA	NA	103.595	3.64157	3.85898	107.3	11.6743	11.7707	NA	NA	NA	49.4682	NA		103.595	3.64157	3.5152	3.85898	3.72838
UK011	UK011_452	NA	91	1590	102.1	1.39672	NA	NA	61.7284	6.45075	0.055	15.9589	NA	NA	0.122851	17.2134	0.0162	6.45075	0.23731	NA	NA	NA	NA	NA	103.595	6.62926	6.75112	117.654	19.1251	19.1953	NA	NA	NA	13.5047	NA		103.595	6.62926	6.3992	6.75112	6.48361
UK011	UK011_261	NA	108	2360	133.8	1.79597	NA	NA	61.5385	4.05181	0.0447	12.6235	NA	NA	0.100153	13.2579	0.01625	4.05181	0.19332	NA	NA	NA	NA	NA	103.912	4.17657	4.36856	96.9172	12.2556	12.3313	NA	NA	NA	24.8428	NA		103.912	4.17657	4.01933	4.36856	4.21885
UK011	UK011_211	NA	296	6210	363.1	1.46885	NA	NA	61.5006	3.55789	0.0487	9.78992	NA	NA	0.109182	10.4164	0.01626	3.55789	0.34306	NA	NA	NA	NA	NA	103.976	3.66967	3.88703	105.217	10.4114	10.5154	NA	NA	NA	79.9756	NA		103.976	3.66967	3.52935	3.88703	3.73824
UK011	UK011_473	NA	879	17640	1084	1.64242	NA	NA	61.5006	3.14764	0.0485	9.01475	NA	NA	0.108734	9.54847	0.01626	3.14764	0.17185	NA	NA	NA	NA	NA	103.976	3.24652	3.49034	104.806	9.50852	9.62143	NA	NA	NA	86.1306	NA		103.976	3.24652	3.12239	3.49034	3.35533
UK011	UK011_279	NA	428	7910	427	1.01185	NA	NA	61.4251	3.55606	0.0561	10.8041	NA	NA	0.125927	11.3742	0.01628	3.55606	0.15334	NA	NA	NA	NA	NA	104.103	3.67222	3.88995	120.431	12.9177	13.0259	NA	NA	NA	1.1819	NA		104.103	3.67222	3.52751	3.88995	3.7157
UK011	UK011_262	NA	233	4210	233.8	0.868499	NA	NA	61.3497	4.56688	0.0541	11.8473	NA	NA	0.121587	12.697	0.0163	4.56688	-0.3579	NA	NA	NA	NA	NA	104.229	4.72176	4.89341	116.51	13.977	14.0711	NA	NA	NA	13.2857	NA		104.229	4.72176	4.53016	4.89341	4.60157
UK011	UK011_417	NA	213	3720	227.5	2.78117	NA	NA	61.1621	3.97082	0.058	14.8251	NA	NA	0.130752	15.3477	0.01635	3.97082	-0.25633	NA	NA	NA	NA	NA	104.547	4.11787	4.31478	124.773	18.0218	18.1049	NA	NA	NA	3.94842	NA		104.547	4.11787	3.93879	4.31478	4.05395
UK011	UK011_482	NA	156	2910	176	2.15951	NA	NA	60.9756	5.05039	0.05	13.4409	NA	NA	0.113062	14.3584	0.0164	5.05039	0.41049	NA	NA	NA	NA	NA	104.864	5.25318	5.40984	108.762	14.8103	14.8883	NA	NA	NA	56.5188	NA		104.864	5.25318	5.00953	5.40984	5.16358
UK011	UK011_21	NA	170	4210	205.3	1.15662	NA	NA	60.9385	3.4673	0.0431	13.1846	NA	NA	0.0975185	13.6329	0.01641	3.4673	0.01243	NA	NA	NA	NA	NA	104.927	3.60869	3.83342	94.4832	12.3003	12.3721	NA	NA	NA	10.0543	NA		104.927	3.60869	3.43924	3.83342	3.68181
UK011	UK011_203	NA	772	15510	878	1.11421	NA	NA	60.8273	3.09403	0.0502	8.88894	NA	NA	0.113791	9.41203	0.01644	3.09403	0.28452	NA	NA	NA	NA	NA	105.117	3.22598	3.47642	109.427	9.76405	9.88335	NA	NA	NA	35.8659	NA		105.117	3.22598	3.06894	3.47642	3.30502
UK011	UK011_512	NA	530	11740	604	1.41121	NA	NA	60.8273	3.33685	0.0481	10.6343	NA	NA	0.109031	11.1455	0.01644	3.33685	-0.32002	NA	NA	NA	NA	NA	105.117	3.47917	3.71256	105.078	11.1263	11.2234	NA	NA	NA	99.5071	NA		105.117	3.47917	3.30979	3.71256	3.53203
UK011	UK011_134	NA	83	1360	67	1.66667	NA	NA	60.6061	5.28578	0.061	21.9334	NA	NA	0.138776	22.5613	0.0165	5.28578	0.26076	NA	NA	NA	NA	NA	105.498	5.53101	5.68178	131.953	27.9242	27.9839	NA	NA	NA	5.32252	NA		105.498	5.53101	5.24277	5.68178	5.40487
UK011	UK011_155	NA	71	1570	82.3	1.9274	NA	NA	60.6061	5.5475	0.042	18.3896	NA	NA	0.0955508	19.2081	0.0165	5.5475	0.39619	NA	NA	NA	NA	NA	105.498	5.80487	5.9487	92.6611	17.0121	17.0622	NA	NA	NA	9.85919	NA		105.498	5.80487	5.50235	5.9487	5.62465
UK011	UK011_338	NA	120	2490	151.8	2.05413	NA	NA	60.6061	5.28578	0.0492	12.9732	NA	NA	0.111931	14.0087	0.0165	5.28578	0.40242	NA	NA	NA	NA	NA	105.498	5.53101	5.68178	107.73	14.3196	14.3988	NA	NA	NA	73.372	NA		105.498	5.53101	5.24277	5.68178	5.38657
UK011	UK011_224	NA	212	4040	227.9	1.53883	NA	NA	60.5694	3.51614	0.056	13.7526	NA	NA	0.127478	14.195	0.01651	3.51614	0.21779	NA	NA	NA	NA	NA	105.561	3.68146	3.90458	121.829	16.2979	16.3857	NA	NA	NA	4.24288	NA		105.561	3.68146	3.48751	3.90458	3.69827
UK011	UK011_169	NA	267	6080	323	1.07309	NA	NA	60.5327	4.01541	0.0466	12.1455	NA	NA	0.106144	12.792	0.01652	4.01541	-0.091932	NA	NA	NA	NA	NA	105.625	4.20671	4.40353	102.432	12.4645	12.5472	NA	NA	NA	63.6252	NA		105.625	4.20671	3.9827	4.40353	4.18467
UK011	UK011_368	NA	310	6300	384	1.27152	NA	NA	60.4961	3.55311	0.0487	9.6394	NA	NA	0.110995	10.2734	0.01653	3.55311	0.46619	NA	NA	NA	NA	NA	105.688	3.72459	3.94579	106.875	10.422	10.529	NA	NA	NA	79.8417	NA		105.688	3.72459	3.52414	3.94579	3.73549
UK011	UK011_81	NA	515	10440	548	2.96858	NA	NA	60.241	3.54687	0.0459	9.42474	NA	NA	0.105056	10.0701	0.0166	3.54687	0.56153	NA	NA	NA	NA	NA	106.132	3.73354	3.95603	101.433	9.72104	9.82488	NA	NA	NA	25.1961	NA		106.132	3.73354	3.51783	3.95603	3.71194
UK011	UK011_206	NA	96	1780	101	2.54408	NA	NA	60.241	5.26235	0.055	13.8439	NA	NA	0.125884	14.8103	0.0166	5.26235	-0.25129	NA	NA	NA	NA	NA	106.132	5.53931	5.69164	120.393	16.8156	16.8989	NA	NA	NA	13.4857	NA		106.132	5.53931	5.21927	5.69164	5.2578
UK011	UK011_207	NA	161	3150	180.6	1.32794	NA	NA	60.241	4.27723	0.051	14.0081	NA	NA	0.116729	14.6465	0.0166	4.27723	0.18121	NA	NA	NA	NA	NA	106.132	4.50235	4.68849	112.102	15.5464	15.6252	NA	NA	NA	43.8796	NA		106.132	4.50235	4.24222	4.68849	4.40979
UK011	UK011_437	NA	22	352	21	2.03883	NA	NA	60.241	7.70773	0.086	36.7073	NA	NA	0.196837	37.5078	0.0166	7.70773	0.019545	NA	NA	NA	NA	NA	106.132	8.11341	8.21816	182.447	62.7156	62.7643	NA	NA	NA	1.94866	NA		106.132	8.11341	7.64464	8.21816	7.67467
UK011	UK011_436	NA	137	2420	142.8	2.02841	NA	NA	59.8802	4.03599	0.0518	11.7245	NA	NA	0.119274	12.3997	0.0167	4.03599	0.33038	NA	NA	NA	NA	NA	106.766	4.27358	4.47154	114.414	13.4177	13.5124	NA	NA	NA	22.8898	NA		106.766	4.27358	4.00275	4.47154	4.18969
UK011	UK011_362	NA	292	5470	338	1.18472	NA	NA	59.6659	3.63001	0.0536	12.2608	NA	NA	0.123863	12.7869	0.01676	3.63001	-0.021067	NA	NA	NA	NA	NA	107.147	3.85728	4.07701	118.568	14.3104	14.4054	NA	NA	NA	12.7055	NA		107.147	3.85728	3.60001	4.07701	3.77639
UK011	UK011_66	NA	138	2700	137.8	1.77577	NA	NA	59.5238	5.21643	0.051	13.3954	NA	NA	0.118136	14.3752	0.0168	5.21643	-0.037736	NA	NA	NA	NA	NA	107.4	5.55604	5.71149	113.38	15.4228	15.5039	NA	NA	NA	47.189	NA		107.4	5.55604	5.17321	5.71149	5.28174
UK011	UK011_552	NA	190	3540	187.5	1.05101	NA	NA	59.5238	4.24687	0.054	13.4276	NA	NA	0.125085	14.0832	0.0168	4.24687	0.31276	NA	NA	NA	NA	NA	107.4	4.52336	4.713	119.671	15.8995	15.9866	NA	NA	NA	10.6401	NA		107.4	4.52336	4.21169	4.713	4.39325
UK011	UK011_42	NA	179	3800	190.3	1.74427	NA	NA	59.3472	3.97287	0.048	14.4553	NA	NA	0.111517	14.9914	0.01685	3.97287	-0.02043	NA	NA	NA	NA	NA	107.717	4.2439	4.44664	107.352	15.2732	15.347	NA	NA	NA	96.3489	NA		107.717	4.2439	3.93986	4.44664	4.12913
UK011	UK011_3	NA	361	6950	315.1	1.00032	NA	NA	59.1716	3.65608	0.054	12.2659	NA	NA	0.125829	12.7992	0.0169	3.65608	-0.40543	NA	NA	NA	NA	NA	108.034	3.9169	4.13694	120.343	14.5262	14.6224	NA	NA	NA	13.7595	NA		108.034	3.9169	3.62562	4.13694	3.7692
UK011	UK011_416	NA	200	4000	230.7	1.75304	NA	NA	59.1716	4.00988	0.0492	11.702	NA	NA	0.114644	12.37	0.0169	4.00988	0.36464	NA	NA	NA	NA	NA	108.034	4.29594	4.49747	110.205	12.9193	13.011	NA	NA	NA	71.8584	NA		108.034	4.29594	3.97647	4.49747	4.16407
UK011	UK011_453	NA	290	5680	343	1.11726	NA	NA	58.7889	3.4747	0.0499	11.2545	NA	NA	0.117032	11.7787	0.01701	3.4747	-0.43739	NA	NA	NA	NA	NA	108.731	3.7464	3.97875	112.378	12.5311	12.6291	NA	NA	NA	61.6966	NA		108.731	3.7464	3.44556	3.97875	3.63939
UK011	UK011_91	NA	236	4700	231.3	1.44834	NA	NA	58.651	3.48985	0.052	13.5702	NA	NA	0.122244	14.0117	0.01705	3.48985	0.016542	NA	NA	NA	NA	NA	108.985	3.77144	4.00337	117.105	15.4988	15.5845	NA	NA	NA	30.8485	NA		108.985	3.77144	3.46052	4.00337	3.65917
UK011	UK011_153	NA	196	3800	195	1.88042	NA	NA	58.5138	3.94319	0.054	14.1179	NA	NA	0.127244	14.6582	0.01709	3.94319	0.20863	NA	NA	NA	NA	NA	109.238	4.27119	4.47824	121.618	16.8024	16.8873	NA	NA	NA	13.4574	NA		109.238	4.27119	3.90997	4.47824	4.09431
UK011	UK011_7	NA	525	10070	438	1.30551	NA	NA	58.4795	3.08056	0.0539	9.064	NA	NA	0.127083	9.57319	0.0171	3.08056	0.23527	NA	NA	NA	NA	NA	109.302	3.33872	3.6001	121.473	10.9606	11.0901	NA	NA	NA	2.3434	NA		109.302	3.33872	3.05459	3.6001	3.28604
UK011	UK011_9	NA	369	6900	309	1.67027	NA	NA	58.4795	4.20294	0.0534	11.2384	NA	NA	0.125904	11.9986	0.0171	4.20294	-0.25624	NA	NA	NA	NA	NA	109.302	4.55516	4.75006	120.41	13.6246	13.7273	NA	NA	NA	15.1568	NA		109.302	4.55516	4.16751	4.75006	4.27942
UK011	UK011_603	NA	63	1120	58.8	1.90291	NA	NA	58.4795	6.96963	0.057	20.2324	NA	NA	0.134392	21.3992	0.0171	6.96963	0.29186	NA	NA	NA	NA	NA	109.302	7.55371	7.67282	128.036	25.7472	25.8083	NA	NA	NA	13.1588	NA		109.302	7.55371	6.91088	7.67282	7.0213
UK011	UK011_394	NA	374	8730	510	2.01183	NA	NA	58.2072	3.76755	0.0449	12.6534	NA	NA	0.106358	13.2024	0.01718	3.76755	-0.63357	NA	NA	NA	NA	NA	109.809	4.10206	4.3194	102.628	12.8879	12.9681	NA	NA	NA	36.2574	NA		109.809	4.10206	3.73564	4.3194	3.98622
UK011	UK011_556	NA	150	2860	142.2	1.264	NA	NA	58.1395	4.64599	0.0521	10.9302	NA	NA	0.123557	11.8766	0.0172	4.64599	0.26597	NA	NA	NA	NA	NA	109.936	5.06429	5.24229	118.292	13.2623	13.3643	NA	NA	NA	19.5978	NA		109.936	5.06429	4.6066	5.24229	4.75205
UK011	UK011_165	NA	148	2760	145.1	1.87953	NA	NA	57.8035	4.39788	0.053	13.7638	NA	NA	0.126422	14.4493	0.0173	4.39788	-0.54193	NA	NA	NA	NA	NA	110.569	4.82124	5.00998	120.878	16.4679	16.5536	NA	NA	NA	29.2164	NA		110.569	4.82124	4.36038	5.00998	4.45903
UK011	UK011_634	NA	225	4240	211.7	1.21041	NA	NA	57.8035	4.17466	0.0531	11.1646	NA	NA	0.126661	11.9196	0.0173	4.17466	0.40126	NA	NA	NA	NA	NA	110.569	4.57653	4.77496	121.093	13.6071	13.711	NA	NA	NA	9.38614	NA		110.569	4.57653	4.13907	4.77496	4.32971
UK011	UK011_387	NA	100	2420	143.8	2.12722	NA	NA	57.4713	4.16082	0.0433	12.132	NA	NA	0.103882	12.8256	0.0174	4.16082	0.37341	NA	NA	NA	NA	NA	111.203	4.58728	4.78746	100.353	12.2559	12.3368	NA	NA	NA	5.49949	NA		111.203	4.58728	4.12514	4.78746	4.30606
UK011	UK011_431	NA	127	2160	121.4	1.94864	NA	NA	57.4713	5.57937	0.0548	12.2375	NA	NA	0.131471	13.4493	0.0174	5.57937	0.65568	NA	NA	NA	NA	NA	111.203	6.15121	6.30191	125.419	15.8691	15.9644	NA	NA	NA	2.67301	NA		111.203	6.15121	5.53152	6.30191	5.78811
UK011	UK011_113	NA	260	6040	280	1.35922	NA	NA	57.3066	3.42325	0.0457	11.3721	NA	NA	0.109954	11.8761	0.01745	3.42325	0.22738	NA	NA	NA	NA	NA	111.52	3.78477	4.02639	105.924	11.9463	12.0382	NA	NA	NA	33.6775	NA		111.52	3.78477	3.39381	4.02639	3.61597
UK011	UK011_402	NA	356	7640	425.8	1.23064	NA	NA	57.2738	3.58512	0.0487	12.1845	NA	NA	0.11724	12.701	0.01746	3.58512	0.067476	NA	NA	NA	NA	NA	111.583	3.96596	4.19742	112.566	13.5338	13.6249	NA	NA	NA	88.7072	NA		111.583	3.96596	3.55427	4.19742	3.75961
UK011	UK011_74	NA	162	2670	131.4	1.10235	NA	NA	57.2082	3.87667	0.056	14.644	NA	NA	0.134968	15.1484	0.01748	3.87667	-0.0046116	NA	NA	NA	NA	NA	111.71	4.29332	4.50847	128.552	18.2933	18.3799	NA	NA	NA	7.54486	NA		111.71	4.29332	3.84328	4.50847	4.0045
UK011	UK011_463	NA	143	3190	187.3	2.42931	NA	NA	57.2082	3.43853	0.044	13.4267	NA	NA	0.106046	13.86	0.01748	3.43853	0.1288	NA	NA	NA	NA	NA	111.71	3.80809	4.0491	102.342	13.494	13.5703	NA	NA	NA	16.4667	NA		111.71	3.80809	3.40891	4.0491	3.63805
UK011	UK011_142	NA	80	1510	69.3	1.73684	NA	NA	57.1429	6.05908	0.052	22.42	NA	NA	0.125471	23.2243	0.0175	6.05908	0.10106	NA	NA	NA	NA	NA	111.837	6.71783	6.85764	120.02	26.2953	26.3483	NA	NA	NA	53.7863	NA		111.837	6.71783	6.00683	6.85764	6.1147
UK011	UK011_521	NA	160	3340	161.3	1.80022	NA	NA	57.0776	3.6173	0.049	17.7161	NA	NA	0.118367	18.0817	0.01752	3.6173	0.33591	NA	NA	NA	NA	NA	111.963	4.01508	4.24536	113.591	19.4343	19.4989	NA	NA	NA	86.0265	NA		111.963	4.01508	3.58607	4.24536	3.79338
UK011	UK011_194	NA	202	4360	231.4	2.71596	NA	NA	56.8182	3.76361	0.0465	12.1499	NA	NA	0.112841	12.7195	0.0176	3.76361	0.33934	NA	NA	NA	NA	NA	112.47	4.19622	4.41901	108.561	13.0966	13.1845	NA	NA	NA	52.4925	NA		112.47	4.19622	3.73097	4.41901	3.92818
UK011	UK011_236	NA	222	3900	205	2.24044	NA	NA	56.4972	4.12043	0.0552	10.7282	NA	NA	0.134714	11.4923	0.0177	4.12043	0.24113	NA	NA	NA	NA	NA	113.103	4.61971	4.8252	128.325	13.8545	13.9683	NA	NA	NA	2.51992	NA		113.103	4.61971	4.0845	4.8252	4.24874
UK011	UK011_479	NA	211	3840	210.3	1.80981	NA	NA	56.4334	3.71272	0.054	13.3497	NA	NA	0.131935	13.8563	0.01772	3.71272	-0.20911	NA	NA	NA	NA	NA	113.23	4.16721	4.39441	125.835	16.4004	16.4932	NA	NA	NA	15.7496	NA		113.23	4.16721	3.6803	4.39441	3.83843
UK011	UK011_135	NA	129	2260	103.3	2.13872	NA	NA	56.1798	4.10733	0.052	14.0221	NA	NA	0.127622	14.6113	0.0178	4.10733	-0.073995	NA	NA	NA	NA	NA	113.737	4.63059	4.83785	121.958	16.7926	16.8781	NA	NA	NA	35.5747	NA		113.737	4.63059	4.07131	4.83785	4.22738
UK011	UK011_443	NA	64	1370	77.4	1.22275	NA	NA	56.1798	5.48389	0.047	19.7721	NA	NA	0.11535	20.5185	0.0178	5.48389	-0.44145	NA	NA	NA	NA	NA	113.737	6.18251	6.33923	110.848	21.55	21.6057	NA	NA	NA	81.6337	NA		113.737	6.18251	5.4358	6.33923	5.59587
UK011	UK011_357	NA	389	8340	493	1.0883	NA	NA	56.0852	3.31402	0.048	11.9115	NA	NA	0.118003	12.3639	0.01783	3.31402	0.15829	NA	NA	NA	NA	NA	113.927	3.74239	3.9968	113.26	13.2514	13.3454	NA	NA	NA	91.9426	NA		113.927	3.74239	3.2849	3.9968	3.50894
UK011	UK011_19	NA	98	1950	83.7	2.01687	NA	NA	55.8659	4.98462	0.053	17.0589	NA	NA	0.130807	17.7722	0.0179	4.98462	0.38988	NA	NA	NA	NA	NA	114.37	5.65064	5.82357	124.822	20.8773	20.9492	NA	NA	NA	28.3476	NA		114.37	5.65064	4.94066	5.82357	5.10964
UK011	UK011_204	NA	107	2200	116.7	1.29811	NA	NA	55.8659	5.22068	0.051	19.1348	NA	NA	0.125871	19.8342	0.0179	5.22068	-0.15126	NA	NA	NA	NA	NA	114.37	5.91825	6.08357	120.38	22.5191	22.5814	NA	NA	NA	61.9235	NA		114.37	5.91825	5.17464	6.08357	5.29298
UK011	UK011_457	NA	139	2010	111.8	1.67616	NA	NA	55.8659	4.75318	0.058	13.7889	NA	NA	0.143147	14.5851	0.0179	4.75318	0.28805	NA	NA	NA	NA	NA	114.37	5.38828	5.56936	135.843	18.5468	18.6415	NA	NA	NA	1.67168	NA		114.37	5.38828	4.71126	5.56936	4.87062
UK011	UK011_528	NA	268	5800	275.7	1.40305	NA	NA	55.8347	3.869	0.0471	11.4807	NA	NA	0.11631	12.1151	0.01791	3.869	-0.015608	NA	NA	NA	NA	NA	114.434	4.38836	4.60913	111.721	12.8178	12.9126	NA	NA	NA	68.9954	NA		114.434	4.38836	3.83486	4.60913	4.03821
UK011	UK011_12	NA	541	10930	455.8	1.55034	NA	NA	55.4631	3.13841	0.0497	10.7342	NA	NA	0.123553	11.1835	0.01803	3.13841	-0.50521	NA	NA	NA	NA	NA	115.193	3.58313	3.85375	118.288	12.4879	12.5962	NA	NA	NA	67.2545	NA		115.193	3.58313	3.11053	3.85375	3.33066
UK011	UK011_70	NA	187	3700	173.3	1.5812	NA	NA	55.4324	3.34932	0.05	11.6769	NA	NA	0.124368	12.1478	0.01804	3.34932	0.21855	NA	NA	NA	NA	NA	115.257	3.82601	4.08083	119.024	13.6444	13.7447	NA	NA	NA	57.29	NA		115.257	3.82601	3.31955	4.08083	3.53858
UK011	UK011_129	NA	310	6350	283	1.46405	NA	NA	55.4017	3.6441	0.0518	11.8834	NA	NA	0.128916	12.4296	0.01805	3.6441	0.1959	NA	NA	NA	NA	NA	115.32	4.16502	4.40049	123.124	14.4133	14.5145	NA	NA	NA	27.3361	NA		115.32	4.16502	3.6117	4.40049	3.80894
UK011	UK011_627	NA	610	11570	552	1.23767	NA	NA	55.3097	3.71595	0.0516	8.51043	NA	NA	0.128632	9.28632	0.01808	3.71595	0.48573	NA	NA	NA	NA	NA	115.51	4.25407	4.48561	122.868	10.747	10.8819	NA	NA	NA	12.0627	NA		115.51	4.25407	3.68286	4.48561	3.89506
UK011	UK011_123	NA	87	1820	82.2	2.11856	NA	NA	55.2486	5.89905	0.053	17.1437	NA	NA	0.132268	18.1302	0.0181	5.89905	0.56342	NA	NA	NA	NA	NA	115.637	6.76065	6.90901	126.134	21.5082	21.5794	NA	NA	NA	26.0898	NA		115.637	6.76065	5.84646	6.90901	6.03272
UK011	UK011_336	NA	244	5200	287.5	1.49351	NA	NA	55.2486	4.0691	0.0444	11.6519	NA	NA	0.110806	12.3419	0.0181	4.0691	-0.067618	NA	NA	NA	NA	NA	115.637	4.66342	4.87601	106.702	12.5014	12.5905	NA	NA	NA	18.8571	NA		115.637	4.66342	4.03282	4.87601	4.26258
UK011	UK011_208	NA	322	6500	336	1.81328	NA	NA	54.8847	3.37018	0.051	9.58853	NA	NA	0.128121	10.1636	0.01822	3.37018	0.30345	NA	NA	NA	NA	NA	116.396	3.88757	4.14339	122.408	11.7209	11.8438	NA	NA	NA	28.3289	NA		116.396	3.88757	3.33994	4.14339	3.55796
UK011	UK011_464	NA	201	3700	211	1.76569	NA	NA	54.4959	3.32997	0.051	13.8451	NA	NA	0.129035	14.2399	0.01835	3.32997	-0.25696	NA	NA	NA	NA	NA	117.219	3.8681	4.12863	123.23	16.5263	16.6148	NA	NA	NA	50.3185	NA		117.219	3.8681	3.29988	4.12863	3.50463
UK011	UK011_181	NA	190	3190	154.9	1.31718	NA	NA	54.0541	4.22345	0.06	15.2513	NA	NA	0.153047	15.8253	0.0185	4.22345	-0.46281	NA	NA	NA	NA	NA	118.169	4.94534	5.15493	144.598	21.3315	21.4241	NA	NA	NA	2.93386	NA		118.169	4.94534	4.18498	5.15493	4.2436
UK011	UK011_247	NA	335	6310	316.5	1.93106	NA	NA	53.5619	3.38926	0.0563	10.7993	NA	NA	0.144929	11.3186	0.01867	3.38926	-0.13214	NA	NA	NA	NA	NA	119.245	4.00436	4.265	137.424	14.5489	14.672	NA	NA	NA	2.06046	NA		119.245	4.00436	3.3581	4.265	3.52508
UK011	UK011_379	NA	494	10630	584.7	1.27664	NA	NA	53.5045	3.40401	0.0474	11.2852	NA	NA	0.122149	11.7874	0.01869	3.40401	-0.0075498	NA	NA	NA	NA	NA	119.371	4.02603	4.28587	117.018	13.029	13.1307	NA	NA	NA	73.0287	NA		119.371	4.02603	3.37269	4.28587	3.59669
UK011	UK011_418	NA	180	3200	170.8	2.31123	NA	NA	53.4759	4.83553	0.058	13.589	NA	NA	0.149545	14.4237	0.0187	4.83553	0.089939	NA	NA	NA	NA	NA	119.435	5.72213	5.90803	141.51	19.0548	19.1543	NA	NA	NA	2.4149	NA		119.435	5.72213	4.79101	5.90803	4.89357
UK011	UK011_57	NA	198	4570	201.7	1.8607	NA	NA	53.1915	3.98566	0.0459	13.1104	NA	NA	0.118979	13.7028	0.0188	3.98566	0.20803	NA	NA	NA	NA	NA	120.067	4.74119	4.96626	114.146	14.7952	14.8807	NA	NA	NA	41.4949	NA		120.067	4.74119	3.94877	4.96626	4.14396
UK011	UK011_143	NA	120	2460	108	1.5	NA	NA	53.1915	3.98566	0.051	13.5114	NA	NA	0.132199	14.087	0.0188	3.98566	0.16529	NA	NA	NA	NA	NA	120.067	4.74119	4.96626	126.072	16.703	16.7944	NA	NA	NA	47.0374	NA		120.067	4.74119	3.94877	4.96626	4.12929
UK011	UK011_145	NA	165	3970	173.6	1.82545	NA	NA	52.6316	3.77604	0.041	16.0968	NA	NA	0.107409	16.5338	0.019	3.77604	-0.17245	NA	NA	NA	NA	NA	121.333	4.53873	4.77816	103.592	16.2843	16.3491	NA	NA	NA	4.28406	NA		121.333	4.53873	3.74073	4.77816	4.00171
UK011	UK011_248	NA	180	3890	189.9	1.26431	NA	NA	52.6316	4.15853	0.049	15.0802	NA	NA	0.128366	15.6431	0.019	4.15853	-0.15384	NA	NA	NA	NA	NA	121.333	4.99848	5.21685	122.629	18.0717	18.152	NA	NA	NA	89.419	NA		121.333	4.99848	4.11964	5.21685	4.29492
UK011	UK011_29	NA	699	15200	635	0.667718	NA	NA	52.1921	2.97646	0.0475	8.95243	NA	NA	0.125485	9.43426	0.01916	2.97646	0.37028	NA	NA	NA	NA	NA	122.345	3.60721	3.90892	120.032	10.6808	10.8107	NA	NA	NA	64.0871	NA		122.345	3.60721	2.94839	3.90892	3.19425
UK011	UK011_178	NA	281	6040	275.6	1.82759	NA	NA	52.1105	3.34131	0.0482	11.1132	NA	NA	0.127533	11.6047	0.01919	3.34131	-0.20653	NA	NA	NA	NA	NA	122.535	4.0556	4.32696	121.879	13.3285	13.4359	NA	NA	NA	92.8918	NA		122.535	4.0556	3.30976	4.32696	3.53363
UK011	UK011_213	NA	576	12800	632	1.10702	NA	NA	51.8941	3.61062	0.0453	9.00315	NA	NA	0.12036	9.70017	0.01927	3.61062	0.40401	NA	NA	NA	NA	NA	123.041	4.4004	4.6537	115.398	10.5815	10.7033	NA	NA	NA	11.2983	NA		123.041	4.4004	3.57638	4.6537	3.784
UK011	UK011_189	NA	238	5410	251	1.47647	NA	NA	51.7331	3.4412	0.0445	10.3868	NA	NA	0.118602	10.942	0.01933	3.4412	0.30278	NA	NA	NA	NA	NA	123.42	4.20674	4.47258	113.804	11.7805	11.8872	NA	NA	NA	8.57957	NA		123.42	4.20674	3.40847	4.47258	3.63029
UK011	UK011_346	NA	267	5510	287	2.16114	NA	NA	51.5464	3.91999	0.046	14.5876	NA	NA	0.123044	15.1051	0.0194	3.91999	0.10281	NA	NA	NA	NA	NA	123.863	4.80907	5.04489	117.828	16.8057	16.8858	NA	NA	NA	47.6462	NA		123.863	4.80907	3.88257	5.04489	4.08329
UK011	UK011_406	NA	740	16400	840	1.12601	NA	NA	51.5198	3.10832	0.0462	8.74603	NA	NA	0.123643	9.28195	0.01941	3.10832	0.25967	NA	NA	NA	NA	NA	123.926	3.81523	4.10878	118.369	10.3711	10.5014	NA	NA	NA	26.891	NA		123.926	3.81523	3.07863	4.10878	3.32192
UK011	UK011_54	NA	1410	28700	1240	1.24874	NA	NA	51.3611	3.06934	0.0493	7.86903	NA	NA	0.132347	8.44645	0.01947	3.06934	0.015953	NA	NA	NA	NA	NA	124.305	3.77881	4.07673	126.204	10.0243	10.1761	NA	NA	NA	72.1717	NA		124.305	3.77881	3.03994	4.07673	3.27359
UK011	UK011_110	NA	480	9120	385	0.974684	NA	NA	51.2558	3.39818	0.0522	9.9494	NA	NA	0.14042	10.5137	0.01951	3.39818	0.30191	NA	NA	NA	NA	NA	124.558	4.19209	4.46355	133.418	13.1454	13.2743	NA	NA	NA	15.9227	NA		124.558	4.19209	3.36556	4.46355	3.58223
UK011	UK011_340	NA	775	14860	780	0.910152	NA	NA	51.2295	3.19493	0.0522	8.10983	NA	NA	0.140492	8.71647	0.01952	3.19493	0.26831	NA	NA	NA	NA	NA	124.622	3.94334	4.23107	133.482	10.903	11.0582	NA	NA	NA	9.44124	NA		124.622	3.94334	3.16425	4.23107	3.38677
UK011	UK011_588	NA	228	4340	207	1.84164	NA	NA	51.2295	3.60736	0.0494	11.8461	NA	NA	0.132956	12.3832	0.01952	3.60736	0.28338	NA	NA	NA	NA	NA	124.622	4.45237	4.70911	126.75	14.7567	14.8611	NA	NA	NA	76.3787	NA		124.622	4.45237	3.57271	4.70911	3.77835
UK011	UK011_185	NA	138	2840	133	1.29883	NA	NA	51.1771	3.58899	0.051	19.8463	NA	NA	0.137403	20.1682	0.01954	3.58899	-0.088346	NA	NA	NA	NA	NA	124.748	4.43415	4.69239	130.728	24.7437	24.8099	NA	NA	NA	64.0162	NA		124.748	4.43415	3.55448	4.69239	3.75343
UK011	UK011_520	NA	212	4470	195	1.32653	NA	NA	50.2513	4.05158	0.0475	10.8904	NA	NA	0.130331	11.6196	0.0199	4.05158	0.1346	NA	NA	NA	NA	NA	127.024	5.0961	5.33038	124.395	13.6047	13.714	NA	NA	NA	70.4341	NA		127.024	5.0961	4.01192	5.33038	4.20392
UK011	UK011_501	NA	256	5440	237.1	1.51793	NA	NA	49.9002	3.27966	0.053	12.4337	NA	NA	0.146445	12.859	0.02004	3.27966	-0.039495	NA	NA	NA	NA	NA	127.909	4.15363	4.44176	138.768	16.68	16.7895	NA	NA	NA	21.2669	NA		127.909	4.15363	3.24734	4.44176	3.45337
UK011	UK011_316	NA	326	7090	334	1.23704	NA	NA	49.776	3.51542	0.0457	11.1912	NA	NA	0.126589	11.7304	0.02009	3.51542	0.15514	NA	NA	NA	NA	NA	128.225	4.4631	4.7337	121.028	13.3844	13.4899	NA	NA	NA	28.2548	NA		128.225	4.4631	3.48069	4.7337	3.70418
UK011	UK011_140	NA	508	10770	424	1.62328	NA	NA	49.3097	3.2403	0.0474	9.16368	NA	NA	0.13254	9.7197	0.02028	3.2403	0.18517	NA	NA	NA	NA	NA	129.425	4.15195	4.44676	126.378	11.5504	11.6828	NA	NA	NA	59.6485	NA		129.425	4.15195	3.20799	4.44676	3.44091
UK011	UK011_146	NA	563	11030	453	1.79762	NA	NA	49.2611	3.5797	0.0512	10.0912	NA	NA	0.143307	10.7073	0.0203	3.5797	0.48302	NA	NA	NA	NA	NA	129.552	4.59127	4.86001	135.985	13.6283	13.7571	NA	NA	NA	28.9228	NA		129.552	4.59127	3.54397	4.86001	3.76321
UK011	UK011_183	NA	395	7170	326.9	1.30395	NA	NA	49.0918	3.19656	0.0536	11.1019	NA	NA	0.150542	11.5529	0.02037	3.19656	0.14199	NA	NA	NA	NA	NA	129.994	4.11372	4.4136	142.39	15.3501	15.4748	NA	NA	NA	10.75	NA		129.994	4.11372	3.16455	4.4136	3.38462
UK011	UK011_106	NA	140	3050	125.9	1.55432	NA	NA	49.0196	3.54061	0.047	14.0039	NA	NA	0.132199	14.4446	0.0204	3.54061	-0.5548	NA	NA	NA	NA	NA	130.183	4.56306	4.83591	126.072	17.127	17.2162	NA	NA	NA	68.0847	NA		130.183	4.56306	3.5051	4.83591	3.73361
UK011	UK011_389	NA	274	5350	267	1.66771	NA	NA	48.8043	3.58146	0.056	12.2203	NA	NA	0.158209	12.7343	0.02049	3.58146	0.017987	NA	NA	NA	NA	NA	130.752	4.63566	4.90673	149.134	17.6642	17.7825	NA	NA	NA	4.48367	NA		130.752	4.63566	3.54538	4.90673	3.72181
UK011	UK011_563	NA	530	11030	473	1.77154	NA	NA	48.1464	3.36709	0.0479	9.04424	NA	NA	0.137174	9.65068	0.02077	3.36709	0.033931	NA	NA	NA	NA	NA	132.521	4.41654	4.70768	130.524	11.821	11.9584	NA	NA	NA	74.8777	NA		132.521	4.41654	3.33272	4.70768	3.55854
UK011	UK011_67	NA	429	9120	375.2	1.36238	NA	NA	48.0769	3.78483	0.0464	9.92243	NA	NA	0.133071	10.6198	0.0208	3.78483	0.1033	NA	NA	NA	NA	NA	132.71	4.9715	5.23257	126.853	12.6647	12.7864	NA	NA	NA	37.08	NA		132.71	4.9715	3.74614	5.23257	3.96153
UK011	UK011_271	NA	588	11730	500	1.05263	NA	NA	47.9157	2.84638	0.0485	8.76516	NA	NA	0.139561	9.21574	0.02087	2.84638	0.50761	NA	NA	NA	NA	NA	133.152	3.75114	4.093	132.653	11.4606	11.6066	NA	NA	NA	92.1198	NA		133.152	3.75114	2.81719	4.093	3.07305
UK011	UK011_454	NA	520	9590	468	1.20308	NA	NA	47.8469	3.31802	0.0498	8.62554	NA	NA	0.143508	9.2417	0.0209	3.31802	0.076424	NA	NA	NA	NA	NA	133.341	4.37885	4.67584	136.164	11.7771	11.9264	NA	NA	NA	64.5222	NA		133.341	4.37885	3.28394	4.67584	3.49917
UK011	UK011_217	NA	300	6770	295	1.32287	NA	NA	47.4158	3.43443	0.0467	10.0791	NA	NA	0.135798	10.6481	0.02109	3.43443	0.46938	NA	NA	NA	NA	NA	134.541	4.57283	4.86292	129.295	12.9277	13.0513	NA	NA	NA	36.0676	NA		134.541	4.57283	3.39884	4.86292	3.60729
UK011	UK011_597	NA	479	9500	390	1.9598	NA	NA	47.0367	3.07874	0.0525	9.52918	NA	NA	0.153895	10.0142	0.02126	3.07874	0.43153	NA	NA	NA	NA	NA	135.614	4.1316	4.45541	145.345	13.5622	13.7087	NA	NA	NA	11.7101	NA		135.614	4.1316	3.04658	4.45541	3.29657
UK011	UK011_349	NA	907	19130	910	2.84375	NA	NA	46.7946	3.03236	0.0476	8.23556	NA	NA	0.140253	8.77608	0.02137	3.03236	-0.11591	NA	NA	NA	NA	NA	136.309	4.08997	4.42003	133.269	10.9612	11.1151	NA	NA	NA	61.6066	NA		136.309	4.08997	3.00052	4.42003	3.2535
UK011	UK011_497	NA	351	7300	307	1.55051	NA	NA	46.729	3.57745	0.0486	11.7544	NA	NA	0.143401	12.2868	0.0214	3.57745	0.17983	NA	NA	NA	NA	NA	136.498	4.83181	5.11497	136.068	15.6479	15.7604	NA	NA	NA	95.5857	NA		136.498	4.83181	3.53984	5.11497	3.74777
UK011	UK011_607	NA	236	4360	181.9	1.98364	NA	NA	46.729	3.73362	0.0489	10.9303	NA	NA	0.144286	11.5503	0.0214	3.73362	-0.069285	NA	NA	NA	NA	NA	136.498	5.04274	5.31468	136.854	14.7892	14.9095	NA	NA	NA	96.438	NA		136.498	5.04274	3.69437	5.31468	3.89238
UK011	UK011_51	NA	305	5950	230.9	1.50915	NA	NA	46.5116	3.72544	0.053	16.3538	NA	NA	0.157114	16.7728	0.0215	3.72544	-0.50168	NA	NA	NA	NA	NA	137.129	5.0547	5.32845	148.174	23.1286	23.218	NA	NA	NA	39.8052	NA		137.129	5.0547	3.68609	5.32845	3.84745
UK011	UK011_281	NA	586	11500	470	1.74721	NA	NA	46.3177	3.25745	0.0511	9.51317	NA	NA	0.152116	10.0554	0.02159	3.25745	0.21014	NA	NA	NA	NA	NA	137.697	4.43784	4.74976	143.778	13.4814	13.6258	NA	NA	NA	36.0937	NA		137.697	4.43784	3.22291	4.74976	3.4434
UK011	UK011_637	NA	759	14510	574.8	1.63667	NA	NA	46.2963	3.10094	0.051	9.56803	NA	NA	0.151889	10.058	0.0216	3.10094	0.21905	NA	NA	NA	NA	NA	137.76	4.22654	4.55324	143.578	13.4673	13.6115	NA	NA	NA	37.9368	NA		137.76	4.22654	3.06804	4.55324	3.30097
UK011	UK011_151	NA	1220	24420	946	1.18546	NA	NA	45.9137	2.80454	0.0511	8.05737	NA	NA	0.153455	8.53151	0.02178	2.80454	0.14487	NA	NA	NA	NA	NA	138.896	3.85372	4.21503	144.958	11.5254	11.6965	NA	NA	NA	29.7663	NA		138.896	3.85372	2.77454	4.21503	3.02652
UK011	UK011_287	NA	1160	25250	1005	1.70339	NA	NA	45.683	3.14758	0.0467	8.61534	NA	NA	0.14095	9.17232	0.02189	3.14758	0.27782	NA	NA	NA	NA	NA	139.59	4.34647	4.6729	133.889	11.506	11.654	NA	NA	NA	30.3661	NA		139.59	4.34647	3.11374	4.6729	3.35327
UK011	UK011_278	NA	909	17510	701	3.22744	NA	NA	45.6621	3.54298	0.0515	8.85753	NA	NA	0.155508	9.53984	0.0219	3.54298	0.48019	NA	NA	NA	NA	NA	139.653	4.89466	5.18696	146.764	13.0369	13.192	NA	NA	NA	21.8638	NA		139.653	4.89466	3.50488	5.18696	3.72394
UK011	UK011_94	NA	459	8310	310	1.14391	NA	NA	45.4339	3.17806	0.0531	9.69298	NA	NA	0.161145	10.2007	0.02201	3.17806	-0.21993	NA	NA	NA	NA	NA	140.347	4.4121	4.73735	151.705	14.3753	14.525	NA	NA	NA	15.5789	NA		140.347	4.4121	3.14371	4.73735	3.34021
UK011	UK011_205	NA	1480	30300	1280	0.742459	NA	NA	45.3515	3.20027	0.0488	7.55265	NA	NA	0.148364	8.2027	0.02205	3.20027	-0.16817	NA	NA	NA	NA	NA	140.599	4.45083	4.77456	140.467	10.761	10.9338	NA	NA	NA	98.2869	NA		140.599	4.45083	3.16562	4.77456	3.39645
UK011	UK011_103	NA	570	11210	433	1.22524	NA	NA	45.2489	3.67828	0.0488	9.0451	NA	NA	0.148701	9.7644	0.0221	3.67828	0.049028	NA	NA	NA	NA	NA	140.914	5.12699	5.41163	140.764	12.8353	12.9811	NA	NA	NA	98.2362	NA		140.914	5.12699	3.63837	5.41163	3.84088
UK011	UK011_48	NA	2830	56700	2123	1.98226	NA	NA	45.1264	3.07212	0.0513	6.77427	NA	NA	0.156743	7.43832	0.02216	3.07212	0.60007	NA	NA	NA	NA	NA	141.293	4.29345	4.63135	147.848	10.2346	10.4341	NA	NA	NA	11.9718	NA		141.293	4.29345	3.03869	4.63135	3.29526
UK011	UK011_545	NA	1730	33000	1282	1.05601	NA	NA	45.045	4.15495	0.0523	7.45765	NA	NA	0.160087	8.53699	0.0222	4.15495	0.30524	NA	NA	NA	NA	NA	141.545	5.81703	6.07158	150.779	11.9624	12.1399	NA	NA	NA	11.2547	NA		141.545	5.81703	4.10967	6.07158	4.2641
UK011	UK011_474	NA	970	18200	815	1.72669	NA	NA	44.9438	2.86469	0.0516	9.28259	NA	NA	0.1583	9.71457	0.02225	2.86469	-0.00042362	NA	NA	NA	NA	NA	141.86	4.01948	4.38131	149.214	13.4815	13.6362	NA	NA	NA	29.7316	NA		141.86	4.01948	2.8334	4.38131	3.07556
UK011	UK011_63	NA	168	3190	117.4	1.23579	NA	NA	44.843	5.2335	0.06	18.8723	NA	NA	0.184483	19.5846	0.0223	5.2335	0.0058644	NA	NA	NA	NA	NA	142.176	7.35931	7.5639	171.911	30.9818	31.0697	NA	NA	NA	6.48677	NA		142.176	7.35931	5.17621	7.5639	5.26485
UK011	UK011_593	NA	396	7800	312	2.26251	NA	NA	44.843	3.51683	0.0523	9.75662	NA	NA	0.160808	10.3711	0.0223	3.51683	0.40475	NA	NA	NA	NA	NA	142.176	4.94535	5.24495	151.41	14.5892	14.7362	NA	NA	NA	16.9333	NA		142.176	4.94535	3.47834	5.24495	3.6957
UK011	UK011_154	NA	307	5740	221	2.54608	NA	NA	44.7628	3.32431	0.053	13.9832	NA	NA	0.163253	14.3729	0.02234	3.32431	0.35633	NA	NA	NA	NA	NA	142.428	4.68282	4.99926	153.546	20.4843	20.592	NA	NA	NA	25.2381	NA		142.428	4.68282	3.28785	4.99926	3.51917
UK011	UK011_268	NA	974	19040	766	2.67832	NA	NA	44.6429	3.37352	0.0515	7.69323	NA	NA	0.159058	8.40038	0.0224	3.37352	-0.045987	NA	NA	NA	NA	NA	142.806	4.76462	5.07755	149.879	11.7058	11.885	NA	NA	NA	27.1785	NA		142.806	4.76462	3.33643	5.07755	3.52896
UK011	UK011_59	NA	500	10850	400.9	2.0005	NA	NA	44.5434	3.2439	0.0486	10.7665	NA	NA	0.150437	11.2446	0.02245	3.2439	-0.30373	NA	NA	NA	NA	NA	143.121	4.59155	4.91688	142.297	14.9313	15.0593	NA	NA	NA	92.2302	NA		143.121	4.59155	3.20815	4.91688	3.43837
UK011	UK011_175	NA	799	15300	610	2.9341	NA	NA	44.4247	3.08246	0.0517	8.88838	NA	NA	0.16046	9.4077	0.02251	3.08246	0.25937	NA	NA	NA	NA	NA	143.5	4.37446	4.71651	151.106	13.2092	13.3707	NA	NA	NA	23.6008	NA		143.5	4.37446	3.04841	4.71651	3.28252
UK011	UK011_44	NA	1126	22190	808	1.23359	NA	NA	44.405	2.9834	0.052	7.63686	NA	NA	0.161463	8.19892	0.02252	2.9834	0.14176	NA	NA	NA	NA	NA	143.563	4.23571	4.58841	151.983	11.5737	11.7597	NA	NA	NA	15.3113	NA		143.563	4.23571	2.95043	4.58841	3.18147
UK011	UK011_359	NA	442	9380	428	1.85925	NA	NA	44.3066	3.1797	0.049	10.5392	NA	NA	0.152486	11.0085	0.02257	3.1797	0.10073	NA	NA	NA	NA	NA	143.878	4.52422	4.8574	144.104	14.7904	14.9228	NA	NA	NA	97.5974	NA		143.878	4.52422	3.14448	4.8574	3.37573
UK011	UK011_355	NA	702	13550	610	2.04492	NA	NA	44.287	3.48533	0.0523	8.95705	NA	NA	0.162827	9.61126	0.02258	3.48533	-0.086327	NA	NA	NA	NA	NA	143.941	4.96122	5.26709	153.175	13.6662	13.8264	NA	NA	NA	21.7819	NA		143.941	4.96122	3.44671	5.26709	3.6277
UK011	UK011_433	NA	333	6970	294.3	1.33409	NA	NA	44.2478	4.11293	0.0462	10.5497	NA	NA	0.143963	11.3231	0.0226	4.11293	-0.11509	NA	NA	NA	NA	NA	144.067	5.85965	6.12123	136.568	14.4698	14.5922	NA	NA	NA	35.4002	NA		144.067	5.85965	4.06731	6.12123	4.2865
UK011	UK011_386	NA	887	17840	789	1.1035	NA	NA	44.1696	3.21193	0.0527	8.80637	NA	NA	0.164508	9.37383	0.02264	3.21193	-0.30501	NA	NA	NA	NA	NA	144.319	4.58393	4.915	154.642	13.4468	13.6124	NA	NA	NA	18.3641	NA		144.319	4.58393	3.17625	4.915	3.36588
UK011	UK011_322	NA	854	17740	744	1.41176	NA	NA	43.8982	3.43266	0.0476	8.44438	NA	NA	0.149507	9.11541	0.02278	3.43266	-0.012063	NA	NA	NA	NA	NA	145.202	4.92856	5.24153	141.477	12.0386	12.1954	NA	NA	NA	56.7943	NA		145.202	4.92856	3.39429	5.24153	3.62351
UK011	UK011_612	NA	469	8910	347	2.07784	NA	NA	43.8596	3.77604	0.0514	10.1517	NA	NA	0.161584	10.8313	0.0228	3.77604	-0.22258	NA	NA	NA	NA	NA	145.328	5.42624	5.71249	152.089	15.3	15.4414	NA	NA	NA	43.6383	NA		145.328	5.42624	3.7338	5.71249	3.90195
UK011	UK011_76	NA	2410	44900	1716	1.91304	NA	NA	43.6872	2.96624	0.0519	7.00216	NA	NA	0.1638	7.60453	0.02289	2.96624	0.035359	NA	NA	NA	NA	NA	145.895	4.27899	4.63927	154.024	10.8681	11.0709	NA	NA	NA	16.008	NA		145.895	4.27899	2.93292	4.63927	3.15806
UK011	UK011_156	NA	4720	88500	3260	2.52713	NA	NA	43.6872	2.8432	0.0515	7.10876	NA	NA	0.162538	7.65626	0.02289	2.8432	0.34151	NA	NA	NA	NA	NA	145.895	4.10151	4.47609	152.922	10.8695	11.0696	NA	NA	NA	17.0637	NA		145.895	4.10151	2.81127	4.47609	3.06593
UK011	UK011_494	NA	647	12970	512	1.16073	NA	NA	43.6872	3.00254	0.0521	8.62638	NA	NA	0.164431	9.13399	0.02289	3.00254	0.29127	NA	NA	NA	NA	NA	145.895	4.33136	4.68762	154.575	13.0974	13.2673	NA	NA	NA	16.8002	NA		145.895	4.33136	2.96882	4.68762	3.21049
UK011	UK011_64	NA	288	5380	201	1.51128	NA	NA	43.6681	3.47982	0.0518	12.2892	NA	NA	0.163556	12.7724	0.0229	3.47982	-0.12908	NA	NA	NA	NA	NA	145.958	5.02201	5.33258	153.811	18.2318	18.3531	NA	NA	NA	42.2591	NA		145.958	5.02201	3.44073	5.33258	3.63464
UK011	UK011_289	NA	1004	22160	854	1.55414	NA	NA	43.592	2.93946	0.045	7.39494	NA	NA	0.142334	7.95773	0.02294	2.93946	-0.10848	NA	NA	NA	NA	NA	146.21	4.24941	4.61349	135.12	10.0681	10.2398	NA	NA	NA	4.97295	NA		146.21	4.24941	2.90638	4.61349	3.19859
UK011	UK011_82	NA	829	15990	597	0.692575	NA	NA	43.5161	2.99118	0.0483	8.3827	NA	NA	0.153038	8.90038	0.02298	2.99118	0.20706	NA	NA	NA	NA	NA	146.462	4.33156	4.69044	144.59	11.9954	12.1592	NA	NA	NA	75.2486	NA		146.462	4.33156	2.95746	4.69044	3.20482
UK011	UK011_522	NA	603	12140	441	1.96524	NA	NA	43.3651	3.08645	0.0521	9.091	NA	NA	0.165653	9.60065	0.02306	3.08645	0.13045	NA	NA	NA	NA	NA	146.966	4.48473	4.83453	155.639	13.8544	14.0171	NA	NA	NA	21.6875	NA		146.966	4.48473	3.05154	4.83453	3.27789
UK011	UK011_384	NA	415	8510	364	1.73333	NA	NA	43.3276	3.00729	0.0555	10.8205	NA	NA	0.176616	11.2306	0.02308	3.00729	-0.115	NA	NA	NA	NA	NA	147.092	4.3734	4.73202	165.144	17.1187	17.2659	NA	NA	NA	4.83009	NA		147.092	4.3734	2.97324	4.73202	3.1847
UK011	UK011_375	NA	223	4340	190.9	2.37143	NA	NA	43.29	4.06288	0.0541	10.692	NA	NA	0.17231	11.4379	0.0231	4.06288	0.35791	NA	NA	NA	NA	NA	147.218	5.91352	6.1839	161.422	17.072	17.2135	NA	NA	NA	7.68131	NA		147.218	5.91352	4.01684	6.1839	4.20311
UK011	UK011_458	NA	2160	42500	1883	3.38669	NA	NA	43.29	2.9202	0.0486	6.99864	NA	NA	0.154792	7.58344	0.0231	2.9202	0.22937	NA	NA	NA	NA	NA	147.218	4.25035	4.61913	146.134	10.3218	10.5155	NA	NA	NA	83.1982	NA		147.218	4.25035	2.88711	4.61913	3.13938
UK011	UK011_602	NA	4580	85300	3252	2.21224	NA	NA	43.2526	2.90418	0.0528	6.08367	NA	NA	0.168315	6.74131	0.02312	2.90418	0.37795	NA	NA	NA	NA	NA	147.344	4.23061	4.60158	157.956	9.86168	10.0952	NA	NA	NA	2.09163	NA		147.344	4.23061	2.87124	4.60158	3.1178
UK011	UK011_626	NA	1173	21750	817	1.36167	NA	NA	43.2152	3.0538	0.0536	8.38581	NA	NA	0.171013	8.92454	0.02314	3.0538	0.21432	NA	NA	NA	NA	NA	147.47	4.45233	4.80679	160.298	13.2345	13.4143	NA	NA	NA	5.02292	NA		147.47	4.45233	3.01914	4.80679	3.24798
UK011	UK011_591	NA	4880	100900	3810	1.98644	NA	NA	42.9369	2.75375	0.0487	6.23975	NA	NA	0.156387	6.82038	0.02329	2.75375	0.23201	NA	NA	NA	NA	NA	148.415	4.04031	4.43258	147.535	9.36586	9.58262	NA	NA	NA	84.9844	NA		148.415	4.04031	2.7223	4.43258	2.98816
UK011	UK011_472	NA	666	13130	554	1.08627	NA	NA	42.735	3.34813	0.0496	8.32303	NA	NA	0.160029	8.97122	0.0234	3.34813	0.34827	NA	NA	NA	NA	NA	149.108	4.93504	5.26394	150.729	12.5671	12.736	NA	NA	NA	78.3634	NA		149.108	4.93504	3.3097	5.26394	3.52953
UK011	UK011_582	NA	1620	32080	1232	1.99353	NA	NA	42.6257	3.02599	0.0533	7.90253	NA	NA	0.172408	8.46207	0.02346	3.02599	0.15321	NA	NA	NA	NA	NA	149.486	4.4714	4.83371	161.506	12.6359	12.8267	NA	NA	NA	6.049	NA		149.486	4.4714	2.99118	4.83371	3.21592
UK011	UK011_332	NA	1072	22350	939	1.98018	NA	NA	42.5351	2.96205	0.0495	8.22857	NA	NA	0.160457	8.74546	0.02351	2.96205	0.21471	NA	NA	NA	NA	NA	149.801	4.38603	4.75632	151.103	12.279	12.4526	NA	NA	NA	82.9948	NA		149.801	4.38603	2.9279	4.75632	3.17366
UK011	UK011_160	NA	614	13080	474	1.36955	NA	NA	42.4989	3.37932	0.0483	8.09853	NA	NA	0.1567	8.77531	0.02353	3.37932	0.51345	NA	NA	NA	NA	NA	149.927	5.00806	5.33588	147.811	12.0715	12.2411	NA	NA	NA	68.4449	NA		149.927	5.00806	3.34033	5.33588	3.55626
UK011	UK011_611	NA	1040	20600	751	1.62554	NA	NA	42.4088	3.35175	0.0504	8.7072	NA	NA	0.163861	9.33004	0.02358	3.35175	-0.019647	NA	NA	NA	NA	NA	150.242	4.97751	5.30855	154.077	13.3387	13.5045	NA	NA	NA	59.2934	NA		150.242	4.97751	3.313	5.30855	3.52196
UK011	UK011_186	NA	245	4070	155.7	1.443	NA	NA	42.3729	4.33659	0.054	12.2099	NA	NA	0.175714	12.9571	0.0236	4.33659	0.096637	NA	NA	NA	NA	NA	150.368	6.44537	6.70474	164.366	19.6652	19.7924	NA	NA	NA	16.5995	NA		150.368	6.44537	4.2864	6.70474	4.42966
UK011	UK011_541	NA	10060	205800	7510	1.56458	NA	NA	42.3012	2.88163	0.0514	5.53274	NA	NA	0.167537	6.23819	0.02364	2.88163	0.64556	NA	NA	NA	NA	NA	150.62	4.28999	4.67184	157.28	9.08953	9.34044	NA	NA	NA	6.24316	NA		150.62	4.28999	2.84823	4.67184	3.12044
UK011	UK011_486	NA	325	6330	250	1.79469	NA	NA	42.1941	3.43424	0.0508	10.559	NA	NA	0.166002	11.1035	0.0237	3.43424	0.13618	NA	NA	NA	NA	NA	150.998	5.12537	5.45054	155.943	16.0524	16.1936	NA	NA	NA	54.1628	NA		150.998	5.12537	3.39434	5.45054	3.60296
UK011	UK011_491	NA	391	8940	336	1.41176	NA	NA	42.0168	3.84578	0.0474	10.5138	NA	NA	0.155545	11.195	0.0238	3.84578	-0.14626	NA	NA	NA	NA	NA	151.627	5.76321	6.05657	146.796	15.3024	15.4348	NA	NA	NA	57.1874	NA		151.627	5.76321	3.8009	6.05657	4.01458
UK011	UK011_396	NA	2370	49400	2057	2.64736	NA	NA	41.841	2.99717	0.0513	6.65714	NA	NA	0.169051	7.30073	0.0239	2.99717	0.20367	NA	NA	NA	NA	NA	152.257	4.50993	4.88215	158.595	10.72	10.9369	NA	NA	NA	23.9561	NA		152.257	4.50993	2.96205	4.88215	3.19461
UK011	UK011_572	NA	810	15430	566	2.07326	NA	NA	41.1353	3.30563	0.0547	9.37052	NA	NA	0.183347	9.93649	0.02431	3.30563	-0.1115	NA	NA	NA	NA	NA	154.838	5.05738	5.40288	170.936	15.6336	15.8051	NA	NA	NA	5.9157	NA		154.838	5.05738	3.26625	5.40288	3.44717
UK011	UK011_533	NA	3060	56600	1960	2.64865	NA	NA	40.5022	2.90231	0.0534	6.46407	NA	NA	0.181787	7.08573	0.02469	2.90231	0.10324	NA	NA	NA	NA	NA	157.229	4.50807	4.90386	169.597	11.0677	11.3052	NA	NA	NA	3.24559	NA		157.229	4.50807	2.8672	4.90386	3.09159
UK011	UK011_182	NA	471	9610	353	1.49576	NA	NA	40.4858	3.38265	0.0491	10.8278	NA	NA	0.167217	11.3439	0.0247	3.38265	-0.15965	NA	NA	NA	NA	NA	157.292	5.25625	5.59966	157.001	16.5028	16.6419	NA	NA	NA	97.4331	NA		157.292	5.25625	3.34172	5.59966	3.56088
UK011	UK011_225	NA	746	16980	458	1.69004	NA	NA	29.1545	3.07855	0.0474	8.78891	NA	NA	0.224168	9.31248	0.0343	3.07855	0.29099	NA	NA	NA	NA	NA	217.404	6.5813	7.09717	205.373	17.3169	17.533	NA	NA	NA	14.587	NA		217.404	6.5813	3.02721	7.09717	3.2715
UK011	UK011_150	NA	465	8470	198.2	1.24185	NA	NA	27.933	3.51207	0.0548	9.96125	NA	NA	0.270498	10.5623	0.0358	3.51207	0.28067	NA	NA	NA	NA	NA	226.747	7.82507	8.30039	243.092	22.8376	23.0595	NA	NA	NA	13.9636	NA		226.747	7.82507	3.45102	8.30039	3.65516
UK011	UK011_18	NA	500	9450	201.7	0.705245	NA	NA	27.8552	3.25977	0.0547	9.68639	NA	NA	0.270759	10.2202	0.0359	3.25977	0.027348	NA	NA	NA	NA	NA	227.369	7.28252	7.79367	243.3	22.1145	22.344	NA	NA	NA	17.0355	NA		227.369	7.28252	3.20295	7.79367	3.40644
UK011	UK011_536	NA	371	6640	148.5	0.601215	NA	NA	26.3852	3.35579	0.058	13.0838	NA	NA	0.303088	13.5073	0.0379	3.35579	-0.24896	NA	NA	NA	NA	NA	239.803	7.89945	8.4236	268.809	31.9106	32.1006	NA	NA	NA	9.85726	NA		239.803	7.89945	3.29414	8.4236	3.47009
UK011	UK011_330	NA	503	8850	219.6	0.713914	NA	NA	25.7069	3.00108	0.0559	9.29795	NA	NA	0.299821	9.77028	0.0389	3.00108	0.2182	NA	NA	NA	NA	NA	246.011	7.24389	7.84026	266.261	22.887	23.1468	NA	NA	NA	7.38385	NA		246.011	7.24389	2.94454	7.84026	3.17908
UK011	UK011_161	NA	286	5160	113.5	1.66422	NA	NA	25.2525	3.87894	0.0522	12.5267	NA	NA	0.285015	13.1135	0.0396	3.87894	-0.64224	NA	NA	NA	NA	NA	250.353	9.5249	10.0017	254.628	29.5413	29.7279	NA	NA	NA	81.4505	NA		250.353	9.5249	3.80459	10.0017	3.98112
UK011	UK011_209	NA	251	4670	111.3	1.40708	NA	NA	25.2525	3.96997	0.0535	10.6859	NA	NA	0.292113	11.3995	0.0396	3.96997	-0.064104	NA	NA	NA	NA	NA	250.353	9.74844	10.2148	260.221	26.1736	26.3921	NA	NA	NA	49.0269	NA		250.353	9.74844	3.89388	10.2148	4.05844
UK011	UK011_191	NA	751	14060	323	0.475	NA	NA	25.2461	2.88989	0.052	8.45741	NA	NA	0.283994	8.93752	0.03961	2.88989	0.26567	NA	NA	NA	NA	NA	250.415	7.09797	7.72629	253.821	20.0747	20.3466	NA	NA	NA	72.6325	NA		250.415	7.09797	2.83448	7.72629	3.08402
UK011	UK011_273	NA	432	8260	181.7	1.19776	NA	NA	24.8756	3.51471	0.0508	11.4085	NA	NA	0.281573	11.9376	0.0402	3.51471	0.016751	NA	NA	NA	NA	NA	254.073	8.75623	9.28734	251.905	26.6376	26.8405	NA	NA	NA	87.6368	NA		254.073	8.75623	3.44635	9.28734	3.65831
UK011	UK011_93	NA	2290	41500	853	3.53942	NA	NA	24.8262	2.84833	0.0537	7.07666	NA	NA	0.298239	7.62837	0.04028	2.84833	-0.0025347	NA	NA	NA	NA	NA	254.568	7.10964	7.75672	265.024	17.7958	18.1258	NA	NA	NA	27.7379	NA		254.568	7.10964	2.79282	7.75672	3.03
UK011	UK011_242	NA	1254	24820	568	38.172	NA	NA	24.6305	2.97852	0.0532	7.48059	NA	NA	0.29781	8.05176	0.0406	2.97852	0.75297	NA	NA	NA	NA	NA	256.551	7.49137	8.11713	264.688	18.7628	19.0755	NA	NA	NA	24.8529	NA		256.551	7.49137	2.92003	8.11713	3.1896
UK011	UK011_92	NA	1670	29000	604	1.24793	NA	NA	24.3902	2.89934	0.0575	7.8043	NA	NA	0.325052	8.32546	0.041	2.89934	0.1498	NA	NA	NA	NA	NA	259.028	7.36123	8.00878	285.781	20.7405	21.0639	NA	NA	NA	1.15288	NA		259.028	7.36123	2.84186	8.00878	3.07038
UK011	UK011_252	NA	1340	27750	618	1.09381	NA	NA	24.1546	2.9688	0.0501	7.776	NA	NA	0.285982	8.32346	0.0414	2.9688	0.7771	NA	NA	NA	NA	NA	261.505	7.6082	8.24772	255.392	18.797	19.0902	NA	NA	NA	37.1358	NA		261.505	7.6082	2.90939	8.24772	3.13333
UK011	UK011_614	NA	1940	34800	717	2.00279	NA	NA	23.9808	3.01557	0.055	6.98576	NA	NA	0.316228	7.60884	0.0417	3.01557	0.031644	NA	NA	NA	NA	NA	263.362	7.78181	8.41656	278.997	18.5637	18.9098	NA	NA	NA	11.8149	NA		263.362	7.78181	2.9548	8.41656	3.1697
UK011	UK011_616	NA	1141	22610	470	1.78911	NA	NA	23.9234	3.46097	0.0498	8.0119	NA	NA	0.287017	8.72748	0.0418	3.46097	0.088798	NA	NA	NA	NA	NA	263.981	8.95176	9.51122	256.208	19.765	20.0456	NA	NA	NA	45.7042	NA		263.981	8.95176	3.39107	9.51122	3.61879
UK011	UK011_345	NA	735	14970	359	1.14331	NA	NA	23.8663	3.3154	0.0505	8.25243	NA	NA	0.291747	8.89351	0.0419	3.3154	0.39251	NA	NA	NA	NA	NA	264.599	8.59492	9.17875	259.934	20.3981	20.6772	NA	NA	NA	61.8272	NA		264.599	8.59492	3.24828	9.17875	3.46986
UK011	UK011_595	NA	1300	25800	554	1.35452	NA	NA	23.8663	3.06649	0.0498	7.91034	NA	NA	0.287703	8.48391	0.0419	3.06649	0.031137	NA	NA	NA	NA	NA	264.599	7.94964	8.5775	256.75	19.2489	19.5381	NA	NA	NA	44.4573	NA		264.599	7.94964	3.00441	8.5775	3.25513
UK011	UK011_344	NA	969	17940	429	0.703279	NA	NA	23.8322	2.85596	0.0544	8.20181	NA	NA	0.314728	8.68482	0.04196	2.85596	-0.42019	NA	NA	NA	NA	NA	264.971	7.41404	8.08537	277.839	21.1132	21.4159	NA	NA	NA	30.7983	NA		264.971	7.41404	2.79806	8.08537	3.02358
UK011	UK011_61	NA	699	12610	255.2	1.06823	NA	NA	23.8095	3.01147	0.0539	8.31424	NA	NA	0.312133	8.84283	0.042	3.01147	0.23781	NA	NA	NA	NA	NA	265.218	7.82491	8.46484	275.833	21.3622	21.6578	NA	NA	NA	31.266	NA		265.218	7.82491	2.95037	8.46484	3.1856
UK011	UK011_331	NA	223	3990	92.8	2.10909	NA	NA	23.753	3.52598	0.056	16.6457	NA	NA	0.325066	17.015	0.0421	3.52598	-0.081077	NA	NA	NA	NA	NA	265.837	9.18272	9.73624	285.792	42.4081	42.5675	NA	NA	NA	36.95	NA		265.837	9.18272	3.45427	9.73624	3.64651
UK011	UK011_543	NA	1540	29900	600	1.28755	NA	NA	23.753	3.06333	0.053	7.61397	NA	NA	0.307652	8.20711	0.0421	3.06333	0.045651	NA	NA	NA	NA	NA	265.837	7.97783	8.60917	272.359	19.6084	19.9229	NA	NA	NA	53.2077	NA		265.837	7.97783	3.00103	8.60917	3.22829
UK011	UK011_130	NA	803	15270	287.2	0.716209	NA	NA	23.6967	3.17828	0.0529	8.22944	NA	NA	0.307801	8.82186	0.0422	3.17828	0.40299	NA	NA	NA	NA	NA	266.455	8.29607	8.90756	272.475	21.0853	21.3784	NA	NA	NA	53.39	NA		266.455	8.29607	3.1135	8.90756	3.3434
UK011	UK011_14	NA	688	12420	224.5	1.17416	NA	NA	23.5849	3.83248	0.0571	9.55547	NA	NA	0.333813	10.2954	0.0424	3.83248	0.085168	NA	NA	NA	NA	NA	267.692	10.0492	10.5642	292.473	26.1684	26.436	NA	NA	NA	7.13292	NA		267.692	10.0492	3.754	10.5642	3.90936
UK011	UK011_210	NA	2140	42500	943	3.64093	NA	NA	23.5849	3.17422	0.0509	6.77492	NA	NA	0.297567	7.48166	0.0424	3.17422	0.38309	NA	NA	NA	NA	NA	267.692	8.32314	8.93814	264.498	17.4231	17.7589	NA	NA	NA	69.2515	NA		267.692	8.32314	3.10922	8.93814	3.34109
UK011	UK011_111	NA	2250	39910	791	1.22446	NA	NA	23.5682	2.91656	0.0545	6.91575	NA	NA	0.318839	7.5056	0.04243	2.91656	0.13784	NA	NA	NA	NA	NA	267.878	7.65272	8.3183	281.009	18.4265	18.7794	NA	NA	NA	16.7997	NA		267.878	7.65272	2.85679	8.3183	3.08912
UK011	UK011_495	NA	1950	37470	789	1.75333	NA	NA	23.4907	2.94628	0.0534	7.20528	NA	NA	0.313434	7.78438	0.04257	2.94628	-0.69039	NA	NA	NA	NA	NA	268.743	7.75517	8.41666	276.839	18.8644	19.2005	NA	NA	NA	51.5702	NA		268.743	7.75517	2.88572	8.41666	3.10752
UK011	UK011_460	NA	1950	38200	912	1.54839	NA	NA	23.4192	2.85478	0.0477	7.05689	NA	NA	0.280833	7.61246	0.0427	2.85478	0.28502	NA	NA	NA	NA	NA	269.547	7.53633	8.21928	251.318	16.9492	17.2649	NA	NA	NA	2.56925	NA		269.547	7.53633	2.79592	8.21928	3.06572
UK011	UK011_509	NA	2620	51900	1054	1.48388	NA	NA	23.4028	2.93561	0.0526	6.62506	NA	NA	0.309899	7.24633	0.04273	2.93561	0.30987	NA	NA	NA	NA	NA	269.733	7.75493	8.42103	274.103	17.409	17.7664	NA	NA	NA	60.1811	NA		269.733	7.75493	2.87504	8.42103	3.11873
UK011	UK011_341	NA	1470	29400	700	1.22807	NA	NA	23.3645	3.16626	0.0537	7.7169	NA	NA	0.316898	8.3412	0.0428	3.16626	0.27948	NA	NA	NA	NA	NA	270.165	8.37737	8.99938	279.514	20.3838	20.7004	NA	NA	NA	34.5834	NA		270.165	8.37737	3.10083	8.99938	3.32465
UK011	UK011_125	NA	1610	31750	592	2.10526	NA	NA	23.2019	3.04815	0.0506	7.43082	NA	NA	0.300697	8.0317	0.0431	3.04815	0.32246	NA	NA	NA	NA	NA	272.02	8.11906	8.76775	266.944	18.8556	19.1713	NA	NA	NA	57.1151	NA		272.02	8.11906	2.98473	8.76775	3.22636
UK011	UK011_400	NA	970	18350	424.3	1.50248	NA	NA	23.2019	3.22133	0.0533	8.24419	NA	NA	0.316742	8.85119	0.0431	3.22133	0.54783	NA	NA	NA	NA	NA	272.02	8.58034	9.19656	279.393	21.6223	21.9209	NA	NA	NA	42.4273	NA		272.02	8.58034	3.15431	9.19656	3.38858
UK011	UK011_4	NA	1258	24560	416	1.49104	NA	NA	23.1696	2.93576	0.0518	7.63406	NA	NA	0.308257	8.17909	0.04316	2.93576	-0.055972	NA	NA	NA	NA	NA	272.39	7.83014	8.50263	272.829	19.5708	19.8869	NA	NA	NA	96.7447	NA		272.39	7.83014	2.8746	8.50263	3.12073
UK011	UK011_286	NA	3090	58800	1185	1.42599	NA	NA	23.1481	2.94877	0.0539	6.89705	NA	NA	0.321051	7.50096	0.0432	2.94877	-0.23032	NA	NA	NA	NA	NA	272.638	7.87181	8.54217	282.711	18.5118	18.8668	NA	NA	NA	35.5126	NA		272.638	7.87181	2.88728	8.54217	3.11005
UK011	UK011_542	NA	834	16010	323	2.22759	NA	NA	23.1481	3.28278	0.0551	8.93505	NA	NA	0.328199	9.51902	0.0432	3.28278	0.061215	NA	NA	NA	NA	NA	272.638	8.76347	9.37025	288.19	23.8878	24.1733	NA	NA	NA	21.5011	NA		272.638	8.76347	3.21433	9.37025	3.41725
UK011	UK011_25	NA	730	14830	270	1.81696	NA	NA	23.0947	3.21701	0.0495	8.74922	NA	NA	0.295525	9.32191	0.0433	3.21701	0.14039	NA	NA	NA	NA	NA	273.256	8.60696	9.22669	262.899	21.5948	21.8638	NA	NA	NA	34.6485	NA		273.256	8.60696	3.14978	9.22669	3.38943
UK011	UK011_117	NA	1790	33500	613	0.820616	NA	NA	22.9885	2.99219	0.0519	7.10949	NA	NA	0.311285	7.71349	0.0435	2.99219	0.035107	NA	NA	NA	NA	NA	274.491	8.0409	8.70667	275.176	18.5948	18.9321	NA	NA	NA	94.538	NA		274.491	8.0409	2.92938	8.70667	3.17076
UK011	UK011_249	NA	1566	28200	596	1.99331	NA	NA	22.9885	3.27562	0.0567	7.19293	NA	NA	0.340074	7.90367	0.0435	3.27562	0.059137	NA	NA	NA	NA	NA	274.491	8.80255	9.41461	297.228	20.3686	20.7208	NA	NA	NA	3.77092	NA		274.491	8.80255	3.20686	9.41461	3.39109
UK011	UK011_381	NA	370	7270	172.1	1.17155	NA	NA	22.9885	3.48014	0.053	10.5774	NA	NA	0.317882	11.1352	0.0435	3.48014	0.17223	NA	NA	NA	NA	NA	274.491	9.35216	9.9304	280.272	27.2786	27.5173	NA	NA	NA	67.2295	NA		274.491	9.35216	3.40709	9.9304	3.61335
UK011	UK011_478	NA	1560	30400	685.8	1.49087	NA	NA	22.9885	3.04235	0.0502	7.10741	NA	NA	0.301089	7.73118	0.0435	3.04235	0.19175	NA	NA	NA	NA	NA	274.491	8.17568	8.8313	267.25	18.1681	18.4962	NA	NA	NA	43.0855	NA		274.491	8.17568	2.97849	8.8313	3.22707
UK011	UK011_361	NA	1390	27200	638	1.65285	NA	NA	22.92	2.85961	0.0524	7.5798	NA	NA	0.315223	8.10128	0.04363	2.85961	0.26726	NA	NA	NA	NA	NA	275.294	7.70661	8.40273	278.221	19.7177	20.0423	NA	NA	NA	76.019	NA		275.294	7.70661	2.79941	8.40273	3.05063
UK011	UK011_360	NA	1360	26130	612	0.404494	NA	NA	22.8833	3.09266	0.0544	7.89	NA	NA	0.327779	8.47447	0.0437	3.09266	0.041851	NA	NA	NA	NA	NA	275.727	8.34749	8.99607	287.869	21.2452	21.5651	NA	NA	NA	28.2562	NA		275.727	8.34749	3.02745	8.99607	3.24536
UK011	UK011_573	NA	2000	37900	788	3.71698	NA	NA	22.8833	3.20854	0.0524	6.7775	NA	NA	0.315729	7.49861	0.0437	3.20854	0.76737	NA	NA	NA	NA	NA	275.727	8.66026	9.28702	278.612	18.2728	18.6234	NA	NA	NA	65.5001	NA		275.727	8.66026	3.14089	9.28702	3.37811
UK011	UK011_444	NA	964	19840	452	2.54505	NA	NA	22.8728	2.93463	0.0471	8.05271	NA	NA	0.283924	8.57078	0.04372	2.93463	0.0030252	NA	NA	NA	NA	NA	275.85	7.92444	8.60553	253.766	19.2471	19.5304	NA	NA	NA	3.22456	NA		275.85	7.92444	2.87273	8.60553	3.157
UK011	UK011_276	NA	694	12990	263	0.935943	NA	NA	22.779	2.9416	0.0528	8.07137	NA	NA	0.319595	8.5907	0.0439	2.9416	0.46121	NA	NA	NA	NA	NA	276.962	7.97457	8.65686	281.591	21.1291	21.4387	NA	NA	NA	62.3779	NA		276.962	7.97457	2.8793	8.65686	3.12777
UK011	UK011_244	NA	1060	19480	415	1.32166	NA	NA	22.7273	3.20232	0.0545	8.22084	NA	NA	0.330636	8.82253	0.044	3.20232	0.032678	NA	NA	NA	NA	NA	277.579	8.70032	9.33233	290.051	22.263	22.5724	NA	NA	NA	29.3473	NA		277.579	8.70032	3.13435	9.33233	3.34367
UK011	UK011_428	NA	1510	27330	611	0.931402	NA	NA	22.7273	3.39531	0.0541	8.50652	NA	NA	0.32821	9.15909	0.044	3.39531	-0.2537	NA	NA	NA	NA	NA	277.579	9.22466	9.82299	288.198	22.9848	23.2814	NA	NA	NA	43.0478	NA		277.579	9.22466	3.32325	9.82299	3.5131
UK011	UK011_598	NA	436	7560	153.1	1.3313	NA	NA	22.6244	3.25942	0.0566	11.7517	NA	NA	0.344937	12.1953	0.0442	3.25942	0.44343	NA	NA	NA	NA	NA	278.814	8.894	9.51839	300.906	31.7689	32.0008	NA	NA	NA	13.1383	NA		278.814	8.894	3.18994	9.51839	3.42923
UK011	UK011_325	NA	1290	23920	527	1.84912	NA	NA	22.5581	2.93306	0.0534	8.60158	NA	NA	0.326393	9.0879	0.04433	2.93306	0.055938	NA	NA	NA	NA	NA	279.617	8.02601	8.71654	286.808	22.7109	23.0085	NA	NA	NA	54.4363	NA		279.617	8.02601	2.87036	8.71654	3.10965
UK011	UK011_192	NA	412	7550	158.1	1.57784	NA	NA	22.5124	2.90329	0.0541	9.31372	NA	NA	0.331342	9.75574	0.04442	2.90329	0.55245	NA	NA	NA	NA	NA	280.172	7.95999	8.65838	290.59	24.6583	24.9389	NA	NA	NA	33.1295	NA		280.172	7.95999	2.84111	8.65838	3.10191
UK011	UK011_403	NA	976	18030	404.2	1.48712	NA	NA	22.5124	2.92376	0.0554	8.34362	NA	NA	0.339304	8.84106	0.04442	2.92376	0.31249	NA	NA	NA	NA	NA	280.172	8.0161	8.71	296.645	22.7466	23.0615	NA	NA	NA	13.062	NA		280.172	8.0161	2.86113	8.71	3.10637
UK011	UK011_581	NA	206	4410	89.7	1.62206	NA	NA	22.4719	3.07994	0.0479	12.0341	NA	NA	0.293898	12.4219	0.0445	3.07994	0.16511	NA	NA	NA	NA	NA	280.666	8.45886	9.12133	261.623	28.6571	28.8587	NA	NA	NA	17.769	NA		280.666	8.45886	3.01385	9.12133	3.2589
UK011	UK011_105	NA	587	11450	216	1.47945	NA	NA	22.4215	3.37887	0.0511	8.60825	NA	NA	0.314237	9.24763	0.0446	3.37887	-0.021795	NA	NA	NA	NA	NA	281.283	9.29983	9.90875	277.46	22.4551	22.7393	NA	NA	NA	75.4513	NA		281.283	9.29983	3.30622	9.90875	3.53001
UK011	UK011_233	NA	303	6990	146.4	1.19706	NA	NA	22.4215	3.73937	0.0449	11.73	NA	NA	0.27611	12.3116	0.0446	3.73937	-0.089906	NA	NA	NA	NA	NA	281.283	10.2921	10.8454	247.567	27.0546	27.2483	NA	NA	NA	2.1986	NA		281.283	10.2921	3.65897	10.8454	3.92737
UK011	UK011_363	NA	998	19890	455.4	1.13312	NA	NA	22.3115	2.85557	0.0523	7.93661	NA	NA	0.323203	8.4347	0.04482	2.85557	-0.16546	NA	NA	NA	NA	NA	282.641	7.89663	8.61184	284.363	20.9223	21.2402	NA	NA	NA	88.3769	NA		282.641	7.89663	2.79388	8.61184	3.04393
UK011	UK011_310	NA	942	18400	374	0.994681	NA	NA	22.2717	3.37087	0.0511	8.06899	NA	NA	0.31635	8.74479	0.0449	3.37087	0.70547	NA	NA	NA	NA	NA	283.134	9.33753	9.95173	279.091	21.3423	21.6441	NA	NA	NA	61.5997	NA		283.134	9.33753	3.29792	9.95173	3.50467
UK011	UK011_188	NA	188	3070	61.8	1.75419	NA	NA	22.2222	4.82669	0.063	18.8111	NA	NA	0.39089	19.4205	0.045	4.82669	-0.084679	NA	NA	NA	NA	NA	283.751	13.3988	13.8356	335.019	55.4731	55.6334	NA	NA	NA	8.42327	NA		283.751	13.3988	4.72202	13.8356	4.81677
UK011	UK011_174	NA	589	10850	215.6	1.77595	NA	NA	22.1729	3.43224	0.0513	8.99354	NA	NA	0.319003	9.62621	0.0451	3.43224	0.21326	NA	NA	NA	NA	NA	284.368	9.54806	10.1545	281.136	23.6436	23.9199	NA	NA	NA	78.3239	NA		284.368	9.54806	3.35764	10.1545	3.57409
UK011	UK011_499	NA	940	17240	343	2.05512	NA	NA	22.1729	2.97359	0.0558	8.08823	NA	NA	0.346986	8.61752	0.0451	2.97359	0.09143	NA	NA	NA	NA	NA	284.368	8.27215	8.96533	302.452	22.5441	22.8724	NA	NA	NA	12.3157	NA		284.368	8.27215	2.90896	8.96533	3.13436
UK011	UK011_166	NA	686	12310	238.9	2.00084	NA	NA	22.1239	3.06932	0.0534	9.46818	NA	NA	0.332798	9.95325	0.0452	3.06932	0.24046	NA	NA	NA	NA	NA	284.985	8.55656	9.23116	291.7	25.2407	25.5167	NA	NA	NA	58.6576	NA		284.985	8.55656	3.00246	9.23116	3.23656
UK011	UK011_449	NA	1053	18640	414.3	1.01544	NA	NA	22.0751	3.49494	0.0538	8.72509	NA	NA	0.336033	9.39903	0.0453	3.49494	0.4787	NA	NA	NA	NA	NA	285.601	9.76371	10.3625	294.161	24.0081	24.3024	NA	NA	NA	42.0275	NA		285.601	9.76371	3.41865	10.3625	3.63258
UK011	UK011_37	NA	2190	41400	742	1.48697	NA	NA	22.0556	2.83912	0.0545	7.44022	NA	NA	0.340706	7.96351	0.04534	2.83912	0.099649	NA	NA	NA	NA	NA	285.848	7.93828	8.66527	297.706	20.5513	20.9013	NA	NA	NA	26.7265	NA		285.848	7.93828	2.7771	8.66527	3.01872
UK011	UK011_72	NA	825	15270	286.5	2.28651	NA	NA	22.0264	3.35784	0.0525	8.17608	NA	NA	0.328637	8.83875	0.0454	3.35784	0.52243	NA	NA	NA	NA	NA	286.218	9.40052	10.0235	288.525	22.2024	22.5099	NA	NA	NA	80.8946	NA		286.218	9.40052	3.28439	10.0235	3.50368
UK011	UK011_187	NA	853	16030	315.4	1.88299	NA	NA	22.0264	2.97031	0.0529	8.22397	NA	NA	0.331141	8.74393	0.0454	2.97031	0.1946	NA	NA	NA	NA	NA	286.218	8.3156	9.0139	290.436	22.0899	22.4024	NA	NA	NA	70.2302	NA		286.218	8.3156	2.90533	9.0139	3.14615
UK011	UK011_120	NA	267	4900	86.3	1.95249	NA	NA	21.7391	3.76019	0.0547	11.868	NA	NA	0.346934	12.4494	0.046	3.76019	0.63229	NA	NA	NA	NA	NA	289.917	10.6599	11.2269	302.412	32.5708	32.799	NA	NA	NA	36.0445	NA		289.917	10.6599	3.6769	11.2269	3.89676
UK011	UK011_356	NA	606	11400	250.9	1.37479	NA	NA	21.5054	3.39384	0.0534	8.41284	NA	NA	0.34237	9.07161	0.0465	3.39384	0.47226	NA	NA	NA	NA	NA	292.998	9.7213	10.3524	298.966	23.4971	23.8062	NA	NA	NA	56.6402	NA		292.998	9.7213	3.31788	10.3524	3.53558
UK011	UK011_395	NA	911	19610	418	2.29167	NA	NA	21.5054	3.52696	0.0477	8.67322	NA	NA	0.305825	9.36292	0.0465	3.52696	0.32749	NA	NA	NA	NA	NA	292.998	10.1026	10.7112	270.94	22.2689	22.5439	NA	NA	NA	3.58723	NA		292.998	10.1026	3.44801	10.7112	3.67463
UK011	UK011_531	NA	133	2890	53	1.98874	NA	NA	21.4592	3.04939	0.049	13.7195	NA	NA	0.314835	14.0543	0.0466	3.04939	0.19424	NA	NA	NA	NA	NA	293.614	8.7526	9.45137	277.922	34.1833	34.3714	NA	NA	NA	34.6485	NA		293.614	8.7526	2.98099	9.45137	3.22201
UK011	UK011_304	NA	820	15990	303	0.949843	NA	NA	21.3538	2.87408	0.0524	8.27492	NA	NA	0.338343	8.75983	0.04683	2.87408	-0.022461	NA	NA	NA	NA	NA	295.03	8.2883	9.02975	295.915	22.4898	22.8069	NA	NA	NA	94.1568	NA		295.03	8.2883	2.80931	9.02975	3.05947
UK011	UK011_377	NA	904	17060	372.9	1.00702	NA	NA	21.322	3.09512	0.056	8.82405	NA	NA	0.362128	9.35113	0.0469	3.09512	-0.042659	NA	NA	NA	NA	NA	295.461	8.93847	9.63189	313.802	25.248	25.5607	NA	NA	NA	17.9457	NA		295.461	8.93847	3.02526	9.63189	3.23601
UK011	UK011_294	NA	1940	38100	708	9.69863	NA	NA	21.0926	2.8915	0.0518	7.04858	NA	NA	0.338611	7.61861	0.04741	2.8915	-0.29826	NA	NA	NA	NA	NA	298.601	8.43713	9.1832	296.119	19.5707	19.9346	NA	NA	NA	83.2624	NA		298.601	8.43713	2.82556	9.1832	3.081
UK011	UK011_411	NA	1947	36650	761	5.43571	NA	NA	20.9776	2.82735	0.0536	6.75728	NA	NA	0.352299	7.32494	0.04767	2.82735	0.18302	NA	NA	NA	NA	NA	300.201	8.29312	9.05868	306.449	19.3787	19.7682	NA	NA	NA	52.547	NA		300.201	8.29312	2.76252	9.05868	3.01122
UK011	UK011_253	NA	669	12640	240	1.09091	NA	NA	20.9644	3.24403	0.0534	8.4556	NA	NA	0.351205	9.05654	0.0477	3.24403	0.020614	NA	NA	NA	NA	NA	300.385	9.52104	10.1956	305.627	23.9063	24.2217	NA	NA	NA	68.2104	NA		300.385	9.52104	3.16961	10.1956	3.38643
UK011	UK011_398	NA	1296	25170	524	3.03592	NA	NA	20.8681	2.77077	0.0532	7.61241	NA	NA	0.351504	8.10098	0.04792	2.77077	0.21054	NA	NA	NA	NA	NA	301.739	8.16785	8.95159	305.851	21.3966	21.7488	NA	NA	NA	69.8983	NA		301.739	8.16785	2.70693	8.95159	2.96401
UK011	UK011_32	NA	813	15490	254.7	13.3351	NA	NA	20.5761	3.07038	0.053	8.96627	NA	NA	0.355151	9.47741	0.0486	3.07038	-0.20093	NA	NA	NA	NA	NA	305.921	9.17354	9.8963	308.588	25.2252	25.5293	NA	NA	NA	85.1724	NA		305.921	9.17354	2.99867	9.8963	3.23041
UK011	UK011_266	NA	958	18570	338.8	1.75544	NA	NA	20.4918	2.97769	0.0508	7.68542	NA	NA	0.34181	8.24211	0.0488	2.97769	0.45417	NA	NA	NA	NA	NA	307.15	8.93151	9.67797	298.542	21.3219	21.6611	NA	NA	NA	36.2994	NA		307.15	8.93151	2.90786	9.67797	3.14942
UK011	UK011_20	NA	1054	20920	331	2.95009	NA	NA	20.3666	3.0177	0.0538	8.25471	NA	NA	0.364221	8.78901	0.0491	3.0177	-0.035964	NA	NA	NA	NA	NA	308.994	9.10456	9.84619	315.361	23.8303	24.1641	NA	NA	NA	62.2532	NA		308.994	9.10456	2.94652	9.84619	3.17768
UK011	UK011_215	NA	1372	24660	471	3.8449	NA	NA	20.3666	3.0177	0.0542	7.93859	NA	NA	0.366929	8.4928	0.0491	3.0177	-0.15484	NA	NA	NA	NA	NA	308.994	9.10456	9.84619	317.375	23.1522	23.4993	NA	NA	NA	52.2754	NA		308.994	9.10456	2.94652	9.84619	3.1721
UK011	UK011_600	NA	1400	27110	484.5	13.0946	NA	NA	20.3666	3.06355	0.0498	7.61013	NA	NA	0.337141	8.20362	0.0491	3.06355	0.15945	NA	NA	NA	NA	NA	308.994	9.24291	9.97426	295.003	21.0055	21.3428	NA	NA	NA	19.1878	NA		308.994	9.24291	2.99129	9.97426	3.24562
UK011	UK011_628	NA	1466	25700	453	0.951681	NA	NA	20.3666	3.11206	0.0567	7.09249	NA	NA	0.383854	7.74521	0.0491	3.11206	0.39391	NA	NA	NA	NA	NA	308.994	9.38924	10.11	329.87	21.8175	22.2102	NA	NA	NA	3.9385	NA		308.994	9.38924	3.03865	10.11	3.26882
UK011	UK011_498	NA	308	6280	116.3	2.25825	NA	NA	20.284	3.57498	0.0501	10.8551	NA	NA	0.340554	11.4286	0.0493	3.57498	0.32435	NA	NA	NA	NA	NA	310.223	10.8278	11.4632	297.591	29.4882	29.7332	NA	NA	NA	36.2602	NA		310.223	10.8278	3.49033	11.4632	3.6981
[truncated: 6,664 more rows]

## Sheet: HT Acquisition Parameter Table
Table A2-1	Data acquisition and laser settings (high throughput)
Laser	ASI Resochron
Type and wavelength	Excimer, 193 nm
Pulse width (ns)	20
Fluence	1.5 J/cm2
Sample cell	Laurin-Technic M-50 Dual Volume
Spot size (µm)	33
Sampling mode	Static spot
[truncated: 13 more rows]

[truncated: 4 more sheets: LowThroughputAges - LA-ICP-MS, LT Acquisition Parameter Table, 15-ECB-01 - TIMS, 15-CS-02 - TIMS]
